# Supplementary material for: Functional insights from a surface antigen mRNA-bound proteome
Source: eLife journal article supplement (doi:10.7554/elife.68136), 2021-03-30
Supplement: supp [file elife-68136-supp-v1.zip]

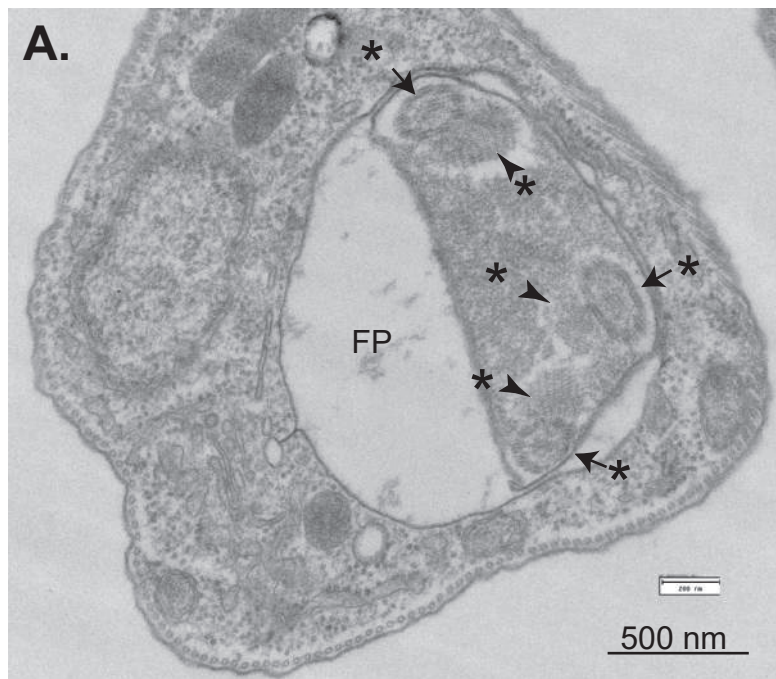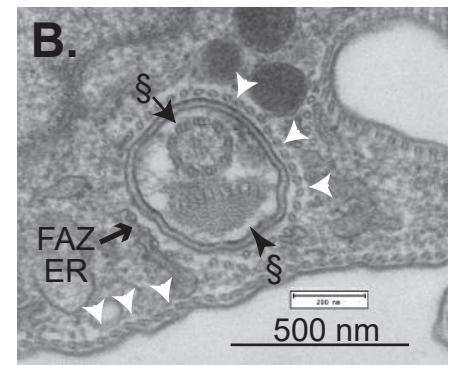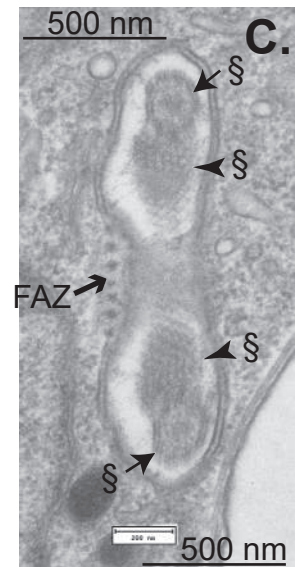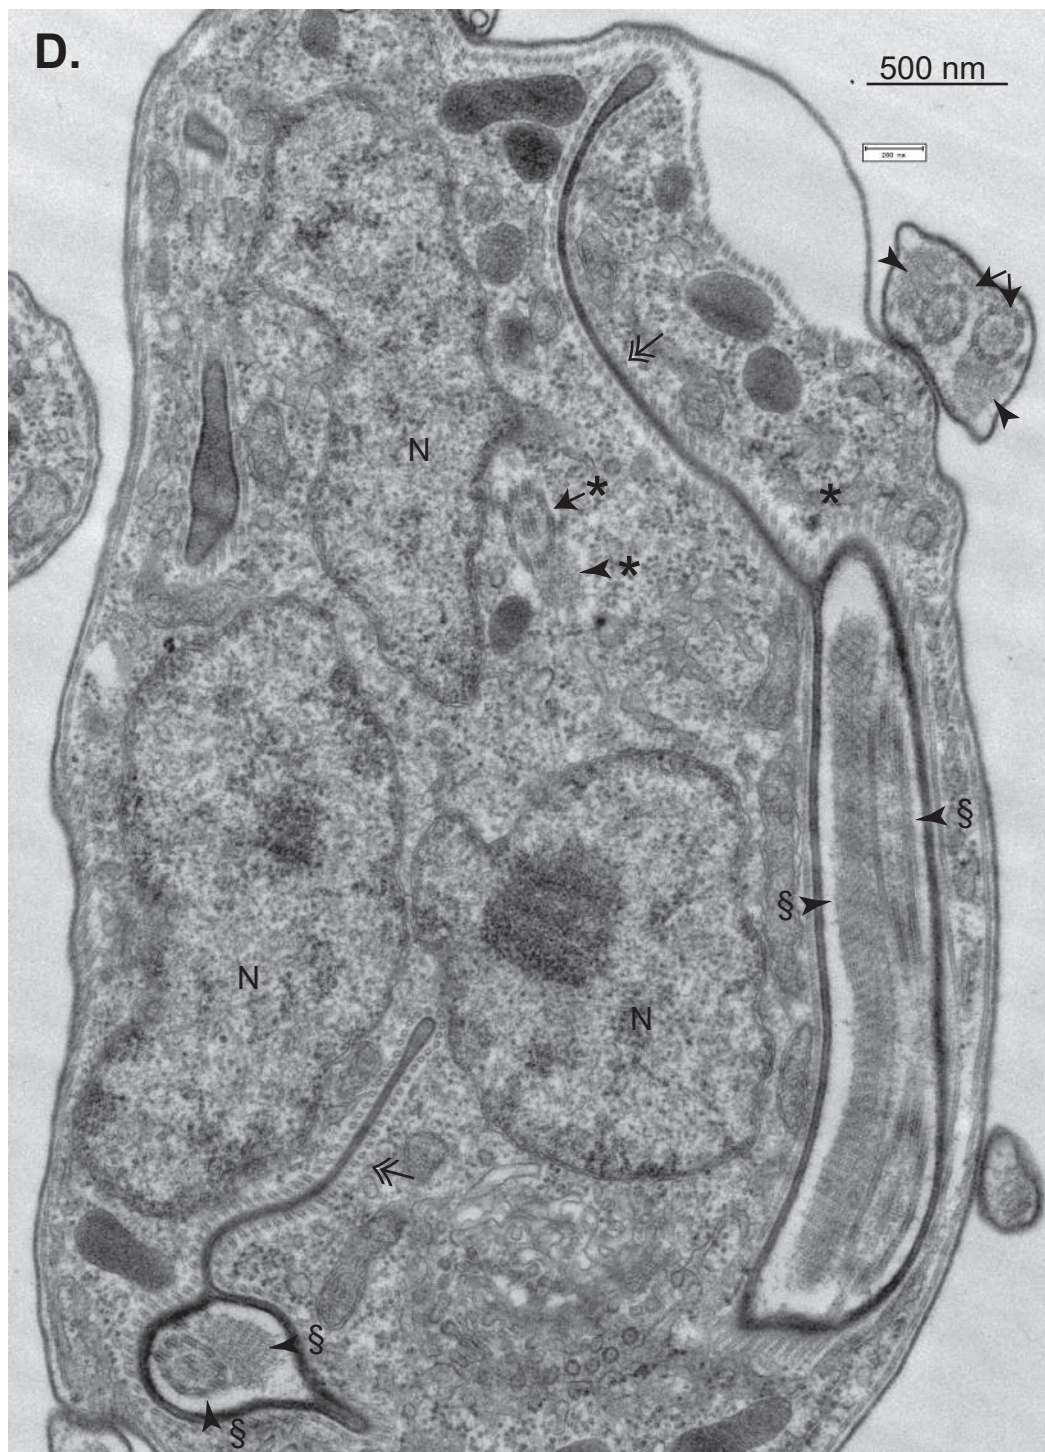

- axoneme
- paraflagellar rod
- \* cytosolic (no membrane)
- § internal (with membrane)
- FP: flagellar pocket
- K: kinetoplast
- ↙ other (abnormal)
- ↙ other
- N: nucleus
- ▣ corset microtubules
- FAZ ER - microtubules under Flagellar Attachment Zone with associated Endoplasmic Reticulum
