# Supplementary material for: Functional insights from a surface antigen mRNA-bound proteome
Source: eLife journal article supplement (doi:10.7554/elife.68136), 2021-03-30
Supplement: supp [file elife-68136-supp-v1.zip]

**A.**

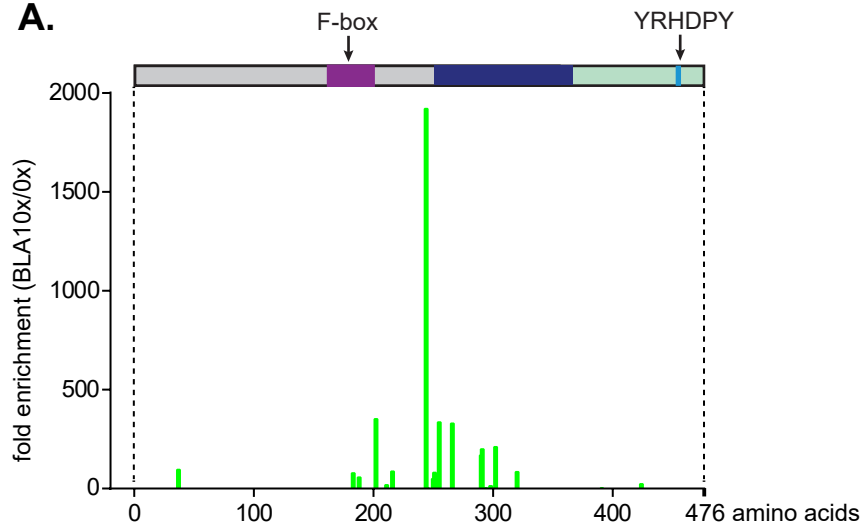

**B.**

|        |                                                               |
|--------|---------------------------------------------------------------|
| Pcon   | KLIRLFFGQQRRDSSPRALRRLLDYLPVDVTIPHVEAHTNKQSGRGKGCWVLVTNEHDK   |
| Tco70  | KPIRLFFGQQRRDAHPSALRRLRLRFIAPSLPIMHMEAHPNPVTGRGKGCWATVPSLAEA  |
| Tv67   | KPIRLFFGQQRRDAHPSALRRLRLRFIAPSLPIMHMEAHPNPVTGRGKGCWATVPSLAEA  |
| Tv45   | KPIRLFFGQQRRDAHASALRRLRLRFIVPSLPIMHMEAHTNSRNGRGKGCWVIVPSLAEA  |
| Tco60  | KPIRLYFGNQRRDVYPSALRRLRLRFIAPDLLITHMEGHANSCTGRGKGCWVVVPSVAEA  |
| TbCFB1 | KPIRLFFGQQRRDPHPASALRRLRLRFIAPDLVIAHMEAHTNPVNGRGKGCWVFALSQIDA |
| TbCFB2 | KPIRLFFGQQRRDVYPSALRRLRLRFIAPDLVITHMEAHPNEATGRGKGCWVIVPSVLEA  |
| Tcr    | KNIRLFFGQQRRDPHPASLRHLLNFLVPEISIPHMESHTNALNNGRGKGTWVVFVTSQDDV |
| Tra    | KTIRLFFGQQRRDNHPSSLRHLLNFLVPDVLIPQMEAHTNALNGRGKGTWVVFVTSQEDA  |
| Tth    | KNIRLFFGQQRRDNHPSSLRHLLNFLHPDMVIPHMEAHTNSLSGRGKGCSWVVFVTSREDA |
| Tgr    | KTIRLFFGQQRRDNHPSSLRHLLNFLVPDMAIPHMEAHTNPLNGRGKGCSWVVFVTSQSDA |

Pcon ERLCRLNRRFLDITAGP EnF<sub>Qo</sub> AGERILLAPPREAALMALAEYAIRAGACTQRPNHLPRQLVVV  
Tco70 KRLMALNKRFLD<sub>V</sub>NSD-----GEEVYMFAPPSAVE--WLRGHAELAAASTSRPSHLPRQPMIV  
Tv67 KRLMALNKRFLD<sub>V</sub>NSD-----GEEVYMFAPPSAVE--WLRGHAELAAASTSRPSHLPRQPMIV  
Tv45 KRLMALNRRFLD<sub>V</sub>NSD-----GEEVYMFAPP<sub>S</sub>AKE--WLHEHAELAAASTSRPNHLPRQPMVV  
Tco60 KRLLLLSGRIFLD<sub>V</sub>NSD-----GEEVYMF<sub>G</sub>PLTCRK--WLHNYAEHVTEVT<sub>P</sub>RQNHLP<sub>R</sub>QPMVV  
TbCFB1 ERLRLLSGRIFLD<sub>I</sub>NSN-----GEEVYL<sub>F</sub>FAPPNCRE--WLNEHAEC<sub>A</sub>VASAVRPSHLPRQPMVV  
TbCFB2 KRLRLLSGRIFLD<sub>I</sub>NSN-----GEEVYL<sub>F</sub>FAPPNCRE--WLSEYADYVVSSTTRASHLPYLPMVV  
Tcr KRLMRFNRLIFLD<sub>I</sub>NAD-----GREVYMVAPP<sub>R</sub>SRM--WIQEYAENIARWSTRPIYLP<sub>R</sub>QPMVI  
Tra KRLMQFNKLIFLD<sub>V</sub>NAD-----GKEVYMVAPP<sub>R</sub>SRA--WLQDRAESVGRWATRP<sub>M</sub>CLPRQPMVI  
Tth SRLMAFNKLLFLDMREN-----GEEVYLLAPP<sub>R</sub>SKD--WLQEYSQEVSTASYR<sub>S</sub>SNLP<sub>R</sub>QPMV  
Tgr KRLMGFNKLLFLDVNER-----GEEVYLLAPP<sub>C</sub>SKA--WLQKHAQDVGG<sub>R</sub>PF<sub>R</sub>NNLP<sub>R</sub>QAVV  
\*\* \* \* \* \* \* \* \* \* \* \* \* \* \* \* \* \*
