# Supplementary material for: Functional insights from a surface antigen mRNA-bound proteome
Source: eLife journal article supplement (doi:10.7554/elife.68136), 2021-03-30

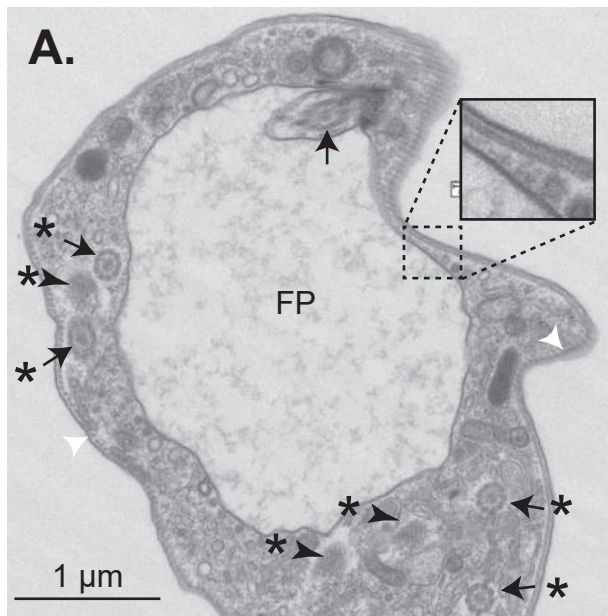

### Flagellae

- axoneme    ↙ paraflagellar rod
- \* cytosolic (no membrane)
- § internal (with membrane)

### Other

- ◀ corset microtubules
- FP: flagellar pocket    K: kinetoplast
- G: glycosome
- AP: autophagosome

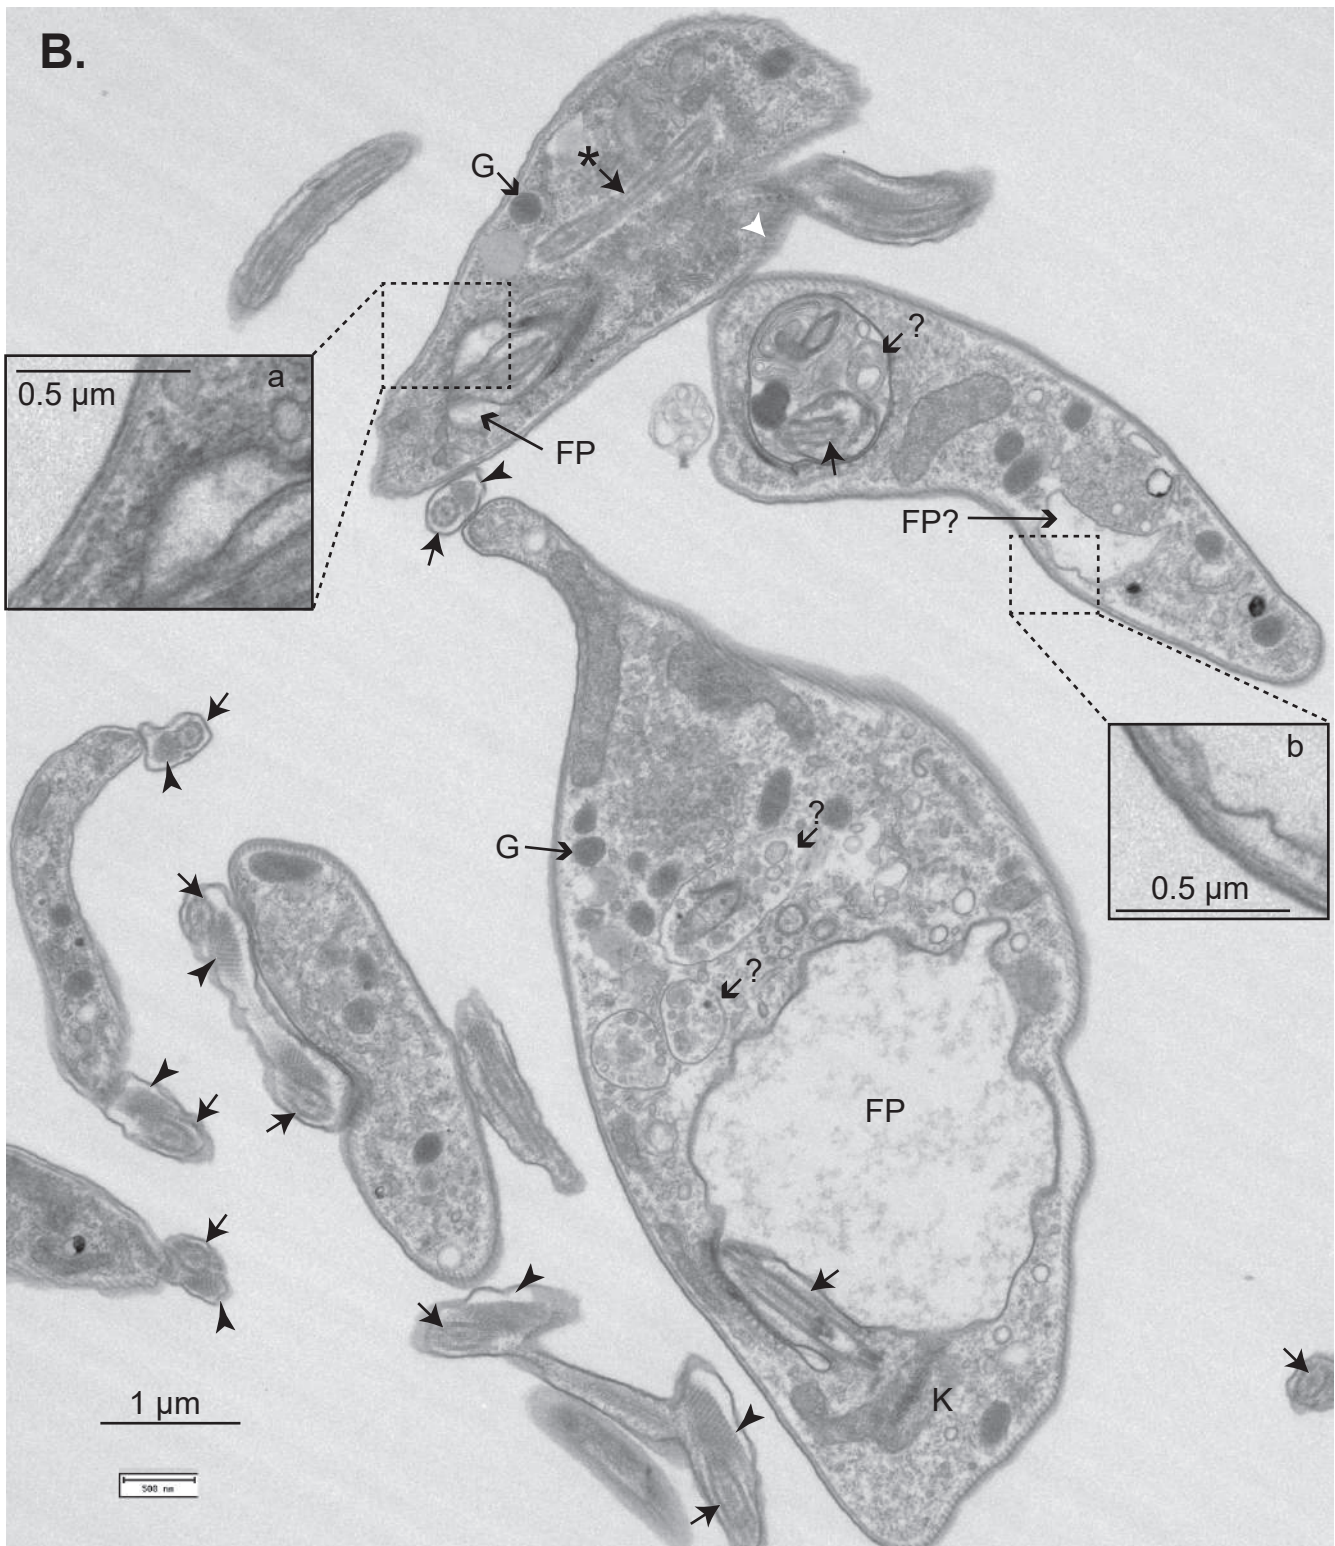

Supplement: supp [file elife-68136-supp-v1.zip]
