# Supplementary material for: Functional insights from a surface antigen mRNA-bound proteome
Source: eLife. 2021 Mar 30;10:e68136. doi: 10.7554/eLife.68136 (PMC8051951; doi:10.7554/eLife.68136)
Supplement: Supplementary file 1. [file elife-68136-supp1.xlsx]

## Sheet: Plasmids
pHD			Previously published at
	E.coli expression
3213	pETNusA-CFB2
3214	pETGB-CFB2
	Yeast 2-hybrid
3232	pADgate2 - CFB2mut FBOx
3233	pADgate2 - CFB2mutMKT1
2508	pADgate2 - CFB2 for Y2H		Singh et al.,2014
3346	pGBKT7 MKT1		Singh et al.,2014
3178	pGBKT7 skp1
	GFP Reporter plasmids	Selection in trypanosomes
1645	EGFP and act UTR in 1595, based on 1034	Puromycin	????
3215	pHD1645 + VSG 3' wt (CZ7595/96)	Puromycin
3216	pHD1645 + VSG 3' m16mer (CZ7597/98)	Puromycin
3217	pHD1645 +VSG 3' mUpst. (CZ7599/7600)	Puromycin
3218	pHD1645 +VSG 3' m8mer (CZ7602/7603)	Puromycin
	Tethering
3167	pHD2202+CFB2 Full length CDS (CZ7446/45)	Hygromycin
3168	pHD2202+CFB2 C-terminal (CZ7443/45)	Hygromycin
3169	pHD2202+CFB2 N-terminal (CZ7446/44)	Hygromycin
3220	pHD2202+CFB2 Full length mutFBOX F (CZ7611/12)	Hygromycin
3221	pHD2202+CFB2 Full length mutMKT1 (CZ7609/10)	Hygromycin
3223	pHD2202+CFB2 C-terminal mutMKT1 (CZ7609/10)	Hygromycin
3224	pHD2202+CFB2 N-terminal mutFBOX (CZ7611/12)	Hygromycin
	Inducible expression of CFB2
1816	pHD1701 +CFB2	Hygromycin	Benz at at., 2007
3225	pHD 1701+CFB2MutFBOX-Myc (CZ7611/12)	Hygromycin
3226	pHD 1701+CFB2MutMKT1-Myc (CZ7609/10)	Hygromycin
3228	pHD 1701+CFB2 no tag (CZ7620/19)	Hygromycin
	CFB2 -6x myc in pRpa
	In situ tagging and constitutive expression
1719	pBS-Blav5-skp1	Blasticidin	Benz at at., 2007
1718	pBS-Blav5-CFB2	Blasticidin	Benz at at., 2007
	CFB2-6xmyc in pHD1991	G418
	RNA interference
1723	p2T7 + CFB2 (not used)	Hygromycin
	pGL2084+378 bp CFB2 fragment	???
3235	RNAi to 3'-UTR CFB2	Hygromycin
OTHER	SBP-lambdaN-GFP in pRpa
	VSG gene with boxB in 3'-UTR	Blasticidin

## Sheet: Cloning and PCR oligos
CZ number	qPCR
	325	VSG224qPCRFw	AGCTCGCCCGCCAAAACCA
	326	VSG224qPCRRv	CTGCCTGTGCAGCCTGTCG
	126	qPCR_aTUBFw	TGCATGATCGCCAACTCCACGG
	127	qPCR_aTUBRv	ACCGACGTACCAGTGCACGA
		VSG222Fw	ACTCGACTTGGCGGAGGTGC
		VSG222Rv	TTTCTGCACTCCCGGTCGCT
		AntatFw	GCGCCAAACTCCAAGCAGCC
		AntatRv	CTTTGCCGTCTTCTGCGCCG
		CFB2-T7Fw	GCATAATACGACTCACTATAGGGAGAGTTGGAGTACCGAAGAAGG
		CFB2-T7Fw	TTGTAATACGACTCACTATAGGGAGACATCTCAGCGTAATCCACTT
		VSG224Fw	AGCTCGCCCGCCAAAACCA
		VSG224Rv	CTGCCTGTGCAGCCTGTCG
		CTR-Fw	TGGAAGGTGACTAACCACGGCACTTC
		CTR-Rv	GCGTCTGCCTGTGACGAGAGGTA
		CAT-Fw	CGCTCTGGAGTGAATACCACGACG
		CAT-Rv	ACGGGGGCGAAGAAGTTGTCC
		Cherry_Fw	GAGGTCAAGACCACCTACAAGGCC
		Cherry_Rv	AAGGAGGGGGGAAATTTGAGGGG
		CFB2-Fw	CTCCGTGATGCCCCCTTGAG
		CFB2-Rv	AGGGCTGAGTACAGGCACCAC
		Fwd-CFB2 ORF	TATACCATGGGGTCCTTGGAGGAGGGAAGC	Recombinant expression
		Rev-CFB2 ORF	TATAGGATCCCTACATCTCAGCGTAATCCACTT	Recombinant expression
CZ7443		4 CFB2 C-term tethering F	nnnGGGCCCAAACCCATCCGTCTGTTTTT
CZ7444		3 CFB2 N-term tethering R	nnnGGATCcCACACCAGGAATTTTAGGGG
CZ7445		2 CFB2 tethering R	nnnGGATCcCATCTCAGCGTAATCCACTT
CZ7446		1 CFB2- tethering F	nnnGGGCCCATGTCCTTGGAGGAGGGA
CZ7466		skp1 R	tatCCCGGGTTACGCCTCTTCGCACCA
CZ7467		skp1 F	ataCATATGATGGCGGAAGAGGTGTCG
CZ7595		3'UTR VSG wt F	GATCCAATTTTCCCCCTCTTTTTCTTAAAAATTCTTGCTACTTGAAAACTCCTGATATATTTTAACACAAAAG
CZ7596		3'UTR VSG wt R	TCGACTTTTGTGTTAAAATATATCAGGAGTTTTCAAGTAGCAAGAATTTTTAAGAAAAAGAGGGGGAAAATTG
CZ7597		3'UTR VSG mut16mer F	GATCCAATTTTCCCCCTCTTTTTCTTAAAAATTCTTGCTACTTGAAAACTCCATTATGATTACATATCAAAAG
CZ7598		3'UTR VSG mut16mer R	TCGACTTTTGATATGTAATCATAATGGAGTTTTCAAGTAGCAAGAATTTTTAAGAAAAAGAGGGGGAAAATTG
CZ7599		3'UTR VSG mut int. F	GATCCAATCTATCGCATCTGTATCTGACACATTCTTGCTACTTGAAAACTCCTGATATATTTTAACACAAAAG
CZ7600		3'UTR VSG mut int R	TCGACTTTTGTGTTAAAATATATCAGGAGTTTTCAAGTAGCAAGAATGTGTCAGATACAGATGCGATAGATTG
CZ7602		3'UTR VSG mut8mer F	GATCCAATTTTCCCCCTCTTTTTCTTAAAAATTCTATTTGTCCGAAAACTCCTGATATATTTTAACACAAAAG
CZ7603		3'UTR VSG mut8mer R	TCGACTTTTGTGTTAAAATATATCAGGAGTTTTCGGACAAATAGAATTTTTAAGAAAAAGAGGGGGAAAATTG
CZ7609		CFB2 mutMKT1 R	AGCAGCGCGGTACCGACTGAAGCC
CZ7610		CFB2 mutMKT1 F	GCGGCTGTGTTTGATCCACTACGGGAG
CZ7611		CFB2 mutFBOX R	GAAGCGTATGGAGCGGCACCATACGCGGCGGATTCCGCCGCATCGTGAAGGGTCAAAGG
CZ7612		CFB2 mutFBOX F	CCTTCCAGACGTCATTGCCTTATCACGGACATGTGCGGCGTTTCACAAACTGGTGCAG
CZ7613		RNAi fow 3UTR CFB2 fowseq R	TTTgttaacggatccggaagggtgaaaaggagggg
CZ7614		RNAi frag 3UTR CFB2 fowseq F	AAAgggcccaagctttgtgtgtacgatgcagcagt
CZ7619		CFB2 ORF (STOP) R	AAAggatccTCACATCTCAGCGTAATCCA
CZ7620		CFB2 ORF F	AAAaagcttATGTCCTTGGAGGAGGGAAG
CZ7621		RNAi rev 3UTR CFB2revseq R	aaaagatatcggaagggtgaaaaggagggg
CZ7622		RNAi rev 3UTR CFB2revseq F	aaagatctgtgtgtgtacgatgcagcagt
CZ7791		1eGFP_forward	GAAGTTCATCTGCACCACC	qPCR
CZ7790		1eGFP_reverse	TTGTACTCCAGCTTGTGCC	qPCR

## Sheet: 90-mer alphaTUB
[Btn]tgctttgttgttgttgttagtggtgctagtacctactgttgctaatataaacggatgaatagtcctttgcttaagctagtgtttgaagat
[Btn]cagaacaattcccagcaggcgttaccaacctggcaaccagcctgaccaatgtggatgcagatagcctcacgcatgataaataaatagaag
[Btn]tcagagaagaaggtgttgaacgcatcatcctcaacgccaatcgtcttgtcagagggcatcgcaccatcgggttgaatgccgtgttccagg
[Btn]tggcggtacgtgccagtgcgcacttcatccaccactgttggctccaggtccaagaacaccgcgcggggaacgtgcttgccagcaccagtc
[Btn]acgatctccttaccaatggtgtagtggccacgagcgtagttgttggccgcatcctccttgccggagatcagctgctcggggtggaacagc
[Btn]gtgccaccgccgacggcgtgatacacgaggaagccctgaagaccagtgcagttgtcagcgagcttgcggatgcggtccaggcagaggtcg
[Btn]ggtgatggatacaccgtgtagccgagcttggacttcttgccatagtccacggagaggcgctccaagagcagcgcacccaggccagaacca
[Btn]tcaagcatcgcagcaacatcggtgtgctccagaagtgagtgtgtcgagagcacagagttgtagggctccacgacagccgtcgacacctgc
[Btn]accacctgaccgatgaggcggttcaggttggtgtacgtggggcgctcaatatcgaggttgcggcgagtcaaatcataaattgcttcattg
[Btn]atacgtgggtacggcacaaggtttgtctggaactctgtcagatccacgttcaatgcaccgtcgaagcggagggacgctgtcagcgaggaa
[Btn]acagcgttcgagatctcagagacagagagttgctcgtggtaggccttctctgcggagatgactggtgcatagcttgtcagcacgaagtgg
[Btn]ggcacaacgtcaccacggtacatgaggcagcacgccatgtacttgccgtggcgggggtcgcactttgtcatcatggaggcgggctcaaac
[Btn]ataccgcacttgaagcctgtgggagaccagtccacgaactgaatcgtgcgcttcgtcttgatggtcgcgacggcagcattcacatccttt
[Btn]gcgatggccgtggagttggcgatcatgcataccgcgcgctgcaccttggcaaggtcaccacctggcaccaccgtgggtggctggtagttg
[Btn]tcttccataccctcaccgacgtaccagtgcacgaaggcgcgcttgctgtacatgagatcgaatttgtggtcaatacgagcgaacacctct
[Btn]tcaccgtccatatccgcggactcggcaccaacctcttcgtagtccttctcaagtgctgcaaggtcttcacgggcctcggagaactcaccc
[Btn]aattcacaaaagaaagaaagaaagaacataaatgaaaacctacacatggtgcgacgttgtcacactttctagtactcctccacatcctcc

## Sheet: 90-mer VSG221
[Btn]AACTTGGGCTAGGACCAAGACGGCGAGGAAAAGCCGGGCCTCCTGATTGGAAGGCATGCCGCGTTCGTGTCGCGTAGGAATAACTACAAT
[Btn]GTCGTCTAGCTCCTCGGAGACCTGGCAAAGAGGTTGCCAAAAAGCTTGTTTGAAACCTTTTTCAGCCGCCGAATCGACAAGAATTGGAAG
[Btn]AGCGTATATACTTGCTCGCAGTGCCGCGTCCCTCATTTTCTGGATTTTGCTCGCCGCTGCTTGCAGCGTAAACAACGCACCCTTCGGTTG
[Btn]TAGGGCCTCTAGGCCGCTATCAGCTTTCATGGCATAGTGGTTGGCGACTATAACGGCTGCCTTGGCCCTGTTGGTGCCGTGATTTATTTC
[Btn]TAGAAGGAGATTTAAGTATTCGTCTATTCTTCCTTTTAGGTAGCTCGCTGTTGCAGTAGCTGTTACCTCTTGGCTGCTTAACGTTTGTTT
[Btn]AACGCCTCCGATGGTGCCGCCGGCCTTCGTTACCGTGTTTGTTCCGCTGGTGTCCATCATGCAGCCGCTGGTGCCGCTCTCCTTTGTTTG
[Btn]TTGTCGTGTTAGGCCTACGTAGCCCGCTTTACCTAGGTAGGTCGCTGCGGGTCGCTTCGGCTGTATCGGCGACAACTGCAGCTTGCAAGG
[Btn]CTGGCCGCTTTTGCCGAGGCCGTTGGTGTTGTGCCCACTGGCTAGCCTGCATTCGGCGTCGTTATCGTGGAAATTGTTGGCTGCATCTGC
[Btn]CTGTAATGCATCGAGCGCCTGGACCGTGACGGCTGTTTGGCTGTTCGCTACTGTGACATAGCCGGCCGCCATAGTGACCGCTGCAGAAAG
[Btn]GTTTCTGAACTCAGCGGTTTCTGCTCCTGTTAGCGCTTTCTTGGCCTTCCAGGCGTCGATCCACGGTTGGTGCGCTGCTCCGCTCGCTTC
[Btn]TATTTCTGAGGCCTCTGAGTCTTTTTTCTTTAGTAAAGCTTCTTCAACAAGCTTGGTAACGCCTGTTTTGCCAGCTATTCCGGCTGTTTC
[Btn]TTGCGCCACTGGCTGCTCGGATATGAGCTTTTCTATTGCTGTCCACTGTTCATTTTCGTGGCCGCTAAAGTATTTTTTTAATTCTGTTTG
[Btn]TTCCATTCGGTAATAGGCAAGTATAGTCGTTAACTTGGCATTGCCCTCCAGTTCCCCTAGCTTGGTTGGCTGGTTGTCGCCTACCAGGTT
[Btn]CTTGTTGCAGCTGCCTTCTGTTTCTGCTGCTTGTTGTTGGCTTTCAGCGGGCTTGTGCTTCTGGGTTAAAACTTCAAATTTCCCTGCTGT
[Btn]CTTTTTTGCCTCCTCCTTATCCAATGTGCACTTTTTGTTTTCCGCATCGTTATGCCATTTGCATGGGGATTTGCACTCATTTTGGTCCTT
[Btn]AAGAGGGGTCTTGCTAATGACAAAAGAATTGCTGCTTCCTGTGGTGTTTGTGTTTCCAGTTTTCCCATCTTTTGCAGTCTCATCTGCTAC
[Btn]TATATCAAAAAGTTTTCAAGTAGCAAGGAAAATTTTAAAAGGAGGGGGGAAATTTGAGGGGGGAAATTAAAAAAGCAAAACTGCAAGCCA
