# Supplementary material for: Functional insights from a surface antigen mRNA-bound proteome
Source: eLife. 2021 Mar 30;10:e68136. doi: 10.7554/eLife.68136 (PMC8051951; doi:10.7554/eLife.68136)
Supplement: Supplementary file 2. — The legend is on the first sheet. [file elife-68136-supp2.xlsx]

## Sheet: Legend
Mass spectrometry results for 3 purifications of VSG and alpha tubulin mRNAs	Colour codes
Each replicate contained four independent purifications, two with VSG pull-down first, and two with tubulin first.
Sheet 1: Proteins that were specifically VSG-mRNA-associated by various criteria. These are: FDR<0.05, or FDR<0.01, or Padj <0.05, where there were at least 2 peptides in every VSG purification and none in any tubulin purification. various other publiched resultsare also induicated. ND=not detected, NA= not applicable.
Sheet 2: PERSEUS analysis, significance threshold FDR 1% cconsidering only proteins with with three valid measurements for either VSG or tubulin	FDR<1%
Sheet 3: PERSEUS analysis, significance threshold FDR 5%	FDR<5% s0+0.1 VSG > TUB
	FDR<5% s0+0.1 VSG < TUB
	-log P-value < 0.05, VSG > 2xTUB
	-log P-value < 0.05, TUB > 2xVSG
Sheet 4: DeSeq2 analysis, significance threshold Padj<0.05	Padj<0.01, log2 fold change >2
	Padj<0.05, log2 fold-change>2
Sheet 5 raw data

## Sheet: 1. VSG-associated
PERSEUS FDR<0.01,3 valid measurements	PERSEUS FDR<0.05	DeSeq2 Padj<0.01	At least 2 peptides in all 3 VSG, none with tubulin	GeneID	Annotation	Category	Location, comments	MKT1 complex interaction	Tethered protein effect (bloodstream)	Direct mRNA binding FDR (bloodstream)	Urbaniak Protein BS/PC	Dejung Protein BS/PC	High-confidence enrichment in PABP1 pulldown (procyclic)	High-confidence enrichment in PABP2 pulldown (procyclic)
+	+	+	+	Tb927.1.4650	cyclin-like F-box protein (CFB2)	Ubiquitin.proteasome	Cytoplasm; interacts with MKT1; essential in bloodstream form	MKT1 2-hybrid, MKT1 & XAC1-TAP; YRHDPY	none	0.00172	5.82	5.512	NA	NA
+	+	+	+	Tb927.9.9450	ZC3H28	RNA.binding	Cytoplasm. RNAi screen: essential	XAC1-TAP, (Q)n	Activation	0.03292	0.58	0.443	1.16	5.99
+	+	+	+	Tb927.10.14710	40S ribosomal protein S2	Ribosome	Cytoplasm		none	0.0355	ND	0.872	NA	NA
+	+	+	+	Tb927.8.1290	Unknown function, conserved in Trypanosoma	ZUnknown	Cytoplasm, copurifies with ZC3H32. RNAi screen: no effect	MKT1 2-hybrid; has MQHNPY	none	0.05481	1.93	8.046	NA	NA
+	+	+		Tb927.10.14150	ERBP1	Vesicular.transport	Endoplasmic reticulum		Activation	7e-05	2.34	1.816	NA	NA
+	+	+		Tb927.11.14190	Tudor domain containing protein	ZUnknown	Cytoplasm. Tudor domains recogise methyl lysine and methyl arginine; Driosophila Tudor-SN binds to hyper-edited double-stranded RNA and promotes its cleavage; other homologues bind to ssDNA via Tudor domains. Not part of trypanosome RISC complex.		none	0.00068	1.75	1.497	NA	NA
+	+	+		Tb927.6.4770	MKT1	RNA.degradation	Cytoplasm	NA	Activation	0.00268	1.54	1.514	NA	NA
+	+	+		Tb927.10.6050	clathrin heavy chain (CHC)	Vesicular.transport	Cytoplasm		none	0.00964	5.16	1.865	NA	NA
+	+		+	Tb927.8.4540	PBP1	RNA.degradation	Cytoplasm	Part of complex	Activation	0.00021	1.05	1.329	1.61	6.35
+	+		+	Tb927.5.1210	short-chain dehydrogenase, putative	Enzyme	Sequence similar to beta-hydroxysteroid dehydrogenase, has signal peptide, C-terminally tagged locates to endoplasmic reticulum.		none	0.07922	1.29	0.121	NA	NA
+	+			Tb927.9.4680	eIF4A1	Translation	Cytoplasm	XAC1-TAP	none	0.00032	0.7	0.715	NA	NA
+	+			Tb927.11.1980	ZC3H41	RNA.binding	Cytoplasm. RNAi screen: loss deleterious especially in differentiation		none	0.00084	0.52	0.649	12.39	5.07
+	+			Tb927.4.2040	ALBA3	RNA.binding	Cytoplasm or spots, pattern affected by tag position		none	0.00092	0.92	1.082	4.58	2.9
+	+			Tb927.9.6070	40S ribosomal protein S3	Ribosome	Cytoplasm		none	0.00102	0.89	1.077	NA	NA
+	+			Tb927.3.1590	mitochondrial RNA binding complex 1 subunit (MRB1590)	Mito.RNA	Tagged protein is cytoplasmic independent of tag position		none	0.00152	0.8	0.548	NA	NA
+	+			Tb927.8.1500	hypothetical protein, conserved	ZUnknown	Unknown location. Also in ZC3H5 purification but might be unspecific		none	0.00187	0.65	0.612	NA	NA
+	+			Tb927.4.1300	amidinotransferase, putative	ZUnknown	Cortical cytoskeleton		none	0.03595	1.05	0.907	NA	NA
+	+			Tb927.3.4070	pyruvate transporter PT1	Transporter	Plasma membrane		none	0.08229	12.05	4.274	NA	NA
+			+	Tb927.10.10850	AGO1	RNA.degradation	Cytoplasm		none	0.0027	1.3	0.637	NA	NA
		+	+	Tb927.10.1490	MKT1L	RNA.degradation	Cytoplasm	May associate via PBP1	Activation	0.01397	0.83	0.373	NA	NA
		+	+	Tb927.3.2600	ATP-dependent DEAD/H RNA helicase	RNA.helicase	Cytoplasm, no clear yeast homologue	MKT1 2-hybrid & TAP	none	0.04662	0.72	0.334	NA	NA
		+		Tb927.9.12510	DED1-2, ATP-dependent DEAD/H RNA helicase, DED1-2	Translation	na		none	0.00065	0.6	0.645	NA	NA
		+		Tb927.10.4570	EF2 elongation factor 2	Translation	Cytoplasm		none	0.00065	0.78	0.557	NA	NA
		+		Tb927.10.14890	C-terminal motor kinesin KIFC1	Cytoskeleton	N-terminal GFP: anterior of pellicular membrane. Link to suramin resistance		none	0.03409	38.1	10.411	NA	NA
		+		Tb927.3.3270	ATP-dependent phosphofructokinase (TbPFK)	Glucose.glycerol	Glycosome		none	0.03549	12.42	2.548	NA	NA
		+		Tb927.10.10960	heat shock protein 83, HSP83	Chaperone	Cytoplasm		none	0.06267	1.35	1.585	NA	NA
		+		Tb927.9.10770	PABP2	Translation	Cytoplasm	XAC1-TAP	Activation	0.11529	0.83	0.798	4.77	35.46
		+		Tb927.10.5620	fructose-bisphosphate aldolase, glycosomal (ALD)	Glucose.glycerol	Glycosome		none	0.18066	7.67	3.179	NA	NA
		+		Tb927.9.12630	glycerol kinase, glycosomal (glk1)	Glucose.glycerol	Glycosome		none	0.22562	2.98	1.868	NA	NA
			+	Tb927.8.4500	eIF4G5	Translation	Cytoplasm; interacts with EIF4E6	2-hybrid, MKT1-TAP	Activation	0.00032	1.23	0.793	NA	NA
			+	Tb927.10.5250	ZC3H32	RNA.binding	Cytoplasm, essential. No specifically bound mRNAs found.	2-hybrid, XAC1- & MKT1-TAP; HTNNPY	Suppression	0.001	17.33	31.739	NA	NA
			+	Tb927.11.12880	POMP17	ZUnknown	Flagellar attachment zone and cytoplasm		none	0.00241	0.34	ND	NA	NA
			+	Tb927.11.6160	ERF3 eukaryotic release factor 3, putative	Translation	Cytoplasm		Activation	0.00296	0.62	0.587	NA	NA
			+	Tb927.10.3940	40S ribosomal protein S3A	Ribosome	Cytoplasm		none	0.0081	0.86	0.669	NA	NA
			+	Tb927.7.6090	eIF3a	Translation	Cytoplasm		none	0.0142	0.78	0.655	NA	NA
			+	Tb927.5.900	oligosaccharyl transferase subunit	Glycans	Endoplasmic reticulum		none	0.02501	1.49	1.537	NA	NA
			+	Tb927.9.12650	ubiquitin-activating enzyme e1, putative (UBA2)	Ubiquitin.proteasome	Cytoplasm with C-terminal tag; nucleus with N-terminal tag		none	0.05535	4.03	1.56	NA	NA
			+	Tb927.5.890	oligosaccharyl transferase subunit	Glycans	Endoplasmic reticulum		none	0.11359	10.01	48.638	NA	NA
			+	Tb927.11.10560	eIF4G4	Translation	Cytoplasm; interacts with EIF4E3, which was not detected in any of the pull-downs.		Activation	0.15746	0.5	0.342	NA	NA
			+	Tb927.4.1800	Mitochondrial ribosomal protein L3	Mito.translation	Mitochondrion		none	0.20973	ND	0.831	NA	NA
			+	Tb927.8.1870	Golgi/lysosome glycoprotein 1 (tGLP1)	Vesicular.transport	Endocytic		none	ND	3.9	1.672	NA	NA
			+	Tb927.11.3250	dynein heavy chain	Cytoskeleton	Flagellum		none	ND	1.27	1.05	NA	NA
			+	Tb927.8.7100	acetyl-CoA carboxylase, putative	Lipids	Cytoplasmic spots		none	ND	0.91	0.258	NA	NA
										FDR < 0.01	ratio >2	ratio >2	ratio >2	ratio >2
										FDR < 0.05		ND= not detected		NA= not applicable
										ND= not detected

## Sheet: 2. PERSEUS FDR 1%
FDR <1%	P<0.05	GeneID	Annotation	Category	-LOG(P-value)	Difference	Peptides	Razor + unique peptides	Unique peptides	Sequence coverage [%]	Unique + razor sequence coverage [%]	Unique sequence coverage [%]	Mol. weight [kDa]	Sequence coverage TUB1 [%]	Sequence coverage TUB2 [%]	Sequence coverage TUB3 [%]	Sequence coverage VSG1 [%]	Sequence coverage VSG2 [%]	Sequence coverage VSG3 [%]	Q-value	Score	Intensity	MS/MS count	LFQ intensity TUB1	LFQ intensity TUB2	LFQ intensity TUB3	LFQ intensity VSG1	LFQ intensity VSG2	LFQ intensity VSG3	Protein IDs	Majority protein IDs	id	Fasta headers
+	+	Tb927.5.1210	short-chain dehydrogenase, putative	Enzyme	2.4482	3.45211	13	13	13	49.8	49.8	49.8	33.876	0	0	0	9.6	41.2	24.1	0	90.125	3041700000	29	20.341	18.6274	20.2254	23.1962	23.351	23.003	Tb927.5.1210:mRNA-p1	Tb927.5.1210:mRNA-p1	663	Tb927.5.1210:mRNA-p1 | transcript=Tb927.5.1210:mRNA | gene=Tb927.5.1210 | organism=Trypanosoma_brucei_brucei_TREU927 | gene_product=short-chain dehydrogenase, putative | transcript_product=short-chain dehydrogenase, putative | location=Tb927_05_v5.1:462078
+	+	Tb927.3.1590	mitochondrial RNA binding complex 1 subunit (MRB1590)	Mito.RNA	3.09837	2.07091	13	13	13	26.8	26.8	26.8	72.678	1.3	0	0	14.1	16.8	13.2	0	152.71	823060000	27	19.9649	19.3936	19.5316	21.9729	21.6643	21.4655	Tb927.3.1590:mRNA-p1	Tb927.3.1590:mRNA-p1	549	Tb927.3.1590:mRNA-p1 | transcript=Tb927.3.1590:mRNA | gene=Tb927.3.1590 | organism=Trypanosoma_brucei_brucei_TREU927 | gene_product=mitochondrial RNA binding complex 1 subunit | transcript_product=mitochondrial RNA binding complex 1 subunit | location=Tb92
+	+	Tb927.3.4790	aminopeptidase, putative,metallo-peptidase, Clan MA(E) Family M1	Protease	2.0922	1.9374	12	12	12	14.7	14.7	14.7	97.251	0	0	0	1.4	12.7	6.9	0	49.75	756630000	21	19.7402	18.6802	19.1319	20.6393	21.2482	21.477	Tb927.3.4790:mRNA-p1;Tb927.3.4750:mRNA-p1	Tb927.3.4790:mRNA-p1;Tb927.3.4750:mRNA-p1	581	Tb927.3.4790:mRNA-p1 | transcript=Tb927.3.4790:mRNA | gene=Tb927.3.4790 | organism=Trypanosoma_brucei_brucei_TREU927 | gene_product=Aminopeptidase M1, putative | transcript_product=Aminopeptidase M1, putative | location=Tb927_03_v5.1:1349765-1352380(-) | p
+	+	Tb927.9.6070	40S ribosomal protein S3	Ribosome	2.01269	3.30062	22	22	22	78	78	78	24.216	16.8	26.2	21	35.5	78	58.9	0	179.2	14866000000	116	22.4758	21.2367	23.6076	25.8807	25.9788	25.3624	Tb927.9.6070:mRNA-p1;Tb927.10.11540:mRNA-p1	Tb927.9.6070:mRNA-p1;Tb927.10.11540:mRNA-p1	170	Tb927.9.6070:mRNA-p1 | transcript=Tb927.9.6070:mRNA | gene=Tb927.9.6070 | organism=Trypanosoma_brucei_brucei_TREU927 | gene_product=40S ribosomal protein S3, putative | transcript_product=40S ribosomal protein S3, putative | location=Tb927_09_v5.1:1008372-
+	+	Tb927.10.14710	40S ribosomal protein S2	Ribosome	2.4836	4.49393	22	22	22	68	68	68	28.642	0	0	0	19.2	65.4	50.4	0	184.27	6757700000	74	20.5585	18.2861	19.5136	23.4817	24.463	23.8953	Tb927.10.14710:mRNA-p1;Tb927.10.14600:mRNA-p1	Tb927.10.14710:mRNA-p1;Tb927.10.14600:mRNA-p1	214	Tb927.10.14710:mRNA-p1 | transcript=Tb927.10.14710:mRNA | gene=Tb927.10.14710 | organism=Trypanosoma_brucei_brucei_TREU927 | gene_product=40S ribosomal protein S2, putative | transcript_product=40S ribosomal protein S2, putative | location=Tb927_10_v5.1:35
+	+	Tb927.11.13007	60S ribosomal protein L40-ubiquitin	Ribosome	2.00943	2.29965	5	5	5	36.7	36.7	36.7	14.656	0	7	0	14.1	36.7	36.7	0	105.42	1984700000	19	19.9861	19.2589	20.1982	21.6482	22.9246	21.7694	Tb927.11.13007:mRNA-p1;Tb927.11.13003:mRNA-p1;Tb11.v5.0537.1-p1;Tb927.11.9920:mRNA-p1;Tb11.01.1680.v5.1-p1	Tb927.11.13007:mRNA-p1;Tb927.11.13003:mRNA-p1;Tb11.v5.0537.1-p1;Tb927.11.9920:mRNA-p1;Tb11.01.1680.v5.1-p1	60	Tb927.11.13007:mRNA-p1 | transcript=Tb927.11.13007:mRNA | gene=Tb927.11.13007 | organism=Trypanosoma_brucei_brucei_TREU927 | gene_product=ubiquitin-60S ribosomal protein L40 | transcript_product=ubiquitin-60S ribosomal protein L40 | location=Tb927_11_v5.1:
+	+	Tb927.11.1980	ZC3H41	RNA.binding	2.09652	2.25764	41	41	41	65.2	65.2	65.2	58.459	20.3	26.3	8.7	30.8	62.9	47.2	0	323.31	29780000000	204	25.4538	24.0171	24.1788	26.7818	26.9444	26.6964	Tb927.11.1980:mRNA-p1	Tb927.11.1980:mRNA-p1	409	Tb927.11.1980:mRNA-p1 | transcript=Tb927.11.1980:mRNA | gene=Tb927.11.1980 | organism=Trypanosoma_brucei_brucei_TREU927 | gene_product=zinc finger protein family member, putative | transcript_product=zinc finger protein family member, putative | location=T
+	+	Tb927.4.2040	ALBA3	RNA.binding	2.39333	4.67936	15	15	7	51.6	51.6	23.2	20.808	0	24.2	5.8	33.2	46.8	47.9	0	301.37	11052000000	58	20.5635	21.5016	19.2676	24.2386	25.4256	25.7066	Tb927.4.2040:mRNA-p1	Tb927.4.2040:mRNA-p1	619	Tb927.4.2040:mRNA-p1 | transcript=Tb927.4.2040:mRNA | gene=Tb927.4.2040 | organism=Trypanosoma_brucei_brucei_TREU927 | gene_product=DNA/RNA-binding protein Alba 3 | transcript_product=DNA/RNA-binding protein Alba 3 | location=Tb927_04_v5.1:512689-513261(-)
+	+	Tb927.9.9450	ZC3H28	RNA.binding	2.83415	2.53584	21	21	20	25	25	23.7	114.75	0	0	0	8.6	19.5	9.1	0	131.75	1818200000	49	20.4653	19.7996	20.4264	22.7936	23.1742	22.331	Tb927.9.9450:mRNA-p1	Tb927.9.9450:mRNA-p1	951	Tb927.9.9450:mRNA-p1 | transcript=Tb927.9.9450:mRNA | gene=Tb927.9.9450 | organism=Trypanosoma_brucei_brucei_TREU927 | gene_product=zinc finger protein family member, putative | transcript_product=zinc finger protein family member, putative | location=Tb92
+	+	Tb927.6.4770	MKT1	RNA.degradation	2.51035	5.12257	33	33	33	48.3	48.3	48.3	83.306	1.2	0	0	28.6	44.4	15.9	0	240.83	6725300000	104	20.209	18.1595	20.776	24.6425	24.8458	25.0239	Tb927.6.4770:mRNA-p1	Tb927.6.4770:mRNA-p1	735	Tb927.6.4770:mRNA-p1 | transcript=Tb927.6.4770:mRNA | gene=Tb927.6.4770 | organism=Trypanosoma_brucei_brucei_TREU927 | gene_product=protein mkt1, putative | transcript_product=protein mkt1, putative | location=Tb927_06_v5.1:1328290-1330497(+) | protein_len
+	+	Tb927.8.4540	PBP1	RNA.degradation	3.3871	3.29707	13	13	13	31.8	31.8	31.8	59.599	0	0	0	13.5	26.5	13.3	0	92.094	1870200000	32	19.9747	19.2623	19.2134	22.4583	22.8085	23.0749	Tb927.8.4540:mRNA-p1	Tb927.8.4540:mRNA-p1	842	Tb927.8.4540:mRNA-p1 | transcript=Tb927.8.4540:mRNA | gene=Tb927.8.4540 | organism=Trypanosoma_brucei_brucei_TREU927 | gene_product=PAB1-binding protein , putative | transcript_product=PAB1-binding protein , putative | location=Tb927_08_v5.1:1347029-134868
+	+	Tb927.10.10850	AGO1	RNA.degradation	2.37101	2.6453	21	21	21	27.4	27.4	27.4	99.184	0	0	0	4.8	18.1	12.6	0	57.04	1589600000	25	19.5505	19.0088	18.8674	20.9891	22.2578	22.1157	Tb927.10.10850:mRNA-p1	Tb927.10.10850:mRNA-p1	167	Tb927.10.10850:mRNA-p1 | transcript=Tb927.10.10850:mRNA | gene=Tb927.10.10850 | organism=Trypanosoma_brucei_brucei_TREU927 | gene_product=Protein argonaute-1 | transcript_product=Protein argonaute-1 | location=Tb927_10_v5.1:2635529-2638240(-) | protein_len
+	+	Tb927.9.4680	eIF4A1	Translation	2.54119	4.0547	14	14	14	45.3	45.3	45.3	45.361	0	2.5	1.7	10.1	38.9	26.2	0	103.23	3889700000	52	19.6446	18.7162	19.0548	22.0899	23.9198	23.57	Tb927.9.4680:mRNA-p1	Tb927.9.4680:mRNA-p1	927	Tb927.9.4680:mRNA-p1 | transcript=Tb927.9.4680:mRNA | gene=Tb927.9.4680 | organism=Trypanosoma_brucei_brucei_TREU927 | gene_product=Eukaryotic initiation factor 4A-1 | transcript_product=Eukaryotic initiation factor 4A-1 | location=Tb927_09_v5.1:864680-865
+	+	Tb927.3.4070	pyruvate transporter PT1	Transporter	2.51254	3.85812	11	11	11	13.9	13.9	13.9	65.502	1.5	0	0	3	12.6	9.9	0	79.223	3220500000	39	20.0619	18.336	18.843	22.414	23.5157	22.8856	Tb927.3.4070:mRNA-p1;Tb927.3.4080:mRNA-p1;Tb927.3.4100:mRNA-p1;Tb927.3.4090:mRNA-p1;Tb927.3.4110:mRNA-p1	Tb927.3.4070:mRNA-p1;Tb927.3.4080:mRNA-p1;Tb927.3.4100:mRNA-p1;Tb927.3.4090:mRNA-p1;Tb927.3.4110:mRNA-p1	578	Tb927.3.4070:mRNA-p1 | transcript=Tb927.3.4070:mRNA | gene=Tb927.3.4070 | organism=Trypanosoma_brucei_brucei_TREU927 | gene_product=Pyruvate transporter, putative | transcript_product=Pyruvate transporter, putative | location=Tb927_03_v5.1:1148265-1150052(
+	+	Tb927.1.4650	cyclin-like F-box protein (CFB2)	Ubiquitin.proteasome	2.58031	3.99889	18	18	18	43.9	43.9	43.9	52.284	0	0	0	17.9	42.2	25.8	0	104.81	6733100000	78	20.9442	19.6912	19.7912	24.3619	24.7774	23.284	Tb927.1.4650:mRNA-p1;Tb927.1.4600:mRNA-p1;Tb927.1.4560:mRNA-p1;Tb927.1.4630:mRNA-p1;Tb927.1.4580:mRNA-p1;Tb927.1.4540:mRNA-p1;Tb11.v5.0705.1-p1	Tb927.1.4650:mRNA-p1	155	Tb927.1.4650:mRNA-p1 | transcript=Tb927.1.4650:mRNA | gene=Tb927.1.4650 | organism=Trypanosoma_brucei_brucei_TREU927 | gene_product=cyclin-like F-box protein 2 | transcript_product=cyclin-like F-box protein 2 | location=Tb927_01_v5.1:954904-956334(+) | pro
+	+	Tb927.10.14150	ERBP1	Vesicular.transport	2.2367	5.87447	54	54	54	69.7	69.7	69.7	55.311	0	21.3	5	35.7	68.9	52	0	323.31	45856000000	237	20.2356	23.8989	21.9064	28.423	27.5264	27.7149	Tb927.10.14150:mRNA-p1;Tb11.v5.0606.1-p1	Tb927.10.14150:mRNA-p1	205	Tb927.10.14150:mRNA-p1 | transcript=Tb927.10.14150:mRNA | gene=Tb927.10.14150 | organism=Trypanosoma_brucei_brucei_TREU927 | gene_product=nuclear segregation protein, putative | transcript_product=nuclear segregation protein, putative | location=Tb927_10_v
+	+	Tb927.10.6050	clathrin heavy chain (CHC)	Vesicular.transport	3.1078	5.2011	70	70	70	49	49	49	190.62	2.5	2.1	0.5	20.4	43.2	25.2	0	323.31	8435900000	162	20.4895	18.5722	19.3848	24.4961	24.8741	24.6796	Tb927.10.6050:mRNA-p1;Tb11.v5.0198.1-p1;Tb11.v5.0197.1-p1	Tb927.10.6050:mRNA-p1;Tb11.v5.0198.1-p1	285	Tb927.10.6050:mRNA-p1 | transcript=Tb927.10.6050:mRNA | gene=Tb927.10.6050 | organism=Trypanosoma_brucei_brucei_TREU927 | gene_product=clathrin heavy chain | transcript_product=clathrin heavy chain | location=Tb927_10_v5.1:1521439-1526550(-) | protein_leng
+	+	Tb927.11.14190	Staphylococcal nuclease homologue/Tudor domain containing protein, putative	ZUnknown	2.23144	4.17472	49	49	49	54.3	54.3	54.3	100.47	13	10	1.8	42	40.7	40.6	0	323.31	18052000000	211	23.4525	20.9577	21.3601	26.2273	25.9022	26.1648	Tb927.11.14190:mRNA-p1	Tb927.11.14190:mRNA-p1	371	Tb927.11.14190:mRNA-p1 | transcript=Tb927.11.14190:mRNA | gene=Tb927.11.14190 | organism=Trypanosoma_brucei_brucei_TREU927 | gene_product=Staphylococcal nuclease homologue/Tudor domain containing protein, putative | transcript_product=Staphylococcal nuclea
+	+	Tb927.4.1300	amidinotransferase, putative	ZUnknown	2.54424	3.89697	21	21	21	58.6	58.6	58.6	42.015	2.7	10.2	2.7	5.6	50.5	34.8	0	323.31	5060300000	53	19.9862	19.6563	19.4908	22.5098	24.4785	23.836	Tb927.4.1300:mRNA-p1	Tb927.4.1300:mRNA-p1	608	Tb927.4.1300:mRNA-p1 | transcript=Tb927.4.1300:mRNA | gene=Tb927.4.1300 | organism=Trypanosoma_brucei_brucei_TREU927 | gene_product=amidinotransferase, putative | transcript_product=amidinotransferase, putative | location=Tb927_04_v5.1:341652-342776(-) | p
+	+	Tb927.8.1500	hypothetical protein, conserved, copurifies with MKT1	ZUnknown	3.94534	2.8212	9	9	9	22.6	22.6	22.6	63.206	0	1.8	5.2	14.3	21.1	14.1	0	89.611	1555500000	32	20.0067	19.6587	19.5819	22.8138	22.3505	22.5467	Tb927.8.1500:mRNA-p1	Tb927.8.1500:mRNA-p1	808	Tb927.8.1500:mRNA-p1 | transcript=Tb927.8.1500:mRNA | gene=Tb927.8.1500 | organism=Trypanosoma_brucei_brucei_TREU927 | gene_product=hypothetical protein, conserved | transcript_product=hypothetical protein, conserved | location=Tb927_08_v5.1:487358-489163(
+	+	Tb927.8.1290	SUMO-interaction motif protein, copurifies with ZC3H32	ZUnknown	1.986	3.42624	30	30	30	32.5	32.5	32.5	120.05	0	0	0	17.5	26.9	7.6	0	138.72	2692500000	75	21.0828	19.5999	19.4488	24.1991	23.7975	22.4137	Tb927.8.1290:mRNA-p1	Tb927.8.1290:mRNA-p1	806	Tb927.8.1290:mRNA-p1 | transcript=Tb927.8.1290:mRNA | gene=Tb927.8.1290 | organism=Trypanosoma_brucei_brucei_TREU927 | gene_product=SUMO-interacting motif-containing protein | transcript_product=SUMO-interacting motif-containing protein | location=Tb927_08
	+	Tb927.11.17000	AIR9	Cell.cycle	1.58245	3.8303	30	30	30	36	36	36	109.72	3.1	3.4	0	7.3	30.3	20.6	0	258.77	5274100000	78	22.0841	18.3784	19.6471	23.433	23.9465	24.221	Tb927.11.17000:mRNA-p1;Tb11.v5.0404.1-p1	Tb927.11.17000:mRNA-p1;Tb11.v5.0404.1-p1	406	Tb927.11.17000:mRNA-p1 | transcript=Tb927.11.17000:mRNA | gene=Tb927.11.17000 | organism=Trypanosoma_brucei_brucei_TREU927 | gene_product=AIR9-like protein | transcript_product=AIR9-like protein | location=Tb927_11_v5.1:4532213-4535212(-) | protein_length=
	+	Tb927.10.10960	heat shock protein 83, HSP83	Chaperone	1.55701	3.44627	32	32	32	41.6	41.6	41.6	80.763	2	4.1	4.4	7.1	36.9	36.4	0	323.31	7159900000	93	19.9206	20.0462	21.7573	22.8525	23.5863	25.6241	Tb927.10.10960:mRNA-p1;Tb927.10.10950:mRNA-p1;Tb927.10.10940:mRNA-p1;Tb927.10.10920:mRNA-p1;Tb927.10.10910:mRNA-p1;Tb927.10.10900:mRNA-p1;Tb927.10.10890:mRNA-p1;Tb11.v5.0543.1-p1;Tb927.10.10980:mRNA-p1;Tb927.10.10970:mRNA-p1;Tb927.10.10930:mRNA-p1	Tb927.10.10960:mRNA-p1;Tb927.10.10950:mRNA-p1;Tb927.10.10940:mRNA-p1;Tb927.10.10920:mRNA-p1;Tb927.10.10910:mRNA-p1;Tb927.10.10900:mRNA-p1;Tb927.10.10890:mRNA-p1;Tb11.v5.0543.1-p1;Tb927.10.10980:mRNA-p1;Tb927.10.10970:mRNA-p1;Tb927.10.10930:mRNA-p1	97	Tb927.10.10960:mRNA-p1 | transcript=Tb927.10.10960:mRNA | gene=Tb927.10.10960 | organism=Trypanosoma_brucei_brucei_TREU927 | gene_product=heat shock protein, putative | transcript_product=heat shock protein, putative | location=Tb927_10_v5.1:2674479-267659
	+	Tb927.1.2400	alpha tubulin	Cytoskeleton	1.46378	3.66746	25	25	25	68.5	68.5	68.5	49.787	3.3	23.7	3.3	11.3	56.5	32.6	0	323.31	9170200000	80	20.2345	21.8366	19.5351	22.3274	24.9809	25.3002	Tb927.1.2400:mRNA-p1;Tb927.1.2380:mRNA-p1;Tb927.1.2360:mRNA-p1;Tb927.1.2340:mRNA-p1;Tb11.v5.0468.1-p1	Tb927.1.2400:mRNA-p1;Tb927.1.2380:mRNA-p1;Tb927.1.2360:mRNA-p1;Tb927.1.2340:mRNA-p1;Tb11.v5.0468.1-p1	141	Tb927.1.2400:mRNA-p1 | transcript=Tb927.1.2400:mRNA | gene=Tb927.1.2400 | organism=Trypanosoma_brucei_brucei_TREU927 | gene_product=alpha tubulin | transcript_product=alpha tubulin | location=Tb927_01_v5.1:583368-584723(+) | protein_length=451 | sequence_S
	+	Tb927.10.1170	intraflagellar transport protein IFT172	Cytoskeleton	1.63909	2.68817	18	18	18	13.9	13.9	13.9	196.6	2	0	0.9	6.5	9.1	5.6	0	131.17	1031000000	36	20.2384	17.7181	19.0133	21.4764	22.0298	21.5281	Tb927.10.1170:mRNA-p1;Tb11.0560:mRNA-p1;Tb11.v5.0858.1-p1	Tb927.10.1170:mRNA-p1;Tb11.0560:mRNA-p1	171	Tb927.10.1170:mRNA-p1 | transcript=Tb927.10.1170:mRNA | gene=Tb927.10.1170 | organism=Trypanosoma_brucei_brucei_TREU927 | gene_product=intraflagellar transport protein 172 | transcript_product=intraflagellar transport protein 172 | location=Tb927_10_v5.1:3
	+	Tb927.6.4980	40S ribosomal protein S14	Ribosome	1.738	1.18442	10	10	10	49.3	49.3	49.3	15.513	19.4	26.4	18.8	19.4	49.3	42.4	0	82.309	3786600000	43	22.9464	22.098	22.8878	23.5684	23.8664	24.0507	Tb927.6.4980:mRNA-p1;Tb927.11.7705:mRNA-p1;Tb11.0390:mRNA-p1;Tb11.0290:mRNA-p1	Tb927.6.4980:mRNA-p1;Tb927.11.7705:mRNA-p1;Tb11.0390:mRNA-p1;Tb11.0290:mRNA-p1	61	Tb927.6.4980:mRNA-p1 | transcript=Tb927.6.4980:mRNA | gene=Tb927.6.4980 | organism=Trypanosoma_brucei_brucei_TREU927 | gene_product=40S ribosomal protein S14 | transcript_product=40S ribosomal protein S14 | location=Tb927_06_v5.1:1370239-1370673(+) | prote
	+	Tb927.10.560	40S ribosomal protein S11	Ribosome	1.46718	4.63396	11	11	2	55.2	55.2	12.1	20.087	5.2	0	0	26.4	55.2	25.3	0	77.271	4597300000	28	20.6712	17.3118	20.016	24.7109	25.2847	21.9053	Tb927.10.560:mRNA-p1	Tb927.10.560:mRNA-p1	279	Tb927.10.560:mRNA-p1 | transcript=Tb927.10.560:mRNA | gene=Tb927.10.560 | organism=Trypanosoma_brucei_brucei_TREU927 | gene_product=40S ribosomal proteins S11, putative | transcript_product=40S ribosomal proteins S11, putative | location=Tb927_10_v5.1:1471
	+	Tb927.9.3990	40S ribosomal protein S7	Ribosome	1.55056	3.33127	11	11	11	51.5	51.5	51.5	23.841	5.9	0	0	22.8	51.5	12.9	0	48.171	1947600000	22	20.3562	18.5539	19.5505	23.3429	23.9403	21.1713	Tb927.9.3990:mRNA-p1;Tb927.9.3920:mRNA-p1	Tb927.9.3990:mRNA-p1;Tb927.9.3920:mRNA-p1	921	Tb927.9.3990:mRNA-p1 | transcript=Tb927.9.3990:mRNA | gene=Tb927.9.3990 | organism=Trypanosoma_brucei_brucei_TREU927 | gene_product=ribosomal protein S7, putative | transcript_product=ribosomal protein S7, putative | location=Tb927_09_v5.1:771263-771871(+)
	+	Tb927.6.4440	RBP42	RNA.binding	1.87654	-1.61942	16	16	16	51.4	51.4	51.4	37.718	23.6	36.4	23.3	21	47.4	35.2	0	323.31	13138000000	96	25.9005	26.5779	26.3901	24.0231	25.0369	24.9502	Tb927.6.4440:mRNA-p1	Tb927.6.4440:mRNA-p1	731	Tb927.6.4440:mRNA-p1 | transcript=Tb927.6.4440:mRNA | gene=Tb927.6.4440 | organism=Trypanosoma_brucei_brucei_TREU927 | gene_product=RNA-binding protein 42 (RNA-binding motif protein 42) | transcript_product=RNA-binding protein 42 (RNA-binding motif protein
	+	Tb927.11.530	RBP3	RNA.binding	1.80167	-3.10559	9	9	9	54.5	54.5	54.5	22.331	12	43.5	23	0	5.5	14.5	0	58.532	542170000	19	22.3509	24.0753	23.9817	19.3068	20.9766	20.8077	Tb927.11.530:mRNA-p1	Tb927.11.530:mRNA-p1	455	Tb927.11.530:mRNA-p1 | transcript=Tb927.11.530:mRNA | gene=Tb927.11.530 | organism=Trypanosoma_brucei_brucei_TREU927 | gene_product=RNA-binding protein, putative | transcript_product=RNA-binding protein, putative | location=Tb927_11_v5.1:133925-134527(-) |
	+	Tb927.10.1490	MKT1L	RNA.degradation	1.49752	2.42239	19	19	19	17.8	17.8	17.8	134.81	0	0	0	6.6	13.7	8	0	124.56	1024400000	42	20.1035	18.2532	20.1598	22.2732	22.3995	21.111	Tb927.10.1490:mRNA-p1;Tb11.v5.0875.1-p1	Tb927.10.1490:mRNA-p1	220	Tb927.10.1490:mRNA-p1 | transcript=Tb927.10.1490:mRNA | gene=Tb927.10.1490 | organism=Trypanosoma_brucei_brucei_TREU927 | gene_product=Temperature dependent protein affecting M2 dsRNA replication, putative | transcript_product=Temperature dependent protein
	+	Tb927.3.2600	ATP-dependent DEAD/H RNA helicase, putative, no clear yeast homologue	RNA.helicase	1.69086	3.32791	37	37	37	22.7	22.7	22.7	244.99	0	0	0	8	18.8	5.4	0	159.16	2280000000	70	20.1064	17.4891	19.7245	22.1662	23.1527	21.9848	Tb927.3.2600:mRNA-p1	Tb927.3.2600:mRNA-p1	557	Tb927.3.2600:mRNA-p1 | transcript=Tb927.3.2600:mRNA | gene=Tb927.3.2600 | organism=Trypanosoma_brucei_brucei_TREU927 | gene_product=ATP-dependent DEAD/H RNA helicase, putative | transcript_product=ATP-dependent DEAD/H RNA helicase, putative | location=Tb92
	+	Tb927.9.10770	PABP2	Translation	1.34077	1.93678	62	62	62	76	76	76	62.147	34.2	43.2	23.1	63.1	74.1	69.9	0	323.31	133620000000	585	27.7988	26.75	25.8255	29.0025	29.1727	28.0095	Tb927.9.10770:mRNA-p1	Tb927.9.10770:mRNA-p1	881	Tb927.9.10770:mRNA-p1 | transcript=Tb927.9.10770:mRNA | gene=Tb927.9.10770 | organism=Trypanosoma_brucei_brucei_TREU927 | gene_product=polyadenylate-binding protein 2 | transcript_product=polyadenylate-binding protein 2 | location=Tb927_09_v5.1:1700279-170
	+	Tb927.10.2110	EF1-alpha elongation factor 1-alpha, (TEF1)	Translation	1.49823	1.89747	32	32	32	70.8	70.8	70.8	49.105	12.5	20.7	9.1	19.6	67	45.9	0	323.31	21654000000	143	24.6262	23.0584	24.2748	25.2192	26.0669	26.3657	Tb927.10.2110:mRNA-p1;Tb927.10.2100:mRNA-p1;Tb927.10.2090:mRNA-p1;Tb11.v5.1046.1-p1	Tb927.10.2110:mRNA-p1;Tb927.10.2100:mRNA-p1;Tb927.10.2090:mRNA-p1;Tb11.v5.1046.1-p1	131	Tb927.10.2110:mRNA-p1 | transcript=Tb927.10.2110:mRNA | gene=Tb927.10.2110 | organism=Trypanosoma_brucei_brucei_TREU927 | gene_product=elongation factor 1-alpha | transcript_product=elongation factor 1-alpha | location=Tb927_10_v5.1:549417-550766(+) | prot
	+	Tb927.9.12510	DED1-2, ATP-dependent DEAD/H RNA helicase, DED1-2	Translation	1.41311	3.83421	37	37	36	50.2	50.2	49	82.74	7.2	2.3	0	27.8	33.3	34.6	0	172.98	3227500000	102	21.9823	17.8381	20.2653	24.4791	23.1418	23.9673	Tb927.9.12510:mRNA-p1	Tb927.9.12510:mRNA-p1	893	Tb927.9.12510:mRNA-p1 | transcript=Tb927.9.12510:mRNA | gene=Tb927.9.12510 | organism=Trypanosoma_brucei_brucei_TREU927 | gene_product=ATP-dependent DEAD/H RNA helicase, putative | transcript_product=ATP-dependent DEAD/H RNA helicase, putative | location=T
	+	Tb927.9.12650	ubiquitin-activating enzyme e1, putative (UBA2)	Ubiquitin.proteasome	1.51788	2.42622	18	18	18	17	17	17	134.65	0	0	0	4.2	11	8.2	0	69.609	1165700000	33	20.2881	18.325	19.5217	20.9288	21.956	22.5288	Tb927.9.12650:mRNA-p1;Tb11.v5.0675.1-p1	Tb927.9.12650:mRNA-p1	895	Tb927.9.12650:mRNA-p1 | transcript=Tb927.9.12650:mRNA | gene=Tb927.9.12650 | organism=Trypanosoma_brucei_brucei_TREU927 | gene_product=ubiquitin-activating enzyme E1, putative | transcript_product=ubiquitin-activating enzyme E1, putative | location=Tb927_0
	+	Tb927.7.7460	hypothetical protein, conserved, no domains	ZUnknown	1.43538	1.93492	12	12	12	65.6	65.6	65.6	22.358	4.2	16.1	9.4	15.1	65.6	29.2	0	116.11	3815200000	46	20.4362	21.503	22.2748	22.71	23.8255	23.4833	Tb927.7.7460:mRNA-p1	Tb927.7.7460:mRNA-p1	799	Tb927.7.7460:mRNA-p1 | transcript=Tb927.7.7460:mRNA | gene=Tb927.7.7460 | organism=Trypanosoma_brucei_brucei_TREU927 | gene_product=hypothetical protein, conserved | transcript_product=hypothetical protein, conserved | location=Tb927_07_v5.1:2141703-214228
		Tb927.1.2390	beta tubulin	Cytoskeleton	1.23729	2.83266	15	15	15	33.3	33.3	33.3	49.704	10	0	5	10	28.5	30.1	0	120.87	2562100000	60	21.2719	18.3342	21.1598	22.2863	23.0254	23.9522	Tb927.1.2390:mRNA-p1;Tb927.1.2370:mRNA-p1;Tb927.1.2350:mRNA-p1;Tb927.1.2330:mRNA-p1;Tb11.v5.0469.1-p1;Tb927.1.2410:pseudogenic_transcript-p1	Tb927.1.2390:mRNA-p1;Tb927.1.2370:mRNA-p1;Tb927.1.2350:mRNA-p1;Tb927.1.2330:mRNA-p1;Tb11.v5.0469.1-p1;Tb927.1.2410:pseudogenic_transcript-p1	90	Tb927.1.2390:mRNA-p1 | transcript=Tb927.1.2390:mRNA | gene=Tb927.1.2390 | organism=Trypanosoma_brucei_brucei_TREU927 | gene_product=beta tubulin | transcript_product=beta tubulin | location=Tb927_01_v5.1:581408-582736(+) | protein_length=442 | sequence_SO=
		Tb927.7.3550	WCB	Cytoskeleton	0.791577	1.997	10	10	10	8.7	8.7	8.7	138.16	3.1	0	0	5	5.2	2.9	0	28.972	441710000	22	22.0824	18.4061	20.1564	23.1695	21.7686	21.6978	Tb927.7.3550:mRNA-p1	Tb927.7.3550:mRNA-p1	769	Tb927.7.3550:mRNA-p1 | transcript=Tb927.7.3550:mRNA | gene=Tb927.7.3550 | organism=Trypanosoma_brucei_brucei_TREU927 | gene_product=cytoskeleton associated protein, putative | transcript_product=cytoskeleton associated protein, putative | location=Tb927_07
		Tb927.3.930	OADalpha outer arm dynein heavy chain	Cytoskeleton	0.805905	2.06323	27	27	26	6.8	6.8	6.6	531.41	0.2	0	0	1.9	6.1	1.1	0	74.594	1263600000	39	20.7018	18.149	19.7143	22.4652	22.5473	19.7423	Tb927.3.930:mRNA-p1	Tb927.3.930:mRNA-p1	603	Tb927.3.930:mRNA-p1 | transcript=Tb927.3.930:mRNA | gene=Tb927.3.930 | organism=Trypanosoma_brucei_brucei_TREU927 | gene_product=dynein heavy chain, putative | transcript_product=dynein heavy chain, putative | location=Tb927_03_v5.1:217342-231261(+) | prot
		Tb927.10.6060	UMSBP2 Telomere-binding	DNA	0.153678	0.181543	15	15	14	97.2	97.2	97.2	21.836	70	77.5	83.6	63.8	80.8	82.2	0	285.27	41780000000	278	26.3398	26.693	26.8987	26.3149	26.5245	27.6368	Tb927.10.6060:mRNA-p1;Tb11.v5.0199.1-p1	Tb927.10.6060:mRNA-p1;Tb11.v5.0199.1-p1	70	Tb927.10.6060:mRNA-p1 | transcript=Tb927.10.6060:mRNA | gene=Tb927.10.6060 | organism=Trypanosoma_brucei_brucei_TREU927 | gene_product=universal minicircle sequence binding protein 2 | transcript_product=universal minicircle sequence binding protein 2 | lo
		Tb927.6.4300	glyceraldehyde 3-phosphate dehydrogenase, glycosomal (GAPDH)	Glucose.glycerol	1.08279	3.6268	33	33	31	87.2	87.2	85	39.047	0	18.7	22.6	25.6	85	60.7	0	323.31	33808000000	172	20.4216	22.0437	24.7761	24.1808	26.9336	27.0073	Tb927.6.4300:mRNA-p1;Tb927.6.4280:mRNA-p1	Tb927.6.4300:mRNA-p1;Tb927.6.4280:mRNA-p1	728	Tb927.6.4300:mRNA-p1 | transcript=Tb927.6.4300:mRNA | gene=Tb927.6.4300 | organism=Trypanosoma_brucei_brucei_TREU927 | gene_product=glyceraldehyde 3-phosphate dehydrogenase, glycosomal | transcript_product=glyceraldehyde 3-phosphate dehydrogenase, glycosom
		Tb927.3.3270	ATP-dependent phosphofructokinase (TbPFK)	Glucose.glycerol	1.06541	3.30762	51	51	51	88.3	88.3	88.3	53.517	40.5	15.8	18.5	45	87.7	71.9	0	323.31	35609000000	277	25.3567	20.7444	23.0655	25.1742	27.0464	26.8689	Tb927.3.3270:mRNA-p1	Tb927.3.3270:mRNA-p1	565	Tb927.3.3270:mRNA-p1 | transcript=Tb927.3.3270:mRNA | gene=Tb927.3.3270 | organism=Trypanosoma_brucei_brucei_TREU927 | gene_product=ATP-dependent 6-phosphofructokinase, glycosomal | transcript_product=ATP-dependent 6-phosphofructokinase, glycosomal | locat
		Tb927.10.5620	fructose-bisphosphate aldolase, glycosomal (ALD)	Glucose.glycerol	1.00383	4.12497	34	34	34	77.7	77.7	77.7	41.071	11.3	3.5	9.9	16.4	66.1	68.8	0	323.31	18874000000	125	21.9786	17.9906	23.1188	22.8945	26.0217	26.5467	Tb927.10.5620:mRNA-p1;Tb11.v5.0531.1-p1	Tb927.10.5620:mRNA-p1;Tb11.v5.0531.1-p1	95	Tb927.10.5620:mRNA-p1 | transcript=Tb927.10.5620:mRNA | gene=Tb927.10.5620 | organism=Trypanosoma_brucei_brucei_TREU927 | gene_product=fructose-bisphosphate aldolase, glycosomal | transcript_product=fructose-bisphosphate aldolase, glycosomal | location=Tb9
		Tb927.10.14140	pyruvate kinase 1 (PYK1)	Glucose.glycerol	1.13431	1.7938	34	34	34	86.2	86.2	86.2	54.423	15	22	24.6	22	75.4	70.5	0	323.31	20138000000	187	24.1718	22.8211	24.5696	24.6027	26.173	26.1682	Tb927.10.14140:mRNA-p1;Tb11.v5.0605.1-p1	Tb927.10.14140:mRNA-p1;Tb11.v5.0605.1-p1	204	Tb927.10.14140:mRNA-p1 | transcript=Tb927.10.14140:mRNA | gene=Tb927.10.14140 | organism=Trypanosoma_brucei_brucei_TREU927 | gene_product=pyruvate kinase 1 | transcript_product=pyruvate kinase 1 | location=Tb927_10_v5.1:3434635-3436134(-) | protein_length=
		Tb927.9.12630	glycerol kinase, glycosomal (glk1)	Glucose.glycerol	0.832186	2.9075	31	31	31	70.9	70.9	70.9	56.426	0	0	4.7	9.4	50.4	53.7	0	323.31	5841900000	85	20.4247	18.3653	21.0424	20.4133	22.8662	25.2753	Tb927.9.12630:mRNA-p1;Tb927.9.12590:mRNA-p1;Tb927.9.12570:mRNA-p1;Tb927.9.12550:mRNA-p1;Tb927.9.12610:mRNA-p1	Tb927.9.12630:mRNA-p1;Tb927.9.12590:mRNA-p1;Tb927.9.12570:mRNA-p1;Tb927.9.12550:mRNA-p1;Tb927.9.12610:mRNA-p1	894	Tb927.9.12630:mRNA-p1 | transcript=Tb927.9.12630:mRNA | gene=Tb927.9.12630 | organism=Trypanosoma_brucei_brucei_TREU927 | gene_product=glycerol kinase, glycosomal | transcript_product=glycerol kinase, glycosomal | location=Tb927_09_v5.1:1982416-1983954(+)
		Tb927.5.890	oligosaccharyl transferase subunit, putative	Glycans	0.683273	1.64024	13	13	5	20.1	20.1	8.9	89.347	0	0	0	1.9	18.6	5.7	0	87.39	1500500000	22	20.5984	18.2547	20.1397	20.6741	22.9365	20.303	Tb927.5.890:mRNA-p1;Tb11.v5.0558.1-p1	Tb927.5.890:mRNA-p1	701	Tb927.5.890:mRNA-p1 | transcript=Tb927.5.890:mRNA | gene=Tb927.5.890 | organism=Trypanosoma_brucei_brucei_TREU927 | gene_product=oligosaccharyl transferase subunit, putative | transcript_product=oligosaccharyl transferase subunit, putative | location=Tb927
		Tb927.9.4210	fatty acyl CoA synthetase 3 (ACS3)	Lipids	0.958393	2.81516	19	19	19	33.2	33.2	33.2	77.853	3.7	2.3	0	6.8	27.1	28.6	0	134.74	2771700000	53	21.3476	17.5868	20.5102	21.1845	22.8968	23.8088	Tb927.9.4210:mRNA-p1;Tb927.9.4230:mRNA-p1;Tb11.v5.0561.1-p1;Tb927.9.4200:mRNA-p1	Tb927.9.4210:mRNA-p1;Tb927.9.4230:mRNA-p1;Tb11.v5.0561.1-p1	924	Tb927.9.4210:mRNA-p1 | transcript=Tb927.9.4210:mRNA | gene=Tb927.9.4210 | organism=Trypanosoma_brucei_brucei_TREU927 | gene_product=fatty acyl CoA synthetase 3 | transcript_product=fatty acyl CoA synthetase 3 | location=Tb927_09_v5.1:797920-800028(+) | pro
		Tb927.10.6070	UMSBP1	Mito.DNA	0.257018	-0.390212	11	10	10	74.3	74.3	74.3	14.566	60.7	74.3	67.9	54.3	65	74.3	0	183.6	34445000000	174	26.5888	26.8459	27.4397	25.601	26.6017	27.501	Tb927.10.6070:mRNA-p1	Tb927.10.6070:mRNA-p1	286	Tb927.10.6070:mRNA-p1 | transcript=Tb927.10.6070:mRNA | gene=Tb927.10.6070 | organism=Trypanosoma_brucei_brucei_TREU927 | gene_product=universal minicircle sequence binding protein 1 | transcript_product=universal minicircle sequence binding protein 1 | lo
		Tb927.4.1800	Mitochondrial ribosomal protein L3	Mito.translation	1.1602	2.74232	14	14	14	34	34	34	48.691	0	0	0	8.2	31.9	13.8	0	91.039	3360000000	31	20.3074	18.3592	20.3378	22.6086	23.8579	20.7649	Tb927.4.1800:mRNA-p1;Tb927.4.1790:mRNA-p1	Tb927.4.1800:mRNA-p1;Tb927.4.1790:mRNA-p1	612	Tb927.4.1800:mRNA-p1 | transcript=Tb927.4.1800:mRNA | gene=Tb927.4.1800 | organism=Trypanosoma_brucei_brucei_TREU927 | gene_product=Mitochondrial ribosomal protein L3 | transcript_product=Mitochondrial ribosomal protein L3 | location=Tb927_04_v5.1:450119-4
		Tb927.10.2240	NTF2-like domain, in Y14 TAP	Nuclear.transport	1.28536	2.95662	26	26	26	44	44	44	66.352	8	6	0	11.6	34.2	29.4	0	154.4	3019200000	59	20.0754	19.9148	18.9553	20.6915	22.9483	24.1755	Tb927.10.2240:mRNA-p1	Tb927.10.2240:mRNA-p1	250	Tb927.10.2240:mRNA-p1 | transcript=Tb927.10.2240:mRNA | gene=Tb927.10.2240 | organism=Trypanosoma_brucei_brucei_TREU927 | gene_product=RNA binding protein | transcript_product=RNA binding protein | location=Tb927_10_v5.1:578334-580100(+) | protein_length=5
		Tb927.8.8330	calpain, putative,cysteine peptidase, putative	Protease	1.08113	3.49332	20	20	20	26.7	26.7	26.7	98.456	4.8	1.9	0	11.6	22.5	10.6	0	144.41	3167000000	54	22.3481	17.1413	19.9903	23.4635	23.5776	22.9185	Tb927.8.8330:mRNA-p1;Tb927.4.3950:mRNA-p1	Tb927.8.8330:mRNA-p1	871	Tb927.8.8330:mRNA-p1 | transcript=Tb927.8.8330:mRNA | gene=Tb927.8.8330 | organism=Trypanosoma_brucei_brucei_TREU927 | gene_product=cysteine peptidase, putative | transcript_product=cysteine peptidase, putative | location=Tb927_08_v5.1:2466411-2469077(+) |
		Tb927.1.120	retrotransposon hot spot protein 4 (RHS4), putative	RHS	0.709574	2.08971	21	21	3	24.3	24.3	3.6	98.024	6.1	0	0	8.1	18.7	12.6	0	84.965	2815900000	42	23.3701	18.9643	20.0668	23.2443	22.9872	22.4389	Tb927.1.120:mRNA-p1;Tb11.0820:pseudogenic_transcript-p1;Tb11.v5.0295.1-p1	Tb927.1.120:mRNA-p1	134	Tb927.1.120:mRNA-p1 | transcript=Tb927.1.120:mRNA | gene=Tb927.1.120 | organism=Trypanosoma_brucei_brucei_TREU927 | gene_product=retrotransposon hot spot protein 4 (RHS4), putative | transcript_product=retrotransposon hot spot protein 4 (RHS4), putative |
		Tb927.11.10910	40S ribosomal protein SA	Ribosome	1.047	2.42006	12	12	12	46.7	46.7	46.7	27.609	3.3	12.3	9.8	15.6	35.2	36.1	0	114.28	7780800000	42	20.7382	21.6167	23.2957	22.9743	24.2448	25.6918	Tb927.11.10910:mRNA-p1;Tb927.11.10790:mRNA-p1	Tb927.11.10910:mRNA-p1;Tb927.11.10790:mRNA-p1	339	Tb927.11.10910:mRNA-p1 | transcript=Tb927.11.10910:mRNA | gene=Tb927.11.10910 | organism=Trypanosoma_brucei_brucei_TREU927 | gene_product=40S ribosomal protein SA, putative | transcript_product=40S ribosomal protein SA, putative | location=Tb927_11_v5.1:29
		Tb927.10.5370	40S ribosomal protein S10	Ribosome	0.0470491	0.0944672	14	14	14	64	64	64	19.285	25	39	20.9	27.3	58.1	41.3	0	144.28	6403700000	63	23.9465	22.8796	24.6691	23.0267	24.3902	24.3617	Tb927.10.5370:mRNA-p1;Tb927.10.5360:mRNA-p1	Tb927.10.5370:mRNA-p1;Tb927.10.5360:mRNA-p1	276	Tb927.10.5370:mRNA-p1 | transcript=Tb927.10.5370:mRNA | gene=Tb927.10.5370 | organism=Trypanosoma_brucei_brucei_TREU927 | gene_product=40S ribosomal protein S10, putative | transcript_product=40S ribosomal protein S10, putative | location=Tb927_10_v5.1:134
		Tb927.11.6300	40S ribosomal protein S5	Ribosome	1.25183	4.27055	13	13	13	57.9	57.9	57.9	21.386	11.1	0	4.7	43.7	53.7	30	0	240.95	7135700000	38	23.3104	18.6564	19.8804	26.022	25.2703	23.3665	Tb927.11.6300:mRNA-p1	Tb927.11.6300:mRNA-p1	467	Tb927.11.6300:mRNA-p1 | transcript=Tb927.11.6300:mRNA | gene=Tb927.11.6300 | organism=Trypanosoma_brucei_brucei_TREU927 | gene_product=40S ribosomal protein S5, putative | transcript_product=40S ribosomal protein S5, putative | location=Tb927_11_v5.1:17723
		Tb927.11.8200	40S ribosomal protein S26	Ribosome	0.601196	3.42141	8	8	8	57.7	57.7	57.7	12.806	36	15.3	0	41.4	55	42.3	0	41.386	6771600000	55	25.5377	17.2435	19.8805	25.165	24.8656	22.8953	Tb927.11.8200:mRNA-p1	Tb927.11.8200:mRNA-p1	493	Tb927.11.8200:mRNA-p1 | transcript=Tb927.11.8200:mRNA | gene=Tb927.11.8200 | organism=Trypanosoma_brucei_brucei_TREU927 | gene_product=ribosomal protein S26, putative | transcript_product=ribosomal protein S26, putative | location=Tb927_11_v5.1:2305896-230
		Tb927.10.5340	40S ribosomal protein S18	Ribosome	0.826212	2.46326	9	9	9	45.8	45.8	45.8	17.51	24.2	0	9.2	22.2	39.2	29.4	0	92.965	1064100000	21	22.3899	17.645	20.0991	22.8631	22.3767	22.2838	Tb927.10.5340:mRNA-p1;Tb927.10.5330:mRNA-p1;Tb11.v5.1060.1-p1;Tb11.v5.0243.1-p1	Tb927.10.5340:mRNA-p1;Tb927.10.5330:mRNA-p1;Tb11.v5.1060.1-p1;Tb11.v5.0243.1-p1	74	Tb927.10.5340:mRNA-p1 | transcript=Tb927.10.5340:mRNA | gene=Tb927.10.5340 | organism=Trypanosoma_brucei_brucei_TREU927 | gene_product=40S ribosomal protein S18, putative | transcript_product=40S ribosomal protein S18, putative | location=Tb927_10_v5.1:133
		Tb927.9.15360	40S ribosomal protein S6	Ribosome	1.15494	4.13305	15	15	8	44	44	25.2	28.476	6.4	0	0	21.2	40.4	16	0	98.744	4868100000	39	20.8254	18.1995	20.9665	26.2009	24.7835	21.4061	Tb927.9.15360:mRNA-p1	Tb927.9.15360:mRNA-p1	908	Tb927.9.15360:mRNA-p1 | transcript=Tb927.9.15360:mRNA | gene=Tb927.9.15360 | organism=Trypanosoma_brucei_brucei_TREU927 | gene_product=40S ribosomal protein S6, putative | transcript_product=40S ribosomal protein S6, putative | location=Tb927_09_v5.1:23843
		Tb927.8.1110	40S ribosomal protein S9 190aa, 22KDa	Ribosome	1.0103	2.88194	10	10	10	55.8	55.8	55.8	22.051	0	0	0	5.8	55.8	13.7	0	56.965	3627900000	20	19.8346	17.9863	19.355	21.935	24.0542	19.8326	Tb927.8.1110:mRNA-p1;Tb927.10.5610:mRNA-p1	Tb927.8.1110:mRNA-p1;Tb927.10.5610:mRNA-p1	280	Tb927.8.1110:mRNA-p1 | transcript=Tb927.8.1110:mRNA | gene=Tb927.8.1110 | organism=Trypanosoma_brucei_brucei_TREU927 | gene_product=40S ribosomal protein S9, putative | transcript_product=40S ribosomal protein S9, putative | location=Tb927_08_v5.1:355680-3
		Tb927.9.8740	DRBD3 (PTB1)	RNA.binding	0.550739	0.929562	18	18	18	44.3	44.3	44.3	36.984	17.7	22.9	23.2	17.1	41.9	33.3	0	323.31	21913000000	102	23.9272	25.6097	24.6056	24.655	25.6639	26.6123	Tb927.9.8740:mRNA-p1	Tb927.9.8740:mRNA-p1	945	Tb927.9.8740:mRNA-p1 | transcript=Tb927.9.8740:mRNA | gene=Tb927.9.8740 | organism=Trypanosoma_brucei_brucei_TREU927 | gene_product=Double RNA binding domain protein 3 | transcript_product=Double RNA binding domain protein 3 | location=Tb927_09_v5.1:140932
		Tb927.11.14090	DRBD18	RNA.binding	0.701323	2.18	15	15	15	37.9	37.9	37.9	51.674	3.1	3.1	4	5.2	27.5	29.4	0	79.452	2207600000	40	20.1029	19.0519	19.551	19.0465	22.574	23.6253	Tb927.11.14090:mRNA-p1	Tb927.11.14090:mRNA-p1	369	Tb927.11.14090:mRNA-p1 | transcript=Tb927.11.14090:mRNA | gene=Tb927.11.14090 | organism=Trypanosoma_brucei_brucei_TREU927 | gene_product=Double RNA binding domain protein 18 | transcript_product=Double RNA binding domain protein 18 | location=Tb927_11_v5.
		Tb927.9.13990	DRBD2	RNA.binding	0.124966	-0.498606	13	13	13	44.3	44.3	44.3	34.618	7.2	20.3	10.5	3.6	38	30.2	0	72.205	3224900000	48	22.2104	23.1733	21.7331	19.0966	22.9879	23.5365	Tb927.9.13990:mRNA-p1	Tb927.9.13990:mRNA-p1	901	Tb927.9.13990:mRNA-p1 | transcript=Tb927.9.13990:mRNA | gene=Tb927.9.13990 | organism=Trypanosoma_brucei_brucei_TREU927 | gene_product=RNA-binding protein, putative | transcript_product=RNA-binding protein, putative | location=Tb927_09_v5.1:2186949-2187866
		Tb927.3.3940	DRBD11	RNA.binding	0.485981	1.27947	7	7	7	20.7	20.7	20.7	61.716	5.6	8.9	2.7	5.6	14.7	7.4	0	35.645	522430000	18	21.1466	17.3809	19.7746	20.4662	20.3282	21.346	Tb927.3.3940:mRNA-p1	Tb927.3.3940:mRNA-p1	575	Tb927.3.3940:mRNA-p1 | transcript=Tb927.3.3940:mRNA | gene=Tb927.3.3940 | organism=Trypanosoma_brucei_brucei_TREU927 | gene_product=RNA-binding protein, putative | transcript_product=RNA-binding protein, putative | location=Tb927_03_v5.1:1097682-1099463(+)
		Tb927.11.550	SCD6	RNA.degradation	0.112509	-0.414937	12	12	12	59.6	59.6	59.6	31.292	23.2	21.1	21.1	0	47.1	32.1	0	170.98	2123200000	45	22.923	20.8246	23.2233	20.0563	21.7955	23.8744	Tb927.11.550:mRNA-p1	Tb927.11.550:mRNA-p1	458	Tb927.11.550:mRNA-p1 | transcript=Tb927.11.550:mRNA | gene=Tb927.11.550 | organism=Trypanosoma_brucei_brucei_TREU927 | gene_product=Suppressor of clathrin deficiency 6, putative | transcript_product=Suppressor of clathrin deficiency 6, putative | location=
		Tb927.10.1510	NOT1	RNA.degradation	0.869879	2.34929	31	31	31	17.2	17.2	17.2	259.12	1.9	0	0	12.1	11.4	1	0	198.43	1093300000	66	19.6154	19.077	19.4825	23.9551	21.6251	19.6425	Tb927.10.1510:mRNA-p1	Tb927.10.1510:mRNA-p1	226	Tb927.10.1510:mRNA-p1 | transcript=Tb927.10.1510:mRNA | gene=Tb927.10.1510 | organism=Trypanosoma_brucei_brucei_TREU927 | gene_product=CCR4-NOT transcription complex subunit 1 | transcript_product=CCR4-NOT transcription complex subunit 1 | location=Tb927_1
		Tb927.8.900	splicing factor TSR1 (TSR1)	RNA.processing	1.08492	3.25424	13	13	13	38.7	38.7	38.7	37.469	15.2	3.7	0	24.4	33.2	15.9	0	53.846	3576800000	38	22.0393	17.663	19.6963	23.0833	24.1201	21.9577	Tb927.8.900:mRNA-p1	Tb927.8.900:mRNA-p1	873	Tb927.8.900:mRNA-p1 | transcript=Tb927.8.900:mRNA | gene=Tb927.8.900 | organism=Trypanosoma_brucei_brucei_TREU927 | gene_product=splicing factor TSR1 | transcript_product=splicing factor TSR1 | location=Tb927_08_v5.1:270276-271262(-) | protein_length=328 |
		Tb927.2.4710	TRRM1	RNA.processing	0.723772	2.87312	19	19	19	45.1	45.1	45.1	49.983	15.2	4.3	0	19	41.3	18.4	0	87.696	3681000000	79	23.4145	18.7205	19.1933	24.5054	24.1906	21.2517	Tb927.2.4710:mRNA-p1	Tb927.2.4710:mRNA-p1	529	Tb927.2.4710:mRNA-p1 | transcript=Tb927.2.4710:mRNA | gene=Tb927.2.4710 | organism=Trypanosoma_brucei_brucei_TREU927 | gene_product=RNA-binding protein, putative | transcript_product=RNA-binding protein, putative | location=Tb927_02_v5.1:834116-835441(-) |
		Tb927.10.4570	EF2 elongation factor 2	Translation	1.20607	4.2875	43	43	43	61.9	61.9	61.9	94.333	1.2	0	6.6	14.1	46	43.1	0	323.31	8736400000	124	20.0182	17.7392	23.2509	23.745	24.7105	25.4153	Tb927.10.4570:mRNA-p1;Tb927.10.4560:mRNA-p1	Tb927.10.4570:mRNA-p1;Tb927.10.4560:mRNA-p1	269	Tb927.10.4570:mRNA-p1 | transcript=Tb927.10.4570:mRNA | gene=Tb927.10.4570 | organism=Trypanosoma_brucei_brucei_TREU927 | gene_product=elongation factor 2 | transcript_product=elongation factor 2 | location=Tb927_10_v5.1:1167167-1169707(-) | protein_length
		Tb927.11.13190	EF1 gamma, elongation factor 1 gamma, putative	Translation	0.859826	3.04741	21	21	21	56.9	56.9	56.9	46.275	3.5	3.5	4.5	8.4	45.3	36.6	0	155.52	3727900000	47	21.0237	17.6502	20.0765	20.0278	24.1242	23.7407	Tb927.11.13190:mRNA-p1;Tb927.11.13090:mRNA-p1	Tb927.11.13190:mRNA-p1;Tb927.11.13090:mRNA-p1	358	Tb927.11.13190:mRNA-p1 | transcript=Tb927.11.13190:mRNA | gene=Tb927.11.13190 | organism=Trypanosoma_brucei_brucei_TREU927 | gene_product=elongation factor 1 gamma, putative | transcript_product=elongation factor 1 gamma, putative | location=Tb927_11_v5.1:
		Tb927.11.11370	guanine nucleotide-binding protein beta subunit- like protein (TRACK)	Translation	0.97678	2.26428	15	15	15	63.5	63.5	63.5	34.69	3.8	34.3	3.8	10.1	55.7	35.8	0	217.73	3222500000	40	20.3825	23.2424	19.82	22.9413	23.5751	23.7213	Tb927.11.11370:mRNA-p1;Tb927.11.11360:mRNA-p1	Tb927.11.11370:mRNA-p1;Tb927.11.11360:mRNA-p1	345	Tb927.11.11370:mRNA-p1 | transcript=Tb927.11.11370:mRNA | gene=Tb927.11.11370 | organism=Trypanosoma_brucei_brucei_TREU927 | gene_product=receptor for activated C kinase 1 | transcript_product=receptor for activated C kinase 1 | location=Tb927_11_v5.1:3037
		Tb927.10.14550	DED1-1, ATP-dependent DEAD/H RNA helicase, VASA homologue; strongest yeast match is to DBP1	Translation	0.254233	0.867322	19	18	18	35.3	35.3	35.3	66.588	20.2	3.2	2.1	17.6	22.2	18.9	0	189.47	1533100000	51	24.3036	21.312	20.2064	23.3889	21.6456	23.3894	Tb927.10.14550:mRNA-p1	Tb927.10.14550:mRNA-p1	212	Tb927.10.14550:mRNA-p1 | transcript=Tb927.10.14550:mRNA | gene=Tb927.10.14550 | organism=Trypanosoma_brucei_brucei_TREU927 | gene_product=ATP-dependent RNA helicase HEL67 | transcript_product=ATP-dependent RNA helicase HEL67 | location=Tb927_10_v5.1:356501
		Tb927.11.6160	ERF3 eukaryotic release factor 3, putative	Translation	1.2855	2.62933	18	18	18	25.1	25.1	25.1	76.914	0	0	0	3.6	15.5	17.5	0	76.162	958890000	29	19.4325	17.4801	19.627	20.2484	21.6209	22.5582	Tb927.11.6160:mRNA-p1	Tb927.11.6160:mRNA-p1	462	Tb927.11.6160:mRNA-p1 | transcript=Tb927.11.6160:mRNA | gene=Tb927.11.6160 | organism=Trypanosoma_brucei_brucei_TREU927 | gene_product=eukaryotic release factor 3, putative | transcript_product=eukaryotic release factor 3, putative | location=Tb927_11_v5.1
		Tb927.8.4500	eIF4G5	Translation	1.05561	1.33264	15	15	15	24.8	24.8	24.8	84.574	0	0	0	9.5	17.6	5.9	0	91.431	750290000	25	20.3902	19.4838	19.5812	21.1374	22.0567	20.259	Tb927.8.4500:mRNA-p1;Tb11.v5.0763.1-p1	Tb927.8.4500:mRNA-p1;Tb11.v5.0763.1-p1	841	Tb927.8.4500:mRNA-p1 | transcript=Tb927.8.4500:mRNA | gene=Tb927.8.4500 | organism=Trypanosoma_brucei_brucei_TREU927 | gene_product=Eukaryotic translation initiation factor 4 gamma 5 | transcript_product=Eukaryotic translation initiation factor 4 gamma 5 |
		Tb927.8.1870	Golgi/lysosome glycoprotein 1 (tGLP1)	Vesicular.transport	1.13619	2.81474	18	18	18	33	33	33	67.597	0	0	0	4.9	33	19.5	0	110.91	1788500000	38	20.2869	18.4283	18.034	19.8612	22.6215	22.7108	Tb927.8.1870:mRNA-p1	Tb927.8.1870:mRNA-p1	815	Tb927.8.1870:mRNA-p1 | transcript=Tb927.8.1870:mRNA | gene=Tb927.8.1870 | organism=Trypanosoma_brucei_brucei_TREU927 | gene_product=Golgi/lysosome glycoprotein 1 | transcript_product=Golgi/lysosome glycoprotein 1 | location=Tb927_08_v5.1:610513-612363(-) |
		Tb927.4.2070	Myosin-like protein, possibly ER-Golgi vesicular transport	Vesicular.transport	1.24701	3.75345	16	16	16	45.9	45.9	45.9	511.32	19.6	18.2	0	45.9	40.2	32.8	0	200.44	1211500000	64	20.1915	18.9717	19.6225	26.0733	22.212	21.7607	Tb927.4.2070:mRNA-p1;Tb11.v5.0410.1-p1;Tb11.v5.0881.1-p1	Tb927.4.2070:mRNA-p1;Tb11.v5.0410.1-p1	620	Tb927.4.2070:mRNA-p1 | transcript=Tb927.4.2070:mRNA | gene=Tb927.4.2070 | organism=Trypanosoma_brucei_brucei_TREU927 | gene_product=antigenic protein, putative | transcript_product=antigenic protein, putative | location=Tb927_04_v5.1:517255-530622(-) | pro
		Tb927.11.6440	hypothetical protein, conserved, Bromodomain and poly(Q), often in TAP MS, low similarity to coiled-coil proteins and hook proteins (cytoskeletal linkers)	ZUnknown	1.1416	-1.14968	16	16	16	29.3	29.3	29.3	48.841	10.9	14.3	12.5	5.4	24.7	21.8	0	76.11	4932800000	75	25.4557	24.3722	24.8334	23.3545	23.412	24.4459	Tb927.11.6440:mRNA-p1	Tb927.11.6440:mRNA-p1	470	Tb927.11.6440:mRNA-p1 | transcript=Tb927.11.6440:mRNA | gene=Tb927.11.6440 | organism=Trypanosoma_brucei_brucei_TREU927 | gene_product=hypothetical protein, conserved | transcript_product=hypothetical protein, conserved | location=Tb927_11_v5.1:1821094-182
		Tb10.v4.0053	hypothetical protein, 411 kDa mostly peptide repeats	ZUnknown	1.0136	2.88445	7	7	7	15.1	15.1	15.1	483.8	0.6	0	0	14	5.5	3.1	0	21.404	1204400000	26	20.6773	17.5354	20.2267	23.8694	22.4868	20.7366	Tb10.v4.0053:mRNA-p1;Tb10.v4.0052:mRNA-p1;Tb927.10.10280:mRNA-p1;Tb927.10.10360:mRNA-p1	Tb10.v4.0053:mRNA-p1;Tb10.v4.0052:mRNA-p1;Tb927.10.10280:mRNA-p1;Tb927.10.10360:mRNA-p1	57	Tb10.v4.0053:mRNA-p1 | transcript=Tb10.v4.0053:mRNA | gene=Tb10.v4.0053 | organism=Trypanosoma_brucei_brucei_TREU927 | gene_product=hypothetical protein | transcript_product=hypothetical protein | location=tryp_X-106b08.p1c:3-12359(-) | protein_length=4119
		Tb927.6.2210	hypothetical protein, conserved, copurifies with ZC3H32 and 4EIP	ZUnknown	0.415137	0.956848	9	9	9	9	9	9	123.85	5.1	0	0	1.2	6.2	2.5	0	86.04	342620000	22	20.1395	17.6212	20.021	20.644	20.8583	19.1498	Tb927.6.2210:mRNA-p1	Tb927.6.2210:mRNA-p1	710	Tb927.6.2210:mRNA-p1 | transcript=Tb927.6.2210:mRNA | gene=Tb927.6.2210 | organism=Trypanosoma_brucei_brucei_TREU927 | gene_product=hypothetical protein, conserved | transcript_product=hypothetical protein, conserved | location=Tb927_06_v5.1:699807-703193(

## Sheet: 3. PERSEUS FDR 5%
FDR<5% s0+0.1	2xenriched Tubulin	GeneID	Annotation	Category	-LOG(P-value)	Difference	Max peptides tubulin	id	Peptides	Razor + unique peptides	Unique peptides	Sequence coverage [%]	Unique + razor sequence coverage [%]	Unique sequence coverage [%]	Mol. weight [kDa]	Q-value	Score	Intensity	MS/MS count	LFQ intensity TUB1	LFQ intensity TUB2	LFQ intensity TUB3	LFQ intensity VSG1	LFQ intensity VSG2	LFQ intensity VSG3	LFQ average tbulin	LFQ average VSG	Majority protein IDs
+	+	Tb927.11.530	RBP3	RNA.binding	1.95207	-3.91119	6	455	9	9	9	54.5	54.5	54.5	22.331	0	58.532	542170000	19	22.3509	24.0753	23.9817	18.4902	19.3764	20.8077	23.8594	20.3484	Tb927.11.530:mRNA-p1
+		Tb927.5.1210	short-chain dehydrogenase, putative	Enzyme	2.37761	3.79357	0	663	13	13	13	49.8	49.8	49.8	33.876	0	90.125	3041700000	29	20.5819	18.4009	19.1866	23.1962	23.351	23.003	20.1247	23.2061	Tb927.5.1210:mRNA-p1
+		Tb927.3.1590	mitochondrial RNA binding complex 1 subunit (MRB1590)	Mito.RNA	2.02707	2.59232	1	549	13	13	13	26.8	26.8	26.8	72.678	0	152.71	823060000	27	19.5877	18.0444	19.6937	21.9729	21.6643	21.4655	19.4733	21.7516	Tb927.3.1590:mRNA-p1
+		Tb927.10.14710	40S ribosomal protein S2	Ribosome	2.15966	4.56549	0	214	22	22	22	68	68	68	28.642	0	184.27	6757700000	74	20.0683	17.6975	20.3778	23.4817	24.463	23.8953	20.0745	24.1242	Tb927.10.14710:mRNA-p1;Tb927.10.14600:mRNA-p1
+		Tb927.9.6070	40S ribosomal protein S3	Ribosome	2.01269	3.30062	4	170	22	22	22	78	78	78	24.216	0	179.2	14866000000	116	22.4758	21.2367	23.6076	25.8807	25.9788	25.3624	23.1631	25.8113	Tb927.9.6070:mRNA-p1;Tb927.10.11540:mRNA-p1
+		Tb927.4.2040	ALBA3	RNA.binding	2.28086	4.70386	3	619	15	15	7	51.6	51.6	23.2	20.808	0	301.37	11052000000	58	20.7087	21.5016	19.049	24.2386	25.4256	25.7066	21.0907	25.422	Tb927.4.2040:mRNA-p1
+		Tb927.9.9450	ZC3H28	RNA.binding	2.47067	3.77327	0	951	21	21	20	25	25	23.7	114.75	0	131.75	1818200000	49	20.0945	18.3305	18.5539	22.7936	23.1742	22.331	19.6369	22.8902	Tb927.9.9450:mRNA-p1
+		Tb927.11.1980	ZC3H41	RNA.binding	2.09652	2.25764	13	409	41	41	41	65.2	65.2	65.2	58.459	0	323.31	29780000000	204	25.4538	24.0171	24.1788	26.7818	26.9444	26.6964	25.014	26.82	Tb927.11.1980:mRNA-p1
+		Tb927.6.4770	MKT1	RNA.degradation	2.85083	5.80557	1	735	33	33	33	48.3	48.3	48.3	83.306	0	240.83	6725300000	104	20.1189	17.6455	19.3311	24.6425	24.8458	25.0239	19.7086	24.8646	Tb927.6.4770:mRNA-p1
+		Tb927.8.4540	PBP1	RNA.degradation	2.41742	4.05967	0	842	13	13	13	31.8	31.8	31.8	59.599	0	92.094	1870200000	32	19.7346	17.5099	18.9182	22.4583	22.8085	23.0749	19.3214	22.849	Tb927.8.4540:mRNA-p1
+		Tb927.9.4680	eIF4A1	Translation	2.15802	4.04379	1	927	14	14	14	45.3	45.3	45.3	45.361	0	103.23	3889700000	52	20.0682	18.1383	19.2417	22.0899	23.9198	23.57	19.6559	23.6075	Tb927.9.4680:mRNA-p1
+		Tb927.3.4070	pyruvate transporter PT1	Transporter	2.11008	3.54355	1	578	11	11	11	13.9	13.9	13.9	65.502	0	79.223	3220500000	39	20.6552	18.5633	18.9661	22.414	23.5157	22.8856	20.1903	23.157	Tb927.3.4070:mRNA-p1;Tb927.3.4080:mRNA-p1;Tb927.3.4100:mRNA-p1;Tb927.3.4090:mRNA-p1;Tb927.3.4110:mRNA-p1
+		Tb927.1.4650	cyclin-like F-box protein (CFB2)	Ubiquitin.proteasome	1.9688	4.26988	0	155	18	18	18	43.9	43.9	43.9	52.284	0	104.81	6733100000	78	21.1914	18.3232	20.099	24.3619	24.7774	23.284	20.7486	24.4514	Tb927.1.4650:mRNA-p1
+		Tb927.10.14150	ERBP1	Vesicular.transport	2.51867	5.57681	10	205	54	54	54	69.7	69.7	69.7	55.311	0	323.31	45856000000	237	21.1286	23.8989	21.9064	28.423	27.5264	27.7149	23.4269	28.0674	Tb927.10.14150:mRNA-p1
+		Tb927.10.6050	clathrin heavy chain (CHC)	Vesicular.transport	2.91326	5.52508	3	285	70	70	70	49	49	49	190.62	0	323.31	8435900000	162	20.4895	18.5722	18.4128	24.4961	24.8741	24.6796	20.0212	24.7104	Tb927.10.6050:mRNA-p1;Tb11.v5.0198.1-p1
+		Tb927.8.1290	SUMO-interaction motif protein, copurifies with ZC3H32	ZUnknown	2.97735	4.66081	0	806	30	30	30	32.5	32.5	32.5	120.05	0	138.72	2692500000	75	18.8347	18.6368	18.9564	24.1991	23.7975	22.4137	18.8285	23.8721	Tb927.8.1290:mRNA-p1
+		Tb927.11.14190	Staphylococcal nuclease homologue/Tudor domain containing protein, putative	ZUnknown	2.23144	4.17472	10	371	49	49	49	54.3	54.3	54.3	100.47	0	323.31	18052000000	211	23.4525	20.9577	21.3601	26.2273	25.9022	26.1648	22.9802	26.1192	Tb927.11.14190:mRNA-p1
+		Tb927.4.1300	amidinotransferase, putative	ZUnknown	2.13204	3.75778	3	608	21	21	21	58.6	58.6	58.6	42.015	0	323.31	5060300000	53	20.7498	19.6563	19.1447	22.5098	24.4785	23.836	20.3162	24.0942	Tb927.4.1300:mRNA-p1
+		Tb927.8.1500	hypothetical protein, conserved, copurifies with MKT1	ZUnknown	2.73745	3.02659	2	808	9	9	9	22.6	22.6	22.6	63.206	0	89.611	1555500000	32	20.1987	18.8506	19.5819	22.8138	22.3505	22.5467	19.831	22.6119	Tb927.8.1500:mRNA-p1
	+	Tb927.6.4440	RBP42	RNA.binding	1.87654	-1.61942	9	731	16	16	16	51.4	51.4	51.4	37.718	0	323.31	13138000000	96	25.9005	26.5779	26.3901	24.0231	25.0369	24.9502	26.3701	24.8421	Tb927.6.4440:mRNA-p1
	+	Tb927.11.510	UBP2	RNA.binding	0.396518	-1.79821	5	451	9	9	9	60	60	60	19.559	0	86.427	2133500000	38	20.026	24.5712	24.1286	18.8475	21.292	23.1916	24.2279	22.7199	Tb927.11.510:mRNA-p1;Tb927.11.500:mRNA-p1
	+	Tb927.11.6440	hypothetical protein, conserved, Bromodomain and poly(Q), often in TAP MS, low similarity to coiled-coil proteins and hook proteins (cytoskeletal linkers)	ZUnknown	1.1416	-1.14968	7	470	16	16	16	29.3	29.3	29.3	48.841	0	76.11	4932800000	75	25.4557	24.3722	24.8334	23.3545	23.412	24.4459	25.0996	24.0382	Tb927.11.6440:mRNA-p1
		Tb927.11.17000	AIR9	Cell.cycle	1.51563	4.03481	2	406	30	30	30	36	36	36	109.72	0	258.77	5274100000	78	22.0841	17.947	19.4649	23.433	23.9465	24.221	21.6081	23.9729	Tb927.11.17000:mRNA-p1;Tb11.v5.0404.1-p1
		Tb927.10.10960	heat shock protein 83, HSP83	Chaperone	1.55577	3.36526	2	97	32	32	32	41.6	41.6	41.6	80.763	0	323.31	7159900000	93	20.1636	20.0462	21.7573	22.8525	23.5863	25.6241	21.2993	25.1517	Tb927.10.10960:mRNA-p1;Tb927.10.10950:mRNA-p1;Tb927.10.10940:mRNA-p1;Tb927.10.10920:mRNA-p1;Tb927.10.10910:mRNA-p1;Tb927.10.10900:mRNA-p1;Tb927.10.10890:mRNA-p1;Tb11.v5.0543.1-p1;Tb927.10.10980:mRNA-p1;Tb927.10.10970:mRNA-p1;Tb927.10.10930:mRNA-p1
		Tb927.1.2400	alpha tubulin	Cytoskeleton	1.47775	4.07056	7	141	25	25	25	68.5	68.5	68.5	49.787	0	323.31	9170200000	80	19.5024	21.8366	19.0578	22.3274	24.9809	25.3002	21.3623	24.9935	Tb927.1.2400:mRNA-p1;Tb927.1.2380:mRNA-p1;Tb927.1.2360:mRNA-p1;Tb927.1.2340:mRNA-p1;Tb11.v5.0468.1-p1
		Tb927.10.1170	intraflagellar transport protein IFT172	Cytoskeleton	1.61606	2.27297	2	171	18	18	18	13.9	13.9	13.9	196.6	0	131.17	1031000000	36	20.2503	18.199	19.7661	21.4764	22.0298	21.5281	19.8993	21.7553	Tb927.10.1170:mRNA-p1;Tb11.0560:mRNA-p1
		Tb927.5.1460	Mo/Co carrier or lysine decarboxylase	Enzyme	1.85957	1.1527	0	666	6	6	6	19	19	19	36.762	0	18.321	523780000	13	19.9992	19.4896	19.2723	20.4962	21.0699	20.6531	19.6973	20.8102	Tb927.5.1460:mRNA-p1
		Tb927.4.1800	Mitochondrial ribosomal protein L3	Mito.translation	1.47859	3.58146	0	612	14	14	14	34	34	34	48.691	0	91.039	3360000000	31	20.1391	17.9028	18.4451	22.6086	23.8579	20.7649	19.6731	23.4049	Tb927.4.1800:mRNA-p1;Tb927.4.1790:mRNA-p1
		Tb927.10.2240	NTF2-like domain, in Y14 TAP	Nuclear.transport	1.34303	2.98863	3	250	26	26	26	44	44	44	66.352	0	154.4	3019200000	59	19.7114	19.9148	19.2232	20.6915	22.9483	24.1755	19.7	23.7236	Tb927.10.2240:mRNA-p1
		Tb927.9.15360	40S ribosomal protein S6	Ribosome	1.46385	5.32464	1	908	15	15	8	44	44	25.2	28.476	0	98.744	4868100000	39	20.6219	17.8198	17.9749	26.2009	24.7835	21.4061	20.1464	25.7401	Tb927.9.15360:mRNA-p1
		Tb927.10.560	40S ribosomal protein S11	Ribosome	1.68918	4.72274	1	279	11	11	2	55.2	55.2	12.1	20.087	0	77.271	4597300000	28	20.6616	18.2994	18.7716	24.7109	25.2847	21.9053	20.1919	24.9104	Tb927.10.560:mRNA-p1
		Tb927.9.3990	40S ribosomal protein S7	Ribosome	1.64056	3.72614	1	921	11	11	11	51.5	51.5	51.5	23.841	0	48.171	1947600000	22	20.2925	18.6342	18.3493	23.3429	23.9403	21.1713	19.8297	23.5616	Tb927.9.3990:mRNA-p1;Tb927.9.3920:mRNA-p1
		Tb927.11.13007	60S ribosomal protein L40-ubiquitin	Ribosome	1.53229	3.55423	1	60	5	5	5	36.7	36.7	36.7	14.656	0	105.42	1984700000	19	20.2927	16.8639	18.5228	21.6482	22.9246	21.7694	19.8231	22.4978	Tb927.11.13007:mRNA-p1;Tb927.11.13003:mRNA-p1;Tb11.v5.0537.1-p1;Tb927.11.9920:mRNA-p1;Tb11.01.1680.v5.1-p1
		Tb927.10.1100	60S ribosomal protein L9	Ribosome	1.4266	1.62175	0	168	8	8	8	56.1	56.1	56.1	21.857	0	45.838	809850000	16	20.3646	19.3335	19.9612	21.5285	20.7436	22.2524	20.0601	21.8616	Tb927.10.1100:mRNA-p1;Tb927.6.4690:mRNA-p1
		Tb927.6.4980	40S ribosomal protein S14	Ribosome	1.738	1.18442	4	61	10	10	10	49.3	49.3	49.3	15.513	0	82.309	3786600000	43	22.9464	22.098	22.8878	23.5684	23.8664	24.0507	22.7737	23.871	Tb927.6.4980:mRNA-p1;Tb927.11.7705:mRNA-p1;Tb11.0390:mRNA-p1;Tb11.0290:mRNA-p1
		Tb927.10.10850	AGO1	RNA.degradation	1.35888	2.74994	0	167	21	21	21	27.4	27.4	27.4	99.184	0	57.04	1589600000	25	20.0481	17.335	19.7297	20.9891	22.2578	22.1157	19.7419	22.0298	Tb927.10.10850:mRNA-p1
		Tb927.3.2600	ATP-dependent DEAD/H RNA helicase, putative, no clear yeast homologue	RNA.helicase	1.90358	3.28474	0	557	37	37	37	22.7	22.7	22.7	244.99	0	159.16	2280000000	70	20.4681	18.293	18.6883	22.1662	23.1527	21.9848	20.001	22.7442	Tb927.3.2600:mRNA-p1
		Tb927.9.12510	DED1-2, ATP-dependent DEAD/H RNA helicase, DED1-2	Translation	1.42137	4.18156	4	893	37	37	36	50.2	50.2	49	82.74	0	172.98	3227500000	102	21.9823	17.4354	19.6258	24.4791	23.1418	23.9673	21.5071	24.1335	Tb927.9.12510:mRNA-p1
		Tb927.5.2570	EIF3B translation initiation factor	Translation	1.54159	2.92469	1	679	22	22	22	34.9	34.9	34.9	79.81	0	107.05	2084700000	33	20.0255	18.4191	19.0308	20.6094	22.9142	22.7259	19.5999	22.6554	Tb927.5.2570:mRNA-p1
		Tb927.9.10770	PABP2	Translation	1.34077	1.93678	22	881	62	62	62	76	76	76	62.147	0	323.31	133620000000	585	27.7988	26.75	25.8255	29.0025	29.1727	28.0095	27.3631	28.9372	Tb927.9.10770:mRNA-p1
		Tb927.10.2110	EF1-alpha elongation factor 1-alpha, (TEF1)	Translation	1.49823	1.89747	6	131	32	32	32	70.8	70.8	70.8	49.105	0	323.31	21654000000	143	24.6262	23.0584	24.2748	25.2192	26.0669	26.3657	24.3171	26.0855	Tb927.10.2110:mRNA-p1;Tb927.10.2100:mRNA-p1;Tb927.10.2090:mRNA-p1;Tb11.v5.1046.1-p1
		Tb927.9.12650	ubiquitin-activating enzyme e1, putative (UBA2)	Ubiquitin.proteasome	1.61446	2.9117	0	895	18	18	18	17	17	17	134.65	0	69.609	1165700000	33	19.6213	17.5339	19.5232	20.9288	21.956	22.5288	19.4009	22.1631	Tb927.9.12650:mRNA-p1
		Tb927.4.2070	Myosin-like protein, possibly ER-Golgi vesicular transport	Vesicular.transport	1.31351	3.97585	2	620	16	16	16	45.9	45.9	45.9	511.32	0	200.44	1211500000	64	20.1116	18.9717	19.0351	26.0733	22.212	21.7607	19.6976	25.5963	Tb927.4.2070:mRNA-p1;Tb11.v5.0410.1-p1
		Tb927.8.890	Ras-related protein Rab1A	Vesicular.transport	1.3648	2.84273	1	872	10	10	9	48.1	48.1	42.8	22.714	0	68.165	1371800000	23	19.8159	17.4076	18.7079	20.1829	22.4736	21.8031	19.373	22.0824	Tb927.8.890:mRNA-p1
		Tb927.7.7460	hypothetical protein, conserved, no domains	ZUnknown	1.33065	2.05302	3	799	12	12	12	65.6	65.6	65.6	22.358	0	116.11	3815200000	46	20.0819	21.503	22.2748	22.71	23.8255	23.4833	21.8679	23.5335	Tb927.7.7460:mRNA-p1
		Tb927.11.9590	S-adenosylhomocysteine hydrolase, putative	Amino.acids	0.686491	2.63307	0	507	20	20	20	39.8	39.8	39.8	48.447	0	85.308	2732000000	42	21.0666	18.0828	18.4428	18.8946	23.1633	23.4335	20.5909	23.143	Tb927.11.9590:mRNA-p1
		Tb927.5.3800	glutamine hydrolysing (not ammonia-dependent) carbomoyl phosphate synthase, putative	Amino.acids	0.862549	1.53287	0	693	20	20	20	13.1	13.1	13.1	204.09	0	68.9	689110000	25	20.4624	18.6721	18.6458	19.6798	21.1618	21.5374	19.9988	21.2171	Tb927.5.3800:mRNA-p1
		Tb927.11.16760	Tric complex alpha subunit (TCP-1-alpha)	Chaperone	1.11403	2.95426	0	401	21	21	21	39.9	39.9	39.9	59.432	0	113.85	1999700000	41	20.4215	17.4051	19.6976	20.4572	22.6655	23.2643	20.0199	22.8853	Tb927.11.16760:mRNA-p1
		Tb927.11.11330	heat shock protein 70, major HSP70	Chaperone	0.666096	2.29476	3	130	24	24	21	43.4	43.4	38.9	71.408	0	178.13	2546600000	41	20.7891	17.7491	21.3917	20.652	21.84	24.3222	21.0114	23.8466	Tb927.11.11330:mRNA-p1;Tb11.v5.1035.1-p1
		Tb927.11.3240	Tric complex zeta subunit (TCP-1-zeta)	Chaperone	1.01971	2.09658	0	429	20	20	20	42.5	42.5	42.5	59.579	0	85.945	1851200000	33	20.9962	19.1143	19.904	20.5105	22.8408	22.9529	20.5581	22.7253	Tb927.11.3240:mRNA-p1
		Tb927.10.12710	heat shock protein, HSP110	Chaperone	0.596713	1.97714	1	180	17	17	17	24.4	24.4	24.4	90.863	0	66.64	1308200000	37	20.3977	17.9951	19.2461	18.5948	22.18	22.7955	19.9518	22.4126	Tb927.10.12710:mRNA-p1
		Tb927.11.2650	heat shock protein 84, putative, mit HSp90	Chaperone	0.990252	1.96157	0	423	15	15	15	23.5	23.5	23.5	84.2	0	67.665	1022400000	29	20.4715	17.9165	19.2556	20.0745	21.5152	21.9385	20.0211	21.6047	Tb927.11.2650:mRNA-p1
		Tb927.1.3200	SGT1-like protein, cold-shock domain	Chaperone	0.80214	1.55179	2	147	4	4	4	23.1	23.1	23.1	24.493	0	48.171	423310000	10	20.027	18.2238	18.5878	20.3851	19.3377	21.7711	19.572	21.313	Tb927.1.3200:mRNA-p1
		Tb927.10.1060	Tric complex delta subunit (TCP-1-delta)	Chaperone	0.401741	1.32392	0	163	12	12	12	20.7	20.7	20.7	58.361	0	41.253	330100000	18	19.8057	17.728	19.3609	21.1143	17.8425	21.9095	19.4645	21.497	Tb927.10.1060:mRNA-p1
		Tb927.10.8230	protein disulfide isomerase,ERp57-like, cofactor wth calnexin, putative	Chaperone	0.254699	0.697529	0	109	10	10	10	27.6	27.6	27.6	55.579	0	32.946	591110000	12	20.7231	18.1044	20.9621	19.4655	21.0521	21.3644	20.6831	21.0633	Tb927.10.8230:mRNA-p1;Tb11.v5.0668.1-p1
		Tb927.10.10590	histone H2B	Chromatin	0.885309	2.21277	1	162	6	6	6	50.9	50.9	50.9	12.569	0	24.139	1518100000	18	20.1226	18.1812	19.4408	19.4294	22.4237	22.5299	19.7317	22.3042	Tb927.10.10590:mRNA-p1;Tb927.10.10580:mRNA-p1;Tb927.10.10570:mRNA-p1;Tb927.10.10560:mRNA-p1;Tb927.10.10550:mRNA-p1;Tb927.10.10540:mRNA-p1;Tb927.10.10530:mRNA-p1;Tb927.10.10520:mRNA-p1;Tb927.10.10510:mRNA-p1;Tb927.10.10500:mRNA-p1;Tb927.10.10490:mRNA-p1;Tb927.10.10480:mRNA-p1;Tb927.10.10470:mRNA-p1;Tb927.10.10460:mRNA-p1;Tb927.10.10445:mRNA-p1
		Tb927.10.14890	C-terminal motor kinesin KIFC1	Cytoskeleton	1.13936	3.50466	0	104	27	27	27	36	36	36	90.8	0	308.59	2734600000	59	20.1359	18.0928	17.7977	19.6993	23.219	23.6221	19.6647	23.2897	Tb927.10.14890:mRNA-p1;Tb11.v5.0636.1-p1
		Tb927.1.2390	beta tubulin	Cytoskeleton	1.07524	3.17195	4	90	15	15	15	33.3	33.3	33.3	49.704	0	120.87	2562100000	60	21.2719	17.3164	21.1598	22.2863	23.0254	23.9522	21.0434	23.532	Tb927.1.2390:mRNA-p1;Tb927.1.2370:mRNA-p1;Tb927.1.2350:mRNA-p1;Tb927.1.2330:mRNA-p1;Tb11.v5.0469.1-p1;Tb927.1.2410:pseudogenic_transcript-p1
		Tb927.3.930	OADalpha outer arm dynein heavy chain	Cytoskeleton	0.956507	2.58796	1	603	27	27	26	6.8	6.8	6.6	531.41	0	74.594	1263600000	39	19.5694	17.2899	20.1316	22.4652	22.5473	19.7423	19.7601	22.3325	Tb927.3.930:mRNA-p1
		Tb927.10.9570	paraflagellar rod protein PFC14	Cytoskeleton	1.01146	2.53262	1	323	25	25	25	29.1	29.1	29.1	118.67	0	202.59	1648600000	40	20.6963	18.8202	18.452	20.0122	22.3956	23.1585	20.2273	22.7508	Tb927.10.9570:mRNA-p1
		Tb927.3.4330	73 kDa paraflagellar rod protein. PFR1	Cytoskeleton	0.835395	2.34501	1	132	16	16	16	27.3	27.3	27.3	68.682	0	121.16	1824000000	30	20.4385	18.7644	19.0983	19.489	22.3157	23.5315	19.9895	23.08	Tb927.3.4330:mRNA-p1;Tb927.3.4320:mRNA-p1;Tb927.3.4310:mRNA-p1;Tb927.3.4300:mRNA-p1;Tb927.3.4290:mRNA-p1;Tb11.v5.1055.1-p1
		Tb927.11.7560	CMF15, T. brucei components of motile flagella (TbCMF15)	Cytoskeleton	0.701252	2.13178	1	484	18	18	18	28.6	28.6	28.6	67.695	0	56.623	1403100000	29	21.2029	17.7807	19.3821	19.6889	22.1726	22.8995	20.7324	22.4973	Tb927.11.7560:mRNA-p1
		Tb927.7.3550	WCB	Cytoskeleton	0.886738	1.99804	2	769	10	10	10	8.7	8.7	8.7	138.16	0	28.972	441710000	22	22.0824	19.2767	19.2827	23.1695	21.7686	21.6978	21.6067	22.7232	Tb927.7.3550:mRNA-p1
		Tb927.10.14990	intraflagellar transport protein IFT80/CHE2	Cytoskeleton	0.974799	1.33474	0	224	8	8	8	10.9	10.9	10.9	86.676	0	24.442	331240000	11	20.3456	18.5756	18.4111	20.4612	20.1473	20.7279	19.8807	20.507	Tb927.10.14990:mRNA-p1
		Tb927.10.13800	hypothetical protein, conserved, no yeast or human match	Cytoskeleton	0.408741	1.07657	4	199	15	15	15	38.3	38.3	38.3	46.281	0	54.606	1082200000	32	20.2676	21.1325	18.9043	19.357	22.1333	22.0438	20.7132	21.9151	Tb927.10.13800:mRNA-p1
		Tb927.11.5000	dynein intermediate chain IC78, putative	Cytoskeleton	0.523079	0.949924	0	450	6	6	6	9	9	9	73.293	0	10.369	242520000	10	20.4401	18.4633	17.8112	19.9925	19.6325	19.9395	19.9686	19.8812	Tb927.11.5000:mRNA-p1
		Tb927.10.15750	P197, tripartite attachment complex component	Cytoskeleton	0.139496	0.776178	7	85	15	15	15	30.5	30.5	30.5	183.78	0	35.543	423500000	32	23.8317	18.1961	20.2172	23.7689	21.2868	19.5178	23.3547	23.2932	Tb11.v5.0394.1-p1;Tb927.10.15750:mRNA-p1
		Tb927.4.1270	ruvB-like DNA helicase, putative	DNA	0.713687	0.974751	0	607	4	4	4	10.7	10.7	10.7	49.905	0	9.9948	193790000	9	19.698	17.6644	18.7186	20.0304	19.2982	19.6766	19.2678	19.765	Tb927.4.1270:mRNA-p1
		Tb927.10.6060	UMSBP2 Telomere-binding	DNA	0.153678	0.181543	11	70	15	15	14	97.2	97.2	97.2	21.836	0	285.27	41780000000	278	26.3398	26.693	26.8987	26.3149	26.5245	27.6368	26.7001	27.2108	Tb927.10.6060:mRNA-p1;Tb11.v5.0199.1-p1
		Tb10.v4.0101	ESAG pseudogene	ESAG.pseudo	0.652903	0.807198	0	58	2	2	2	14.7	14.7	14.7	25.909	0	9.6172	395630000	6	19.9834	18.4149	19.4485	19.7204	20.7214	19.8266	19.6265	20.3332	Tb10.v4.0101:pseudogenic_transcript-p1;Tb05.5K5.500:pseudogenic_transcript-p1;Tb08.27P2.160:pseudogenic_transcript-p1;Tb08.27P2.250:pseudogenic_transcript-p1;Tb927.3.460:pseudogenic_transcript-p1
		Tb927.1.3830	glucose-6-phosphate isomerase, glycosomal (PGI)	Glucose.glycerol	1.26125	3.99414	1	150	24	24	24	43.3	43.3	43.3	67.614	0	220.92	4286900000	54	20.1665	18.1039	17.9264	20.1331	23.8457	24.2004	19.6956	23.8822	Tb927.1.3830:mRNA-p1
		Tb927.10.5620	fructose-bisphosphate aldolase, glycosomal (ALD)	Glucose.glycerol	1.0671	3.76215	3	95	34	34	34	77.7	77.7	77.7	41.071	0	323.31	18874000000	125	21.9786	19.0791	23.1188	22.8945	26.0217	26.5467	22.6721	26.1832	Tb927.10.5620:mRNA-p1;Tb11.v5.0531.1-p1
		Tb927.6.4300	glyceraldehyde 3-phosphate dehydrogenase, glycosomal (GAPDH)	Glucose.glycerol	1.08034	3.64426	8	728	33	33	31	87.2	87.2	85	39.047	0	323.31	33808000000	172	20.3692	22.0437	24.7761	24.1808	26.9336	27.0073	24.2998	26.7963	Tb927.6.4300:mRNA-p1;Tb927.6.4280:mRNA-p1
		Tb927.3.3270	ATP-dependent phosphofructokinase (TbPFK)	Glucose.glycerol	1.06541	3.30762	16	565	51	51	51	88.3	88.3	88.3	53.517	0	323.31	35609000000	277	25.3567	20.7444	23.0655	25.1742	27.0464	26.8689	24.8818	26.794	Tb927.3.3270:mRNA-p1
		Tb927.9.12630	glycerol kinase, glycosomal (glk1)	Glucose.glycerol	0.823199	3.10794	2	894	31	31	31	70.9	70.9	70.9	56.426	0	323.31	5841900000	85	20.5099	17.6787	21.0424	20.4133	22.8662	25.2753	20.6772	24.7999	Tb927.9.12630:mRNA-p1;Tb927.9.12590:mRNA-p1;Tb927.9.12570:mRNA-p1;Tb927.9.12550:mRNA-p1;Tb927.9.12610:mRNA-p1
		Tb927.10.2010	hexokinase (HK1)	Glucose.glycerol	0.645116	2.40014	2	245	25	25	0	57.7	57.7	0	51.295	0	157.41	3198500000	51	20.4126	18.9261	20.0602	19.1657	22.7349	24.6987	20.1048	24.2263	Tb927.10.2010:mRNA-p1
		Tb927.2.4210	glycosomal phosphoenolpyruvate carboxykinase (PEPCK)	Glucose.glycerol	0.862361	2.04419	0	526	20	20	20	50.9	50.9	50.9	58.564	0	106.43	1432300000	28	19.7836	17.9877	19.9526	19.4906	22.3917	21.9741	19.703	22.0556	Tb927.2.4210:mRNA-p1
		Tb927.8.3530	glycerol-3-phosphate dehydrogenase (NAD), glycosomal	Glucose.glycerol	0.463654	2.03685	2	832	12	12	12	50	50	50	37.805	0	94.462	3114500000	40	20.1462	18.0164	21.6647	18.8352	23.3393	23.7633	21.2006	23.4251	Tb927.8.3530:mRNA-p1
		Tb927.10.6880	glyceraldehyde 3-phosphate dehydrogenase, cytosolic (GAP)	Glucose.glycerol	0.629101	1.98008	1	93	10	8	8	27.8	23.3	23.3	35.61	0	37.157	1411800000	16	20.612	19.0655	19.1604	18.9549	22.6745	23.1488	20.1618	22.7973	Tb927.10.6880:mRNA-p1;Tb11.v5.0516.1-p1
		Tb927.10.14140	pyruvate kinase 1 (PYK1)	Glucose.glycerol	1.13431	1.7938	7	204	34	34	34	86.2	86.2	86.2	54.423	0	323.31	20138000000	187	24.1718	22.8211	24.5696	24.6027	26.173	26.1682	24.2441	26.0003	Tb927.10.14140:mRNA-p1;Tb11.v5.0605.1-p1
		Tb927.9.8720	fructose-1,6-bisphosphatase (FBPase)	Glucose.glycerol	1.15244	1.54013	0	944	7	7	7	26.3	26.3	26.3	38.534	0	34.392	431940000	11	19.9719	18.1083	19.7858	20.4108	21.022	21.0536	19.7162	20.9104	Tb927.9.8720:mRNA-p1
		Tb927.10.2890	enolase	Glucose.glycerol	0.678257	1.11464	0	107	6	6	6	17.5	17.5	17.5	46.592	0	30.009	378190000	10	20.0796	17.9061	18.9895	19.4476	20.0282	20.8432	19.6391	20.4429	Tb927.10.2890:mRNA-p1;Tb11.v5.0650.1-p1
		Tb927.11.5520	triosephosphate isomerase (TIM)	Glucose.glycerol	0.191815	0.912904	1	459	10	10	10	51.2	51.2	51.2	26.819	0	86.219	1722300000	21	20.1898	18.2553	20.3527	17.3644	23.1746	20.9976	20.1048	22.7004	Tb927.11.5520:mRNA-p1
		Tb927.11.7380	glycerol-3-phosphate dehydrogenase (FAD-dependent), mitochondrial, TAO complex	Glucose.glycerol	0.151683	0.571949	0	479	14	14	14	29.5	29.5	29.5	66.991	0	52.949	1034200000	26	21.1571	18.7914	20.8498	18.5437	21.4045	22.566	20.8552	22.1178	Tb927.11.7380:mRNA-p1
		Tb927.9.9820	glyceraldehyde-3-phosphate dehydrogenase, putative	Glucose.glycerol	0.00229725	-0.00521406	0	959	7	7	7	33.2	33.2	33.2	38.802	0	55.99	177480000	10	20.3636	18.762	18.9782	18.8662	18.7695	20.4525	19.9143	19.9952	Tb927.9.9820:mRNA-p1
		Tb927.5.890	oligosaccharyl transferase subunit, putative	Glycans	0.686783	1.69134	0	701	13	13	5	20.1	20.1	8.9	89.347	0	87.39	1500500000	22	20.4625	18.096	20.2811	20.6741	22.9365	20.303	20.2062	22.4628	Tb927.5.890:mRNA-p1
		Tb927.5.900	oligosaccharyl transferase subunit, putative	Glycans	0.580601	0.849881	0	702	12	4	4	17.1	6.1	6.1	92.232	0	87.506	444570000	9	19.8567	18.1269	19.8213	19.9251	20.736	19.6933	19.6675	20.3542	Tb927.5.900:mRNA-p1;Tb927.5.910:mRNA-p1;Tb11.v5.0559.1-p1
		Tb927.2.2520	Mitochondrial outer membrane protein porin 2	Ions	0.968907	2.1411	0	518	5	5	5	16.3	16.3	16.3	29.189	0	45.444	604840000	9	19.2403	17.3341	18.6433	18.9981	22.0031	20.6399	18.8654	21.5448	Tb927.2.2520:mRNA-p1;Tb927.2.2510:mRNA-p1
		Tb927.5.3400	calcium-translocating P-type ATPase, calcium pump	Ions	0.614976	0.859543	0	691	11	11	11	13.3	13.3	13.3	110.32	0	23.744	435680000	12	20.2567	19.2117	18.4108	19.7025	20.7934	19.962	19.8227	20.4057	Tb927.5.3400:mRNA-p1
		Tb927.9.4210	fatty acyl CoA synthetase 3 (ACS3)	Lipids	1.21941	3.17198	2	924	19	19	19	33.2	33.2	33.2	77.853	0	134.74	2771700000	53	21.3476	18.3458	18.6808	21.1845	22.8968	23.8088	20.8718	23.3828	Tb927.9.4210:mRNA-p1;Tb927.9.4230:mRNA-p1;Tb11.v5.0561.1-p1
		Tb927.9.4190	fatty acyl CoA syntetase 1 (ACS1)	Lipids	0.338811	0.437284	0	923	7	7	7	10.2	10.2	10.2	78.959	0	33.831	429170000	11	20.798	19.1103	20.2397	20.4076	20.1952	20.857	20.4338	20.5767	Tb927.9.4190:mRNA-p1
		Tb927.10.3260	Long-chain-fatty-acid--CoA ligase 5, Acyl-CoA synthetase 5 (LACS 5)	Lipids	0.254614	0.285582	0	257	7	7	7	13.1	13.1	13.1	78.983	0	14.978	263110000	10	20.5202	19.0083	19.5969	19.9915	19.874	20.1167	20.1038	20.0053	Tb927.10.3260:mRNA-p1
		Tb927.11.11690	Vacuolar proton pump subunit B, putative	Lysosome	0.764197	1.92288	0	349	14	14	14	35.4	35.4	35.4	55.619	0	42.655	987680000	25	20.7494	19.2611	18.0951	19.5887	21.8646	22.421	20.2871	22.0508	Tb927.11.11690:mRNA-p1
		Tb927.10.6070	UMSBP1	Mito.DNA	0.257018	-0.390212	9	286	11	10	10	74.3	74.3	74.3	14.566	0	183.6	34445000000	174	26.5888	26.8459	27.4397	25.601	26.6017	27.501	27.1074	27.0803	Tb927.10.6070:mRNA-p1
		Tb927.7.7430	ATP synthase F1, alpha subunit (ATPF1A)	Mito.e.transport	0.717718	1.25658	0	798	8	8	8	15.2	15.2	15.2	63.502	0	73.199	676450000	11	20.7057	18.4532	18.9957	20.2244	21.4901	20.2099	20.2394	21.057	Tb927.7.7430:mRNA-p1;Tb927.7.7420:mRNA-p1
		Tb927.3.1120	Ran or RTB2	Nuclear.transport	0.433599	1.45862	2	546	12	12	12	53.9	53.9	53.9	24.406	0	77.203	1567900000	22	20.3416	18.102	21.7461	19.9899	21.2461	23.3295	21.2858	22.8562	Tb927.3.1120:mRNA-p1
		Tb927.11.3650	adenylosuccinate synthetase, putative	Nucleotides	0.908297	3.29251	1	88	23	23	23	43	43	43	66.674	0	191.37	2443700000	41	20.2966	16.8779	18.5267	19.1115	23.215	23.2521	19.827	23.0579	Tb927.11.3650:mRNA-p1;Tb11.v5.0435.1-p1
		Tb927.5.4560	guanine deaminase, putative	Nucleotides	0.216364	0.583797	2	51	11	11	11	26.6	26.6	26.6	55.321	0	94.745	576990000	19	20.729	18.7798	19.4801	18.8853	19.959	21.8961	20.2803	21.4244	Tb927.5.4560:mRNA-p1;Tb11.v5.0409.1-p1;Tb05.5K5.200:mRNA-p1
		Tb927.10.1390	hypoxanthine-guanine phosphoribosyltransferase, putative	Nucleotides	0.404038	0.579847	0	201	6	6	6	32.1	32.1	32.1	26.36	0	25.436	367650000	13	20.4915	18.8186	20.0517	19.7176	20.4885	20.8953	20.1557	20.582	Tb927.10.1390:mRNA-p1
		Tb927.8.4430	uridine phosphorylase	Nucleotides	0.31097	0.515427	0	839	7	7	7	23.2	23.2	23.2	36.925	0	15.287	224140000	13	20.1716	18.093	19.8431	20.2508	19.5445	19.8586	19.8641	19.9783	Tb927.8.4430:mRNA-p1
		Tb927.5.3170	ribose-phosphate pyrophosphokinase, putative (PRPS5)	PPP	0.324127	0.742414	0	688	8	8	8	13.3	13.3	13.3	73.305	0	22.709	214480000	11	20.4092	17.4438	19.3095	20.4853	19.6785	19.2258	19.9657	20.0914	Tb927.5.3170:mRNA-p1
		Tb927.8.8330	calpain, putative,cysteine peptidase, putative	Protease	1.13902	3.7332	3	871	20	20	20	26.7	26.7	26.7	98.456	0	144.41	3167000000	54	22.3481	17.0726	19.3393	23.4635	23.5776	22.9185	21.8714	23.3989	Tb927.8.8330:mRNA-p1
		Tb927.3.4790	aminopeptidase, putative,metallo-peptidase, Clan MA(E) Family M1	Protease	0.953773	2.27401	0	581	12	12	12	14.7	14.7	14.7	97.251	0	49.75	756630000	21	20.6268	16.8743	19.0415	20.6393	21.2482	21.477	20.1609	21.2394	Tb927.3.4790:mRNA-p1;Tb927.3.4750:mRNA-p1
		Tb927.11.3570	aminopeptidase, putative,metallo-peptidase, Clan MA(E) Family M1	Protease	0.663722	0.937257	0	436	16	16	16	21.2	21.2	21.2	98.098	0	68.786	543550000	20	19.5115	19.3675	20.4582	19.6733	20.9894	21.4863	20.0582	21.1343	Tb927.11.3570:mRNA-p1
		Tb927.10.14790	aminopeptidase, putative,metallo-peptidase, Clan MG, Family M24	Protease	0.497396	0.764494	0	217	5	5	5	12.8	12.8	12.8	42.69	0	8.1504	255980000	9	20.4461	18.172	19.0129	20.168	19.897	19.8595	19.987	19.9978	Tb927.10.14790:mRNA-p1
		Tb927.11.4610	protein kinase A regulatory subunit (PKA-R)	Protein.kinase	0.717969	2.18437	0	99	16	16	16	38.3	38.3	38.3	56.734	0	146.4	1308800000	25	19.6827	17.5027	19.3053	18.5876	22.0545	22.4017	19.3597	22.0858	Tb927.11.4610:mRNA-p1;Tb11.v5.0587.1-p1
		Tb927.10.5140	protein kinase, putative,mitogen-activated protein kinase 2, putative	Protein.kinase	0.402969	0.861455	0	274	12	12	12	32.1	32.1	32.1	49.74	0	41.092	539100000	16	20.1704	18.0174	20.4687	19.4672	20.872	20.9017	20.1696	20.7192	Tb927.10.5140:mRNA-p1
		Tb927.6.1800	protein phosphatase 2C, putative	Protein.phosphatase	0.527904	1.02463	0	705	6	6	6	20.7	20.7	20.7	41.135	0	25.174	222810000	8	20.1549	17.2402	19.0853	19.9407	19.9034	19.7102	19.7138	19.8625	Tb927.6.1800:mRNA-p1
		Tb927.8.1990	mitochondrial peroxiredoxin (TRYP2)	Redox	0.716454	2.08662	0	818	6	6	6	31.9	31.9	31.9	25.631	0	22.018	1099100000	16	20.5593	16.9988	19.455	19.4834	22.1342	21.6553	20.1152	21.7823	Tb927.8.1990:mRNA-p1
		Tb927.1.120	retrotransposon hot spot protein 4 (RHS4), putative	RHS	0.770869	2.97656	5	134	21	21	3	24.3	24.3	3.6	98.024	0	84.965	2815900000	42	23.3701	17.5875	18.7831	23.2443	22.9872	22.4389	22.893	23.0001	Tb927.1.120:mRNA-p1
		Tb11.v5.0713	retrotransposon hot spot (RHS) protein, putative	RHS	1.28319	1.83483	0	112	10	10	5	14.4	14.4	8.1	78.342	0	19.215	630210000	19	19.8987	18.2173	18.3332	19.8933	21.22	20.8405	19.442	20.9085	Tb11.v5.0713.1-p1
		Tb927.2.100	retrotransposon hot spot protein 1 (RHS1), putative	RHS	0.63059	1.63112	1	513	12	12	1	14.7	14.7	0.8	94.932	0	37.652	1122700000	24	20.8939	18.434	19.3428	19.3581	21.9857	22.2203	20.4303	21.9429	Tb927.2.100:mRNA-p1
		Tb927.11.6300	40S ribosomal protein S5	Ribosome	1.12829	4.9174	2	467	13	13	13	57.9	57.9	57.9	21.386	0	240.95	7135700000	38	23.3104	16.7635	19.8328	26.022	25.2703	23.3665	22.8334	25.6165	Tb927.11.6300:mRNA-p1
		Tb927.11.8200	40S ribosomal protein S26	Ribosome	0.5673	3.17752	4	493	8	8	8	57.7	57.7	57.7	12.806	0	41.386	6771600000	55	25.5377	17.3457	20.51	25.165	24.8656	22.8953	25.0606	24.8661	Tb927.11.8200:mRNA-p1
		Tb927.9.15170	60S ribosomal protein L5	Ribosome	0.960221	3.02731	0	907	13	13	13	50.3	50.3	50.3	34.636	0	58.828	3387800000	31	20.6857	17.2154	20.6233	20.7237	23.8045	23.0783	20.4796	23.4024	Tb927.9.15170:mRNA-p1;Tb927.9.15110:mRNA-p1
		Tb927.11.3600	40S ribosomal protein S4	Ribosome	0.846104	2.96475	2	133	24	24	24	66.3	66.3	66.3	30.644	0	67.465	5255400000	54	21.0703	17.7089	21.2864	20.9639	23.0761	24.9198	21.0156	24.4489	Tb927.11.3600:mRNA-p1;Tb927.11.3590:mRNA-p1;Tb11.v5.1059.1-p1
		Tb927.4.2180	60S ribosomal protein L35a	Ribosome	1.01773	2.87229	0	622	10	10	10	45.6	45.6	45.6	17.021	0	19.602	4382000000	16	19.6468	18.361	19.6339	20.0364	24.3632	21.859	19.4756	23.8874	Tb927.4.2180:mRNA-p1
		Tb927.11.14020	RNA-binding protein (NRBD2)	Ribosome	1.11841	2.64663	1	368	12	12	12	43.4	43.4	43.4	30.274	0	59.106	3540700000	34	19.3733	19.7539	20.0533	20.2007	23.7016	23.2182	19.8094	23.3479	Tb927.11.14020:mRNA-p1;Tb927.11.14000:mRNA-p1
		Tb927.11.10910	40S ribosomal protein SA	Ribosome	1.0218	2.62185	2	339	12	12	12	46.7	46.7	46.7	27.609	0	114.28	7780800000	42	20.1328	21.6167	23.2957	22.9743	24.2448	25.6918	22.8279	25.2307	Tb927.11.10910:mRNA-p1;Tb927.11.10790:mRNA-p1
		Tb927.10.5340	40S ribosomal protein S18	Ribosome	0.950642	2.46892	3	74	9	9	9	45.8	45.8	45.8	17.51	0	92.965	1064100000	21	22.3899	18.428	19.2991	22.8631	22.3767	22.2838	21.9131	22.5873	Tb927.10.5340:mRNA-p1;Tb927.10.5330:mRNA-p1;Tb11.v5.1060.1-p1;Tb11.v5.0243.1-p1
		Tb927.10.3940	40S ribosomal protein S3A	Ribosome	0.733741	2.32118	0	92	15	15	15	47.7	47.7	47.7	29.422	0	137.6	1897300000	25	20.2939	17.1491	19.8451	19.355	22.9202	21.9763	19.9492	22.49	Tb927.10.3940:mRNA-p1;Tb927.10.3930:mRNA-p1;Tb11.v5.0501.1-p1
		Tb927.8.1110	40S ribosomal protein S9 190aa, 22KDa	Ribosome	0.723012	2.32022	0	280	10	10	10	55.8	55.8	55.8	22.051	0	56.965	3627900000	20	21.2283	18.5447	19.0881	21.935	24.0542	19.8326	20.7552	23.5804	Tb927.8.1110:mRNA-p1;Tb927.10.5610:mRNA-p1
		Tb927.10.1090	40S ribosomal protein S23	Ribosome	1.09397	2.18588	1	165	6	6	6	54.5	54.5	54.5	15.928	0	34.273	1504200000	21	20.7532	18.0299	19.2344	20.7262	22.4785	21.3703	20.2898	22.0411	Tb927.10.1090:mRNA-p1;Tb927.10.1080:mRNA-p1
		Tb927.10.11390	60S ribosomal protein L6	Ribosome	1.04394	2.04658	0	169	8	8	8	46.4	46.4	46.4	21.185	0	46.482	1220800000	13	20.6169	19.039	18.8848	20.1079	22.0779	22.4946	20.1589	22.1596	Tb927.10.11390:mRNA-p1
		Tb927.5.1110	60S ribosomal protein L2 L8	Ribosome	1.11142	1.84091	0	395	6	6	6	27.7	27.7	27.7	28.314	0	25.572	782200000	14	19.5045	17.5051	19.5126	20.0859	21.4443	20.5148	19.3346	21.0322	Tb927.5.1110:mRNA-p1;Tb927.11.16280:mRNA-p1
		Tb927.3.3320	60S ribosomal protein L13	Ribosome	0.285483	1.78384	0	567	10	10	10	38.5	38.5	38.5	25.427	0	57.057	319180000	31	21.3127	17.8775	19.5868	25.8632	20.1396	18.1258	20.8439	25.3861	Tb927.3.3320:mRNA-p1;Tb927.3.3310:mRNA-p1
		Tb927.7.240	40S ribosomal protein S33	Ribosome	1.25715	1.67456	2	760	2	2	2	13.6	13.6	13.6	11.17	0	12.658	636700000	12	20.2351	18.1949	19.3796	20.9111	20.6115	21.3105	19.8181	21.0372	Tb927.7.240:mRNA-p1;Tb927.7.230:mRNA-p1
		Tb927.11.14130	60S ribosomal protein L18	Ribosome	0.595133	1.42347	0	263	7	7	7	37.4	37.4	37.4	20.904	0	43.419	726980000	15	19.5476	17.4424	18.9395	18.8639	21.7511	19.5849	19.1689	21.2775	Tb927.11.14130:mRNA-p1;Tb927.10.3840:mRNA-p1
		Tb927.7.1050	40S ribosomal protein S16	Ribosome	0.662907	1.32412	1	746	6	6	6	39.6	39.6	39.6	16.998	0	10.304	587700000	8	20.8656	17.9595	19.3753	20.088	21.248	20.8368	20.4029	20.9344	Tb927.7.1050:mRNA-p1;Tb927.7.1040:mRNA-p1
		Tb927.10.5370	40S ribosomal protein S10	Ribosome	0.0470491	0.0944672	5	276	14	14	14	64	64	64	19.285	0	144.28	6403700000	63	23.9465	22.8796	24.6691	23.0267	24.3902	24.3617	24.2732	24.2097	Tb927.10.5370:mRNA-p1;Tb927.10.5360:mRNA-p1
		Tb927.3.870	SLBP2, like histone RNA hairpin binding proteins, binds to EIF4E2	RNA.binding	0.829918	2.61076	0	601	18	18	18	48.4	48.4	48.4	47.873	0	134.99	1892800000	33	20.3838	17.9849	18.5471	19.0927	23.2242	22.4311	19.9146	22.812	Tb927.3.870:mRNA-p1
		Tb927.10.13720	RBP29	RNA.binding	0.988689	2.51045	4	197	15	15	15	31.6	31.6	31.6	40.678	0	67.552	2821300000	30	20.477	18.1123	20.4103	20.4644	23.5224	22.5442	20.2699	23.0891	Tb927.10.13720:mRNA-p1
		Tb927.11.14090	DRBD18	RNA.binding	0.780863	2.46928	2	369	15	15	15	37.9	37.9	37.9	51.674	0	79.452	2207600000	40	19.8991	18.3879	19.551	19.0465	22.574	23.6253	19.5921	23.1852	Tb927.11.14090:mRNA-p1
		Tb927.3.1030	RBP28	RNA.binding	0.882308	2.32778	2	544	12	12	12	45.1	45.1	45.1	39.272	0	127.29	1074900000	31	20.0654	17.7593	19.2706	19.3962	21.8236	22.8587	19.6547	22.42	Tb927.3.1030:mRNA-p1
		Tb927.11.14100	DRBD4 (PTB2)	RNA.binding	0.665285	2.15277	0	370	8	8	8	24.2	24.2	24.2	54.707	0	46.274	2138900000	20	19.6371	18.1412	20.1244	18.7747	22.7256	22.8607	19.7731	22.6223	Tb927.11.14100:mRNA-p1
		Tb927.6.2550	TRRM2	RNA.binding	1.0105	2.12617	0	713	12	12	12	19.3	19.3	19.3	82.867	0	82.677	917470000	21	20.325	17.4582	19.3458	20.136	21.7138	21.6577	19.8917	21.5166	Tb927.6.2550:mRNA-p1
		Tb927.11.4460	ALBA1	RNA.binding	0.906737	1.56201	0	444	7	7	7	47.2	47.2	47.2	14.038	0	92.123	942970000	17	19.4271	20.0413	18.863	19.5505	21.6777	21.7893	19.6813	21.5624	Tb927.11.4460:mRNA-p1
		Tb927.11.14950	ZFP2	RNA.binding	0.497188	1.42545	1	382	4	4	4	59.7	59.7	59.7	15.767	0	20.316	1675300000	11	20.2048	18.3339	19.0084	18.79	22.6667	20.3667	19.7599	22.1918	Tb927.11.14950:mRNA-p1
		Tb927.3.3940	DRBD11	RNA.binding	0.777972	1.17719	3	575	7	7	7	20.7	20.7	20.7	61.716	0	35.645	522430000	18	20.7426	19.1847	18.6816	20.4662	20.3282	21.346	20.281	20.9581	Tb927.3.3940:mRNA-p1
		Tb927.9.8740	DRBD3 (PTB1)	RNA.binding	0.550739	0.929562	9	945	18	18	18	44.3	44.3	44.3	36.984	0	323.31	21913000000	102	23.9272	25.6097	24.6056	24.655	25.6639	26.6123	25.1818	26.1858	Tb927.9.8740:mRNA-p1
		Tb927.8.2780	RBP10	RNA.binding	0.693041	0.826721	3	828	6	6	6	32	32	32	32.195	0	25.846	579000000	14	20.8017	19.9161	19.5447	20.2138	20.9474	21.5815	20.3985	21.2099	Tb927.8.2780:mRNA-p1
		Tb927.10.5250	ZC3H32	RNA.binding	0.159699	0.171124	0	275	8	8	8	11.5	11.5	11.5	72.04	0	12.544	260370000	10	19.9025	18.6351	19.7093	19.4416	19.7139	19.6048	19.6545	19.6008	Tb927.10.5250:mRNA-p1;Tb11.v5.0232.1-p1
		Tb927.9.13990	DRBD2	RNA.binding	0.0702196	-0.24527	6	901	13	13	13	44.3	44.3	44.3	34.618	0	72.205	3224900000	48	22.2104	23.1733	21.7331	19.8566	22.9879	23.5365	22.7551	23.1676	Tb927.9.13990:mRNA-p1
		Tb927.7.3730	RBP26	RNA.binding	0.3107	-0.475651	2	770	5	5	5	15.6	15.6	15.6	36.384	0	10.643	203170000	8	20.691	19.4948	18.9965	19.1683	18.6548	19.9323	20.2489	19.5433	Tb927.7.3730:mRNA-p1
		Tb927.9.9520	ZC3H29	RNA.binding	0.0626516	-0.508201	3	952	10	10	10	25.8	25.8	25.8	37.741	0	33.16	4204700000	25	19.9165	23.197	27.683	19.8143	25.4872	23.9704	27.2059	25.0231	Tb927.9.9520:mRNA-p1
		Tb927.10.3990	DHH1	RNA.degradation	0.664641	3.34228	1	264	27	27	27	69.2	69.2	69.2	46.468	0	166.29	6334400000	67	20.8912	17.0852	20.1666	18.8149	24.463	24.8919	20.4892	24.5523	Tb927.10.3990:mRNA-p1
		Tb927.10.1510	NOT1	RNA.degradation	0.786773	2.7922	4	226	31	31	31	17.2	17.2	17.2	259.12	0	198.43	1093300000	66	20.8749	17.209	18.7622	23.9551	21.6251	19.6425	20.4012	23.48	Tb927.10.1510:mRNA-p1
		Tb927.10.1490	MKT1L	RNA.degradation	1.16301	2.41201	0	220	19	19	19	17.8	17.8	17.8	134.81	0	124.56	1024400000	42	20.4801	17.7487	20.3189	22.2732	22.3995	21.111	20.2313	22.1774	Tb927.10.1490:mRNA-p1
		Tb927.11.550	SCD6	RNA.degradation	0.114927	-0.425342	4	458	12	12	12	59.6	59.6	59.6	31.292	0	170.98	2123200000	45	22.923	20.8246	23.2233	20.0251	21.7955	23.8744	22.9237	23.4009	Tb927.11.550:mRNA-p1
		Tb927.10.540	ATP-dependent DEAD/H RNA helicase, Named as orthologue of TcSUB2, RNAi causes poly(A) accumulation in nucleus.	RNA.helicase	1.20889	2.7746	1	86	15	15	15	38.1	38.1	38.1	49.226	0	56.987	1404700000	26	19.6187	18.0488	19.2018	20.0172	21.7969	23.379	19.2908	22.9133	Tb927.10.540:mRNA-p1;Tb11.v5.0414.1-p1
		Tb927.8.900	splicing factor TSR1 (TSR1)	RNA.processing	0.976172	2.96461	4	873	13	13	13	38.7	38.7	38.7	37.469	0	53.846	3576800000	38	22.0393	17.681	20.5472	23.0833	24.1201	21.9577	21.5759	23.6839	Tb927.8.900:mRNA-p1
		Tb927.2.4710	TRRM1	RNA.processing	0.681003	2.59808	6	529	19	19	19	45.1	45.1	45.1	49.983	0	87.696	3681000000	79	23.4145	18.7802	19.9587	24.5054	24.1906	21.2517	22.9376	24.2	Tb927.2.4710:mRNA-p1
		Tb927.2.5240	PRP19	RNA.processing	0.428913	0.776213	0	532	4	4	4	9	9	9	54.268	0	44.2	352250000	10	20.1946	18.4462	19.3813	19.0695	20.1853	21.0959	19.7862	20.6727	Tb927.2.5240:mRNA-p1
		Tb927.2.3880	HNRNPH/F	RNA.processing	0.0167123	0.0490411	7	524	13	13	13	28.3	28.3	28.3	55.134	0	39.625	488280000	22	19.6471	21.5816	18.879	18.9877	20.5843	20.6829	21.1104	20.4651	Tb927.2.3880:mRNA-p1
		Tb927.3.5620	FACT complex subunit SPT16	RNA.synthesis	0.144257	0.200797	0	596	11	11	11	12.1	12.1	12.1	113.69	0	34.627	276120000	13	20.158	18.5919	19.3439	19.1173	19.9816	19.5973	19.753	19.6947	Tb927.3.5620:mRNA-p1
		Tb927.10.14810	Homologue of yeast MBF1 - Transcriptional coactivator that bridges the DNA-binding region of Gcn4p and TATA-binding protein Spt15p; suppressor of frameshift mutations. Pedominantly in yeast cytosol. multiprotein binding factor and helix-turn-helix domain. (in UPF1-TAP)	RNA.synthesis	0.121731	0.187748	1	218	3	3	3	15	15	15	17.974	0	3.8329	147010000	6	20.0368	18.5109	18.5543	18.8223	19.1442	19.6987	19.5861	19.3713	Tb927.10.14810:mRNA-p1
		Tb927.11.4900	guanine nucleotide-binding beta subunit-like protein,WD40/YVTN repeat-like-containing protein	Signalling	1.26027	2.58916	0	448	16	16	16	26.2	26.2	26.2	61.857	0	47.046	1609400000	35	20.1718	17.9816	19.3564	20.3248	22.3324	22.6202	19.7589	22.325	Tb927.11.4900:mRNA-p1
		Tb927.11.9530	14-3-3-I protein	Signalling	0.923656	2.55192	2	506	12	12	12	46.6	46.6	46.6	30.31	0	323.31	1747200000	24	20.2437	18.0208	20.6254	20.2399	22.7146	23.5912	20.2998	23.1684	Tb927.11.9530:mRNA-p1
		Tb927.11.6870	14-3-3 protein	Signalling	0.31551	0.772828	0	474	10	10	10	39.7	39.7	39.7	29.196	0	24.72	549150000	15	19.6145	19.2681	19.4842	18.7095	19.8691	22.1066	19.4781	21.6322	Tb927.11.6870:mRNA-p1
		Tb927.10.4570	EF2 elongation factor 2	Translation	1.13853	4.79177	5	269	43	43	43	61.9	61.9	61.9	94.333	0	323.31	8736400000	124	19.633	16.6115	23.2509	23.745	24.7105	25.4153	22.7739	25.0241	Tb927.10.4570:mRNA-p1;Tb927.10.4560:mRNA-p1
		Tb927.11.13190	EF1 gamma, elongation factor 1 gamma, putative	Translation	1.07898	3.60465	2	358	21	21	21	56.9	56.9	56.9	46.275	0	155.52	3727900000	47	19.7065	17.2957	20.0765	20.0278	24.1242	23.7407	19.7542	23.7974	Tb927.11.13190:mRNA-p1;Tb927.11.13090:mRNA-p1
		Tb927.11.11370	guanine nucleotide-binding protein beta subunit- like protein (TRACK)	Translation	0.918379	2.83273	8	345	15	15	15	63.5	63.5	63.5	34.69	0	217.73	3222500000	40	20.1072	23.2424	18.3899	22.9413	23.5751	23.7213	22.7656	23.5184	Tb927.11.11370:mRNA-p1;Tb927.11.11360:mRNA-p1
		Tb927.11.6160	ERF3 eukaryotic release factor 3, putative	Translation	1.10009	1.95544	0	462	18	18	18	25.1	25.1	25.1	76.914	0	76.162	958890000	29	20.3989	18.6721	19.4902	20.2484	21.6209	22.5582	19.9795	22.1305	Tb927.11.6160:mRNA-p1
		Tb927.5.3450	eukaryotic translation initiation factor eIF2A, putative	Translation	0.628952	1.79251	0	692	6	6	6	15	15	15	57.992	0	122.3	861150000	13	20.239	17.6237	18.8379	18.6497	21.402	22.0264	19.7798	21.6419	Tb927.5.3450:mRNA-p1
		Tb927.8.4500	eIF4G5	Translation	0.800472	1.66529	0	841	15	15	15	24.8	24.8	24.8	84.574	0	91.431	750290000	25	21.0177	18.2667	19.1729	21.1374	22.0567	20.259	20.5475	21.6351	Tb927.8.4500:mRNA-p1;Tb11.v5.0763.1-p1
		Tb927.11.10560	eIF4G4	Translation	1.18541	1.66137	0	335	11	11	11	15.2	15.2	15.2	79.7	0	36.786	463460000	16	19.69	17.6741	18.8921	20.2689	20.9916	19.9798	19.2807	20.624	Tb927.11.10560:mRNA-p1
		Tb927.7.1670	eIF4E6	Translation	0.777865	1.58141	0	752	8	8	8	58.1	58.1	58.1	20.864	0	42.234	663290000	14	19.9222	17.7254	19.7142	19.4583	21.3851	21.2626	19.6561	21.155	Tb927.7.1670:mRNA-p1
		Tb927.8.5880	eIF1A	Translation	0.54203	1.46601	0	854	3	3	3	21.5	21.5	21.5	19.445	0	8.3944	363260000	5	20.9437	16.939	19.0284	20.5495	20.8899	19.8698	20.4719	20.6037	Tb927.8.5880:mRNA-p1
		Tb927.10.14550	DED1-1, ATP-dependent DEAD/H RNA helicase, VASA homologue; strongest yeast match is to DBP1	Translation	0.321524	1.31366	8	212	19	18	18	35.3	35.3	35.3	66.588	0	189.47	1533100000	51	24.3036	21.312	18.8674	23.3889	21.6456	23.3894	23.8269	23.217	Tb927.10.14550:mRNA-p1
		Tb927.7.6090	eIF3a	Translation	0.516646	1.03118	0	790	21	21	21	28.5	28.5	28.5	88.162	0	125.82	774860000	32	21.252	18.7888	19.7852	20.0345	21.1179	21.7671	20.7909	21.3844	Tb927.7.6090:mRNA-p1
		Tb927.11.14590	G5-IP eIF4G5 interacting protein	Translation	0.616036	1.00699	0	380	10	10	10	20.7	20.7	20.7	70.339	0	34.581	509980000	25	20.7298	18.4121	19.9037	20.2923	20.542	21.2323	20.3149	20.8754	Tb927.11.14590:mRNA-p1
		Tb927.6.4370	eIF3d	Translation	0.380655	0.887893	2	730	10	10	10	26.3	26.3	26.3	57.974	0	63.082	1074900000	17	19.8025	20.3758	20.7487	19.3415	21.8543	22.395	20.4582	22.028	Tb927.6.4370:mRNA-p1
		Tb927.11.7100	MCT1/TMA20 homologue, similar to N-terminus of eIF2D	Translation	0.191905	-0.361912	0	476	2	2	2	8.9	8.9	8.9	22.711	0	3.2518	109210000	4	20.2264	18.2628	19.5358	19.3629	18.1066	19.4697	19.8338	19.2539	Tb927.11.7100:mRNA-p1
		Tb927.9.5210	glutaminyl-tRNA synthetase, putative (28G16.175)	Translation.tRNA	0.690261	1.67313	0	929	8	8	8	16.1	16.1	16.1	67.278	0	12.191	494700000	12	20.5428	16.9336	19.7998	20.86	20.5995	20.836	20.1379	20.78	Tb927.9.5210:mRNA-p1
		Tb927.6.4480	valyl-tRNA synthetase, putative (ValRS)	Translation.tRNA	0.73378	1.39421	0	732	13	13	13	16.8	16.8	16.8	110.92	0	46.59	783020000	23	20.316	18.6093	19.84	19.629	21.3062	22.0127	19.9704	21.615	Tb927.6.4480:mRNA-p1
		Tb927.8.2640	ubiquitin-activating enzyme e1, putative (UBA1)	Ubiquitin.proteasome	0.520082	1.25714	1	827	8	8	8	9.3	9.3	9.3	116.41	0	89.662	478000000	16	20.3001	17.7888	19.5096	20.9296	21.4712	18.9691	19.8893	21.1048	Tb927.8.2640:mRNA-p1
		Tb927.11.7020	proteasome alpha 7 subunit, putative (PSA4)	Ubiquitin.proteasome	0.466653	0.755994	0	475	7	7	7	37.7	37.7	37.7	27.865	0	44.4	334110000	11	20.0342	18.2158	20.0066	19.7647	19.8682	20.8917	19.8479	20.4825	Tb927.11.7020:mRNA-p1
		Tb927.8.1870	Golgi/lysosome glycoprotein 1 (tGLP1)	Vesicular.transport	1.15793	2.85709	0	815	18	18	18	33	33	33	67.597	0	110.91	1788500000	38	19.8744	17.5591	19.1887	19.8612	22.6215	22.7108	19.4804	22.4927	Tb927.8.1870:mRNA-p1
		Tb927.9.13740	ADP-ribosylation factor, putative	Vesicular.transport	0.907686	1.98884	0	900	7	7	7	47.3	47.3	47.3	20.624	0	28.163	988240000	20	20.4239	17.9459	18.5516	19.617	21.3033	21.9676	19.954	21.5773	Tb927.9.13740:mRNA-p1;Tb927.9.13710:mRNA-p1;Tb927.9.13680:mRNA-p1;Tb927.9.13655:mRNA-p1;Tb927.9.13650:mRNA-p1
		Tb927.9.9550	ERBP2	Vesicular.transport	0.466273	1.9541	0	953	9	9	9	49.5	49.5	49.5	24.509	0	98.598	2289000000	26	21.034	18.2323	18.9608	18.2257	22.3281	23.5356	20.5612	23.0847	Tb927.9.9550:mRNA-p1
		Tb927.2.6050	coatamer beta-prime subunit beta prime COP	Vesicular.transport	0.372369	0.889605	0	539	11	11	11	14.9	14.9	14.9	94.485	0	29.912	332560000	13	20.1632	17.6887	19.5719	19.2671	19.4657	21.3598	19.7863	20.8917	Tb927.2.6050:mRNA-p1
		Tb927.11.6170	protein transport protein Sec31, putative,cytosolic coat protein, putative	Vesicular.transport	0.221949	0.320827	0	463	8	8	8	8	8	8	131.1	0	26.265	221470000	12	20.1084	18.8256	19.0284	19.3384	19.1532	20.4333	19.6864	20.0103	Tb927.11.6170:mRNA-p1
		Tb927.7.3180	adaptin complex AP1 mu subunit	Vesicular.transport	0.162186	0.27466	0	766	6	6	6	18.5	18.5	18.5	49.235	0	13.123	330120000	8	20.7666	18.7979	19.8556	19.6959	19.9089	20.6394	20.3439	20.2761	Tb927.7.3180:mRNA-p1
		Tb10.v4.0053	hypothetical protein, 411 kDa mostly peptide repeats	ZUnknown	1.03478	2.88765	1	57	7	7	7	15.1	15.1	15.1	483.8	0	21.404	1204400000	26	20.048	17.6279	20.7539	23.8694	22.4868	20.7366	20.3551	23.4102	Tb10.v4.0053:mRNA-p1;Tb10.v4.0052:mRNA-p1;Tb927.10.10280:mRNA-p1;Tb927.10.10360:mRNA-p1
		Tb927.3.3560	U-box domain containing protein, putative	ZUnknown	0.673166	2.02763	0	569	16	16	16	29	29	29	69.087	0	48.015	1253500000	28	20.7677	17.4999	19.8979	19.5488	21.9904	22.7093	20.3458	22.3083	Tb927.3.3560:mRNA-p1
		Tb927.6.4320	Protein of unknown function (DUF2817), putative	ZUnknown	1.10179	1.58175	0	729	5	5	5	16.3	16.3	16.3	44.423	0	18.49	421920000	7	19.5478	18.0341	19.402	19.9238	20.3109	21.4946	19.3126	21.0558	Tb927.6.4320:mRNA-p1
		Tb927.8.3850	PSP1 C-terminal conserved region, putative	ZUnknown	0.512415	1.37139	1	835	9	9	9	26.7	26.7	26.7	41.994	0	66.173	967610000	17	21.4199	17.8783	20.5614	20.3488	21.7757	21.8493	20.9992	21.6453	Tb927.8.3850:mRNA-p1
		Tb927.10.12820	Cysteine proteinase domains by interpro but not NCBI	ZUnknown	0.573468	1.36631	0	184	8	8	8	9.5	9.5	9.5	110.24	0	31.895	583090000	16	20.6513	17.3989	20.0049	20.0408	20.8034	21.3099	20.2628	20.968	Tb927.10.12820:mRNA-p1
		Tb11.v5.0365	hypothetical protein, conserved	ZUnknown	0.451811	1.28257	#N/A	83	15	15	15	21.4	21.4	21.4	82.854	0	42.875	513510000	23	20.992	18.6196	18.3745	21.4766	21.5323	18.825	20.5178	21.3297	Tb11.v5.0365.1-p1;Tb11.v5.0366.1-p1;Tb927.11.12880:mRNA-p1
		Tb927.7.4700	WD domain, G-beta repeat, putative	ZUnknown	0.587672	1.20503	0	782	7	7	1	15.6	15.6	4.7	77.7	0	76.523	680070000	16	20.5864	18.1998	20.5803	20.1402	21.1491	21.6922	20.4082	21.3338	Tb927.7.4700:mRNA-p1
		Tb927.6.2210	hypothetical protein, conserved, copurifies with ZC3H32 and 4EIP	ZUnknown	0.629664	1.05869	5	710	9	9	9	9	9	9	123.85	0	86.04	342620000	22	20.1395	18.3045	19.0321	20.644	20.8583	19.1498	19.7009	20.5934	Tb927.6.2210:mRNA-p1
		Tb927.1.1500	conserved protein, unknown function	ZUnknown	0.482544	0.955199	0	136	11	11	11	17.9	17.9	17.9	73.618	0	30.855	460520000	20	20.1631	17.8682	19.2105	18.9705	20.3667	20.7702	19.7339	20.4426	Tb927.1.1500:mRNA-p1
		Tb927.11.2540	hypothetical protein, conserved	ZUnknown	0.569666	0.765315	0	420	7	7	7	31.3	31.3	31.3	33.848	0	30.068	207090000	10	19.3201	18.0087	19.1103	19.1916	20.4515	19.0919	19.0646	20.0153	Tb927.11.2540:mRNA-p1
		Tb927.10.14700	hypothetical protein, conserved, no human or yeast homologue	ZUnknown	0.210246	-0.352709	2	215	7	7	7	19.6	19.6	19.6	37.7	0	10.213	787650000	20	20.3444	21.253	21.6894	19.7252	21.1098	21.3937	21.3619	21.1045	Tb927.10.14700:mRNA-p1

## Sheet: 4. DeSeq2
ID	Description	Category	base mean	log2FoldChange	lfcSE	stat	pvalue	padj	Padj<0.01	Padj<0.05		Padj<0.01, log2 fold change >2
Tb927.10.10960	heat shock protein 83, HSP83	Chaperone	15.5	3.858	1.1709	3.295	0.000492	0.00648	1	1		Padj<0.05, log2 fold-change>2
Tb927.10.14890	C-terminal motor kinesin KIFC1	Cytoskeleton	9.833	6.7403	1.8516	3.6402	0.000136	0.00359	1	1
Tb927.9.12630	glycerol kinase, glycosomal (glk1)	Glucose.glycerol	14.167	5.375	1.5756	3.4114	0.000323	0.00511	1	1
Tb927.10.5620	fructose-bisphosphate aldolase, glycosomal (ALD)	Glucose.glycerol	20.833	3.6881	1.1095	3.3241	0.000444	0.00618	1	1
Tb927.3.3270	ATP-dependent phosphofructokinase (TbPFK)	Glucose.glycerol	46.167	2.8863	0.8182	3.5278	0.000209	0.00382	1	1
Tb927.10.14710	40S ribosomal protein S2	Ribosome	12.333	7.0672	1.6824	4.2008	1.33e-05	0.00045	1	1
Tb927.9.9450	ZC3H28	RNA.binding	8.167	6.4724	1.7502	3.6981	0.000109	0.00322	1	1
Tb927.11.14190	Staphylococcal nuclease homologue/Tudor domain containing protein, putative	RNA.binding	35.167	3.1775	0.8892	3.5737	0.000176	0.0037	1	1
Tb927.6.4770	MKT1	RNA.degradation	17.333	7.5581	1.5737	4.8027	7.83e-07	0.000185	1	1
Tb927.3.2600	ATP-dependent DEAD/H RNA helicase, putative, no clear yeast homologue	RNA.helicase	11.667	6.987	1.6623	4.2033	1.32e-05	0.00045	1	1
Tb927.10.1490	MKT1-like	RNA.processing	7	6.25	1.8134	3.4466	0.000284	0.00481	1	1
Tb927.10.4570	EF2 elongation factor 2	Translation	20.667	4.2977	1.1965	3.5917	0.000164	0.0037	1	1
Tb927.9.12510	DED1-2, ATP-dependent DEAD/H RNA helicase, DED1-2	Translation	17	4	1.1866	3.371	0.000374	0.00555	1	1
Tb927.9.10770	PABP2	Translation	97.5	2.5171	0.7076	3.5572	0.000187	0.0037	1	1
Tb927.1.4650	cyclin-like F-box protein (CFB2)	Ubiquitin.proteasome	13	7.1431	1.6165	4.4189	4.96e-06	0.00045	1	1
Tb927.10.6050	clathrin heavy chain (CHC)	Vesicular.transport	27	4.2668	1	4.2666	9.92e-06	0.00045	1	1
Tb927.10.14150	hypothetical protein, conserved, related to yeast BFR1, component pf polysomal mRNP. Weak chromosomal segregation ATPase domain. loc in ER of Sc. Interacts RF1, AP3	Vesicular.transport	39.5	4.2288	0.9795	4.3175	7.89e-06	0.00045	1	1
Tb927.8.1290	hypothetical protein, conserved, no domains, copurifies with ZC3H32	ZUnknown	12.5	7.0865	1.672	4.2383	1.13e-05	0.00045	1	1
Tb927.5.3800	glutamine hydrolysing (not ammonia-dependent) carbomoyl phosphate synthase, putative	Amino.acids	4.167	5.5016	2.1602	2.5468	0.00544	0.0248	0	1
Tb927.11.17000	AIR9	Cell.cycle	13	3.585	1.2593	2.8468	0.00221	0.0157	0	1
Tb927.11.2650	heat shock protein 84, putative, mit HSp90	Chaperone	4.833	5.7157	2.0444	2.7958	0.00259	0.0157	0	1
Tb927.10.12710	heat shock protein, HSP110	Chaperone	6.167	4.1293	1.9122	2.1594	0.0154	0.0446	0	1
Tb927.11.11330	heat shock protein 70, major HSP70	Chaperone	6.833	3.663	1.7597	2.0815	0.0187	0.0487	0	1
Tb927.11.3250	dynein heavy chain	Cytoskeleton	5.5	5.9021	1.9717	2.9935	0.00138	0.0129	0	1
Tb927.10.9570	paraflagellar rod protein PFC14	Cytoskeleton	6.667	5.1813	2.0264	2.5569	0.00528	0.0245	0	1
Tb927.3.930	OADalpha outer arm dynein heavy chain	Cytoskeleton	6.5	5.1438	1.8515	2.7782	0.00273	0.0162	0	1
Tb927.3.4330	73 kDa paraflagellar rod protein. PFR1	Cytoskeleton	5	4.7539	2.0099	2.3652	0.00901	0.0321	0	1
Tb927.11.7560	CMF15, T. brucei components of motile flagella (TbCMF15)	Cytoskeleton	4.833	4.7033	2.1562	2.1813	0.0146	0.0437	0	1
Tb927.10.1170	intraflagellar transport protein IFT172	Cytoskeleton	6	3.4594	1.5971	2.1661	0.0152	0.0446	0	1
Tb927.5.1210	short-chain dehydrogenase, putative	Enzyme	4.833	5.7157	2.0238	2.8242	0.00237	0.0157	0	1
Tb927.2.4210	glycosomal phosphoenolpyruvate carboxykinase (PEPCK)	Glucose.glycerol	4.667	5.6651	2.2646	2.5015	0.00618	0.0262	0	1
Tb927.11.7380	glycerol-3-phosphate dehydrogenase (FAD-dependent), mitochondrial, TAO complex	Glucose.glycerol	4.333	5.5581	2.3129	2.4031	0.00813	0.0317	0	1
Tb927.1.3830	glucose-6-phosphate isomerase, glycosomal (PGI)	Glucose.glycerol	9	4.7004	1.7898	2.6263	0.00432	0.0222	0	1
Tb927.10.2010	hexokinase (HK1)	Glucose.glycerol	8.5	4.6147	1.7747	2.6003	0.00466	0.023	0	1
Tb927.8.3530	glycerol-3-phosphate dehydrogenase [NAD ], glycosomal	Glucose.glycerol	6.667	4.2479	1.8395	2.3093	0.0105	0.0344	0	1
Tb927.6.4300	glyceraldehyde 3-phosphate dehydrogenase, glycosomal (GAPDH)	Glucose.glycerol	28.667	3.0969	1.0989	2.8181	0.00242	0.0157	0	1
Tb927.10.14140	pyruvate kinase 1 (PYK1)	Glucose.glycerol	31.167	2.5055	0.8249	3.0376	0.00119	0.0128	0	1
Tb927.5.890	oligosaccharyl transferase subunit, putative	Glycans	3.667	5.3171	2.1792	2.4399	0.00734	0.03	0	1
Tb927.8.7100	acetyl-CoA carboxylase, putative	Lipids	2.833	4.9452	2.3369	2.1161	0.0172	0.0473	0	1
Tb927.9.4210	fatty acyl CoA synthetase 3 (ACS3)	Lipids	8.833	4.0589	1.4839	2.7352	0.00312	0.0176	0	1
Tb927.11.11690	Vacuolar proton pump subunit B, putative	Lysosome	4.167	5.5016	2.3301	2.361	0.00911	0.0321	0	1
Tb927.3.1590	mitochondrial RNA binding complex 1 subunit (MRB1590)	Mito.RNA	4.5	4.5964	1.9446	2.3636	0.00905	0.0321	0	1
Tb927.4.1800	Mitochondrial LSU ribosomal protein L3	Mito.translation	5.167	5.8119	1.9471	2.9849	0.00142	0.0129	0	1
Tb927.10.2240	NTF2-like domain, in Y14 TAP	Nuclear.transport	9.833	3.143	1.3462	2.3346	0.00978	0.0336	0	1
Tb927.11.3650	adenylosuccinate synthetase, putative	Nucleotides	6.833	5.2178	2.0156	2.5887	0.00482	0.023	0	1
Tb927.3.4790	aminopeptidase, putative,metallo-peptidase, Clan MA(E) Family M1	Protease	3.5	5.25	2.2199	2.365	0.00901	0.0321	0	1
Tb927.11.3570	aminopeptidase, putative,metallo-peptidase, Clan MA(E) Family M1	Protease	3.333	5.1796	2.4663	2.1002	0.0179	0.0476	0	1
Tb927.11.4610	protein kinase A regulatory subunit (PKA-R)	Protein.kinase	4.167	5.5016	2.1781	2.5258	0.00577	0.0258	0	1
Tb927.5.800	CK1.2 casein kinase 1	Protein.kinase	4	5.4427	2.3493	2.3167	0.0103	0.0342	0	1
Tb927.2.100	retrotransposon hot spot protein 1 (RHS1), putative	RHS	4	4.4195	2.0579	2.1475	0.0159	0.0448	0	1
Tb927.9.15170	60S ribosomal protein L5, putative	Ribosome	5.167	5.8119	2.0621	2.8184	0.00241	0.0157	0	1
Tb927.10.3940	40S ribosomal protein S3A	Ribosome	4.167	5.5016	2.1271	2.5864	0.00485	0.023	0	1
Tb927.8.1110	40S ribosomal protein S9	Ribosome	3.333	5.1796	2.2643	2.2875	0.0111	0.036	0	1
Tb927.9.15360	40S ribosomal protein S6	Ribosome	6.5	5.1438	1.8346	2.8038	0.00253	0.0157	0	1
Tb927.11.3600	40S ribosomal protein S4	Ribosome	9	4.7004	1.7094	2.7498	0.00298	0.0172	0	1
Tb927.10.560	40S ribosomal protein S11	Ribosome	4.667	4.6508	1.9301	2.4097	0.00798	0.0317	0	1
Tb927.11.6300	40S ribosomal protein S5	Ribosome	6.333	3.5443	1.5641	2.266	0.0117	0.0361	0	1
Tb927.9.6070	40S ribosomal protein S3	Ribosome	19.333	2.9861	1.0177	2.934	0.00167	0.0137	0	1
Tb927.3.870	hypothetical protein, conserved, match to histone RNA hairpin binding proteins	RNA.binding	5.5	5.9021	1.9902	2.9655	0.00151	0.0133	0	1
Tb927.9.9550	hypothetical protein, conserved, no yeast or human match	RNA.binding	4.333	5.5581	2.139	2.5985	0.00468	0.023	0	1
Tb927.11.3490	hypothetical protein, conserved, no domains, no good BLASTp matches	RNA.binding	4	5.4427	2.1824	2.4939	0.00632	0.0263	0	1
Tb927.6.2550	TRRM2	RNA.binding	3.5	5.25	2.2546	2.3286	0.00994	0.0337	0	1
Tb927.11.14100	DRBD4 (PTB2)	RNA.binding	3.333	5.1796	2.2852	2.2666	0.0117	0.0361	0	1
Tb927.1.1500	conserved protein, unknown function	RNA.binding	3.333	5.1796	2.2804	2.2713	0.0116	0.0361	0	1
Tb927.4.2040	ALBA3	RNA.binding	9.667	3.7549	1.4003	2.6815	0.00367	0.0202	0	1
Tb927.11.14090	DRBD18	RNA.binding	6.667	3.1699	1.497	2.1175	0.0171	0.0473	0	1
Tb927.11.1980	ZC3H41	RNA.binding	34	1.74	0.8269	2.1043	0.0177	0.0476	0	1
Tb927.8.4540	PBP1	RNA.degradation	5.333	5.8577	1.9436	3.0138	0.00129	0.0129	0	1
Tb927.10.10850	AGO1	RNA.degradation	4.167	5.5016	2.0919	2.63	0.00427	0.0222	0	1
Tb927.10.3990	DHH1	RNA.degradation	11.167	4.415	1.5031	2.9373	0.00166	0.0137	0	1
Tb927.10.1510	NOT1	RNA.degradation	11	3.3219	1.5388	2.1587	0.0154	0.0446	0	1
Tb927.11.14020	RNA-binding protein (NRBD2)	rRNA.tRNA.process	5.667	4.9403	2.0868	2.3674	0.00896	0.0321	0	1
Tb927.11.4900	guanine nucleotide-binding beta subunit-like protein,WD40/YVTN repeat-like-containing protein	Signalling	5.833	5.987	1.9666	3.0443	0.00117	0.0128	0	1
Tb927.7.6090	eIF3a	Translation	5.333	5.8577	1.9574	2.9926	0.00138	0.0129	0	1
Tb927.11.6160	ERF3 eukaryotic release factor 3, putative	Translation	4.833	5.7157	2.0214	2.8275	0.00235	0.0157	0	1
Tb927.8.4500	eIF4G5	Translation	4.167	5.5016	2.0938	2.6275	0.0043	0.0222	0	1
Tb927.11.14590	G5-IP eIF4G5 interacting protein	Translation	4.167	5.5016	2.3339	2.3572	0.00921	0.0321	0	1
Tb927.9.4680	eIF4A1	Translation	8.667	4.6438	1.6016	2.8995	0.00187	0.0148	0	1
Tb927.5.2570	EIF3B translation initiation factor	Translation	5.5	3.9542	1.8412	2.1477	0.0159	0.0448	0	1
Tb927.11.13190	EF1 gamma, elongation factor 1 gamma, putative	Translation	7.833	3.4263	1.4269	2.4012	0.00817	0.0317	0	1
Tb927.10.2110	EF1-alpha elongation factor 1-alpha, (TEF1)	Translation	23.833	2.6206	0.9348	2.8035	0.00253	0.0157	0	1
Tb927.6.4480	valyl-tRNA synthetase, putative (ValRS)	Translation.tRNA	3.833	5.3813	2.3749	2.2659	0.0117	0.0361	0	1
Tb927.3.4070	pyruvate transporter PT1	Transporter	6.5	4.2094	1.7572	2.3956	0.0083	0.0317	0	1
Tb927.9.12650	ubiquitin-activating enzyme e1, putative (UBA2)	Ubiquitin.proteasome	5.5	5.9021	1.9259	3.0646	0.00109	0.0128	0	1
Tb927.8.1870	Golgi/lysosome glycoprotein 1 (tGLP1)	Vesicular.transport	6.333	6.1056	1.9402	3.1469	0.000825	0.0103	0	1
Tb927.9.13740	ADP-ribosylation factor, putative	Vesicular.transport	3.333	5.1796	2.4663	2.1002	0.0179	0.0476	0	1
Tb927.4.2070	Myosin-like protein, possibly ER-Golgi vesicular transport	Vesicular.transport	10.667	4.3458	1.5073	2.8832	0.00197	0.015	0	1
Tb927.3.3560	U-box domain containing protein, putative	ZUnknown	4.667	5.6651	2.2618	2.5047	0.00613	0.0262	0	1
Tb11.v5.0365	hypothetical protein, conserved	ZUnknown	3.833	5.3813	2.1486	2.5046	0.00613	0.0262	0	1
Tb10.v4.0053	hypothetical protein	ZUnknown	4.333	4.5398	2.0154	2.2526	0.0121	0.0369	0	1
Tb927.4.1300	amidinotransferase, putative	ZUnknown	8.833	2.7162	1.2998	2.0896	0.0183	0.0483	0	1
Tb927.8.7980	vacuolar-type H( )-translocating pyrophosphatase (TVP1)	Acidocalcisome	1.167	3.665	3.4895	1.0503	0.147	NA	0	0
Tb927.9.3280	acidocalcisomal exopolyphosphatase	Acidocalcisome	0.333	1.8577	4.0377	0.4601	0.323	NA	0	0
Tb927.11.12220	catalytic subunit of the vacuolar transporter chaperone 4, polyphosphate polymerase, Vtc4	Acidocalcisome	0.167	0.9618	4.0805	0.2357	0.407	NA	0	0
Tb927.4.4860	amino acid transporter 8, putative (AATP8)	Amino.acid.transport	0.833	3.1796	3.9597	0.803	0.211	NA	0	0
Tb927.8.8260	amino acid transporter, putative	Amino.acid.transport	0.167	0.9618	4.0805	0.2357	0.407	NA	0	0
Tb927.11.9590	S-adenosylhomocysteine hydrolase, putative	Amino.acids	7	6.2499	3.8945	1.6048	0.0543	0.0964	0	0
Tb927.7.7040	methylthioadenosine phosphorylase, putative (MTAP)	Amino.acids	1.333	3.8577	3.3236	1.1607	0.123	NA	0	0
Tb927.11.1560	1,2-Dihydroxy-3-keto-5-methylthiopentene dioxygenase, putative	Amino.acids	0.667	2.8577	3.9728	0.7193	0.236	NA	0	0
Tb927.8.6060	2-amino-3-ketobutyrate coenzyme A ligase, putative	Amino.acids	0.667	2.8577	3.9728	0.7193	0.236	NA	0	0
Tb927.7.1110	asparagine synthetase a, putative	Amino.acids	0.333	1.8577	4.0377	0.4601	0.323	NA	0	0
Tb927.9.2010	kynureninase, putative	Amino.acids	0.333	1.8577	4.0377	0.4601	0.323	NA	0	0
Tb927.4.360	1,2-Dihydroxy-3-keto-5-methylthiopentene dioxygenase, putative	Amino.acids	0.167	0.9618	4.0805	0.2357	0.407	NA	0	0
Tb927.10.3660	aspartate aminotransferase	Amino.acids	0.167	0.9618	4.0805	0.2357	0.407	NA	0	0
Tb927.7.1910	pyridoxal phosphate containing glycine decarboxylase, putative	Amino.acids	0.167	0.9618	4.0805	0.2357	0.407	NA	0	0
Tb927.10.3560	arginine N-methyltransferase, PRMT1 prozyme	Arg.methylation	0.333	1.8577	4.0377	0.4601	0.323	NA	0	0
Tb927.10.2880	calcium channel protein, putative	Calcium	0.5	2.4426	3.9946	0.6115	0.27	NA	0	0
Tb927.8.4810	prohibitin 1 (PHB1)	Cell.cycle	0.5	2.4426	3.9946	0.6115	0.27	NA	0	0
Tb927.9.10920	KKT3 kinetochore protein, PK6 protein kinase,	Cell.cycle	0.333	1.8577	4.0377	0.4601	0.323	NA	0	0
Tb927.10.1070	CRK1 cdc2- like protein kinase	Cell.cycle	0.167	0.9618	4.0805	0.2357	0.407	NA	0	0
Tb927.11.10520	KKT2 kinetochore protein, tyrosine kinase, putative	Cell.cycle	0.167	0.9618	4.0805	0.2357	0.407	NA	0	0
Tb927.10.4310	prohibitin 2 (PHB2)	Cell.cycle	0.167	0.9618	4.0805	0.2357	0.407	NA	0	0
Tb927.11.16760	Tric complex alpha subunit (TCP-1-alpha)	Chaperone	6.833	6.2152	3.8866	1.5991	0.0549	0.0964	0	0
Tb927.11.3240	Tric complex zeta subunit (TCP-1-zeta)	Chaperone	5.5	5.902	3.8244	1.5433	0.0614	0.101	0	0
Tb927.10.1060	Tric complex delta subunit (TCP-1-delta)	Chaperone	3	5.0276	2.5774	1.9506	0.0255	0.0612	0	0
Tb927.10.8230	protein disulfide isomerase,ERp57-like, cofactor wth calnexin, putative	Chaperone	2	4.4426	2.8813	1.5419	0.0616	0.101	0	0
Tb927.9.11270	Tric complex eta subunit (TCP-1-eta)	Chaperone	1.5	4.0276	3.1879	1.2634	0.103	0.125	0	0
Tb927.10.8190	Tric complex theta subunit (TCP-1-theta)	Chaperone	1.333	3.8577	3.7036	1.0416	0.149	NA	0	0
Tb927.9.4500	HSP70, endoplasmatic reticulum, HSP70.a	Chaperone	1.167	3.665	3.5305	1.0381	0.15	NA	0	0
Tb927.9.9860	GRP170, HSP70 and actin-like ATPase domains	Chaperone	1	3.4426	3.7001	0.9304	0.176	NA	0	0
Tb927.11.880	cyclophilin a,cyclophilin type peptidyl-prolyl cis-trans isomerase (CYPA)	Chaperone	1.667	3.0658	2.8771	1.0656	0.143	0.165	0	0
Tb927.9.3440	cyclophilin type peptidyl-prolyl cis-trans isomerase, putative (PPIase)	Chaperone	0.667	2.8577	3.9728	0.7193	0.236	NA	0	0
Tb927.7.710	heat shock 70 kDa protein, putative (HSP70.4)	Chaperone	0.667	2.8577	3.9728	0.7193	0.236	NA	0	0
Tb927.5.2940	stress-induced protein sti1, putative	Chaperone	0.667	2.8577	3.9728	0.7193	0.236	NA	0	0
Tb927.9.10230	HSP20 domain (p23-like)	Chaperone	0.5	2.4426	3.9946	0.6115	0.27	NA	0	0
Tb927.1.3200	SGT1-like protein, putative	Chaperone	1.667	2	2.8475	0.7024	0.241	0.263	0	0
Tb927.10.16100	FK506-binding protein (FKBP)-type peptidyl-prolyl isomerase	Chaperone	0.333	1.8577	4.0377	0.4601	0.323	NA	0	0
Tb927.10.14380	Hsp70 protein, putative	Chaperone	0.333	1.8577	4.0377	0.4601	0.323	NA	0	0
Tb927.7.5790	protein disulfide isomerase, ERp44-like	Chaperone	0.333	1.8577	4.0377	0.4601	0.323	NA	0	0
Tb927.11.5220	chaperone protein DNAj, putative	Chaperone	0.167	0.9618	4.0805	0.2357	0.407	NA	0	0
Tb927.6.2170	co-chaperone GrpE, putative	Chaperone	0.167	0.9618	4.0805	0.2357	0.407	NA	0	0
Tb927.9.10100	Possible histone methyltransferase: 7 SET domains.	Chromatin	1.5	4.0276	3.1827	1.2655	0.103	0.125	0	0
Tb927.10.10590	histone H2B	Chromatin	3	3.9834	2.4118	1.6516	0.0493	0.0962	0	0
Tb927.7.2940	histone H2A	Chromatin	0.333	1.8577	4.0377	0.4601	0.323	NA	0	0
Tb927.10.7510	chromatin binding protein, putative	Chromatin	0.167	0.9618	4.0805	0.2357	0.407	NA	0	0
Tb927.9.5900	glutamate dehydrogenase (GDH)	Citric.acid.cycle	1	3.4426	3.707	0.9287	0.177	NA	0	0
Tb927.11.16730	dihydrolipoyl dehydrogenase (GCVL-2)	Citric.acid.cycle	0.167	0.9618	4.0805	0.2357	0.407	NA	0	0
Tb927.1.4310	FAZ2 flagellar attachment zone protein	Cytoskeleton	3.5	5.25	2.5417	2.0656	0.0194	0.0501	0	0
Tb927.4.560	Cytoplasmic dynein 2 heavy chain (DYNC2H1), putative	Cytoskeleton	2.333	4.665	2.7653	1.687	0.0458	0.0912	0	0
Tb927.11.1740	intraflagellar transport protein IFT88	Cytoskeleton	1.833	4.3171	2.9712	1.453	0.0731	0.108	0	0
Tb927.10.14990	intraflagellar transport protein IFT80/CHE2	Cytoskeleton	1.833	4.3171	2.9672	1.455	0.0728	0.108	0	0
Tb927.5.3030	intraflagellar transport protein IFT122B	Cytoskeleton	1.667	4.1796	2.8303	1.4767	0.0699	0.108	0	0
Tb927.11.5000	dynein intermediate chain IC78, putative	Cytoskeleton	1.667	4.1796	3.0649	1.3637	0.0863	0.117	0	0
Tb927.8.3100	coronin (CRN12)	Cytoskeleton	1.333	3.8577	3.3198	1.162	0.123	NA	0	0
Tb927.11.2430	dynein heavy chain DHC1b or DYNC2H2, cytoplasmic type	Cytoskeleton	1.333	3.8577	3.7036	1.0416	0.149	NA	0	0
Tb927.10.14470	intraflagellar transport protein IFT140	Cytoskeleton	1.333	3.8577	3.3198	1.162	0.123	NA	0	0
Tb927.8.2630	Kinesin KIN-C. Trypanosome-specific kinesin family 2	Cytoskeleton	1.333	3.8577	3.3369	1.1561	0.124	NA	0	0
Tb927.11.1090	ClpGM6	Cytoskeleton	1.167	3.665	3.1826	1.1516	0.125	NA	0	0
Tb927.6.4140	paraflagellar rod protein PFC4	Cytoskeleton	1.167	3.665	3.1826	1.1516	0.125	NA	0	0
Tb927.8.5460	flagellar calcium-binding protein,44 kDa calflagin, (Tb-44)	Cytoskeleton	1	3.4426	3.707	0.9287	0.177	NA	0	0
Tb927.3.5490	flagellar transport protein, putative (PIFTB2)	Cytoskeleton	1	3.4426	3.7001	0.9304	0.176	NA	0	0
Tb927.3.3000	flagellar transport protein, putative (PIFTC3)	Cytoskeleton	1	3.4426	3.707	0.9287	0.177	NA	0	0
Tb927.9.9870	MCAK-like kinesin, putative	Cytoskeleton	1	3.4426	3.707	0.9287	0.177	NA	0	0
Tb927.11.2270	dynein intermediate chain IC140 (IDA7)	Cytoskeleton	0.833	3.1796	3.9597	0.803	0.211	NA	0	0
Tb927.8.4780	FLAM3	Cytoskeleton	0.833	3.1796	3.9597	0.803	0.211	NA	0	0
Tb927.8.3250	IAD-1beta inner arm dynein heavy chain	Cytoskeleton	0.833	3.1796	3.9597	0.803	0.211	NA	0	0
Tb927.7.920	IAD-5 inner arm dynein heavy chain, clathrin-associated	Cytoskeleton	0.833	3.1796	3.9597	0.803	0.211	NA	0	0
Tb927.10.5380	intraflagellar transport protein IFT122	Cytoskeleton	0.833	3.1796	3.9597	0.803	0.211	NA	0	0
Tb927.6.3670	paraflagellar rod protein PFC8	Cytoskeleton	0.833	3.1796	3.9597	0.803	0.211	NA	0	0
Tb927.11.13230	TbVAP, flagellar attachment zone	Cytoskeleton	0.833	3.1796	3.9597	0.803	0.211	NA	0	0
Tb927.9.8880	actin A	Cytoskeleton	0.667	2.8577	3.9728	0.7193	0.236	NA	0	0
Tb927.10.16110	CMF1, possible component of motile flagella	Cytoskeleton	0.667	2.8577	3.9728	0.7193	0.236	NA	0	0
Tb927.5.2950	CMF3, T. brucei components of motile flagella (TbCMF3)	Cytoskeleton	0.667	2.8577	3.9728	0.7193	0.236	NA	0	0
Tb927.11.11220	dynein heavy chain	Cytoskeleton	0.667	2.8577	3.9728	0.7193	0.236	NA	0	0
Tb927.7.3330	FAZ10 flagellar attachment zone protein	Cytoskeleton	0.667	2.8577	3.9728	0.7193	0.236	NA	0	0
Tb927.10.840	FAZ6 flagellar attachment zone protein	Cytoskeleton	0.667	2.8577	3.9728	0.7193	0.236	NA	0	0
Tb927.6.3150	Hydin,flagellar component	Cytoskeleton	0.667	2.8577	3.9728	0.7193	0.236	NA	0	0
Tb927.10.10140	paraflagellar rod protein PFC19	Cytoskeleton	0.667	2.8577	3.9728	0.7193	0.236	NA	0	0
Tb927.10.650	TAX-2, flagellar protein	Cytoskeleton	0.667	2.8577	3.9728	0.7193	0.236	NA	0	0
Tb927.1.2390	beta tubulin	Cytoskeleton	10	2.5025	1.3036	1.9196	0.0275	0.0638	0	0
Tb927.11.1430	CMF2, T. brucei components of motile flagella (TbCMF2)	Cytoskeleton	0.5	2.4426	3.9946	0.6115	0.27	NA	0	0
Tb927.11.715	dynein light chain LC8, putative	Cytoskeleton	0.5	2.4426	3.9946	0.6115	0.27	NA	0	0
Tb927.3.5540	FAP133, Component of the IFT dynein motor	Cytoskeleton	0.5	2.4426	3.9946	0.6115	0.27	NA	0	0
Tb927.11.12530	FAZ3 flagellar attachment zone protein	Cytoskeleton	0.5	2.4426	3.9946	0.6115	0.27	NA	0	0
Tb927.9.13440	Flagellar Member 5 (FLAM5)	Cytoskeleton	0.5	2.4426	3.9946	0.6115	0.27	NA	0	0
Tb927.3.5020	Flagellar Member 6 (FLAM6)	Cytoskeleton	0.5	2.4426	3.9946	0.6115	0.27	NA	0	0
Tb927.10.8940	Flagellum tageting protein KHARON1	Cytoskeleton	0.5	2.4426	3.9946	0.6115	0.27	NA	0	0
Tb927.11.2610	hypothetical protein, conserved, no domains, no yeast or human match	Cytoskeleton	0.5	2.4426	3.9946	0.6115	0.27	NA	0	0
Tb927.9.7720	Member of IFT complex A, tetratricopeptide repeat protein	Cytoskeleton	0.5	2.4426	3.9946	0.6115	0.27	NA	0	0
Tb927.11.13500	paraflagellar rod protein par1	Cytoskeleton	0.5	2.4426	3.9946	0.6115	0.27	NA	0	0
Tb927.11.260	PIFTF6 ,predicted WD40 repeat	Cytoskeleton	0.5	2.4426	3.9946	0.6115	0.27	NA	0	0
Tb927.10.14010	RP2 basal body protein, required for axoneme formation	Cytoskeleton	0.5	2.4426	3.9946	0.6115	0.27	NA	0	0
Tb927.1.2400	alpha tubulin	Cytoskeleton	13.333	2.237	1.1244	1.9895	0.0233	0.0564	0	0
Tb927.8.4210	BBP46	Cytoskeleton	0.333	1.8577	4.0377	0.4601	0.323	NA	0	0
Tb927.8.4870	DIGIT, flagellar component	Cytoskeleton	0.333	1.8577	4.0377	0.4601	0.323	NA	0	0
Tb927.11.8160	dynein heavy chain	Cytoskeleton	0.333	1.8577	4.0377	0.4601	0.323	NA	0	0
Tb927.4.870	dynein heavy chain DNAH10 IAD-1alpha inner arm dynein heavy chain	Cytoskeleton	0.333	1.8577	4.0377	0.4601	0.323	NA	0	0
Tb11.v5.0242	dynein heavy chain, putative	Cytoskeleton	0.333	1.8577	4.0377	0.4601	0.323	NA	0	0
Tb927.1.2670	flagellar protein PF16	Cytoskeleton	0.333	1.8577	4.0377	0.4601	0.323	NA	0	0
Tb927.2.5270	IAD-3 inner arm dynein heavy chain	Cytoskeleton	0.333	1.8577	4.0377	0.4601	0.323	NA	0	0
Tb927.11.2490	Kinesin-3	Cytoskeleton	0.333	1.8577	4.0377	0.4601	0.323	NA	0	0
Tb927.7.5650	Kinesin-4/10	Cytoskeleton	0.333	1.8577	4.0377	0.4601	0.323	NA	0	0
Tb927.8.6660	paraflagellar rod protein PFC1	Cytoskeleton	0.333	1.8577	4.0377	0.4601	0.323	NA	0	0
Tb927.10.8930	paraflagellar rod protein PFC18	Cytoskeleton	0.333	1.8577	4.0377	0.4601	0.323	NA	0	0
Tb927.7.1920	paraflagellar rod protein PFC5	Cytoskeleton	0.333	1.8577	4.0377	0.4601	0.323	NA	0	0
Tb927.11.13780	profilin	Cytoskeleton	0.333	1.8577	4.0377	0.4601	0.323	NA	0	0
Tb927.11.4480	radial spoke protein RSP4/6, putative	Cytoskeleton	0.333	1.8577	4.0377	0.4601	0.323	NA	0	0
Tb927.11.2440	TBCCD1, bilobe, centrioles, cell body anterior	Cytoskeleton	0.333	1.8577	4.0377	0.4601	0.323	NA	0	0
Tb927.7.6290	kinesin, putative (TbKIF9A)	Cytoskeleton	1.333	1.5849	3.1102	0.5096	0.305	NA	0	0
Tb927.4.2080	CC2D is a FAZ-ER protein, also present on the basal bodies. CC2D is required for FAZ filament assembly.	Cytoskeleton	0.167	0.9618	4.0805	0.2357	0.407	NA	0	0
Tb927.10.7690	CMF4, T. brucei components of motile flagella (TbCMF4)	Cytoskeleton	0.167	0.9618	4.0805	0.2357	0.407	NA	0	0
Tb927.2.4810	CMF5, T. brucei components of motile flagella (TbCMF5)	Cytoskeleton	0.167	0.9618	4.0805	0.2357	0.407	NA	0	0
Tb927.11.7740	dynein light chain, putative,dynein Tctex2 family, putative	Cytoskeleton	0.167	0.9618	4.0805	0.2357	0.407	NA	0	0
Tb927.3.3690	flagellar radial spoke protein-like, putative	Cytoskeleton	0.167	0.9618	4.0805	0.2357	0.407	NA	0	0
Tb927.10.14980	intraflagellar transport protein IFT52	Cytoskeleton	0.167	0.9618	4.0805	0.2357	0.407	NA	0	0
Tb927.5.2410	kinesin	Cytoskeleton	0.167	0.9618	4.0805	0.2357	0.407	NA	0	0
Tb927.8.7450	myosin heavy chain kinase A, putative	Cytoskeleton	0.167	0.9618	4.0805	0.2357	0.407	NA	0	0
Tb927.7.4290	Nuclear migration protein NudC (animals), 46% identity	Cytoskeleton	0.167	0.9618	4.0805	0.2357	0.407	NA	0	0
Tb927.9.10370	TAX-1, flagellar protein	Cytoskeleton	0.167	0.9618	4.0805	0.2357	0.407	NA	0	0
Tb927.9.13610	helicase, putative	DNA	1.667	4.1796	2.8668	1.4579	0.0724	0.108	0	0
Tb927.4.1270	ruvB-like DNA helicase, putative	DNA	1.5	4.0276	3.1827	1.2655	0.103	0.125	0	0
Tb927.11.11550	DNA topoisomerase II, putative	DNA	0.167	0.9618	4.0805	0.2357	0.407	NA	0	0
Tb927.9.4390	DNA-damage inducible protein DDI1-like protein (1L12.395)	DNA	0.167	0.9618	4.0805	0.2357	0.407	NA	0	0
Tb927.11.9130	replication factor A, 51kDa subunit, putative	DNA	0.167	0.9618	4.0805	0.2357	0.407	NA	0	0
Tb927.5.1460	Mo/Co carrier or lysine decarboxylase	Enzyme	2.167	4.5581	2.8101	1.622	0.0524	0.0962	0	0
Tb927.10.7230	hypothetical protein, conserved, 7 nucleoside diphostate kinase domains	Enzyme	1.5	4.0276	3.2029	1.2575	0.104	0.125	0	0
Tb927.11.8380	NADPH--cytochrome p450 reductase, putative (CPR)	Enzyme	0.667	2.8577	3.9728	0.7193	0.236	NA	0	0
Tb11.v5.0641	major vault protein, putative	Enzyme	0.667	2.8577	3.9728	0.7193	0.236	NA	0	0
Tb927.11.13360	AAA ATPase, putative	Enzyme	0.5	2.4426	3.9946	0.6115	0.27	NA	0	0
Tb11.v5.0820	branched-chain amino acid aminotransferase, putative	Enzyme	0.5	2.4426	3.9946	0.6115	0.27	NA	0	0
Tb927.4.4650	diphthine synthase, putative	Enzyme	0.333	1.8577	4.0377	0.4601	0.323	NA	0	0
Tb927.7.5210	hypothetical protein, conserved, phosphatase domain and DUF	Enzyme	0.333	1.8577	4.0377	0.4601	0.323	NA	0	0
Tb927.11.8440	haloacid dehalogenase-like hydrolase, putative	Enzyme	0.333	1.8577	4.0377	0.4601	0.323	NA	0	0
Tb927.10.5670	N-acetyltransferase subunit Nat1, putative (NAT1)	Enzyme	0.167	0.9618	4.0805	0.2357	0.407	NA	0	0
Tb927.10.3150	N-acetyltransferase, putative	Enzyme	0.167	0.9618	4.0805	0.2357	0.407	NA	0	0
Tb927.7.1930	nucleoside diphosphatase, putative,ectonucleoside triphosphate diphosphohydrolase 5, putative	Enzyme	0.167	0.9618	4.0805	0.2357	0.407	NA	0	0
Tb927.6.1850	quiescin sulfhydryl oxidase (QSOX)	Enzyme	0.167	0.9618	4.0805	0.2357	0.407	NA	0	0
Tb927.6.4920	S-adenosylmethionine synthetase, putative (METK1)	Enzyme	0.167	0.9618	4.0805	0.2357	0.407	NA	0	0
Tb927.11.10020	short-chain dehydrogenase, putative	Enzyme	0.167	0.9618	4.0805	0.2357	0.407	NA	0	0
Tb11.v5.0826	expression site-associated gene (ESAG) protein, putative	ESAG	0.833	3.1796	3.9597	0.803	0.211	NA	0	0
Tb11.v5.0865	receptor-type adenylate cyclase GRESAG 4, putative	ESAG	0.167	0.9618	4.0805	0.2357	0.407	NA	0	0
Tb10.v4.0101	ESAG pseudogene	ESAG.pseudo	1	3.4426	3.7001	0.9304	0.176	NA	0	0
Tb09.v4.0154	ESAG3 pseudogene	ESAG.pseudo	0.5	2.4426	3.9946	0.6115	0.27	NA	0	0
Tb927.6.5490	ESAG3 pseudogene	ESAG.pseudo	0.167	0.9618	4.0805	0.2357	0.407	NA	0	0
Tb927.8.2210	pteridine reductase (PTR1)	Folate	0.167	-0.9618	4.0805	0	0.593	NA	0	0
Tb927.9.8720	fructose-1,6-bisphosphatase (FBPase)	Glucose.glycerol	1.833	4.3171	2.9672	1.455	0.0728	0.108	0	0
Tb927.10.2890	enolase	Glucose.glycerol	1.667	4.1796	3.0672	1.3627	0.0865	0.117	0	0
Tb927.9.9820	glyceraldehyde-3-phosphate dehydrogenase, putative	Glucose.glycerol	1.667	4.1796	3.0672	1.3627	0.0865	0.117	0	0
Tb927.8.2520	Acetyl-CoA synthetase	Glucose.glycerol	1.333	3.8577	3.3694	1.1449	0.126	NA	0	0
Tb927.10.6880	glyceraldehyde 3-phosphate dehydrogenase, cytosolic (GAP)	Glucose.glycerol	2.667	3.8028	2.317	1.6412	0.0504	0.0962	0	0
Tb927.10.7090	alternative oxidase (AOX or TAO complex)	Glucose.glycerol	1.167	3.665	3.5305	1.0381	0.15	NA	0	0
Tb927.11.5520	triosephosphate isomerase (TIM)	Glucose.glycerol	3.5	3.2479	2.2731	1.4288	0.0765	0.109	0	0
Tb927.1.710	phosphoglycerate kinase (PGKB)	Glucose.glycerol	0.5	2.4426	3.9946	0.6115	0.27	NA	0	0
Tb927.10.8480	glucose transporter, putative	Glucose.glycerol	0.333	1.8577	4.0377	0.4601	0.323	NA	0	0
Tb927.10.2490	glucose-6-phosphate 1-dehydrogenase (G6PD)	Glucose.glycerol	0.333	1.8577	4.0377	0.4601	0.323	NA	0	0
Tb927.2.5800	sedoheptulose-1,7-bisphosphatase (SBPase)	Glucose.glycerol	0.333	1.8577	4.0377	0.4601	0.323	NA	0	0
Tb927.10.2020	hexokinase (HK2)	Glucose.glycerol	0.167	0.9618	4.0805	0.2357	0.407	NA	0	0
Tb927.11.2380	phosphoglycerate kinase, putative	Glucose.glycerol	0.167	0.9618	4.0805	0.2357	0.407	NA	0	0
Tb927.10.13630	ER glucosidase II	Glycans	1.667	4.1796	3.0757	1.3589	0.0871	0.117	0	0
Tb927.5.900	oligosaccharyl transferase subunit, putative	Glycans	1.5	4.0276	3.2029	1.2575	0.104	0.125	0	0
Tb927.3.4630	UDP-glucose:glycoprotein glucosyltransferase, ER quality control	Glycans	0.667	2.8577	3.9728	0.7193	0.236	NA	0	0
Tb927.11.2520	UDP-N-acetylglucosamine pyrophosphorylase, putative	Glycans	0.667	2.8577	3.9728	0.7193	0.236	NA	0	0
Tb927.9.3400	endo-beta-N-acetylglucosaminidase, putative	Glycans	0.5	2.4426	3.9946	0.6115	0.27	NA	0	0
Tb927.3.5660	GnT11 UDP-GlcNAc:α3-D-mannoside β1–2-N-acetylglucosaminyltransferase I	Glycans	0.333	1.8577	4.0377	0.4601	0.323	NA	0	0
Tb927.10.4610	dolicholphosphate-mannose synthase, putative	Glycans	0.167	0.9618	4.0805	0.2357	0.407	NA	0	0
Tb927.6.1140	dolichyl-P-Man:GDP-Man5GlcNAc2-PP-dolichyl alpha-1,2-mannosyltransferase, putative	Glycans	0.167	0.9618	4.0805	0.2357	0.407	NA	0	0
Tb927.10.13780	GSK3-short glycogen synthase kinase 3	Glycans	0.167	0.9618	4.0805	0.2357	0.407	NA	0	0
Tb927.3.3580	lipophosphoglycan biosynthetic protein, putative (LPG3)=GRP94 ER chaperone	Glycans	0.167	0.9618	4.0805	0.2357	0.407	NA	0	0
Tb927.4.4250	UDP-Gal or UDP-GlcNAc-dependent glycosyltransferase, putative	Glycans	0.5	0.8959	4.0377	0.2219	0.412	NA	0	0
Tb927.11.11520	PEX11 glycosomal membrane protein	Glycosome	1.333	3.8577	3.3236	1.1607	0.123	NA	0	0
Tb927.9.11600	Gim5B protein,glycosomal membrane protein (gim5B)	Glycosome	0.5	2.4426	3.9946	0.6115	0.27	NA	0	0
Tb927.3.3610	PEX7 peroxisomal targeting signal type 2 receptor	Glycosome	0.333	1.8577	4.0377	0.4601	0.323	NA	0	0
Tb927.11.1070	glycosomal transporter (GAT3)	Glycosome	0.167	0.9618	4.0805	0.2357	0.407	NA	0	0
Tb927.10.13860	GPI-anchor transamidase subunit 8 (GPI8)	GPI.anchors	0.833	3.1796	3.9597	0.803	0.211	NA	0	0
Tb927.4.1920	GPI transamidase, putative (TbGPI16)	GPI.anchors	0.667	2.8577	3.9728	0.7193	0.236	NA	0	0
Tb927.2.6000	GPI phospholipase C	GPI.anchors	0.167	0.9618	4.0805	0.2357	0.407	NA	0	0
Tb927.10.210	GPI transamidase component GAA1	GPI.anchors	0.167	0.9618	4.0805	0.2357	0.407	NA	0	0
Tb927.5.3400	calcium-translocating P-type ATPase, calcium pump	Ions	2	4.4426	2.8884	1.5381	0.062	0.101	0	0
Tb927.2.2520	Mitochondrial outer membrane protein porin 2	Ions	1.5	4.0276	3.1879	1.2634	0.103	0.125	0	0
Tb927.8.650	cation-transporting ATPase, putative	Ions	0.667	2.8577	3.9728	0.7193	0.236	NA	0	0
Tb927.10.14160	Aquaglyceroporin 3	Ions	0.5	2.4426	3.9946	0.6115	0.27	NA	0	0
Tb927.10.12500	P-type H -ATPase, putative	Ions	0.5	2.4426	3.9946	0.6115	0.27	NA	0	0
Tb927.9.15460	calcium motive p-type ATPase, putative	Ions	0.333	1.8577	4.0377	0.4601	0.323	NA	0	0
Tb927.4.1610	VDAC-like	Ions	0.333	1.8577	4.0377	0.4601	0.323	NA	0	0
Tb927.9.4190	fatty acyl CoA syntetase 1 (ACS1)	Lipids	1.833	4.3171	2.7192	1.5877	0.0562	0.0965	0	0
Tb927.10.3260	Long-chain-fatty-acid--CoA ligase 5, Acyl-CoA synthetase 5 (LACS 5)	Lipids	1.667	4.1796	3.0649	1.3637	0.0863	0.117	0	0
Tb927.8.2540	3-ketoacyl-CoA thiolase, putative	Lipids	1	3.4426	3.707	0.9287	0.177	NA	0	0
Tb927.11.6390	hypothetical protein, conserved, START domain, possible phoshatidylcholine transfer protein	Lipids	0.833	3.1796	3.9597	0.803	0.211	NA	0	0
Tb927.7.4180	Elongase 3	Lipids	0.667	2.8577	3.9728	0.7193	0.236	NA	0	0
Tb927.1.4490	acetyltransferase, putative	Lipids	0.5	2.4426	3.9946	0.6115	0.27	NA	0	0
Tb927.2.3080	fatty acid desaturase, putative,oleate desaturase, putative	Lipids	0.5	2.4426	3.9946	0.6115	0.27	NA	0	0
Tb927.1.4830	Phospholipase A1	Lipids	0.5	2.4426	3.9946	0.6115	0.27	NA	0	0
Tb927.6.1500	1-Alkyl-dihydroxyacetonephosphate synthase	Lipids	0.333	1.8577	4.0377	0.4601	0.323	NA	0	0
Tb927.8.6390	lysophospholipase, putative,alpha/beta hydrolase, putative (TbLysoPLA)	Lipids	0.333	1.8577	4.0377	0.4601	0.323	NA	0	0
Tb927.3.4820	acyltransferase, putative	Lipids	0.167	0.9618	4.0805	0.2357	0.407	NA	0	0
Tb927.10.8900	choline/ethanolamine phosphotransferase (CEPT)	Lipids	0.167	0.9618	4.0805	0.2357	0.407	NA	0	0
Tb927.10.12810	cholinephosphate cytidylyltransferase A, putative	Lipids	0.167	0.9618	4.0805	0.2357	0.407	NA	0	0
Tb927.2.4130	enoyl-CoA hydratase/Enoyl-CoA isomerase/3-hydroxyacyl-CoA dehydrogenase, putative	Lipids	0.167	0.9618	4.0805	0.2357	0.407	NA	0	0
Tb927.11.16480	enoyl-CoA hydratase/isomerase family protein, putative	Lipids	0.167	0.9618	4.0805	0.2357	0.407	NA	0	0
Tb927.4.4740	ER to golgi transport of GPI proteins OR Dihydroceramide synthase)	Lipids	0.167	0.9618	4.0805	0.2357	0.407	NA	0	0
Tb927.9.12700	phospholipase A1, putative	Lipids	0.167	0.9618	4.0805	0.2357	0.407	NA	0	0
Tb927.11.2090	choline kinase (EK1)	Lipids	0.333	0	4.0805	0	0.5	NA	0	0
Tb927.11.8950	leucine rich repeat (TbLRRP1), in bilobe	LRRP	0.167	0.9618	4.0805	0.2357	0.407	NA	0	0
Tb927.11.16880	leucine-rich repeat protein (LRRP)	LRRP	0.167	0.9618	4.0805	0.2357	0.407	NA	0	0
Tb927.5.1300	vacuolar proton translocating ATPase subunit A, putative	Lysosome	1	3.4426	3.735	0.9217	0.178	NA	0	0
Tb927.10.6780	vacuolar protein sorting-associated protein 45, putative (VPS45)	Lysosome	0.833	3.1796	3.9597	0.803	0.211	NA	0	0
Tb927.8.1200	vacuolar-type Ca2 -ATPase 2 (TbA2)	Lysosome	0.5	2.4426	3.9946	0.6115	0.27	NA	0	0
Tb927.5.1810	lysosomal/endosomal membrane protein p67 (p67)	Lysosome	0.333	1.8577	4.0377	0.4601	0.323	NA	0	0
Tb927.10.3760	vacuolar ATP synthase subunit d, putative	Lysosome	0.333	1.8577	4.0377	0.4601	0.323	NA	0	0
Tb927.10.200	vacuolar ATP synthase, putative	Lysosome	0.333	1.8577	4.0377	0.4601	0.323	NA	0	0
Tb927.8.2100	vacuolar ATP synthase 16 kDa proteolipid subunit, putative	Lysosome	0.167	0.9618	4.0805	0.2357	0.407	NA	0	0
Tb927.11.10010	vacuolar sorting-associated protein-like, putative	Lysosome	0.167	0.9618	4.0805	0.2357	0.407	NA	0	0
Tb927.3.5530	Tb-292 membrane associated protein	Membrane.protein	1.167	2.4809	3.2775	0.7569	0.225	NA	0	0
Tb927.5.390	75 kDa invariant surface glycoprotein (ISG75)	Membrane.protein	0.333	1.8577	4.0377	0.4601	0.323	NA	0	0
Tb927.9.9660	ATOM40	Mito.biogenesis	0.667	2.8577	3.9728	0.7193	0.236	NA	0	0
Tb927.11.11460	ATOM69 - POMP9	Mito.biogenesis	0.333	1.8577	4.0377	0.4601	0.323	NA	0	0
Tb927.10.6510	chaperonin HSP60, mitochondrial precursor	Mito.biogenesis	0.333	1.8577	4.0377	0.4601	0.323	NA	0	0
Tb927.7.5700	ATOM36	Mito.biogenesis	0.167	0.9618	4.0805	0.2357	0.407	NA	0	0
Tb927.11.7780	ATOM46	Mito.biogenesis	0.167	0.9618	4.0805	0.2357	0.407	NA	0	0
Tb927.9.11220	TIM42	Mito.biogenesis	0.167	0.9618	4.0805	0.2357	0.407	NA	0	0
Tb927.8.4150	TimRhomII	Mito.biogenesis	0.167	0.9618	4.0805	0.2357	0.407	NA	0	0
Tb927.10.6060	universal minicircle sequence binding protein (UMSBP)	Mito.DNA	46.333	0.8771	0.8689	1.0094	0.156	0.178	0	0
Tb927.10.6070	universal minicircle sequence binding protein (UMSBP)	Mito.DNA	29	0.166	0.9134	0.1818	0.428	0.441	0	0
Tb927.7.7430	ATP synthase F1, alpha subunit (ATPF1A)	Mito.e.transport	1.833	4.3171	2.7307	1.581	0.0569	0.0971	0	0
Tb927.10.730	ATP synthase, putative	Mito.e.transport	0.667	2.8577	3.9728	0.7193	0.236	NA	0	0
Tb927.10.9440	NADH dehydrogenase (54 NDH2) in TAO/G3PDH complex	Mito.e.transport	0.667	2.8577	3.9728	0.7193	0.236	NA	0	0
Tb927.10.180	ATP synthase F1 subunit gamma protein, putative (ATPF1G)	Mito.e.transport	0.167	0.9618	4.0805	0.2357	0.407	NA	0	0
Tb927.4.1540	POMP27, NAD-dependent epimerase, aldehyde reductase, one putative TM domain	Mito.membrane	1.667	4.1796	3.1278	1.3363	0.0907	0.121	0	0
Tb927.11.13180	POMP10	Mito.membrane	1	3.4426	3.7001	0.9304	0.176	NA	0	0
Tb927.6.4180	POMP32	Mito.membrane	0.333	1.8577	4.0377	0.4601	0.323	NA	0	0
Tb927.3.3130	POMP24	Mito.membrane	0.167	0.9618	4.0805	0.2357	0.407	NA	0	0
Tb927.10.3210	delta-1-pyrroline-5-carboxylate dehydrogenase, putative	Mito.pathway	2.167	4.5581	2.8072	1.6237	0.0522	0.0962	0	0
Tb927.11.5440	malic enzyme	Mito.pathway	1	3.4426	3.735	0.9217	0.178	NA	0	0
Tb927.10.9970	hypothetical protein, conserved	Mito.pathway	0.5	2.4426	3.9946	0.6115	0.27	NA	0	0
Tb11.v5.0613	NADH-dependent fumarate reductase, putative	Mito.pathway	0.333	1.8577	4.0377	0.4601	0.323	NA	0	0
Tb927.8.6800	hypothetical protein, conserved	Mito.pathway	1.333	1.5849	3.1102	0.5096	0.305	NA	0	0
Tb927.4.600	Alpha/beta hydrolase family, putative	Mito.pathway	0.167	0.9618	4.0805	0.2357	0.407	NA	0	0
Tb927.1.3950	D-alanine aminotransferase (ALAT)	Mito.pathway	0.167	0.9618	4.0805	0.2357	0.407	NA	0	0
Tb927.10.7610	hypothetical protein, conserved	Mito.pathway	0.167	0.9618	4.0805	0.2357	0.407	NA	0	0
Tb927.11.1400	hypothetical protein, conserved	Mito.pathway	0.167	0.9618	4.0805	0.2357	0.407	NA	0	0
Tb927.11.1620	hypothetical protein, conserved	Mito.pathway	0.167	0.9618	4.0805	0.2357	0.407	NA	0	0
Tb927.7.3810	hypothetical protein, conserved, , 2 Cold-shock domains	Mito.pathway	0.167	0.9618	4.0805	0.2357	0.407	NA	0	0
Tb927.3.4920	LETM1 and EF-hand domain-containing protein 1, inner mitochondrial membrane?	Mito.pathway	0.167	0.9618	4.0805	0.2357	0.407	NA	0	0
Tb927.11.7900	mitochondrial RNA binding protein 16 (RBP16)	Mito.RNA	1	3.4426	3.707	0.9287	0.177	NA	0	0
Tb927.11.13280	mitochondrial RNA binding protein 2 (GBP25)	Mito.RNA	0.833	3.1796	3.9597	0.803	0.211	NA	0	0
Tb927.4.4160	mitochondrial RNA binding protein MRB4160 MRB complex component	Mito.RNA	0.833	3.1796	3.9597	0.803	0.211	NA	0	0
Tb927.10.10830	RGG2, MRB complex component	Mito.RNA	1.333	2.7033	3.0944	0.8736	0.191	NA	0	0
Tb927.2.6070	mitochondrial RNA binding complex 1 subunit (MRB6070)	Mito.RNA	0.833	1.8959	3.6898	0.5138	0.304	NA	0	0
Tb927.8.8170	mitochondrial RNA binding protein 1, putative (MRB8170)	Mito.RNA	0.333	1.8577	4.0377	0.4601	0.323	NA	0	0
Tb927.11.1710	mitochondrial RNA binding protein 1,gBP21, MRP1 (GBP21)	Mito.RNA	0.167	0.9618	4.0805	0.2357	0.407	NA	0	0
Tb927.10.14840	mitochondrial carrier protein, MCP5c	Mito.transport	2.167	4.5581	2.5973	1.755	0.0396	0.0803	0	0
Tb927.9.10310	mitochondrial carrier protein, MCP11	Mito.transport	1.167	3.665	3.4895	1.0503	0.147	NA	0	0
Tb927.10.12840	mitochondrial carrier protein, MCP12	Mito.transport	0.5	2.4426	3.9946	0.6115	0.27	NA	0	0
Tb927.11.5290	mitochondrial carrier protein, MCP9	Mito.transport	0.5	2.4426	3.9946	0.6115	0.27	NA	0	0
Tb927.2.2970	mitochondrial carrier protein, MCP13	Mito.transport	0.333	1.8577	4.0377	0.4601	0.323	NA	0	0
Tb927.11.14360	mitochondrial carrier protein, MCP2	Mito.transport	0.333	1.8577	4.0377	0.4601	0.323	NA	0	0
Tb11.v5.0827	Nucleoporin NUP-1 protein, putative	Nuclear.transport	1.667	3.0658	3.1875	0.9618	0.168	0.189	0	0
Tb927.11.980	TbNup158 Outer ring, FG Nup facing both sides	Nuclear.transport	0.667	2.8577	3.9728	0.7193	0.236	NA	0	0
Tb927.3.1120	Ran or RTB2	Nuclear.transport	3.667	2.663	2.0528	1.2972	0.0973	0.125	0	0
Tb927.10.9650	TbNup152 Outer ring	Nuclear.transport	0.5	2.4426	3.9946	0.6115	0.27	NA	0	0
Tb927.9.14240	TbNup82 Outer ring	Nuclear.transport	0.5	2.4426	3.9946	0.6115	0.27	NA	0	0
Tb927.10.7060	TbNup96 Inner ring	Nuclear.transport	0.5	2.4426	3.9946	0.6115	0.27	NA	0	0
Tb11.v5.0837	importin beta-1 subunit, putative	Nuclear.transport	0.5	2.4426	3.9946	0.6115	0.27	NA	0	0
Tb927.6.4740	importin-alpha re-exporter protein, putative	Nuclear.transport	0.333	1.8577	4.0377	0.4601	0.323	NA	0	0
Tb927.7.2300	TbNup132 Outer ring	Nuclear.transport	0.333	1.8577	4.0377	0.4601	0.323	NA	0	0
Tb927.10.8170	TbNup144 Outer-inner connect	Nuclear.transport	0.333	1.8577	4.0377	0.4601	0.323	NA	0	0
Tb927.11.2950	TbNup89 Outer ring	Nuclear.transport	0.333	1.8577	4.0377	0.4601	0.323	NA	0	0
Tb927.10.14180	TbSec13 Outer ring nucleoporin	Nuclear.transport	0.333	1.8577	4.0377	0.4601	0.323	NA	0	0
Tb927.9.3760	poly(A) export protein, putative (TbGLE2)	Nuclear.transport	0.167	0.9618	4.0805	0.2357	0.407	NA	0	0
Tb927.11.15990	TbNup109 Outer ring	Nuclear.transport	0.167	0.9618	4.0805	0.2357	0.407	NA	0	0
Tb927.11.9780	TbNup119 Outer-inner connect	Nuclear.transport	0.167	0.9618	4.0805	0.2357	0.407	NA	0	0
Tb927.4.2880	TbNup225 Inner ring	Nuclear.transport	0.167	0.9618	4.0805	0.2357	0.407	NA	0	0
Tb927.11.4540	TbNup48 Connect to basket	Nuclear.transport	0.167	0.9618	4.0805	0.2357	0.407	NA	0	0
Tb927.8.4430	uridine phosphorylase	Nucleotides	2.167	4.5581	2.8101	1.622	0.0524	0.0962	0	0
Tb927.10.1390	hypoxanthine-guanine phosphoribosyltransferase, putative	Nucleotides	2.167	4.5581	2.8467	1.6012	0.0547	0.0964	0	0
Tb927.6.2360	adenosine kinase, putative	Nucleotides	1.333	3.8577	3.3236	1.1607	0.123	NA	0	0
Tb927.5.3810	orotidine-5-phosphate decarboxylase/orotate phosphoribosyltransferase, OMPDCase-OPRTase	Nucleotides	1	3.4426	3.707	0.9287	0.177	NA	0	0
Tb927.11.7840	ribonucleoside-diphosphate reductase large chain (RNR1)	Nucleotides	1	3.4426	3.735	0.9217	0.178	NA	0	0
Tb927.5.4560	guanine deaminase, putative	Nucleotides	3.167	3.0874	2.1622	1.4279	0.0767	0.109	0	0
Tb927.3.2960	inosine-adenosine-guanosine-nucleosidehydrolase (IAGNH)	Nucleotides	0.667	2.8577	3.9728	0.7193	0.236	NA	0	0
Tb927.11.12820	ribonucleoside-diphosphate reductase small chain (RNR2)	Nucleotides	0.667	2.8577	3.9728	0.7193	0.236	NA	0	0
Tb927.9.7180	adenosine monophosphate deaminase, putative,AMP deaminase, putative	Nucleotides	0.5	2.4426	3.9946	0.6115	0.27	NA	0	0
Tb927.11.16130	nucleoside diphosphate kinase (NDPK)	Nucleotides	0.5	2.4426	3.9946	0.6115	0.27	NA	0	0
Tb927.7.1780	Adenine phosphoribosyltransferase, putative	Nucleotides	0.333	1.8577	4.0377	0.4601	0.323	NA	0	0
Tb927.2.6220	adenosine transporter 2, putative (TbNT4)	Nucleotides	0.333	1.8577	4.0377	0.4601	0.323	NA	0	0
Tb927.5.3820	aspartate carbamoyltransferase, putative	Nucleotides	0.333	1.8577	4.0377	0.4601	0.323	NA	0	0
Tb927.1.1240	CTP synthase	Nucleotides	0.333	1.8577	4.0377	0.4601	0.323	NA	0	0
Tb927.5.2080	guanosine monophosphate reductase, putative	Nucleotides	0.333	1.8577	4.0377	0.4601	0.323	NA	0	0
Tb927.10.16120	inosine-5'-monophosphate dehydrogenase,IMP dehydrogenase	Nucleotides	0.333	1.8577	4.0377	0.4601	0.323	NA	0	0
Tb927.9.7550	adenylosuccinate lyase, putative	Nucleotides	0.167	0.9618	4.0805	0.2357	0.407	NA	0	0
Tb927.11.15750	AMP deaminase, putative	Nucleotides	0.167	0.9618	4.0805	0.2357	0.407	NA	0	0
Tb927.9.9740	AMP deaminase, putative	Nucleotides	0.167	0.9618	4.0805	0.2357	0.407	NA	0	0
Tb927.7.2100	GMP synthase	Nucleotides	0.167	0.9618	4.0805	0.2357	0.407	NA	0	0
Tb927.7.4570	inosine-guanine nucleoside hydrolase (IG-NH)	Nucleotides	0.167	0.9618	4.0805	0.2357	0.407	NA	0	0
Tb927.5.3170	ribose-phosphate pyrophosphokinase, putative (PRPS5)	PPP	1.833	4.3171	2.9712	1.453	0.0731	0.108	0	0
Tb927.11.3030	phosphoribosylpyrophosphate synthetase, putative (PRS)	PPP	1.167	3.665	3.4998	1.0472	0.148	NA	0	0
Tb927.11.8970	ribose 5-phosphate isomerase, putative	PPP	1	3.4426	3.7001	0.9304	0.176	NA	0	0
Tb927.9.12110	6-phosphogluconate dehydrogenase, decarboxylating (gnD)	PPP	0.333	1.8577	4.0377	0.4601	0.323	NA	0	0
Tb927.11.1020	ribokinase, putative	PPP	0.333	1.8577	4.0377	0.4601	0.323	NA	0	0
Tb927.5.2960	phosphoribosylpyrophosphate synthetase, putative (PRS)	PPP	0.167	0.9618	4.0805	0.2357	0.407	NA	0	0
Tb927.10.14790	aminopeptidase, putative,metallo-peptidase, Clan MG, Family M24	Protease	1.5	4.0276	3.1879	1.2634	0.103	0.125	0	0
Tb927.9.8950	CAAX prenyl protease 1, putative,metallo- peptidase, Clan M- Family M48	Protease	1.333	3.8577	3.0783	1.2532	0.105	NA	0	0
Tb927.10.8020	prolyl endopeptidase (POP)	Protease	1.167	3.665	3.5305	1.0381	0.15	NA	0	0
Tb927.10.6970	dipeptidyl-peptidase 8-like serine peptidase,serine peptidase, Clan SC, Family S9B	Protease	1	3.4426	3.707	0.9287	0.177	NA	0	0
Tb927.11.12850	oligopeptidase b (OPB)	Protease	0.833	3.1796	3.9597	0.803	0.211	NA	0	0
Tb927.8.8330	calpain, putative,cysteine peptidase, putative	Protease	9	2.7472	1.3708	2.0042	0.0225	0.0556	0	0
Tb927.9.14220	metacaspase MCA5	Protease	0.5	2.4426	3.9946	0.6115	0.27	NA	0	0
Tb927.5.2700	otubain cysteine peptidase, Clan CA, family C65, putative	Protease	0.5	2.4426	3.9946	0.6115	0.27	NA	0	0
Tb927.8.7020	peptidase, putative	Protease	0.5	2.4426	3.9946	0.6115	0.27	NA	0	0
Tb927.9.13490	aminopeptidase P, putative,metallo-peptidase, Clan MG, Family M24	Protease	0.333	1.8577	4.0377	0.4601	0.323	NA	0	0
Tb927.11.2470	aminopeptidase, putative,metallo-peptidase, Clan MF, Family M17	Protease	0.333	1.8577	4.0377	0.4601	0.323	NA	0	0
Tb927.10.1890	calpain, putative,cysteine peptidase, Clan CA, family C2, putative	Protease	0.333	1.8577	4.0377	0.4601	0.323	NA	0	0
Tb927.3.3410	aspartyl aminopeptidase, putative,metallo-peptidase, Clan MH, Family M20	Protease	0.167	0.9618	4.0805	0.2357	0.407	NA	0	0
Tb927.1.2120	calpain, putative,cysteine peptidase, Clan CA, family C2, putative	Protease	0.167	0.9618	4.0805	0.2357	0.407	NA	0	0
Tb927.1.2100	calpain-like cysteine peptidase, putative,cysteine peptidase, Clan CA, family C2, putative	Protease	0.167	0.9618	4.0805	0.2357	0.407	NA	0	0
Tb927.4.1840	Carboxypeptidase Nna1-like protein, putative	Protease	0.167	0.9618	4.0805	0.2357	0.407	NA	0	0
Tb927.8.1810	rhomboid-like protein	Protease	0.167	0.9618	4.0805	0.2357	0.407	NA	0	0
Tb927.10.5140	protein kinase, putative,mitogen-activated protein kinase 2, putative	Protein.kinase	2.667	4.8577	2.6343	1.844	0.0326	0.069	0	0
Tb927.10.14770	AKB1 protein kinase	Protein.kinase	1.333	3.8577	3.3694	1.1449	0.126	NA	0	0
Tb927.3.3190	NEK7 protein kinase	Protein.kinase	0.833	3.1796	3.9597	0.803	0.211	NA	0	0
Tb927.9.6560	protein kinase, putative	Protein.kinase	0.833	3.1796	3.9597	0.803	0.211	NA	0	0
Tb927.9.11100	PKAC1 protein kinase A catalytic subunit isoform 1	Protein.kinase	0.5	2.4426	3.9946	0.6115	0.27	NA	0	0
Tb927.10.13010	protein kinase A catalytic subunit 3(PKAC3)	Protein.kinase	0.333	1.8577	4.0377	0.4601	0.323	NA	0	0
Tb927.6.2250	RAC serine-threonine kinase	Protein.kinase	0.333	1.8577	4.0377	0.4601	0.323	NA	0	0
Tb927.4.5310	NEK12.3 protein kinase (RDK2)	Protein.kinase	0.167	0.9618	4.0805	0.2357	0.407	NA	0	0
Tb927.7.940	protein kinase C substrate protein, heavy chain, putative,glucosidase II beta subunit, putative	Protein.kinase	0.167	0.9618	4.0805	0.2357	0.407	NA	0	0
Tb927.11.10820	protein kinase ck2 regulatory subunit beta, putative	Protein.kinase	0.167	0.9618	4.0805	0.2357	0.407	NA	0	0
Tb927.11.9190	protein kinase, putative	Protein.kinase	0.167	0.9618	4.0805	0.2357	0.407	NA	0	0
Tb927.6.1800	protein phosphatase 2C, putative	Protein.phosphatase	1.333	3.8577	3.3198	1.162	0.123	NA	0	0
Tb927.5.4380	kinetoplastid-specific phospho-protein phosphatase, putative	Protein.phosphatase	1.167	3.665	3.4895	1.0503	0.147	NA	0	0
Tb927.4.3640	protein phosphatase 1, putative	Protein.phosphatase	0.667	2.8577	3.9728	0.7193	0.236	NA	0	0
Tb927.11.16970	protein phosphatase 4, putative	Protein.phosphatase	0.333	1.8577	4.0377	0.4601	0.323	NA	0	0
Tb927.10.4180	TFIIF-stimulated CTD phosphatase, putative	Protein.phosphatase	0.333	1.8577	4.0377	0.4601	0.323	NA	0	0
Tb927.8.1990	mitochondrial peroxiredoxin (TRYP2)	Redox	2.667	4.8577	2.6312	1.8462	0.0324	0.069	0	0
Tb927.3.3780	tryparedoxin	Redox	1.667	4.1796	3.0649	1.3637	0.0863	0.117	0	0
Tb927.10.10390	trypanothione reductase	Redox	1.333	3.8577	3.3694	1.1449	0.126	NA	0	0
Tb927.7.4000	glutathione synthetase, putative	Redox	0.5	2.4426	3.9946	0.6115	0.27	NA	0	0
Tb927.3.5090	tryparedoxin, putative	Redox	0.5	2.4426	3.9946	0.6115	0.27	NA	0	0
Tb927.4.2450	Protein Disulfide Isomerase 1	Redox	0.333	1.8577	4.0377	0.4601	0.323	NA	0	0
Tb927.9.5860	tryparedoxin peroxidase	Redox	1.667	1.2224	2.4074	0.5078	0.306	0.324	0	0
Tb11.v5.0713	retrotransposon hot spot (RHS) protein, putative	RHS	3.167	5.1056	2.5059	2.0374	0.0208	0.0524	0	0
Tb927.2.280	retrotransposon hot spot protein 2 (RHS2), putative	RHS	1.667	4.1796	2.8144	1.4851	0.0688	0.107	0	0
Tb927.2.1210	retrotransposon hot spot protein 4 (RHS4), putative	RHS	1.5	4.0276	3.1827	1.2655	0.103	0.125	0	0
Tb927.2.240	retrotransposon hot spot protein 5 (RHS5), putative	RHS	1.167	3.665	3.5305	1.0381	0.15	NA	0	0
Tb927.2.820	retrotransposon hot spot protein (RHS1, pseudogene), putative	RHS	0.833	3.1796	3.9597	0.803	0.211	NA	0	0
Tb927.1.90	retrotransposon hot spot protein (RHS, pseudogene), putative	RHS	0.667	2.8577	3.9728	0.7193	0.236	NA	0	0
Tb927.2.470	retrotransposon hot spot protein 4 (RHS4), putative	RHS	3.667	2.663	1.8461	1.4424	0.0746	0.108	0	0
Tb11.1790	retrotransposon hot spot protein (RHS, pseudogene), putative	RHS	0.5	2.4426	3.9946	0.6115	0.27	NA	0	0
Tb11.1780	retrotransposon hot spot protein (RHS1, pseudogene), putative	RHS	0.5	2.4426	3.9946	0.6115	0.27	NA	0	0
Tb927.1.180	retrotransposon hot spot protein 1 (RHS1), putative	RHS	0.5	2.4426	3.9946	0.6115	0.27	NA	0	0
Tb927.2.340	retrotransposon hot spot protein 4 (RHS4), putative	RHS	0.5	2.4426	3.9946	0.6115	0.27	NA	0	0
Tb927.2.450	retrotransposon hot spot protein 4 (RHS4), putative	RHS	0.5	2.4426	3.9946	0.6115	0.27	NA	0	0
Tb927.1.120	retrotransposon hot spot protein 4 (RHS4), putative	RHS	7	2.0875	1.6073	1.2987	0.097	0.125	0	0
Tb11.v5.0489	retrotransposon hot spot protein (RHS, pseudogene)	RHS	0.333	1.8577	4.0377	0.4601	0.323	NA	0	0
Tb927.4.110	retrotransposon hot spot protein (RHS1, pseudogene), putative	RHS	0.333	1.8577	4.0377	0.4601	0.323	NA	0	0
Tb927.2.1180	retrotransposon hot spot protein 3 (RHS3), putative	RHS	0.333	1.8577	4.0377	0.4601	0.323	NA	0	0
Tb927.2.560	retrotransposon hot spot protein 4 (RHS4), putative	RHS	0.333	1.8577	4.0377	0.4601	0.323	NA	0	0
Tb11.v5.0624	retrotransposon hot spot protein (PHS), putative	RHS	0.333	1.8577	4.0377	0.4601	0.323	NA	0	0
Tb11.v5.0325	retrotransposon hot spot (RHS) protein, putative	RHS	0.167	0.9618	4.0805	0.2357	0.407	NA	0	0
Tb927.1.190	retrotransposon hot spot protein (RHS, pseudogene)	RHS	0.167	0.9618	4.0805	0.2357	0.407	NA	0	0
Tb927.1.330	retrotransposon hot spot protein (RHS, pseudogene), putative	RHS	0.167	0.9618	4.0805	0.2357	0.407	NA	0	0
Tb927.2.830	retrotransposon hot spot protein (RHS1, pseudogene), putative	RHS	0.167	0.9618	4.0805	0.2357	0.407	NA	0	0
Tb927.2.1140	retrotransposon hot spot protein (RHS3, pseudogene), putative	RHS	0.167	0.9618	4.0805	0.2357	0.407	NA	0	0
Tb927.2.270	retrotransposon hot spot protein (RHS3, pseudogene), putative	RHS	0.167	0.9618	4.0805	0.2357	0.407	NA	0	0
Tb927.2.510	retrotransposon hot spot protein 4 (RHS4), putative	RHS	0.167	0.9618	4.0805	0.2357	0.407	NA	0	0
Tb11.v5.0594	retrotransposon hot spot (RHS) protein, putative	RHS	0.167	0.9618	4.0805	0.2357	0.407	NA	0	0
Tb09.v4.0067	retrotransposon hot spot protein, pseudogene	RHS	0.5	0.8959	4.0377	0.2219	0.412	NA	0	0
Tb927.3.3320	60S ribosomal protein L13	Ribosome	5.167	5.8118	3.9153	1.4844	0.0689	0.107	0	0
Tb927.10.1100	60S ribosomal protein L9	Ribosome	2.667	4.8577	2.6312	1.8462	0.0324	0.069	0	0
Tb927.4.2180	60S ribosomal protein L35a	Ribosome	2.667	4.8577	2.6482	1.8343	0.0333	0.0698	0	0
Tb927.3.5050	60S ribosomal protein L4	Ribosome	2.667	4.8577	2.6819	1.8113	0.035	0.0729	0	0
Tb927.11.14130	60S ribosomal protein L18	Ribosome	2.5	4.7646	2.4753	1.9249	0.0271	0.0638	0	0
Tb927.5.1110	60S ribosomal protein L2 L8	Ribosome	2.333	4.6651	2.4665	1.8913	0.0293	0.0661	0	0
Tb927.10.11390	60S ribosomal protein L6	Ribosome	2.167	4.5581	2.8101	1.622	0.0524	0.0962	0	0
Tb927.9.8420	60S ribosomal protein L10	Ribosome	2	4.4426	2.9169	1.5231	0.0639	0.102	0	0
Tb927.11.15900	60S ribosomal protein L27	Ribosome	1.833	4.3171	2.7481	1.571	0.0581	0.0976	0	0
Tb927.11.13007	ubiquitin-60S ribosomal protein L40	Ribosome	3.167	4.0658	2.1747	1.8696	0.0308	0.0688	0	0
Tb927.11.7685	ribosomal protein S10p/S20	Ribosome	1.5	4.0276	2.9278	1.3756	0.0845	0.117	0	0
Tb927.11.4300	60S ribosomal protein L18	Ribosome	1.5	4.0276	3.1879	1.2634	0.103	0.125	0	0
Tb927.7.5020	60S ribosomal protein L19	Ribosome	1.333	3.8577	3.3236	1.1607	0.123	NA	0	0
Tb927.8.1340	60S ribosomal protein L7a	Ribosome	1.333	3.8577	3.3694	1.1449	0.126	NA	0	0
Tb927.5.1610	60S ribosomal protein L13a	Ribosome	1.167	3.665	3.4998	1.0472	0.148	NA	0	0
Tb927.7.1750	60S ribosomal protein L7	Ribosome	1.167	3.665	3.1826	1.1516	0.125	NA	0	0
Tb927.11.6510	40S ribosomal protein S21	Ribosome	1	3.4426	3.735	0.9217	0.178	NA	0	0
Tb927.9.11410	60S ribosomal protein L23	Ribosome	1	3.4426	3.7001	0.9304	0.176	NA	0	0
Tb927.11.9730	60S ribosomal protein L34	Ribosome	1	3.4426	3.707	0.9287	0.177	NA	0	0
Tb927.10.4120	60S ribosomal protein L30	Ribosome	1	3.4426	3.707	0.9287	0.177	NA	0	0
Tb927.9.3990	40S ribosomal protein S7	Ribosome	3.667	3.3219	2.0259	1.6397	0.0505	0.0962	0	0
Tb927.10.1090	40S ribosomal protein S23	Ribosome	3.5	3.2479	2.0169	1.6104	0.0537	0.0964	0	0
Tb927.10.5480	60S ribosomal protein L24	Ribosome	0.833	3.1796	3.9597	0.803	0.211	NA	0	0
Tb927.9.14370	60S ribosomal protein L26	Ribosome	0.833	3.1796	3.9597	0.803	0.211	NA	0	0
Tb927.4.1860	40S ribosomal protein S19	Ribosome	0.667	2.8577	3.9728	0.7193	0.236	NA	0	0
Tb927.8.6160	40S ribosomal protein S8	Ribosome	0.667	2.8577	3.9728	0.7193	0.236	NA	0	0
Tb927.9.15190	60S ribosomal protein L15	Ribosome	0.667	2.8577	3.9728	0.7193	0.236	NA	0	0
Tb927.7.1050	40S ribosomal protein S16	Ribosome	1.333	2.7033	3.0944	0.8736	0.191	NA	0	0
Tb927.11.10910	40S ribosomal protein SA	Ribosome	7	2.585	1.3562	1.9061	0.0283	0.0645	0	0
Tb927.11.9720	40S ribosomal protein S27	Ribosome	0.5	2.4426	3.9946	0.6115	0.27	NA	0	0
Tb927.10.190	40S ribosomal protein S6	Ribosome	0.5	2.4426	3.9946	0.6115	0.27	NA	0	0
Tb927.9.7620	60S ribosomal protein L11	Ribosome	0.5	2.4426	3.9946	0.6115	0.27	NA	0	0
Tb927.10.5340	40S ribosomal protein S18	Ribosome	3.5	2.0875	1.8222	1.1456	0.126	0.146	0	0
Tb927.6.4980	40S ribosomal protein S14	Ribosome	7.167	1.9175	1.3278	1.4442	0.0743	0.108	0	0
Tb927.7.2370	40S ribosomal protein S15	Ribosome	0.333	1.8577	4.0377	0.4601	0.323	NA	0	0
Tb927.3.4360	40S ribosomal protein S15A	Ribosome	0.333	1.8577	4.0377	0.4601	0.323	NA	0	0
Tb927.4.1100	60S ribosomal protein L21e	Ribosome	0.333	1.8577	4.0377	0.4601	0.323	NA	0	0
Tb927.9.9210	60S ribosomal protein L37	Ribosome	0.333	1.8577	4.0377	0.4601	0.323	NA	0	0
Tb927.10.6370	60S ribosomal protein L37a	Ribosome	0.333	1.8577	4.0377	0.4601	0.323	NA	0	0
Tb927.11.8200	40S ribosomal protein S26	Ribosome	9.167	1.8413	1.4021	1.3132	0.0946	0.124	0	0
Tb927.7.240	40S ribosomal protein S33	Ribosome	2	1.585	2.2643	0.7	0.242	0.263	0	0
Tb927.10.5370	40S ribosomal protein S10	Ribosome	10.5	1.4361	1.17	1.2274	0.11	0.13	0	0
Tb927.11.11830	40S ribosomal protein S17	Ribosome	0.167	0.9618	4.0805	0.2357	0.407	NA	0	0
Tb927.10.7340	40S ribosomal protein S24E	Ribosome	0.167	0.9618	4.0805	0.2357	0.407	NA	0	0
Tb927.10.8200	60S Ribosomal protein L1	Ribosome	0.167	0.9618	4.0805	0.2357	0.407	NA	0	0
Tb927.9.14000	60S ribosomal protein L12	Ribosome	0.167	0.9618	4.0805	0.2357	0.407	NA	0	0
Tb927.11.4820	60S ribosomal protein L17	Ribosome	0.167	0.9618	4.0805	0.2357	0.407	NA	0	0
Tb927.11.4460	ALBA1	RNA.binding	2.833	4.9452	2.5833	1.9143	0.0278	0.0639	0	0
Tb927.10.5250	ZC3H32	RNA.binding	1.667	4.1796	2.8144	1.4851	0.0688	0.107	0	0
Tb927.8.3850	PSP1 C-terminal conserved region, putative	RNA.binding	2.833	3.8959	2.4487	1.591	0.0558	0.0965	0	0
Tb927.4.2030	ALBA4	RNA.binding	1.333	3.8577	3.3694	1.1449	0.126	NA	0	0
Tb927.11.14750	PSP1 C-terminal conserved region, putative	RNA.binding	1.333	3.8577	3.3236	1.1607	0.123	NA	0	0
Tb927.8.1500	hypothetical protein, conserved, copurifies with MKT1	RNA.binding	5.333	3.273	1.6378	1.9984	0.0228	0.0558	0	0
Tb927.10.15310	hypothetical protein, conserved, linked to melarsoprol resistance, no yeast/human by NCBI	RNA.binding	0.833	3.1796	3.9597	0.803	0.211	NA	0	0
Tb927.11.5150	hypothetical protein, conserved, no homologues	RNA.binding	0.833	3.1796	3.9597	0.803	0.211	NA	0	0
Tb927.11.14220	hypothetical protein, conserved, Phyre2 gives 97% probability of RNA-binding domain, on Diana polysomes	RNA.binding	0.833	3.1796	3.9597	0.803	0.211	NA	0	0
Tb927.10.12330	ZC3H34	RNA.binding	0.833	3.1796	3.9597	0.803	0.211	NA	0	0
Tb927.11.7140	cell cycle sequence binding phosphoprotein CSB)II	RNA.binding	0.667	2.8577	3.9728	0.7193	0.236	NA	0	0
Tb927.7.3980	immunodominant antigen, putative,tc40 antigen-like	RNA.binding	0.667	2.8577	3.9728	0.7193	0.236	NA	0	0
Tb927.3.5250	ZC3H8	RNA.binding	0.667	2.8577	3.9728	0.7193	0.236	NA	0	0
Tb927.3.720	ZFP3	RNA.binding	0.667	2.8577	3.9728	0.7193	0.236	NA	0	0
Tb927.3.1030	RBP28	RNA.binding	5.167	2.7549	1.8668	1.4757	0.07	0.108	0	0
Tb927.10.12090	RBP7A	RNA.binding	1.333	2.7033	3.0944	0.8736	0.191	NA	0	0
Tb927.10.13720	RBP29	RNA.binding	5	2.7004	1.7982	1.5017	0.0666	0.106	0	0
Tb927.4.4580	hypothetical protein, conserved, no clear yeast or human matches	RNA.binding	1.167	2.4809	3.2775	0.7569	0.225	NA	0	0
Tb927.1.2600	PUF9	RNA.binding	0.5	2.4426	3.9946	0.6115	0.27	NA	0	0
Tb927.7.320	RBP8	RNA.binding	0.5	2.4426	3.9946	0.6115	0.27	NA	0	0
Tb927.11.12120	RBP9	RNA.binding	0.5	2.4426	3.9946	0.6115	0.27	NA	0	0
Tb927.11.14950	ZFP2	RNA.binding	1.833	2.1699	2.5913	0.8374	0.201	0.223	0	0
Tb927.7.7460	hypothetical protein, conserved, no domains	RNA.binding	7.667	2.0395	1.2752	1.5994	0.0549	0.0964	0	0
Tb927.4.3400	hypothetical protein, conserved, ARM repeat	RNA.binding	0.333	1.8577	4.0377	0.4601	0.323	NA	0	0
Tb927.11.2250	hypothetical protein, conserved, kineto-specific	RNA.binding	0.333	1.8577	4.0377	0.4601	0.323	NA	0	0
Tb927.10.9330	hypothetical protein, conserved, partial PSP1 superfamily (signal peptidase-like), copuriifes with ZC3H12	RNA.binding	0.333	1.8577	4.0377	0.4601	0.323	NA	0	0
Tb927.11.3500	hypothetical protein, RBD	RNA.binding	0.333	1.8577	4.0377	0.4601	0.323	NA	0	0
Tb927.9.9520	ZC3H29	RNA.binding	4.167	1.663	1.6608	1.0013	0.158	0.179	0	0
Tb927.11.4450	ALBA2	RNA.binding	0.667	1.4809	3.9946	0.3707	0.355	NA	0	0
Tb927.6.820	PUF4	RNA.binding	0.667	1.4809	3.6861	0.4017	0.344	NA	0	0
Tb927.9.13990	DRBD2	RNA.binding	8	1.4288	1.3667	1.0455	0.148	0.169	0	0
Tb927.8.2780	RBP10	RNA.binding	2.333	1.3219	2.136	0.6189	0.268	0.29	0	0
Tb927.9.8740	DRBD3 (PTB1)	RNA.binding	17	1.263	0.9466	1.3343	0.0911	0.121	0	0
Tb927.10.310	PUF3	RNA.binding	1.667	1.2224	2.5987	0.4704	0.319	0.333	0	0
Tb927.1.3070	hypothetical protein, conserved, poly(Q), poly(H)	RNA.binding	2.167	1.1699	2.0591	0.5682	0.285	0.306	0	0
Tb927.3.3940	DRBD11	RNA.binding	3	1	1.7626	0.5674	0.285	0.306	0	0
Tb927.5.760	cell cycle sequence binding phosphoprotein (RBP33), CSBP2	RNA.binding	0.167	0.9618	4.0805	0.2357	0.407	NA	0	0
Tb927.7.1100	hypothetical protein, conserved	RNA.binding	0.167	0.9618	4.0805	0.2357	0.407	NA	0	0
Tb927.10.11990	hypothetical protein, conserved,RNA-binding protein	RNA.binding	0.167	0.9618	4.0805	0.2357	0.407	NA	0	0
Tb927.11.4180	PSP1 C-terminal conserved region, putative	RNA.binding	0.167	0.9618	4.0805	0.2357	0.407	NA	0	0
Tb927.11.10810	PUF11	RNA.binding	0.167	0.9618	4.0805	0.2357	0.407	NA	0	0
Tb927.8.4450	RBP11	RNA.binding	0.167	0.9618	4.0805	0.2357	0.407	NA	0	0
Tb927.11.16590	RBP37	RNA.binding	0.167	0.9618	4.0805	0.2357	0.407	NA	0	0
Tb927.10.1540	ZC3H30	RNA.binding	0.167	0.9618	4.0805	0.2357	0.407	NA	0	0
Tb927.10.12740	ZC3H35	RNA.binding	0.167	0.9618	4.0805	0.2357	0.407	NA	0	0
Tb927.10.12800	ZC3H38	RNA.binding	0.167	0.9618	4.0805	0.2357	0.407	NA	0	0
Tb927.10.14930	ZC3H39	RNA.binding	0.167	0.9618	4.0805	0.2357	0.407	NA	0	0
Tb927.10.14950	ZC3H40	RNA.binding	0.167	0.9618	4.0805	0.2357	0.407	NA	0	0
Tb927.11.16550	ZC3H46	RNA.binding	0.167	0.9618	4.0805	0.2357	0.407	NA	0	0
Tb927.10.14700	hypothetical protein, conserved, no human or yeast homologue	RNA.binding	3.333	0.8931	1.6795	0.5318	0.297	0.318	0	0
Tb927.6.2210	hypothetical protein, conserved, copurifies with ZC3H32 and 4E-IP	RNA.binding	3.667	0.8074	2.0344	0.3969	0.346	0.359	0	0
Tb927.11.6440	hypothetical protein, conserved, Bromodomain and poly(Q), often in TAP MS, low similarity to coiled-coil proteins and hook proteins (cytoskeletal linkers)	RNA.binding	12.5	0.5052	1.015	0.4978	0.309	0.324	0	0
Tb927.6.4440	RBP42	RNA.binding	16	0.4854	0.9601	0.5056	0.307	0.324	0	0
Tb927.10.11760	PUF6	RNA.binding	2	0	2.4428	0	0.5	0.513	0	0
Tb927.7.3730	RBP26	RNA.binding	1.333	0	2.8277	0	0.5	NA	0	0
Tb927.11.510	UBP2	RNA.binding	6.333	-0.4594	1.344	0	0.634	NA	0	0
Tb927.4.400	DRBD7	RNA.binding	1.5	-1.8073	2.9606	0	0.729	NA	0	0
Tb927.11.530	RBP3	RNA.binding	3.167	-2.415	1.9372	0	0.894	NA	0	0
Tb927.10.12660	PUF2	RNA.binding	3.333	-4.1438	2.3868	0	0.959	NA	0	0
Tb927.5.2140	UPF1	RNA.degradation	1.167	3.665	3.4895	1.0503	0.147	NA	0	0
Tb927.6.600	CAF1	RNA.degradation	0.333	1.8577	4.0377	0.4601	0.323	NA	0	0
Tb927.10.8720	NOT10	RNA.degradation	0.333	1.8577	4.0377	0.4601	0.323	NA	0	0
Tb927.3.2490	P-loop nucloside phosphate hydrolase, PH domain-like	RNA.degradation	0.333	1.8577	4.0377	0.4601	0.323	NA	0	0
Tb11.v5.0807	ribonuclease, putative	RNA.degradation	0.333	1.8577	4.0377	0.4601	0.323	NA	0	0
Tb927.11.550	SCD6	RNA.degradation	7.5	1.1468	1.4797	0.7751	0.219	0.24	0	0
Tb927.9.9060	LSM12	RNA.degradation	0.167	0.9618	4.0805	0.2357	0.407	NA	0	0
Tb927.7.4900	XRNA	RNA.degradation	0.5	0.8959	4.0377	0.2219	0.412	NA	0	0
Tb927.10.540	ATP-dependent DEAD/H RNA helicase, DDX39-like, no clear yeast homologue. Named as orthologue of TcSUB2, RNAi causes poly(A) accumulation in nucleus.	RNA.helicase	4.333	4.5398	2.2073	2.0567	0.0199	0.0506	0	0
Tb927.2.5240	PRP19-like protein, putative (TbPRP19)	RNA.processing	1.667	4.1796	3.0649	1.3637	0.0863	0.117	0	0
Tb927.7.3780	PAP1 poly(A) polymerase, major PAP, associated with MTR4 complex	RNA.processing	0.833	3.1796	3.9597	0.803	0.211	NA	0	0
Tb927.7.6980	U2 splicing factor putative, SF3b(SAP)130	RNA.processing	0.833	3.1796	3.6181	0.8788	0.19	NA	0	0
Tb927.8.900	splicing factor TSR1 (TSR1)	RNA.processing	6.333	2.7225	1.6527	1.6473	0.0497	0.0962	0	0
Tb927.4.1340	CPSF73	RNA.processing	0.5	2.4426	3.9946	0.6115	0.27	NA	0	0
Tb927.2.4710	TRRM1	RNA.processing	13.167	2.0931	1.3157	1.5908	0.0558	0.0965	0	0
Tb927.11.14560	CPSF160	RNA.processing	0.333	1.8577	4.0377	0.4601	0.323	NA	0	0
Tb927.9.14120	NIF superfamily phosphatase domain, possible splicing factor	RNA.processing	0.333	1.8577	4.0377	0.4601	0.323	NA	0	0
Tb927.7.1390	RBSR2	RNA.processing	0.333	1.8577	4.0377	0.4601	0.323	NA	0	0
Tb927.6.2700	small nuclear ribonucleoprotein Sm-E	RNA.processing	0.333	1.8577	4.0377	0.4601	0.323	NA	0	0
Tb927.2.3880	HNRNPH/F	RNA.processing	3.667	1.0995	2.1929	0.5014	0.308	0.324	0	0
Tb927.6.1830	CstF50	RNA.processing	0.167	0.9618	4.0805	0.2357	0.407	NA	0	0
Tb927.3.3160	poly(A) polymerase,polynucleotide adenylyltransferase (PAP). Cis-spliced.	RNA.processing	0.167	0.9618	4.0805	0.2357	0.407	NA	0	0
Tb927.9.11110	PRP8 protein homologue,U5 snRNA-associated splicing factor	RNA.processing	0.167	0.9618	4.0805	0.2357	0.407	NA	0	0
Tb927.8.7490	Symplekin	RNA.processing	0.167	0.9618	4.0805	0.2357	0.407	NA	0	0
Tb927.11.15690	U5 snRNP-associated 102 kDa protein,U5-102K putative	RNA.processing	0.167	0.9618	4.0805	0.2357	0.407	NA	0	0
Tb927.5.2290	U5 splicing factor U5-200K, putative or BRR2 homologue	RNA.processing	0.167	0.9618	4.0805	0.2357	0.407	NA	0	0
Tb927.6.3810	Possible non-canonical poly(A) polymerase. PAP/OAS1 substrate-binding domain (poly(A) polymerase substrate binding)	RNA.processing	0.167	0.9618	4.0805	0.2357	0.407	NA	0	0
Tb927.3.5620	FACT complex subunit SPT16, involved in pol II trasncription initiation, histone H2A/B dissociation from chromatin	RNA.synthesis	2.167	4.5581	2.8165	1.6184	0.0528	0.0962	0	0
Tb927.4.3810	DNA-directed RNA polymerase II subunit 2, p(RPB2)	RNA.synthesis	0.833	3.1796	3.9597	0.803	0.211	NA	0	0
Tb927.4.5020	RNA polymerase IIA largest subunit (RPB1)	RNA.synthesis	0.5	2.4426	3.9946	0.6115	0.27	NA	0	0
Tb927.10.14810	Homologue of yeast MBF1 - Transcriptional coactivator that bridges the DNA-binding region of Gcn4p and TATA-binding protein Spt15p; suppressor of frameshift mutations. Pedominantly in yeast cytosol. multiprotein binding factor and helix-turn-helix domain. (in UPF1-TAP)	RNA.synthesis	1	2.2178	3.4308	0.6465	0.259	NA	0	0
Tb927.10.13320	DNA-directed RNA polymerases II subunit, putative (RPB5)	RNA.synthesis	0.333	1.8577	4.0377	0.4601	0.323	NA	0	0
Tb927.11.630	RNA polymerase I second largest subunit (RPA134)	RNA.synthesis	0.333	1.8577	4.0377	0.4601	0.323	NA	0	0
Tb927.3.3220	RNA polymerase-associated protein CTR9, putative	RNA.synthesis	0.333	1.8577	4.0377	0.4601	0.323	NA	0	0
Tb11.v5.0723	DNA-directed rna polymerase I largest subunit, putative	RNA.synthesis	0.333	1.8577	4.0377	0.4601	0.323	NA	0	0
Tb927.11.8310	class I transcription factor A, subunit 4 (CITFA-4)	RNA.synthesis	0.167	0.9618	4.0805	0.2357	0.407	NA	0	0
Tb927.10.15170	NRG1, nucleolar regulator of GPEET expression	RNA.synthesis	0.167	0.9618	4.0805	0.2357	0.407	NA	0	0
Tb11.v5.0608	DNA-directed RNA polymerase III largest subunit, putative	RNA.synthesis	0.167	0.9618	4.0805	0.2357	0.407	NA	0	0
Tb927.10.170	pseudouridine synthase, Cbf5p	rRNA.tRNA.process	1.333	3.8577	3.3236	1.1607	0.123	NA	0	0
Tb927.5.4420	nucleolar RNA helicase 2 human, DDX50 Mouse	rRNA.tRNA.process	0.5	2.4426	3.9946	0.6115	0.27	NA	0	0
Tb927.8.1510	ATP-dependent DEAD/H RNA helicase, putative Dbp3, ribosome biogenesis? Cis-spliced	rRNA.tRNA.process	3	2.3219	2.098	1.1068	0.134	0.155	0	0
Tb927.5.2530	Kre33 homologue, required for biogenesis of ribsomal small subunit in yeast	rRNA.tRNA.process	0.333	1.8577	4.0377	0.4601	0.323	NA	0	0
Tb927.5.4270	ATP-dependent DEAD/H RNA helicase, putative Hca4, ribosome biogenesis?	rRNA.tRNA.process	0.167	0.9618	4.0805	0.2357	0.407	NA	0	0
Tb927.10.6290	ATP-dependent DEAD/H RNA helicase, putative Rrp3, ribosome biogenesis?	rRNA.tRNA.process	0.167	0.9618	4.0805	0.2357	0.407	NA	0	0
Tb927.6.2650	Homologue of yeast SGD1, small ribosomal subunit biogenesis. MA3 domain	rRNA.tRNA.process	0.167	0.9618	4.0805	0.2357	0.407	NA	0	0
Tb927.11.5480	N-terminus homologue of human histone mRNA 3' exoribonuclease, C-terminus Homologue of yeast TPT1, tRNA 2'-phosphotransferase involved in last step ot tRNA splicing	rRNA.tRNA.process	0.167	0.9618	4.0805	0.2357	0.407	NA	0	0
Tb927.11.3120	nucleolar GTP-binding protein 1 (NOG1)	rRNA.tRNA.process	0.167	0.9618	4.0805	0.2357	0.407	NA	0	0
Tb927.4.3840	nucleolar protein, putative	rRNA.tRNA.process	0.167	0.9618	4.0805	0.2357	0.407	NA	0	0
Tb927.9.8200	PES1	rRNA.tRNA.process	0.167	0.9618	4.0805	0.2357	0.407	NA	0	0
Tb927.1.1370	rRNA biogenesis protein, putative	rRNA.tRNA.process	0.167	0.9618	4.0805	0.2357	0.407	NA	0	0
Tb927.11.6870	14-3-3 protein	Signalling	2.5	4.7646	2.6851	1.7744	0.038	0.0776	0	0
Tb927.9.5040	cAMP-specific phosphodiesterase (PDEB1)	Signalling	1.333	3.8577	3.3236	1.1607	0.123	NA	0	0
Tb927.11.9530	14-3-3-I protein	Signalling	4	3.4594	2.1953	1.5758	0.0575	0.0974	0	0
Tb927.3.1060	3' end of CARP4, joined to Tb927.3.1040	Signalling	1	3.4426	3.7001	0.9304	0.176	NA	0	0
Tb927.7.5340	CARP3	Signalling	1	3.4426	3.9509	0.8714	0.192	NA	0	0
Tb05.5K5.110	major vault protein, putative	Signalling	0.667	2.8577	3.9728	0.7193	0.236	NA	0	0
Tb927.3.5550	small GTP-binding protein, putative (TbRX1)	Signalling	0.667	2.8577	3.9728	0.7193	0.236	NA	0	0
Tb927.11.6270	inositol-1,4,5-trisphosphate (IP3) 5-phosphatase, putative	Signalling	0.333	1.8577	4.0377	0.4601	0.323	NA	0	0
Tb927.10.7110	Inositol-3-phosphate synthase	Signalling	0.333	1.8577	4.0377	0.4601	0.323	NA	0	0
Tb927.11.3320	ras-like small GTPase, putative (TbGTR)	Signalling	0.333	1.8577	4.0377	0.4601	0.323	NA	0	0
Tb927.3.1840	3-oxo-5-alpha-steroid 4-dehydrogenase, putative	Sterols	1.167	3.665	3.5305	1.0381	0.15	NA	0	0
Tb927.7.5230	lanosterol synthase	Sterols	0.167	0.9618	4.0805	0.2357	0.407	NA	0	0
Tb927.11.10560	eIF4G4	Translation	2.667	4.8577	2.4111	2.0147	0.022	0.0548	0	0
Tb927.7.1670	eIF4E6	Translation	2.333	4.665	2.5213	1.8502	0.0321	0.069	0	0
Tb927.10.4640	eIF3L	Translation	2.333	4.665	2.7535	1.6942	0.0451	0.0906	0	0
Tb927.3.1680	eIF3F	Translation	1.833	4.3171	2.9672	1.455	0.0728	0.108	0	0
Tb927.3.2900	EF-2 alpha, elongation initiation factor 2 alpha subunit,	Translation	1.5	4.0276	3.2029	1.2575	0.104	0.125	0	0
Tb927.10.13280	GCN1 homologue, possibly involved in translation control	Translation	1.5	4.0276	3.1827	1.2655	0.103	0.125	0	0
Tb927.10.8270	eIF3c	Translation	1.333	3.8577	3.0335	1.2717	0.102	NA	0	0
Tb927.9.9290	PABP1	Translation	1.333	3.8577	3.7036	1.0416	0.149	NA	0	0
Tb927.8.5880	eIF1A	Translation	0.833	3.1796	3.9597	0.803	0.211	NA	0	0
Tb927.10.6800	RBG1, associated with translating ribosomes	Translation	0.833	3.1796	3.9597	0.803	0.211	NA	0	0
Tb927.6.4370	eIF3d	Translation	2.833	2.9069	2.4082	1.2071	0.114	0.133	0	0
Tb927.11.13250	eIF-2-gamma	Translation	1.5	2.8959	3.0224	0.9581	0.169	0.189	0	0
Tb927.11.7100	MCT1/TMA20 homologue, similar to N-terminus of eIF2D	Translation	0.667	2.8577	3.9728	0.7193	0.236	NA	0	0
Tb927.4.2740	EF hand protein, conserved, RNAi inc diff?	Translation	0.333	1.8577	4.0377	0.4601	0.323	NA	0	0
Tb927.5.3120	eIF2 beta	Translation	0.333	1.8577	4.0377	0.4601	0.323	NA	0	0
Tb927.8.1170	eIF3H	Translation	0.333	1.8577	4.0377	0.4601	0.323	NA	0	0
Tb927.10.16070	eIF4E2	Translation	0.333	1.8577	4.0377	0.4601	0.323	NA	0	0
Tb927.11.2300	ERF1 eukaryotic peptide chain release factor subunit 1, putative	Translation	0.333	1.8577	4.0377	0.4601	0.323	NA	0	0
Tb927.10.1630	RLI translation termination & ribosome recycling	Translation	0.333	1.8577	4.0377	0.4601	0.323	NA	0	0
Tb927.11.11370	guanine nucleotide-binding protein beta subunit- like protein (TRACK)	Translation	6.667	1.3985	1.5039	0.9299	0.176	0.196	0	0
Tb927.10.14550	DED1-1, ATP-dependent DEAD/H RNA helicase, VASA homologue	Translation	8.5	1.1293	1.4116	0.8	0.212	0.234	0	0
Tb927.9.11050	4E-IP, 4E-interacting protein, putative	Translation	1.5	1	2.9343	0.3408	0.367	0.379	0	0
Tb927.11.9610	eIF3I	Translation	0.167	0.9618	4.0805	0.2357	0.407	NA	0	0
Tb927.10.2770	eIF5	Translation	0.167	0.9618	4.0805	0.2357	0.407	NA	0	0
Tb927.11.740	eIF5A	Translation	0.167	0.9618	4.0805	0.2357	0.407	NA	0	0
Tb927.9.10710	ERF3-related protein (but not ERF3)	Translation	0.167	0.9618	4.0805	0.2357	0.407	NA	0	0
Tb927.6.3870	SGN1	Translation	0.167	0.9618	4.0805	0.2357	0.407	NA	0	0
Tb927.4.1930	EIF3G	Translation	1.5	-0.3219	2.7162	0	0.547	NA	0	0
Tb927.9.5210	glutaminyl-tRNA synthetase, putative (28G16.175)	Translation.tRNA	2	4.4426	2.8884	1.5381	0.062	0.101	0	0
Tb927.4.2310	asparaginyl-tRNA synthetase, putative	Translation.tRNA	1.667	4.1796	3.0649	1.3637	0.0863	0.117	0	0
Tb927.8.1600	lysyl-tRNA synthetase, putative	Translation.tRNA	1.5	4.0276	3.1827	1.2655	0.103	0.125	0	0
Tb927.11.3730	leucyl-tRNA synthetase, putative (LeuRS)	Translation.tRNA	0.833	3.1796	3.9597	0.803	0.211	NA	0	0
Tb927.11.7170	seryl-tRNA synthetase, putative	Translation.tRNA	0.667	2.8577	3.9728	0.7193	0.236	NA	0	0
Tb927.5.1090	threonyl-tRNA synthetase, putative	Translation.tRNA	0.667	2.8577	3.9728	0.7193	0.236	NA	0	0
Tb927.10.12890	bifunctional aminoacyl-tRNA synthetase, putative	Translation.tRNA	0.333	1.8577	4.0377	0.4601	0.323	NA	0	0
Tb927.10.1500	methionyl-tRNA synthetase, putative (MetRS)	Translation.tRNA	0.333	1.8577	4.0377	0.4601	0.323	NA	0	0
Tb927.11.10780	Voltage-dependent anion channel (VDAC), putative	Transporter	0.333	1.8577	4.0377	0.4601	0.323	NA	0	0
Tb927.4.4490	multidrug resistance protein E,p-glycoprotein (MRPE)	Transporter	0.167	0.9618	4.0805	0.2357	0.407	NA	0	0
Tb927.3.800	Vacuolar iron transporter VIT1	Transporter	0.167	0.9618	4.0805	0.2357	0.407	NA	0	0
Tb927.11.7020	proteasome alpha 7 subunit, putative (PSA4)	Ubiquitin.proteasome	1.833	4.3171	2.9672	1.455	0.0728	0.108	0	0
Tb927.11.3390	hypothetical protein, conserved, HECT E3 ligase at C-terminus	Ubiquitin.proteasome	1.5	4.0276	3.2376	1.244	0.107	0.127	0	0
Tb927.3.5520	26S proteasome regulatory non-ATPase subunit (RPN1)	Ubiquitin.proteasome	1.333	3.8577	3.3694	1.1449	0.126	NA	0	0
Tb927.7.2500	proteasome regulatory ATPase subunit 1 (RPT1)	Ubiquitin.proteasome	1.333	3.8577	3.3236	1.1607	0.123	NA	0	0
Tb927.3.4840	ubiquitin hydrolase, putative,cysteine peptidase, Clan CA, family C19, putative	Ubiquitin.proteasome	1	3.4426	3.7001	0.9304	0.176	NA	0	0
Tb927.10.6080	proteasome beta 5 subunit, putative,proteasome beta 5 subunit (PRCE)	Ubiquitin.proteasome	0.833	3.1796	3.9597	0.803	0.211	NA	0	0
Tb927.11.14330	hypothetical protein, conserved, ARM repeat, Zn binding, HECT E3 ligase	Ubiquitin.proteasome	0.667	2.8577	3.9728	0.7193	0.236	NA	0	0
Tb927.10.1550	proteasome regulatory non-ATP-ase subunit 5,)RPN5)	Ubiquitin.proteasome	0.667	2.8577	3.9728	0.7193	0.236	NA	0	0
Tb927.11.16030	proteasome regulatory non-ATP-ase subunit 7 (RPN7)	Ubiquitin.proteasome	0.667	2.8577	3.9728	0.7193	0.236	NA	0	0
Tb927.8.2640	ubiquitin-activating enzyme e1, putative (UBA1)	Ubiquitin.proteasome	2.667	2.8073	2.3023	1.2194	0.111	0.131	0	0
Tb927.9.9670	20S proteasome subunit alpha-6, (putative) (TbPSA6)	Ubiquitin.proteasome	0.5	2.4426	3.9946	0.6115	0.27	NA	0	0
Tb927.8.6330	hypothetical protein, conserved, similar to yeast Doa1p, 7WD repeats,PFU domain binding to Ubiquitin	Ubiquitin.proteasome	0.5	2.4426	3.9946	0.6115	0.27	NA	0	0
Tb927.10.3710	proteasome activator protein PA26	Ubiquitin.proteasome	0.5	2.4426	3.9946	0.6115	0.27	NA	0	0
Tb927.6.1260	proteasome beta-1 subunit, putative (TbPSB1)	Ubiquitin.proteasome	0.5	2.4426	3.9946	0.6115	0.27	NA	0	0
Tb927.11.14430	proteasome regulatory non-ATP-ase subunit (RPN1)	Ubiquitin.proteasome	0.5	2.4426	3.9946	0.6115	0.27	NA	0	0
Tb927.9.11330	proteasome beta 2 subunit, putative	Ubiquitin.proteasome	0.333	1.8577	4.0377	0.4601	0.323	NA	0	0
Tb927.10.4710	proteasome beta 2 subunit, putative,20S proteasome subunit (PSB4)	Ubiquitin.proteasome	0.333	1.8577	4.0377	0.4601	0.323	NA	0	0
Tb927.10.15720	Proteasome regulatory subunit (RPN9)	Ubiquitin.proteasome	0.333	1.8577	4.0377	0.4601	0.323	NA	0	0
Tb927.8.1590	TOM1, HECT ubiquitin-protein ligase involved in mRNA export from nucleus	Ubiquitin.proteasome	0.333	1.8577	4.0377	0.4601	0.323	NA	0	0
Tb927.6.2690	ubiquitin carboxyl-terminal hydrolase, Clan CA cysteine peptidase, family C12, putative	Ubiquitin.proteasome	0.333	1.8577	4.0377	0.4601	0.323	NA	0	0
Tb927.9.14470	ubiquitin carboxyl-terminal hydrolase, Clan CA cysteine peptidase, family C12, putative	Ubiquitin.proteasome	0.333	1.8577	4.0377	0.4601	0.323	NA	0	0
Tb11.v5.0553	ubiquitin hydrolase, putative	Ubiquitin.proteasome	0.333	1.8577	4.0377	0.4601	0.323	NA	0	0
Tb927.6.5110	DDB1	Ubiquitin.proteasome	0.167	0.9618	4.0805	0.2357	0.407	NA	0	0
Tb927.9.6040	E1-like ubiquitin-activating enzyme, putative	Ubiquitin.proteasome	0.167	0.9618	4.0805	0.2357	0.407	NA	0	0
Tb927.2.6050	coatamer beta-prime subunit beta prime COP	Vesicular.transport	2.167	4.5581	2.8101	1.622	0.0524	0.0962	0	0
Tb927.11.6170	protein transport protein Sec31, putative,cytosolic coat protein, putative	Vesicular.transport	2	4.4426	2.8813	1.5419	0.0616	0.101	0	0
Tb927.8.890	Ras-related protein Rab1A	Vesicular.transport	3.833	4.3553	2.2683	1.9201	0.0274	0.0638	0	0
Tb927.6.4500	translocon-associated protein beta	Vesicular.transport	1.667	4.1796	3.0757	1.3589	0.0871	0.117	0	0
Tb927.7.3180	adaptin complex AP1 mu subunit	Vesicular.transport	1.333	3.8577	3.3369	1.1561	0.124	NA	0	0
Tb927.4.450	coatomer alpha subunit, putative (TbCoatomerAlpha)	Vesicular.transport	1.333	3.8577	3.3236	1.1607	0.123	NA	0	0
Tb927.4.1850	SRP68, putative	Vesicular.transport	1.333	3.8577	3.3369	1.1561	0.124	NA	0	0
Tb927.7.4470	translocon-associated protein gamma 4 transmembrane domains	Vesicular.transport	1.167	3.665	3.5305	1.0381	0.15	NA	0	0
Tb927.1.2570	coatomer beta subunit (beta-coP)	Vesicular.transport	1	3.4426	3.9509	0.8714	0.192	NA	0	0
Tb927.6.3500	RME8 endosomal trafficking protein, clathrin-associated	Vesicular.transport	1	3.4426	3.707	0.9287	0.177	NA	0	0
Tb927.1.1560	vesicular-fusion protein nsf, putative,N-ethylmaleimide sensitive factor (NsF)	Vesicular.transport	1	3.4426	3.7001	0.9304	0.176	NA	0	0
Tb11.v5.0859	N-myristoyl transferase, putative	Vesicular.transport	1	3.4426	3.7001	0.9304	0.176	NA	0	0
Tb927.11.6230	pretranslocation protein, alpha subunit, SEC61	Vesicular.transport	2	3.3553	2.5705	1.3053	0.0959	0.125	0	0
Tb927.11.11900	coatomer gamma subunit, (Gamma-COP) COPG	Vesicular.transport	0.833	3.1796	3.9597	0.803	0.211	NA	0	0
Tb927.11.15230	TbERP1	Vesicular.transport	0.833	3.1796	3.9597	0.803	0.211	NA	0	0
Tb927.10.12960	ras-related protein rab-5,small GTPase, putative (RAB5A)	Vesicular.transport	0.667	2.8577	3.9728	0.7193	0.236	NA	0	0
Tb927.4.760	adaptin complex AP1 gamma subunit	Vesicular.transport	0.5	2.4426	3.9946	0.6115	0.27	NA	0	0
Tb927.3.4000	Adaptin complex AP1 sigma subunit	Vesicular.transport	0.5	2.4426	3.9946	0.6115	0.27	NA	0	0
Tb927.3.5420	protein transport protein Sec24	Vesicular.transport	0.5	2.4426	3.9946	0.6115	0.27	NA	0	0
Tb927.11.15240	Ras-related protein RAB2B, putative	Vesicular.transport	0.5	2.4426	3.9946	0.6115	0.27	NA	0	0
Tb927.8.4770	small GTP-binding protein Rab18	Vesicular.transport	0.5	2.4426	3.9946	0.6115	0.27	NA	0	0
Tb927.10.6640	TbERP8	Vesicular.transport	0.5	2.4426	3.9946	0.6115	0.27	NA	0	0
Tb927.7.2190	Translocon-associated protein alpha subunit	Vesicular.transport	0.5	2.4426	3.9946	0.6115	0.27	NA	0	0
Tb927.4.5010	calreticulin, putative	Vesicular.transport	0.833	1.8959	3.6898	0.5138	0.304	NA	0	0
Tb927.10.6230	hypothetical protein, conserved,MORN repeat containing protein	Vesicular.transport	0.333	1.8577	4.0377	0.4601	0.323	NA	0	0
Tb927.11.7510	luminal binding protein 1 (BiP), putative	Vesicular.transport	0.333	1.8577	4.0377	0.4601	0.323	NA	0	0
Tb927.8.3660	protein transport protein SEC23	Vesicular.transport	0.333	1.8577	4.0377	0.4601	0.323	NA	0	0
Tb927.3.1210	protein transport protein Sec24	Vesicular.transport	0.333	1.8577	4.0377	0.4601	0.323	NA	0	0
Tb927.8.4610	Ras-related protein RabX1	Vesicular.transport	0.333	1.8577	4.0377	0.4601	0.323	NA	0	0
Tb927.9.10010	Sec63 homologue, chaperone protein DNAj	Vesicular.transport	0.333	1.8577	4.0377	0.4601	0.323	NA	0	0
Tb927.10.15520	signal recognition particle protein, putative	Vesicular.transport	0.333	1.8577	4.0377	0.4601	0.323	NA	0	0
Tb927.11.9890	signal recognition particle receptor alpha subunit, putative	Vesicular.transport	0.333	1.8577	4.0377	0.4601	0.323	NA	0	0
Tb927.8.5250	coatomer delta subunit, ,delta-COP	Vesicular.transport	0.167	0.9618	4.0805	0.2357	0.407	NA	0	0
Tb927.11.3470	endosomal integral membrane protein, putative	Vesicular.transport	0.167	0.9618	4.0805	0.2357	0.407	NA	0	0
Tb927.4.1090	endosomal integral membrane protein, putative	Vesicular.transport	0.167	0.9618	4.0805	0.2357	0.407	NA	0	0
Tb927.11.10690	hypothetical protein, conserved	Vesicular.transport	0.167	0.9618	4.0805	0.2357	0.407	NA	0	0
Tb927.4.3380	MYO1 myosin IB heavy chain, in Tc vacuolar proteome and clathrin-associated	Vesicular.transport	0.167	0.9618	4.0805	0.2357	0.407	NA	0	0
Tb927.3.960	protein transport protein Sec61 gamma subunit, putative	Vesicular.transport	0.167	0.9618	4.0805	0.2357	0.407	NA	0	0
Tb927.3.3850	Sec23-binding domain of Sec16, matches yeast proline-rich domain proteins associated with actin organisation	Vesicular.transport	0.167	0.9618	4.0805	0.2357	0.407	NA	0	0
Tb927.9.10640	synaptojanin (N-terminal domain), putative	Vesicular.transport	0.167	0.9618	4.0805	0.2357	0.407	NA	0	0
Tb927.8.5030	trafficking protein particle complex subunit 3, (TRAPP) component, Bet3	Vesicular.transport	0.167	0.9618	4.0805	0.2357	0.407	NA	0	0
Tb927.10.5770	valosin-containing protein homolog,Transitional endoplasmic reticulum ATPase, putative (VCP)	Vesicular.transport	0.167	0.9618	4.0805	0.2357	0.407	NA	0	0
Tb10.v4.0168	VSG pseudogene	VSG	0.667	2.8577	3.9728	0.7193	0.236	NA	0	0
Tb927.9.400	VSG pseudogene	VSG	0.333	1.8577	4.0377	0.4601	0.323	NA	0	0
Tb927.5.4950	variant surface glycoprotein (VSG, atypical), putative	VSG	0.167	0.9618	4.0805	0.2357	0.407	NA	0	0
Tb927.6.5480	VSG pseudogene,variant surface glycoprotein, degenerate	VSG	0.167	0.9618	4.0805	0.2357	0.407	NA	0	0
Tb927.10.12940	predicted zinc finger protein	Zinc.finger	0.167	0.9618	4.0805	0.2357	0.407	NA	0	0
Tb927.6.3640	zinc finger of C3HC4-type, RING/B-box zinc finger, putative	Zinc.finger	0.167	0.9618	4.0805	0.2357	0.407	NA	0	0
Tb927.10.12820	Cysteine proteinase domains by interpro but not NCBI	ZUnknown	2.667	4.8577	2.6343	1.844	0.0326	0.069	0	0
Tb927.7.4700	WD domain, G-beta repeat, putative	ZUnknown	2.667	4.8577	2.6312	1.8462	0.0324	0.069	0	0
Tb927.5.3450	eukaryotic translation initiation factor eIF2A, putative	ZUnknown	2.167	4.5581	2.5465	1.7899	0.0367	0.0757	0	0
Tb927.11.4910	predicted ankyrin repeat family protein	ZUnknown	2	4.4426	2.8986	1.5327	0.0627	0.101	0	0
Tb927.7.3040	hypothetical protein, conserved	ZUnknown	1.833	4.3171	2.9804	1.4485	0.0737	0.108	0	0
Tb927.11.2540	hypothetical protein, conserved	ZUnknown	1.667	4.1796	3.0649	1.3637	0.0863	0.117	0	0
Tb927.9.7690	hypothetical protein, conserved, nucelotidyltransferase and poly(A) polymerase substrate binding domains	ZUnknown	1.5	4.0276	3.2029	1.2575	0.104	0.125	0	0
Tb927.7.4460	von Willebrand factor type A domain containing protein, putative	ZUnknown	1.5	4.0276	3.1879	1.2634	0.103	0.125	0	0
Tb927.7.1330	hypothetical protein, conserved	ZUnknown	1.5	4.0276	3.1827	1.2655	0.103	0.125	0	0
Tb927.8.5760	Ankyrin repeats (many copies)/Alpha/beta hydrolase family, putative	ZUnknown	1.167	3.665	3.5305	1.0381	0.15	NA	0	0
Tb927.9.1750	Fibronectin type III domain containing protein, putative	ZUnknown	1.167	3.665	3.5305	1.0381	0.15	NA	0	0
Tb927.5.2000	hypothetical protein copurifies with MKT1	ZUnknown	1.167	3.665	3.4998	1.0472	0.148	NA	0	0
Tb927.10.8830	hypothetical protein, conserved	ZUnknown	1.167	3.665	3.1826	1.1516	0.125	NA	0	0
Tb927.9.15070	hypothetical protein, conserved	ZUnknown	1.167	3.665	3.4998	1.0472	0.148	NA	0	0
Tb927.10.15360	hypothetical protein, conserved, weak DEAD domain/P-loop hydrolase	ZUnknown	1.167	3.665	3.163	1.1587	0.123	NA	0	0
Tb927.5.2320	Mak10 subunit, NatC N(alpha)-terminal acetyltransferase, putative	ZUnknown	1.167	3.665	3.4895	1.0503	0.147	NA	0	0
Tb927.6.4320	Protein of unknown function (DUF2817), putative	ZUnknown	1.167	3.665	3.4895	1.0503	0.147	NA	0	0
Tb927.7.4500	PX domain containing protein, putative	ZUnknown	1.167	3.665	3.4895	1.0503	0.147	NA	0	0
Tb927.4.590	PQQ-like domain/Protein of unknown function (DUF1620), putative	ZUnknown	1	3.4426	3.7001	0.9304	0.176	NA	0	0
Tb927.11.4360	Protein of unknown function (DUF1014), putative	ZUnknown	1	3.4426	3.9509	0.8714	0.192	NA	0	0
Tb927.10.2190	Protein of unknown function (DUF667), putative	ZUnknown	1	3.4426	3.735	0.9217	0.178	NA	0	0
Tb927.7.3550	hypothetical protein, conserved, no yeast or human match	ZUnknown	3.667	3.3219	2.0024	1.659	0.0486	0.0959	0	0
Tb927.1.3260	hypothetical protein, conserved	ZUnknown	0.833	3.1796	3.9597	0.803	0.211	NA	0	0
Tb927.7.900	hypothetical protein, conserved	ZUnknown	0.833	3.1796	3.9597	0.803	0.211	NA	0	0
Tb927.5.2250	META domain/Domain of unknown function (DUF1935), putative	ZUnknown	0.833	3.1796	3.9597	0.803	0.211	NA	0	0
Tb927.3.4040	Ankyrin repeats (3 copies), putative	ZUnknown	0.667	2.8577	3.9728	0.7193	0.236	NA	0	0
Tb927.1.1420	conserved protein, unknown function	ZUnknown	0.667	2.8577	3.9728	0.7193	0.236	NA	0	0
Tb927.10.15330	CYTH domain containing protein, putative	ZUnknown	0.667	2.8577	3.9728	0.7193	0.236	NA	0	0
Tb927.11.3770	Dpy-30 motif containing protein, putative	ZUnknown	0.667	2.8577	3.9728	0.7193	0.236	NA	0	0
Tb927.9.6320	hypothetical protein, conserved	ZUnknown	0.667	2.8577	3.9728	0.7193	0.236	NA	0	0
Tb927.11.1420	hypothetical protein, conserved	ZUnknown	0.667	2.8577	3.9728	0.7193	0.236	NA	0	0
Tb927.9.2900	hypothetical protein, conserved	ZUnknown	0.667	2.8577	3.9728	0.7193	0.236	NA	0	0
Tb927.5.1930	signal peptidase subunit, putative	ZUnknown	0.667	2.8577	3.9728	0.7193	0.236	NA	0	0
Tb927.11.8060	SNARE associated Golgi protein, putative	ZUnknown	0.667	2.8577	3.9728	0.7193	0.236	NA	0	0
Tb927.5.3250	hypothetical protein, conserved, no clear yeast or human matches	ZUnknown	0.667	2.8577	3.9728	0.7193	0.236	NA	0	0
Tb927.9.1700	btb/poz domain containing protein, putative	ZUnknown	0.5	2.4426	3.9946	0.6115	0.27	NA	0	0
Tb927.2.5810	Holliday-junction resolvase-like of SPT6/SH2 domain containing protein, putative	ZUnknown	0.5	2.4426	3.9946	0.6115	0.27	NA	0	0
Tb927.10.4260	hypothetical protein, conserved	ZUnknown	0.5	2.4426	3.9946	0.6115	0.27	NA	0	0
Tb927.11.6600	hypothetical protein, conserved	ZUnknown	0.5	2.4426	3.9946	0.6115	0.27	NA	0	0
Tb927.11.6610	hypothetical protein, conserved	ZUnknown	0.5	2.4426	3.9946	0.6115	0.27	NA	0	0
Tb927.11.7550	hypothetical protein, conserved	ZUnknown	0.5	2.4426	3.9946	0.6115	0.27	NA	0	0
Tb927.5.1690	hypothetical protein, conserved	ZUnknown	0.5	2.4426	3.9946	0.6115	0.27	NA	0	0
Tb927.8.1950	hypothetical protein, conserved	ZUnknown	0.5	2.4426	3.9946	0.6115	0.27	NA	0	0
Tb927.8.3840	hypothetical protein, conserved	ZUnknown	0.5	2.4426	3.9946	0.6115	0.27	NA	0	0
Tb927.11.15870	hypothetical protein, conserved, no human or yeast homologue	ZUnknown	0.5	2.4426	3.9946	0.6115	0.27	NA	0	0
Tb927.4.3350	N2227-like protein, putative	ZUnknown	0.5	2.4426	3.9946	0.6115	0.27	NA	0	0
Tb927.6.5080	Protein of unknown function (DUF3808), putative	ZUnknown	0.5	2.4426	3.9946	0.6115	0.27	NA	0	0
Tb927.11.4860	Ring finger domain containing protein, putative	ZUnknown	0.5	2.4426	3.9946	0.6115	0.27	NA	0	0
Tb927.8.1840	Sec7 domain containing protein, putative	ZUnknown	0.5	2.4426	3.9946	0.6115	0.27	NA	0	0
Tb927.8.2200	terbinafine resistance locus protein (yip1), putative	ZUnknown	0.5	2.4426	3.9946	0.6115	0.27	NA	0	0
Tb11.v5.0154	WD domain, G-beta repeat, putative	ZUnknown	0.5	2.4426	3.9946	0.6115	0.27	NA	0	0
Tb927.9.1880	WD domain, G-beta repeat, putative	ZUnknown	0.5	2.4426	3.9946	0.6115	0.27	NA	0	0
Tb927.10.13710	Activator of Hsp90 ATPase, N-terminal/Activator of Hsp90 ATPase homolog 1-like protein, putative	ZUnknown	0.333	1.8577	4.0377	0.4601	0.323	NA	0	0
Tb927.11.12840	Domain of unknown function (DUF4486), putative	ZUnknown	0.333	1.8577	4.0377	0.4601	0.323	NA	0	0
Tb927.9.11480	Enriched in surface-labeled proteome protein 9 (ESP9)	ZUnknown	0.333	1.8577	4.0377	0.4601	0.323	NA	0	0
Tb927.10.8640	Galactose oxidase, central domain containing protein, putative	ZUnknown	0.333	1.8577	4.0377	0.4601	0.323	NA	0	0
Tb927.5.3900	Galactose oxidase, central domain/Domain of unknown function (DUF4110), putative	ZUnknown	0.333	1.8577	4.0377	0.4601	0.323	NA	0	0
Tb927.9.7110	GRAM domain containing protein, putative	ZUnknown	0.333	1.8577	4.0377	0.4601	0.323	NA	0	0
Tb927.7.4990	hypothetical protein, conserved	ZUnknown	0.333	1.8577	4.0377	0.4601	0.323	NA	0	0
Tb927.10.4200	hypothetical protein, conserved	ZUnknown	0.333	1.8577	4.0377	0.4601	0.323	NA	0	0
Tb927.10.7920	hypothetical protein, conserved	ZUnknown	0.333	1.8577	4.0377	0.4601	0.323	NA	0	0
Tb927.11.13670	hypothetical protein, conserved	ZUnknown	0.333	1.8577	4.0377	0.4601	0.323	NA	0	0
Tb927.11.9440	hypothetical protein, conserved	ZUnknown	0.333	1.8577	4.0377	0.4601	0.323	NA	0	0
Tb927.3.1670	hypothetical protein, conserved	ZUnknown	0.333	1.8577	4.0377	0.4601	0.323	NA	0	0
Tb927.3.1740	hypothetical protein, conserved	ZUnknown	0.333	1.8577	4.0377	0.4601	0.323	NA	0	0
Tb927.4.2530	hypothetical protein, conserved	ZUnknown	0.333	1.8577	4.0377	0.4601	0.323	NA	0	0
Tb927.8.7470	hypothetical protein, conserved	ZUnknown	0.333	1.8577	4.0377	0.4601	0.323	NA	0	0
Tb927.5.1680	hypothetical protein, conserved	ZUnknown	0.333	1.8577	4.0377	0.4601	0.323	NA	0	0
Tb927.6.620	hypothetical protein, conserved	ZUnknown	0.333	1.8577	4.0377	0.4601	0.323	NA	0	0
Tb927.7.3970	hypothetical protein, conserved	ZUnknown	0.333	1.8577	4.0377	0.4601	0.323	NA	0	0
Tb927.7.6610	hypothetical protein, conserved	ZUnknown	0.333	1.8577	4.0377	0.4601	0.323	NA	0	0
Tb927.8.1540	hypothetical protein, conserved	ZUnknown	0.333	1.8577	4.0377	0.4601	0.323	NA	0	0
Tb927.8.2120	hypothetical protein, conserved	ZUnknown	0.333	1.8577	4.0377	0.4601	0.323	NA	0	0
Tb927.9.2590	hypothetical protein, conserved	ZUnknown	0.333	1.8577	4.0377	0.4601	0.323	NA	0	0
Tb927.9.6380	hypothetical protein, conserved	ZUnknown	0.333	1.8577	4.0377	0.4601	0.323	NA	0	0
Tb927.10.9890	hypothetical protein, conserved, no domains	ZUnknown	0.333	1.8577	4.0377	0.4601	0.323	NA	0	0
Tb927.10.13790	hypothetical protein, conserved, no human or yeast homologue	ZUnknown	0.333	1.8577	4.0377	0.4601	0.323	NA	0	0
Tb927.10.4760	Integral membrane protein DUF106, putative	ZUnknown	0.333	1.8577	4.0377	0.4601	0.323	NA	0	0
Tb927.10.9360	L-2-hydroxyglutarate dehydrogenase, mitochondrial, putative	ZUnknown	0.333	1.8577	4.0377	0.4601	0.323	NA	0	0
Tb927.6.1980	LMBR1-like membrane protein, putative	ZUnknown	0.333	1.8577	4.0377	0.4601	0.323	NA	0	0
Tb927.3.2420	Microsomal signal peptidase 12 kDa subunit (SPC12), putative	ZUnknown	0.333	1.8577	4.0377	0.4601	0.323	NA	0	0
Tb927.7.6910	MORN repeat-containing protein	ZUnknown	0.333	1.8577	4.0377	0.4601	0.323	NA	0	0
Tb927.10.13180	Nrap protein, putative	ZUnknown	0.333	1.8577	4.0377	0.4601	0.323	NA	0	0
Tb927.10.3640	nuclear transmembrane protein, putative (NP)	ZUnknown	0.333	1.8577	4.0377	0.4601	0.323	NA	0	0
Tb927.4.2760	Protein of unknown function (DUF3808), putative	ZUnknown	0.333	1.8577	4.0377	0.4601	0.323	NA	0	0
Tb927.10.14510	root hair defective 3 GTP-binding protein (RHD3), putative	ZUnknown	0.333	1.8577	4.0377	0.4601	0.323	NA	0	0
Tb927.5.2770	SET domain containing protein, putative	ZUnknown	0.333	1.8577	4.0377	0.4601	0.323	NA	0	0
Tb927.10.2380	Tetratricopeptide repeat, putative	ZUnknown	0.333	1.8577	4.0377	0.4601	0.323	NA	0	0
Tb927.11.16890	Tetratricopeptide-like helical domain containing protein (FLAM7)	ZUnknown	0.333	1.8577	4.0377	0.4601	0.323	NA	0	0
Tb927.7.4520	Thioredoxin-like, putative	ZUnknown	0.333	1.8577	4.0377	0.4601	0.323	NA	0	0
Tb927.9.9630	TPR repeat/Tetratricopeptide repeat, putative	ZUnknown	0.333	1.8577	4.0377	0.4601	0.323	NA	0	0
Tb927.4.380	WD domain, G-beta repeat, putative	ZUnknown	0.333	1.8577	4.0377	0.4601	0.323	NA	0	0
Tb11.v5.0642	hypothetical protein, conserved	ZUnknown	0.333	1.8577	4.0377	0.4601	0.323	NA	0	0
Tb927.10.13800	hypothetical protein, conserved, no yeast or human match	ZUnknown	5.333	1.8365	1.5082	1.2177	0.112	0.131	0	0
Tb11.v5.0394	hypothetical protein, conserved	ZUnknown	5.333	1.8365	1.8318	1.0025	0.158	0.179	0	0
Tb927.10.8780	AAA domain containing protein, putative	ZUnknown	0.167	0.9618	4.0805	0.2357	0.407	NA	0	0
Tb927.11.9080	AARP2CN (NUC121) domain/Protein of unknown function (DUF663), putative	ZUnknown	0.167	0.9618	4.0805	0.2357	0.407	NA	0	0
Tb927.3.880	Ankyrin repeats (3 copies), putative	ZUnknown	0.167	0.9618	4.0805	0.2357	0.407	NA	0	0
Tb927.11.14210	conserved protein	ZUnknown	0.167	0.9618	4.0805	0.2357	0.407	NA	0	0
Tb927.11.15970	Guanine nucleotide exchange factor in Golgi transport N-terminal/Sec7 domain containing protein, putative	ZUnknown	0.167	0.9618	4.0805	0.2357	0.407	NA	0	0
Tb927.9.6530	hypothetical protein	ZUnknown	0.167	0.9618	4.0805	0.2357	0.407	NA	0	0
Tb927.10.13450	hypothetical protein, conserved	ZUnknown	0.167	0.9618	4.0805	0.2357	0.407	NA	0	0
Tb927.10.14030	hypothetical protein, conserved	ZUnknown	0.167	0.9618	4.0805	0.2357	0.407	NA	0	0
Tb927.10.14220	hypothetical protein, conserved	ZUnknown	0.167	0.9618	4.0805	0.2357	0.407	NA	0	0
Tb927.10.5790	hypothetical protein, conserved	ZUnknown	0.167	0.9618	4.0805	0.2357	0.407	NA	0	0
Tb927.10.8410	hypothetical protein, conserved	ZUnknown	0.167	0.9618	4.0805	0.2357	0.407	NA	0	0
Tb927.11.16670	hypothetical protein, conserved	ZUnknown	0.167	0.9618	4.0805	0.2357	0.407	NA	0	0
Tb927.11.16800	hypothetical protein, conserved	ZUnknown	0.167	0.9618	4.0805	0.2357	0.407	NA	0	0
Tb927.11.2860	hypothetical protein, conserved	ZUnknown	0.167	0.9618	4.0805	0.2357	0.407	NA	0	0
Tb927.11.5590	hypothetical protein, conserved	ZUnknown	0.167	0.9618	4.0805	0.2357	0.407	NA	0	0
Tb927.11.7520	hypothetical protein, conserved	ZUnknown	0.167	0.9618	4.0805	0.2357	0.407	NA	0	0
Tb927.11.810	hypothetical protein, conserved	ZUnknown	0.167	0.9618	4.0805	0.2357	0.407	NA	0	0
Tb927.11.8270	hypothetical protein, conserved	ZUnknown	0.167	0.9618	4.0805	0.2357	0.407	NA	0	0
Tb927.2.5820	hypothetical protein, conserved	ZUnknown	0.167	0.9618	4.0805	0.2357	0.407	NA	0	0
Tb927.3.760	hypothetical protein, conserved	ZUnknown	0.167	0.9618	4.0805	0.2357	0.407	NA	0	0
Tb927.4.4060	hypothetical protein, conserved	ZUnknown	0.167	0.9618	4.0805	0.2357	0.407	NA	0	0
Tb927.8.6940	hypothetical protein, conserved	ZUnknown	0.167	0.9618	4.0805	0.2357	0.407	NA	0	0
Tb927.4.860	hypothetical protein, conserved	ZUnknown	0.167	0.9618	4.0805	0.2357	0.407	NA	0	0
Tb927.6.3770	hypothetical protein, conserved	ZUnknown	0.167	0.9618	4.0805	0.2357	0.407	NA	0	0
Tb927.6.630	hypothetical protein, conserved	ZUnknown	0.167	0.9618	4.0805	0.2357	0.407	NA	0	0
Tb927.7.1310	hypothetical protein, conserved	ZUnknown	0.167	0.9618	4.0805	0.2357	0.407	NA	0	0
Tb927.7.4880	hypothetical protein, conserved	ZUnknown	0.167	0.9618	4.0805	0.2357	0.407	NA	0	0
Tb927.7.5320	hypothetical protein, conserved	ZUnknown	0.167	0.9618	4.0805	0.2357	0.407	NA	0	0
Tb927.7.7050	hypothetical protein, conserved	ZUnknown	0.167	0.9618	4.0805	0.2357	0.407	NA	0	0
Tb927.7.760	hypothetical protein, conserved	ZUnknown	0.167	0.9618	4.0805	0.2357	0.407	NA	0	0
Tb927.8.4270	hypothetical protein, conserved	ZUnknown	0.167	0.9618	4.0805	0.2357	0.407	NA	0	0
Tb927.9.3770	hypothetical protein, conserved	ZUnknown	0.167	0.9618	4.0805	0.2357	0.407	NA	0	0
Tb927.9.9810	hypothetical protein, conserved	ZUnknown	0.167	0.9618	4.0805	0.2357	0.407	NA	0	0
Tb927.11.6420	hypothetical protein, conserved, ARM repeats	ZUnknown	0.167	0.9618	4.0805	0.2357	0.407	NA	0	0
Tb927.11.4030	hypothetical protein, conserved, no clear yeast or human matches	ZUnknown	0.167	0.9618	4.0805	0.2357	0.407	NA	0	0
Tb927.11.10260	hypothetical protein, conserved, no known domains	ZUnknown	0.167	0.9618	4.0805	0.2357	0.407	NA	0	0
Tb927.10.1970	hypothetical protein, conserved, RNI, TPR, CHAT domains (caspase associated with TPRs)	ZUnknown	0.167	0.9618	4.0805	0.2357	0.407	NA	0	0
Tb927.3.1010	hypothetical protein, conserved, Trypanosoma-specific	ZUnknown	0.167	0.9618	4.0805	0.2357	0.407	NA	0	0
Tb927.5.2620	hypothetical protein, conserved, ubiquitin-like C-terminus, no yeast or human match	ZUnknown	0.167	0.9618	4.0805	0.2357	0.407	NA	0	0
Tb927.3.2210	KIF-1 binding protein C terminal, putative	ZUnknown	0.167	0.9618	4.0805	0.2357	0.407	NA	0	0
Tb927.10.3350	major facilitator superfamily, putative	ZUnknown	0.167	0.9618	4.0805	0.2357	0.407	NA	0	0
Tb927.4.4670	MYND finger, putative	ZUnknown	0.167	0.9618	4.0805	0.2357	0.407	NA	0	0
Tb927.11.10480	PQQ-like domain/WD domain, G-beta repeat/Utp21 specific WD40 associated putative domain containing protein, putative	ZUnknown	0.167	0.9618	4.0805	0.2357	0.407	NA	0	0
Tb927.11.9880	Protein of unknown function (DUF2009), putative	ZUnknown	0.167	0.9618	4.0805	0.2357	0.407	NA	0	0
Tb927.10.8330	S. cerevisiae PSP1 homologue, putative	ZUnknown	0.167	0.9618	4.0805	0.2357	0.407	NA	0	0
Tb927.5.860	Selenoprotein T, putative (SelT)	ZUnknown	0.167	0.9618	4.0805	0.2357	0.407	NA	0	0
Tb927.10.8060	SET domain containing protein, putative	ZUnknown	0.167	0.9618	4.0805	0.2357	0.407	NA	0	0
Tb927.8.7420	TerD domain containing protein, putative	ZUnknown	0.167	0.9618	4.0805	0.2357	0.407	NA	0	0
Tb927.10.5810	The ARF-like 2 binding protein BART, putative	ZUnknown	0.167	0.9618	4.0805	0.2357	0.407	NA	0	0
Tb927.10.12130	Ubiquitin family, putative	ZUnknown	0.167	0.9618	4.0805	0.2357	0.407	NA	0	0
Tb927.8.1980	UTP15 C terminal, putative	ZUnknown	0.167	0.9618	4.0805	0.2357	0.407	NA	0	0
Tb927.8.820	VID27 cytoplasmic protein, putative	ZUnknown	0.167	0.9618	4.0805	0.2357	0.407	NA	0	0
Tb927.5.3260	WD domain, G-beta repeat, putative	ZUnknown	0.167	0.9618	4.0805	0.2357	0.407	NA	0	0
Tb927.7.4220	WD domain, G-beta repeat/Dip2/Utp12 Family, putative	ZUnknown	0.167	0.9618	4.0805	0.2357	0.407	NA	0	0
Tb927.8.5290	WW domain containing protein, putative	ZUnknown	0.167	0.9618	4.0805	0.2357	0.407	NA	0	0
Tb11.v5.0887	hypothetical protein, conserved	ZUnknown	0.167	0.9618	4.0805	0.2357	0.407	NA	0	0
Tb11.v5.0892	hypothetical protein, conserved	ZUnknown	0.167	0.9618	4.0805	0.2357	0.407	NA	0	0
Tb927.3.1200	hypothetical protein, conserved	ZUnknown	0.167	0.9618	4.0805	0.2357	0.407	NA	0	0
Tb927.11.3970	hypothetical protein, conserved, copurifies with U2AF35, CCCH zinc finger PS50103, resembles PAT1 E=0.033	ZUnknown	0.5	0.8959	4.0377	0.2219	0.412	NA	0	0
Tb927.6.2710	hypothetical protein, conserved	ZUnknown	0.5	-0.8959	4.0377	0	0.588	NA	0	0
Tb927.8.5170	hypothetical protein, conserved	ZUnknown	0.5	-0.8959	4.0377	0	0.588	NA	0	0
Tb927.3.5190	hypothetical protein, conserved	ZUnknown	0.167	-0.9618	4.0805	0	0.593	NA	0	0
Tb927.5.1220	hypothetical protein, conserved	ZUnknown	0.167	-0.9618	4.0805	0	0.593	NA	0	0
Tb927.7.3850	hypothetical protein, conserved	ZUnknown	0.167	-0.9618	4.0805	0	0.593	NA	0	0
Tb927.8.6570	hypothetical protein, conserved	ZUnknown	0.167	-0.9618	4.0805	0	0.593	NA	0	0
Tb927.10.1310	Domain of unknown function (DUF4042), putative	ZUnknown	2.333	-1.8744	2.8198	0	0.747	NA	0	0
Tb927.9.8820	hypothetical protein, conserved, no yeast or human match	ZUnknown	0.5	-2.4427	3.9946	0	0.73	NA	0	0
Tb11.v5020	#N/A	#N/A	0.5	2.4426	3.9946	0.6115	0.27	NA	0	0

## Sheet: 5. Raw data
Possible VSG or TUB specificity	Protein IDs	Majority protein IDs	GeneID	Annotation	Category	>1peptide 3x TUB	Maximum peptides TUB	>1peptides 3x VSG	>0peptides 3x VSG	Peptide counts (all)	Peptide counts (razor+unique)	Peptide counts (unique)	Number of proteins	Peptides	Razor + unique peptides	Unique peptides	Peptides TUB1	Peptides TUB2	Peptides TUB3	Peptides VSG1	Peptides VSG2	Peptides VSG3	Razor + unique peptides TUB1	Razor + unique peptides TUB2	Razor + unique peptides TUB3	Razor + unique peptides VSG1	Razor + unique peptides VSG2	Razor + unique peptides VSG3	Unique peptides TUB1	Unique peptides TUB2	Unique peptides TUB3	Unique peptides VSG1	Unique peptides VSG2	Unique peptides VSG3	Sequence coverage [%]	Unique + razor sequence coverage [%]	Unique sequence coverage [%]	Mol. weight [kDa]	Sequence length	Sequence lengths	Q-value	Score	Sequence coverage TUB1 [%]	Sequence coverage TUB2 [%]	Sequence coverage TUB3 [%]	Sequence coverage VSG1 [%]	Sequence coverage VSG2 [%]	Sequence coverage VSG3 [%]	Intensity
	Tb927.10.6060:mRNA-p1;Tb11.v5.0199.1-p1	Tb927.10.6060:mRNA-p1;Tb11.v5.0199.1-p1	Tb927.10.6060	UMSBP2 Telomere-binding	DNA	1	11	1	1	15;15	15;15	14;14	2	15	15	14	7	11	11	7	11	11	7	11	11	7	11	11	6	10	10	6	10	10	97.2	97.2	97.2	21.836	213	213;213	0	285.27	70	77.5	83.6	63.8	80.8	82.2	41800000000
+	Tb927.3.3270:mRNA-p1	Tb927.3.3270:mRNA-p1	Tb927.3.3270	ATP-dependent phosphofructokinase (TbPFK)	Glucose.glycerol	1	16	1	1	51	51	51	1	51	51	51	16	5	7	19	43	37	16	5	7	19	43	37	16	5	7	19	43	37	88.3	88.3	88.3	53.517	487	487	0	323.31	40.5	15.8	18.5	45	87.7	71.9	35600000000
	Tb927.10.14140:mRNA-p1;Tb11.v5.0605.1-p1	Tb927.10.14140:mRNA-p1;Tb11.v5.0605.1-p1	Tb927.10.14140	pyruvate kinase 1 (PYK1)	Glucose.glycerol	1	7	1	1	34;30	34;30	34;30	2	34	34	34	5	7	7	7	27	24	5	7	7	7	27	24	5	7	7	7	27	24	86.2	86.2	86.2	54.423	499	499;458	0	323.31	15	22	24.6	22	75.4	70.5	20100000000
	Tb927.10.6070:mRNA-p1	Tb927.10.6070:mRNA-p1	Tb927.10.6070	UMSBP1	Mito.DNA	1	9	1	1	11	10	10	1	11	10	10	8	8	9	7	8	10	7	7	8	6	7	9	7	7	8	6	7	9	74.3	74.3	74.3	14.566	140	140	0	183.6	60.7	74.3	67.9	54.3	65	74.3	34400000000
+	Tb927.9.6070:mRNA-p1;Tb927.10.11540:mRNA-p1	Tb927.9.6070:mRNA-p1;Tb927.10.11540:mRNA-p1	Tb927.9.6070	40S ribosomal protein S3	Ribosome	1	4	1	1	22;22	22;22	22;22	2	22	22	22	3	4	4	9	19	13	3	4	4	9	19	13	3	4	4	9	19	13	78	78	78	24.216	214	214;214	0	179.2	16.8	26.2	21	35.5	78	58.9	14900000000
	Tb927.10.5370:mRNA-p1;Tb927.10.5360:mRNA-p1	Tb927.10.5370:mRNA-p1;Tb927.10.5360:mRNA-p1	Tb927.10.5370	40S ribosomal protein S10	Ribosome	1	5	1	1	14;14	14;14	14;14	2	14	14	14	3	5	3	4	13	6	3	5	3	4	13	6	3	5	3	4	13	6	64	64	64	19.285	172	172;172	0	144.28	25	39	20.9	27.3	58.1	41.3	6400000000
	Tb927.6.4980:mRNA-p1;Tb927.11.7705:mRNA-p1;Tb11.0390:mRNA-p1;Tb11.0290:mRNA-p1	Tb927.6.4980:mRNA-p1;Tb927.11.7705:mRNA-p1;Tb11.0390:mRNA-p1;Tb11.0290:mRNA-p1	Tb927.6.4980	40S ribosomal protein S14	Ribosome	1	4	1	1	10;10;10;10	10;10;10;10	10;10;10;10	4	10	10	10	3	4	3	3	8	7	3	4	3	3	8	7	3	4	3	3	8	7	49.3	49.3	49.3	15.513	144	144;144;144;144	0	82.309	19.4	26.4	18.8	19.4	49.3	42.4	3790000000
+	Tb927.11.1980:mRNA-p1	Tb927.11.1980:mRNA-p1	Tb927.11.1980	ZC3H41	RNA.binding	1	13	1	1	41	41	41	1	41	41	41	9	13	4	16	34	25	9	13	4	16	34	25	9	13	4	16	34	25	65.2	65.2	65.2	58.459	517	517	0	323.31	20.3	26.3	8.7	30.8	62.9	47.2	29800000000
	Tb927.9.8740:mRNA-p1	Tb927.9.8740:mRNA-p1	Tb927.9.8740	DRBD3 (PTB1)	RNA.binding	1	9	1	1	18	18	18	1	18	18	18	5	8	9	5	16	11	5	8	9	5	16	11	5	8	9	5	16	11	44.3	44.3	44.3	36.984	327	327	0	323.31	17.7	22.9	23.2	17.1	41.9	33.3	21900000000
+	Tb927.6.4440:mRNA-p1	Tb927.6.4440:mRNA-p1	Tb927.6.4440	RBP42	RNA.binding	1	9	1	1	16	16	16	1	16	16	16	5	9	5	4	14	9	5	9	5	4	14	9	5	9	5	4	14	9	51.4	51.4	51.4	37.718	352	352	0	323.31	23.6	36.4	23.3	21	47.4	35.2	13100000000
	Tb927.9.13990:mRNA-p1	Tb927.9.13990:mRNA-p1	Tb927.9.13990	DRBD2	RNA.binding	1	6	0	1	13	13	13	1	13	13	13	2	6	3	1	10	10	2	6	3	1	10	10	2	6	3	1	10	10	44.3	44.3	44.3	34.618	305	305	0	72.205	7.2	20.3	10.5	3.6	38	30.2	3220000000
+	Tb927.11.510:mRNA-p1;Tb927.11.500:mRNA-p1	Tb927.11.510:mRNA-p1;Tb927.11.500:mRNA-p1	Tb927.11.510	UBP2	RNA.binding	1	5	0	1	9;6	9;6	9;6	2	9	9	9	2	5	4	1	5	4	2	5	4	1	5	4	2	5	4	1	5	4	60	60	60	19.559	175	175;219	0	86.427	30.9	37.7	21.1	9.7	34.3	21.1	2130000000
+	Tb927.11.530:mRNA-p1	Tb927.11.530:mRNA-p1	Tb927.11.530	RBP3	RNA.binding	1	6	0	0	9	9	9	1	9	9	9	2	6	5	0	1	3	2	6	5	0	1	3	2	6	5	0	1	3	54.5	54.5	54.5	22.331	200	200	0	58.532	12	43.5	23	0	5.5	14.5	542000000
	Tb927.11.550:mRNA-p1	Tb927.11.550:mRNA-p1	Tb927.11.550	SCD6	RNA.degradation	1	4	0	0	12	12	12	1	12	12	12	4	3	3	0	9	7	4	3	3	0	9	7	4	3	3	0	9	7	59.6	59.6	59.6	31.292	280	280	0	170.98	23.2	21.1	21.1	0	47.1	32.1	2120000000
+	Tb927.9.10770:mRNA-p1	Tb927.9.10770:mRNA-p1	Tb927.9.10770	PABP2	Translation	1	22	1	1	62	62	62	1	62	62	62	18	22	11	34	55	39	18	22	11	34	55	39	18	22	11	34	55	39	76	76	76	62.147	555	555	0	323.31	34.2	43.2	23.1	63.1	74.1	69.9	134000000000
	Tb927.10.2110:mRNA-p1;Tb927.10.2100:mRNA-p1;Tb927.10.2090:mRNA-p1;Tb11.v5.1046.1-p1	Tb927.10.2110:mRNA-p1;Tb927.10.2100:mRNA-p1;Tb927.10.2090:mRNA-p1;Tb11.v5.1046.1-p1	Tb927.10.2110	EF1-alpha elongation factor 1-alpha, (TEF1)	Translation	1	6	1	1	32;32;32;32	32;32;32;32	32;32;32;32	4	32	32	32	4	6	4	6	28	17	4	6	4	6	28	17	4	6	4	6	28	17	70.8	70.8	70.8	49.105	449	449;449;449;449	0	323.31	12.5	20.7	9.1	19.6	67	45.9	21700000000
+	Tb927.11.14190:mRNA-p1	Tb927.11.14190:mRNA-p1	Tb927.11.14190	Staphylococcal nuclease homologue/Tudor domain containing protein, putative	ZUnknown	1	10	1	1	49	49	49	1	49	49	49	10	7	2	29	33	36	10	7	2	29	33	36	10	7	2	29	33	36	54.3	54.3	54.3	100.47	924	924	0	323.31	13	10	1.8	42	40.7	40.6	18100000000
+	Tb927.11.6440:mRNA-p1	Tb927.11.6440:mRNA-p1	Tb927.11.6440	hypothetical protein, conserved, Bromodomain and poly(Q), often in TAP MS, low similarity to coiled-coil proteins and hook proteins (cytoskeletal linkers)	ZUnknown	1	7	1	1	16	16	16	1	16	16	16	4	7	5	3	14	9	4	7	5	3	14	9	4	7	5	3	14	9	29.3	29.3	29.3	48.841	441	441	0	76.11	10.9	14.3	12.5	5.4	24.7	21.8	4930000000
	Tb927.4.4860:mRNA-p1;Tb11.v5.0540.1-p1;Tb927.4.4840:mRNA-p1;Tb927.4.4820:mRNA-p1	Tb927.4.4860:mRNA-p1;Tb11.v5.0540.1-p1;Tb927.4.4840:mRNA-p1;Tb927.4.4820:mRNA-p1	Tb927.4.4860	amino acid transporter 8, putative (AATP8)	Amino.acid.transport	0	0	0	0	2;2;1;1	2;2;1;1	2;2;1;1	4	2	2	2	0	0	0	0	2	0	0	0	0	0	2	0	0	0	0	0	2	0	7.6	7.6	7.6	50.631	473	473;490;473;473	0	86.181	0	0	0	0	7.6	0	307000000
	Tb927.8.8260:mRNA-p1;Tb927.8.8250:mRNA-p1;Tb927.8.8230:mRNA-p1	Tb927.8.8260:mRNA-p1;Tb927.8.8250:mRNA-p1;Tb927.8.8230:mRNA-p1	Tb927.8.8260	amino acid transporter, putative	Amino.acid.transport	0	0	0	0	1;1;1	1;1;1	1;1;1	3	1	1	1	0	0	0	0	1	0	0	0	0	0	1	0	0	0	0	0	1	0	2.6	2.6	2.6	49.461	460	460;461;461	0.0088009	1.1872	0	0	0	0	2.6	0	16600000
	Tb927.5.3800:mRNA-p1	Tb927.5.3800:mRNA-p1	Tb927.5.3800	glutamine hydrolysing (not ammonia-dependent) carbomoyl phosphate synthase, putative	Amino.acids	0	0	0	1	20	20	20	1	20	20	20	0	0	0	1	15	9	0	0	0	1	15	9	0	0	0	1	15	9	13.1	13.1	13.1	204.09	1833	1833	0	68.9	0	0	0	0.7	10.3	5.1	689000000
	Tb927.11.9590:mRNA-p1	Tb927.11.9590:mRNA-p1	Tb927.11.9590	S-adenosylhomocysteine hydrolase, putative	Amino.acids	0	0	0	0	20	20	20	1	20	20	20	0	0	0	0	15	13	0	0	0	0	15	13	0	0	0	0	15	13	39.8	39.8	39.8	48.447	437	437	0	85.308	0	0	0	0	34.8	25.4	2730000000
	Tb927.7.7040:mRNA-p1	Tb927.7.7040:mRNA-p1	Tb927.7.7040	methylthioadenosine phosphorylase, putative (MTAP)	Amino.acids	0	0	0	0	6	6	6	1	6	6	6	0	0	0	0	4	4	0	0	0	0	4	4	0	0	0	0	4	4	22	22	22	33.443	309	309	0	82.472	0	0	0	0	18.8	10.7	307000000
	Tb927.11.1560:mRNA-p1	Tb927.11.1560:mRNA-p1	Tb927.11.1560	1,2-Dihydroxy-3-keto-5-methylthiopentene dioxygenase, putative	Amino.acids	0	0	0	0	4	4	4	1	4	4	4	0	0	0	0	1	4	0	0	0	0	1	4	0	0	0	0	1	4	11.8	11.8	11.8	37.611	331	331	0	5.7925	0	0	0	0	3	11.8	244000000
	Tb11.v5.0820.1-p1;Tb927.2.4610:mRNA-p1;Tb927.2.4590:mRNA-p1	Tb11.v5.0820.1-p1;Tb927.2.4610:mRNA-p1;Tb927.2.4590:mRNA-p1	Tb927.2.4610	branched-chain amino acid aminotransferase, putative	Amino.acids	0	0	0	0	3;3;3	3;3;3	3;3;3	3	3	3	3	0	0	0	0	1	2	0	0	0	0	1	2	0	0	0	0	1	2	7.9	7.9	7.9	37.756	342	342;367;367	0	4.6843	0	0	0	0	3.5	4.4	41300000
	Tb927.7.1110:mRNA-p1	Tb927.7.1110:mRNA-p1	Tb927.7.1110	asparagine synthetase a, putative	Amino.acids	0	0	0	0	2	2	2	1	2	2	2	0	0	0	0	2	0	0	0	0	0	2	0	0	0	0	0	2	0	8.3	8.3	8.3	39.597	351	351	0	3.2685	0	0	0	0	8.3	0	37100000
	Tb927.9.2010:mRNA-p1	Tb927.9.2010:mRNA-p1	Tb927.9.2010	kynureninase, putative	Amino.acids	0	0	0	0	2	2	2	1	2	2	2	0	0	0	0	0	2	0	0	0	0	0	2	0	0	0	0	0	2	5.6	5.6	5.6	50.684	463	463	0	3.7485	0	0	0	0	0	5.6	34100000
	Tb927.4.360:mRNA-p1	Tb927.4.360:mRNA-p1	Tb927.4.360	1,2-Dihydroxy-3-keto-5-methylthiopentene dioxygenase, putative	Amino.acids	0	0	0	0	1	1	1	1	1	1	1	0	0	0	0	0	1	0	0	0	0	0	1	0	0	0	0	0	1	3.6	3.6	3.6	33.47	280	280	0.0035629	1.609	0	0	0	0	0	3.6	7370000
	Tb927.10.3660:mRNA-p1	Tb927.10.3660:mRNA-p1	Tb927.10.3660	aspartate aminotransferase	Amino.acids	0	0	0	0	1	1	1	1	1	1	1	0	0	0	0	1	0	0	0	0	0	1	0	0	0	0	0	1	0	2	2	2	44.787	403	403	0.0057078	1.3549	0	0	0	0	2	0	0
	Tb927.7.1910:mRNA-p1	Tb927.7.1910:mRNA-p1	Tb927.7.1910	pyridoxal phosphate containing glycine decarboxylase, putative	Amino.acids	0	0	0	0	1	1	1	1	1	1	1	0	0	0	0	1	0	0	0	0	0	1	0	0	0	0	0	1	0	1.3	1.3	1.3	106.29	970	970	0	2.9441	0	0	0	0	1.3	0	14600000
	Tb927.10.3560:mRNA-p1	Tb927.10.3560:mRNA-p1	Tb927.10.3560	arginine N-methyltransferase, PRMT1 prozyme	Arg.methylation	0	0	0	0	2	2	2	1	2	2	2	0	0	0	0	0	2	0	0	0	0	0	2	0	0	0	0	0	2	5.9	5.9	5.9	42.121	389	389	0	25.157	0	0	0	0	0	5.9	47900000
	Tb927.8.7980:mRNA-p1;Tb927.4.4380:mRNA-p1	Tb927.8.7980:mRNA-p1;Tb927.4.4380:mRNA-p1	Tb927.8.7980	vacuolar-type H( )-translocating pyrophosphatase (TVP1)	Calcium	0	0	0	0	5;5	5;5	5;5	2	5	5	5	0	0	0	0	2	4	0	0	0	0	2	4	0	0	0	0	2	4	8.8	8.8	8.8	86.003	826	826;826	0	33.305	0	0	0	0	3	7	282000000
	Tb927.9.3280:mRNA-p1	Tb927.9.3280:mRNA-p1	Tb927.9.3280	acidocalcisomal exopolyphosphatase	Calcium	0	0	0	0	2	2	2	1	2	2	2	0	0	0	0	1	1	0	0	0	0	1	1	0	0	0	0	1	1	5	5	5	42.865	383	383	0	5.7753	0	0	0	0	2.6	2.3	28600000
	Tb927.11.12220:mRNA-p1	Tb927.11.12220:mRNA-p1	Tb927.11.12220	catalytic subunit of the vacuolar transporter chaperone 4, polyphosphate polymerase, Vtc4	Calcium	0	0	0	0	1	1	1	1	1	1	1	0	0	0	0	1	0	0	0	0	0	1	0	0	0	0	0	1	0	1.6	1.6	1.6	91.361	793	793	0	3.052	0	0	0	0	1.6	0	14500000
	Tb927.11.17000:mRNA-p1;Tb11.v5.0404.1-p1	Tb927.11.17000:mRNA-p1;Tb11.v5.0404.1-p1	Tb927.11.17000	AIR9	Cell.cycle	0	2	1	1	30;16	30;16	30;16	2	30	30	30	2	2	0	6	23	18	2	2	0	6	23	18	2	2	0	6	23	18	36	36	36	109.72	999	999;723	0	258.77	3.1	3.4	0	7.3	30.3	20.6	5270000000
	Tb927.9.10920:mRNA-p1	Tb927.9.10920:mRNA-p1	Tb927.9.10920	KKT3, PK6 protein kinase,	Cell.cycle	0	0	0	0	2	2	2	1	2	2	2	0	0	0	0	2	0	0	0	0	0	2	0	0	0	0	0	2	0	1.4	1.4	1.4	118.15	1058	1058	0.0035971	1.6344	0	0	0	0	1.4	0	8050000
	Tb927.8.4810:mRNA-p1	Tb927.8.4810:mRNA-p1	Tb927.8.4810	prohibitin 1 (PHB1)	Cell.cycle	0	0	0	0	2	2	2	1	2	2	2	0	0	0	0	2	1	0	0	0	0	2	1	0	0	0	0	2	1	7.2	7.2	7.2	31.429	277	277	0	2.8074	0	0	0	0	7.2	3.2	30400000
	Tb927.11.5590:mRNA-p1	Tb927.11.5590:mRNA-p1	Tb927.11.5590	Anaphase-promoting complex APC1	Cell.cycle	0	0	0	0	1	1	1	1	1	1	1	0	0	0	0	1	0	0	0	0	0	1	0	0	0	0	0	1	0	1.3	1.3	1.3	82.5	749	749	0.0013004	2.0399	0	0	0	0	1.3	0	6890000
	Tb927.10.1070:mRNA-p1	Tb927.10.1070:mRNA-p1	Tb927.10.1070	CRK1 cdc2- like protein kinase	Cell.cycle	0	0	0	0	1	1	1	1	1	1	1	0	0	0	0	1	0	0	0	0	0	1	0	0	0	0	0	1	0	3.3	3.3	3.3	34.35	301	301	0	2.6941	0	0	0	0	3.3	0	0
	Tb927.11.10520:mRNA-p1	Tb927.11.10520:mRNA-p1	Tb927.11.10520	KKT2 kinetochore protein, tyrosine kinase, putative	Cell.cycle	0	0	0	0	1	1	1	1	1	1	1	0	0	0	0	1	0	0	0	0	0	1	0	0	0	0	0	1	0	1.3	1.3	1.3	139.2	1260	1260	0.0087912	1.1793	0	0	0	0	1.3	0	15100000
	Tb927.11.9080:mRNA-p1	Tb927.11.9080:mRNA-p1	Tb927.11.9080	NOP136	Cell.cycle	0	0	0	0	1	1	1	1	1	1	1	0	0	0	0	1	0	0	0	0	0	1	0	0	0	0	0	1	0	0.7	0.7	0.7	136.27	1216	1216	0.005767	1.4132	0	0	0	0	0.7	0	8470000
	Tb927.10.4310:mRNA-p1;Tb10.v4.0045:mRNA-p1	Tb927.10.4310:mRNA-p1;Tb10.v4.0045:mRNA-p1	Tb927.10.4310	prohibitin 2 (PHB2)	Cell.cycle	0	0	0	0	1;1	1;1	1;1	2	1	1	1	0	0	0	0	0	1	0	0	0	0	0	1	0	0	0	0	0	1	3.4	3.4	3.4	32.215	295	295;295	0	2.282	0	0	0	0	0	3.4	5770000
+	Tb927.10.10960:mRNA-p1;Tb927.10.10950:mRNA-p1;Tb927.10.10940:mRNA-p1;Tb927.10.10920:mRNA-p1;Tb927.10.10910:mRNA-p1;Tb927.10.10900:mRNA-p1;Tb927.10.10890:mRNA-p1;Tb11.v5.0543.1-p1;Tb927.10.10980:mRNA-p1;Tb927.10.10970:mRNA-p1;Tb927.10.10930:mRNA-p1	Tb927.10.10960:mRNA-p1;Tb927.10.10950:mRNA-p1;Tb927.10.10940:mRNA-p1;Tb927.10.10920:mRNA-p1;Tb927.10.10910:mRNA-p1;Tb927.10.10900:mRNA-p1;Tb927.10.10890:mRNA-p1;Tb11.v5.0543.1-p1;Tb927.10.10980:mRNA-p1;Tb927.10.10970:mRNA-p1;Tb927.10.10930:mRNA-p1	Tb927.10.10960	heat shock protein 83, HSP83	Chaperone	0	2	1	1	32;32;32;32;32;32;32;32;31;31;30	32;32;32;32;32;32;32;32;31;31;30	32;32;32;32;32;32;32;32;31;31;30	11	32	32	32	1	2	2	4	23	26	1	2	2	4	23	26	1	2	2	4	23	26	41.6	41.6	41.6	80.763	704	704;704;704;704;704;704;704;704;704;704;704	0	323.31	2	4.1	4.4	7.1	36.9	36.4	7160000000
	Tb927.11.11330:mRNA-p1;Tb11.v5.1035.1-p1;Tb927.11.11290:mRNA-p1;Tb11.v5.1034.1-p1	Tb927.11.11330:mRNA-p1;Tb11.v5.1035.1-p1	Tb927.11.11330	heat shock protein 70, major HSP70	Chaperone	0	3	0	1	24;24;5;4	24;24;5;4	21;21;4;4	4	24	24	21	0	0	3	1	14	15	0	0	3	1	14	15	0	0	3	1	13	13	43.4	43.4	38.9	71.408	661	661;689;676;203	0	178.13	0	0	4.8	2	26.5	28.7	2550000000
	Tb927.11.16760:mRNA-p1	Tb927.11.16760:mRNA-p1	Tb927.11.16760	Tric complex alpha subunit (TCP-1-alpha)	Chaperone	0	0	0	0	21	21	21	1	21	21	21	0	0	0	0	17	16	0	0	0	0	17	16	0	0	0	0	17	16	39.9	39.9	39.9	59.432	552	552	0	113.85	0	0	0	0	31.9	31.9	2000000000
	Tb927.11.3240:mRNA-p1	Tb927.11.3240:mRNA-p1	Tb927.11.3240	Tric complex zeta subunit (TCP-1-zeta)	Chaperone	0	0	0	0	20	20	20	1	20	20	20	0	0	0	0	12	16	0	0	0	0	12	16	0	0	0	0	12	16	42.5	42.5	42.5	59.579	544	544	0	85.945	0	0	0	0	28.5	35.5	1850000000
	Tb927.10.12710:mRNA-p1	Tb927.10.12710:mRNA-p1	Tb927.10.12710	heat shock protein, HSP110	Chaperone	0	1	0	0	17	17	17	1	17	17	17	1	0	1	0	10	11	1	0	1	0	10	11	1	0	1	0	10	11	24.4	24.4	24.4	90.863	811	811	0	66.64	1.1	0	1.7	0	15.3	15.9	1310000000
	Tb927.11.2650:mRNA-p1	Tb927.11.2650:mRNA-p1	Tb927.11.2650	heat shock protein 84, putative, mit HSp90	Chaperone	0	0	0	1	15	15	15	1	15	15	15	0	0	0	1	12	7	0	0	0	1	12	7	0	0	0	1	12	7	23.5	23.5	23.5	84.2	753	753	0	67.665	0	0	0	2	21.2	10.9	1020000000
	Tb927.10.1060:mRNA-p1	Tb927.10.1060:mRNA-p1	Tb927.10.1060	Tric complex delta subunit (TCP-1-delta)	Chaperone	0	0	0	0	12	12	12	1	12	12	12	0	0	0	0	3	12	0	0	0	0	3	12	0	0	0	0	3	12	20.7	20.7	20.7	58.361	536	536	0	41.253	0	0	0	0	6.3	20.7	330000000
	Tb927.10.8230:mRNA-p1;Tb11.v5.0668.1-p1	Tb927.10.8230:mRNA-p1;Tb11.v5.0668.1-p1	Tb927.10.8230	protein disulfide isomerase,ERp57-like, cofactor wth calnexin, putative	Chaperone	0	0	0	0	10;10	10;10	10;10	2	10	10	10	0	0	0	0	8	5	0	0	0	0	8	5	0	0	0	0	8	5	27.6	27.6	27.6	55.579	497	497;497	0	32.946	0	0	0	0	22.3	12.7	591000000
	Tb927.9.4500:mRNA-p1	Tb927.9.4500:mRNA-p1	Tb927.9.4500	HSP70, endoplasmatic reticulum, HSP70.a	Chaperone	0	0	0	0	8	8	8	1	8	8	8	0	0	0	0	2	6	0	0	0	0	2	6	0	0	0	0	2	6	13.1	13.1	13.1	91.117	835	835	0	19.346	0	0	0	0	4.4	8.6	145000000
	Tb927.9.11270:mRNA-p1	Tb927.9.11270:mRNA-p1	Tb927.9.11270	Tric complex eta subunit (TCP-1-eta)	Chaperone	0	0	0	0	8	8	8	1	8	8	8	0	0	0	0	6	3	0	0	0	0	6	3	0	0	0	0	6	3	17.8	17.8	17.8	61.471	568	568	0	50.963	0	0	0	0	12	9.5	211000000
	Tb927.7.710:mRNA-p1	Tb927.7.710:mRNA-p1	Tb927.7.710	heat shock 70 kDa protein, putative (HSP70.4)	Chaperone	0	0	0	0	7	4	4	1	7	4	4	0	0	0	0	3	4	0	0	0	0	2	2	0	0	0	0	2	2	12.5	7.8	7.8	70.211	639	639	0	8.5679	0	0	0	0	6.6	8.3	46600000
	Tb927.10.8190:mRNA-p1	Tb927.10.8190:mRNA-p1	Tb927.10.8190	Tric complex theta subunit (TCP-1-theta)	Chaperone	0	0	0	0	7	7	7	1	7	7	7	0	0	0	0	0	7	0	0	0	0	0	7	0	0	0	0	0	7	13.8	13.8	13.8	58.081	537	537	0	21.722	0	0	0	0	0	13.8	161000000
	Tb927.11.880:mRNA-p1	Tb927.11.880:mRNA-p1	Tb927.11.880	cyclophilin a,cyclophilin type peptidyl-prolyl cis-trans isomerase (CYPA)	Chaperone	0	1	0	0	5	5	5	1	5	5	5	0	1	0	0	4	2	0	1	0	0	4	2	0	1	0	0	4	2	37.3	37.3	37.3	18.717	177	177	0	14.662	0	6.8	0	0	29.4	14.1	625000000
	Tb927.9.3440:mRNA-p1	Tb927.9.3440:mRNA-p1	Tb927.9.3440	cyclophilin type peptidyl-prolyl cis-trans isomerase, putative (PPIase)	Chaperone	0	0	0	0	4	4	4	1	4	4	4	0	0	0	0	1	3	0	0	0	0	1	3	0	0	0	0	1	3	13.2	13.2	13.2	35.78	318	318	0	3.8492	0	0	0	0	5.3	7.9	62900000
	Tb927.9.9860:mRNA-p1	Tb927.9.9860:mRNA-p1	Tb927.9.9860	GRP170, HSP70 and actin-like ATPase domains	Chaperone	0	0	0	0	4	4	4	1	4	4	4	0	0	0	0	3	2	0	0	0	0	3	2	0	0	0	0	3	2	8.6	8.6	8.6	79.857	720	720	0	21.449	0	0	0	0	7.6	2.5	166000000
	Tb927.1.3200:mRNA-p1	Tb927.1.3200:mRNA-p1	Tb927.1.3200	SGT1-like protein, cold-shock domain	Chaperone	0	2	0	0	4	4	4	1	4	4	4	0	0	2	0	3	4	0	0	2	0	3	4	0	0	2	0	3	4	23.1	23.1	23.1	24.493	221	221	0	48.171	0	0	11.3	0	17.2	23.1	423000000
	Tb927.9.10230:mRNA-p1	Tb927.9.10230:mRNA-p1	Tb927.9.10230	ACDP23 HSP20 domain (p23-like)	Chaperone	0	0	0	0	3	3	3	1	3	3	3	0	0	0	0	1	2	0	0	0	0	1	2	0	0	0	0	1	2	20.2	20.2	20.2	18.769	168	168	0	6.5438	0	0	0	0	8.9	11.3	145000000
	Tb927.10.16100:mRNA-p1;Tb11.v5.0411.1-p1	Tb927.10.16100:mRNA-p1;Tb11.v5.0411.1-p1	Tb927.10.16100	FK506-binding protein (FKBP)-type peptidyl-prolyl isomerase	Chaperone	0	0	0	0	3;2	3;2	3;2	2	3	3	3	0	0	0	0	2	1	0	0	0	0	2	1	0	0	0	0	2	1	12.2	12.2	12.2	47.604	425	425;425	0	22.919	0	0	0	0	9.9	2.4	37500000
	Tb927.5.2940:mRNA-p1	Tb927.5.2940:mRNA-p1	Tb927.5.2940	stress-induced protein sti1, putative	Chaperone	0	0	0	0	3	3	3	1	3	3	3	0	0	0	0	3	1	0	0	0	0	3	1	0	0	0	0	3	1	5.5	5.5	5.5	62.327	550	550	0	5.8074	0	0	0	0	5.5	1.6	106000000
	Tb927.10.14380:mRNA-p1	Tb927.10.14380:mRNA-p1	Tb927.10.14380	Hsp70 protein, putative	Chaperone	0	0	0	0	2	2	2	1	2	2	2	0	0	0	0	2	0	0	0	0	0	2	0	0	0	0	0	2	0	2.3	2.3	2.3	92.77	861	861	0	2.8879	0	0	0	0	2.3	0	103000000
	Tb927.7.5790:mRNA-p1	Tb927.7.5790:mRNA-p1	Tb927.7.5790	protein disulfide isomerase, ERp44-like	Chaperone	0	0	0	0	2	2	2	1	2	2	2	0	0	0	0	2	0	0	0	0	0	2	0	0	0	0	0	2	0	12.6	12.6	12.6	15.401	135	135	0	3.5852	0	0	0	0	12.6	0	74500000
	Tb927.11.5220:mRNA-p1	Tb927.11.5220:mRNA-p1	Tb927.11.5220	chaperone DNAj, putative, J8	Chaperone	0	0	0	0	1	1	1	1	1	1	1	0	0	0	0	1	0	0	0	0	0	1	0	0	0	0	0	1	0	1	1	1	84.81	766	766	0.0087527	1.1712	0	0	0	0	1	0	10400000
	Tb927.6.2170:mRNA-p1	Tb927.6.2170:mRNA-p1	Tb927.6.2170	co-chaperone GrpE, putative	Chaperone	0	0	0	0	1	1	1	1	1	1	1	0	0	0	0	1	0	0	0	0	0	1	0	0	0	0	0	1	0	5	5	5	23.877	222	222	0.0046838	1.4941	0	0	0	0	5	0	0
	Tb927.9.10100:mRNA-p1	Tb927.9.10100:mRNA-p1	Tb927.9.10100	Possible histone methyltransferase: 7 SET domains.	Chromatin	0	0	0	0	10	10	10	1	10	10	10	0	0	0	0	7	4	0	0	0	0	7	4	0	0	0	0	7	4	7.7	7.7	7.7	160.65	1449	1449	0	26.584	0	0	0	0	5.9	2.4	263000000
	Tb927.10.10590:mRNA-p1;Tb927.10.10580:mRNA-p1;Tb927.10.10570:mRNA-p1;Tb927.10.10560:mRNA-p1;Tb927.10.10550:mRNA-p1;Tb927.10.10540:mRNA-p1;Tb927.10.10530:mRNA-p1;Tb927.10.10520:mRNA-p1;Tb927.10.10510:mRNA-p1;Tb927.10.10500:mRNA-p1;Tb927.10.10490:mRNA-p1;Tb927.10.10480:mRNA-p1;Tb927.10.10470:mRNA-p1;Tb927.10.10460:mRNA-p1;Tb927.10.10445:mRNA-p1	Tb927.10.10590:mRNA-p1;Tb927.10.10580:mRNA-p1;Tb927.10.10570:mRNA-p1;Tb927.10.10560:mRNA-p1;Tb927.10.10550:mRNA-p1;Tb927.10.10540:mRNA-p1;Tb927.10.10530:mRNA-p1;Tb927.10.10520:mRNA-p1;Tb927.10.10510:mRNA-p1;Tb927.10.10500:mRNA-p1;Tb927.10.10490:mRNA-p1;Tb927.10.10480:mRNA-p1;Tb927.10.10470:mRNA-p1;Tb927.10.10460:mRNA-p1;Tb927.10.10445:mRNA-p1	Tb927.10.10590	histone H2B	Chromatin	0	1	0	0	6;6;6;6;6;6;6;6;6;6;6;6;6;6;6	6;6;6;6;6;6;6;6;6;6;6;6;6;6;6	6;6;6;6;6;6;6;6;6;6;6;6;6;6;6	15	6	6	6	0	0	1	0	4	5	0	0	1	0	4	5	0	0	1	0	4	5	50.9	50.9	50.9	12.569	112	112;112;112;112;112;112;112;112;112;112;112;112;112;112;112	0	24.139	0	0	8.9	0	35.7	40.2	1520000000
	Tb927.7.2940:mRNA-p1;Tb927.7.2930:mRNA-p1;Tb927.7.2920:mRNA-p1;Tb927.7.2910:mRNA-p1;Tb927.7.2900:mRNA-p1;Tb927.7.2890:mRNA-p1;Tb927.7.2880:mRNA-p1;Tb927.7.2870:mRNA-p1;Tb927.7.2860:mRNA-p1;Tb927.7.2850:mRNA-p1;Tb927.7.2840:mRNA-p1;Tb927.7.2830:mRNA-p1;Tb927.7.2820:mRNA-p1	Tb927.7.2940:mRNA-p1;Tb927.7.2930:mRNA-p1;Tb927.7.2920:mRNA-p1;Tb927.7.2910:mRNA-p1;Tb927.7.2900:mRNA-p1;Tb927.7.2890:mRNA-p1;Tb927.7.2880:mRNA-p1;Tb927.7.2870:mRNA-p1;Tb927.7.2860:mRNA-p1;Tb927.7.2850:mRNA-p1;Tb927.7.2840:mRNA-p1;Tb927.7.2830:mRNA-p1;Tb927.7.2820:mRNA-p1	Tb927.7.2940	histone H2A	Chromatin	0	0	0	0	2;2;2;2;2;2;2;2;2;2;2;2;2	2;2;2;2;2;2;2;2;2;2;2;2;2	2;2;2;2;2;2;2;2;2;2;2;2;2	13	2	2	2	0	0	0	0	1	1	0	0	0	0	1	1	0	0	0	0	1	1	14.2	14.2	14.2	14.212	134	134;134;134;134;134;134;134;134;134;134;134;134;134	0	9.7438	0	0	0	0	6.7	7.5	94500000
	Tb927.10.7510:mRNA-p1	Tb927.10.7510:mRNA-p1	Tb927.10.7510	chromatin binding protein, putative	Chromatin	0	0	0	0	1	1	1	1	1	1	1	0	0	0	0	1	0	0	0	0	0	1	0	0	0	0	0	1	0	1.6	1.6	1.6	52.287	489	489	0.0056818	1.3278	0	0	0	0	1.6	0	13300000
+	Tb927.11.3250:mRNA-p1	Tb927.11.3250:mRNA-p1	Tb927.11.3250	dynein heavy chain	Cytoskeleton	0	0	1	1	29	29	29	1	29	29	29	0	0	0	4	22	4	0	0	0	4	22	4	0	0	0	4	22	4	7.2	7.2	7.2	531.18	4658	4658	0	120.12	0	0	0	1.1	5.5	0.7	719000000
	Tb927.3.930:mRNA-p1	Tb927.3.930:mRNA-p1	Tb927.3.930	OADalpha outer arm dynein heavy chain	Cytoskeleton	0	1	1	1	27	27	26	1	27	27	26	1	0	0	7	24	4	1	0	0	7	24	4	1	0	0	7	23	3	6.8	6.8	6.6	531.41	4639	4639	0	74.594	0.2	0	0	1.9	6.1	1.1	1260000000
	Tb927.1.2400:mRNA-p1;Tb927.1.2380:mRNA-p1;Tb927.1.2360:mRNA-p1;Tb927.1.2340:mRNA-p1;Tb11.v5.0468.1-p1	Tb927.1.2400:mRNA-p1;Tb927.1.2380:mRNA-p1;Tb927.1.2360:mRNA-p1;Tb927.1.2340:mRNA-p1;Tb11.v5.0468.1-p1	Tb927.1.2400	alpha tubulin	Cytoskeleton	0	7	1	1	25;25;25;25;14	25;25;25;25;14	25;25;25;25;14	5	25	25	25	1	7	1	4	19	12	1	7	1	4	19	12	1	7	1	4	19	12	68.5	68.5	68.5	49.787	451	451;451;451;451;249	0	323.31	3.3	23.7	3.3	11.3	56.5	32.6	9170000000
	Tb927.10.1170:mRNA-p1;Tb11.0560:mRNA-p1;Tb11.v5.0858.1-p1	Tb927.10.1170:mRNA-p1;Tb11.0560:mRNA-p1	Tb927.10.1170	intraflagellar transport protein IFT172	Cytoskeleton	0	2	1	1	18;11;2	18;11;2	18;11;2	3	18	18	18	2	0	1	8	12	7	2	0	1	8	12	7	2	0	1	8	12	7	13.9	13.9	13.9	196.6	1747	1747;1165;368	0	131.17	2	0	0.9	6.5	9.1	5.6	1030000000
	Tb927.1.2390:mRNA-p1;Tb927.1.2370:mRNA-p1;Tb927.1.2350:mRNA-p1;Tb927.1.2330:mRNA-p1;Tb11.v5.0469.1-p1;Tb927.1.2410:pseudogenic_transcript-p1	Tb927.1.2390:mRNA-p1;Tb927.1.2370:mRNA-p1;Tb927.1.2350:mRNA-p1;Tb927.1.2330:mRNA-p1;Tb11.v5.0469.1-p1;Tb927.1.2410:pseudogenic_transcript-p1	Tb927.1.2390	beta tubulin	Cytoskeleton	0	4	1	1	15;15;15;15;15;10	15;15;15;15;15;10	15;15;15;15;15;10	6	15	15	15	4	0	2	4	11	11	4	0	2	4	11	11	4	0	2	4	11	11	33.3	33.3	33.3	49.704	442	442;442;442;442;442;300	0	120.87	10	0	5	10	28.5	30.1	2560000000
	Tb927.7.3550:mRNA-p1	Tb927.7.3550:mRNA-p1	Tb927.7.3550	WCB	Cytoskeleton	0	2	1	1	10	10	10	1	10	10	10	2	0	0	5	5	4	2	0	0	5	5	4	2	0	0	5	5	4	8.7	8.7	8.7	138.16	1241	1241	0	28.972	3.1	0	0	5	5.2	2.9	442000000
+	Tb927.10.14890:mRNA-p1;Tb11.v5.0636.1-p1	Tb927.10.14890:mRNA-p1;Tb11.v5.0636.1-p1	Tb927.10.14890	C-terminal motor kinesin KIFC1	Cytoskeleton	0	0	0	1	27;27	27;27	27;27	2	27	27	27	0	0	0	1	19	19	0	0	0	1	19	19	0	0	0	1	19	19	36	36	36	90.8	820	820;820	0	308.59	0	0	0	3.2	24.6	26.5	2730000000
	Tb927.10.9570:mRNA-p1;Tb11.v5.0579.1-p1	Tb927.10.9570:mRNA-p1	Tb927.10.9570	paraflagellar rod protein PFC14	Cytoskeleton	0	1	0	0	25;9	25;9	25;9	2	25	25	25	1	0	0	0	15	17	1	0	0	0	15	17	1	0	0	0	15	17	29.1	29.1	29.1	118.67	1082	1082;608	0	202.59	1.1	0	0	0	18.4	19.5	1650000000
	Tb927.1.4310:mRNA-p1	Tb927.1.4310:mRNA-p1	Tb927.1.4310	FAZ2 flagellar attachment zone protein	Cytoskeleton	0	0	0	0	20	20	20	1	20	20	20	0	0	0	1	20	0	0	0	0	1	20	0	0	0	0	1	20	0	13.4	13.4	13.4	183.76	1638	1638	0	48.061	0	0	0	0.5	13.4	0	990000000
	Tb927.11.7560:mRNA-p1	Tb927.11.7560:mRNA-p1	Tb927.11.7560	CMF15, T. brucei components of motile flagella (TbCMF15)	Cytoskeleton	0	1	0	0	18	18	18	1	18	18	18	0	1	0	0	11	14	0	1	0	0	11	14	0	1	0	0	11	14	28.6	28.6	28.6	67.695	629	629	0	56.623	0	1.9	0	0	15.4	25.6	1400000000
	Tb927.3.4330:mRNA-p1;Tb927.3.4320:mRNA-p1;Tb927.3.4310:mRNA-p1;Tb927.3.4300:mRNA-p1;Tb927.3.4290:mRNA-p1;Tb11.v5.1055.1-p1	Tb927.3.4330:mRNA-p1;Tb927.3.4320:mRNA-p1;Tb927.3.4310:mRNA-p1;Tb927.3.4300:mRNA-p1;Tb927.3.4290:mRNA-p1;Tb11.v5.1055.1-p1	Tb927.3.4330	73 kDa paraflagellar rod protein. PFR1	Cytoskeleton	0	1	0	1	16;16;16;16;16;16	16;16;16;16;16;16	16;16;16;16;16;16	6	16	16	16	0	0	1	1	12	14	0	0	1	1	12	14	0	0	1	1	12	14	27.3	27.3	27.3	68.682	589	589;589;589;589;589;589	0	121.16	0	0	2.2	1.5	22.1	22.6	1820000000
	Tb927.10.13800:mRNA-p1	Tb927.10.13800:mRNA-p1	Tb927.10.13800	hypothetical protein, conserved, no yeast or human match	Cytoskeleton	0	4	0	1	15	15	15	1	15	15	15	1	4	1	1	10	9	1	4	1	1	10	9	1	4	1	1	10	9	38.3	38.3	38.3	46.281	431	431	0	54.606	2.8	18.1	2.8	2.8	27.8	22.7	1080000000
	Tb11.v5.0394.1-p1;Tb927.10.15750:mRNA-p1	Tb11.v5.0394.1-p1;Tb927.10.15750:mRNA-p1	Tb927.10.15750	P197, tripartite attachment complex component	Cytoskeleton	0	7	0	1	15;14	15;14	15;14	2	15	15	15	7	0	0	9	9	1	7	0	0	9	9	1	7	0	0	9	9	1	30.5	30.5	30.5	183.78	1612	1612;1748	0	35.543	18.5	0	0	23.1	23.6	3.2	424000000
	Tb927.4.560:mRNA-p1	Tb927.4.560:mRNA-p1	Tb927.4.560	Cytoplasmic dynein 2 heavy chain (DYNC2H1), putative	Cytoskeleton	0	0	0	0	14	14	14	1	14	14	14	0	0	0	2	12	0	0	0	0	2	12	0	0	0	0	2	12	0	3.8	3.8	3.8	479.84	4232	4232	0	43.78	0	0	0	0.7	3.1	0	241000000
	Tb927.5.3030:mRNA-p1	Tb927.5.3030:mRNA-p1	Tb927.5.3030	intraflagellar transport protein IFT122B	Cytoskeleton	0	0	0	1	11	11	11	1	11	11	11	0	0	0	1	9	2	0	0	0	1	9	2	0	0	0	1	9	2	10	10	10	140.63	1260	1260	0	23.417	0	0	0	0.6	7.9	2.2	238000000
	Tb927.11.2430:mRNA-p1	Tb927.11.2430:mRNA-p1	Tb927.11.2430	dynein heavy chain DHC1b or DYNC2H2, cytoplasmic type	Cytoskeleton	0	0	0	0	9	9	9	1	9	9	9	0	0	0	0	9	0	0	0	0	0	9	0	0	0	0	0	9	0	2.9	2.9	2.9	484.96	4307	4307	0	17.39	0	0	0	0	2.9	0	174000000
	Tb927.11.1740:mRNA-p1	Tb927.11.1740:mRNA-p1	Tb927.11.1740	intraflagellar transport protein IFT88	Cytoskeleton	0	0	0	0	9	9	9	1	9	9	9	0	0	0	0	4	6	0	0	0	0	4	6	0	0	0	0	4	6	11.9	11.9	11.9	89.754	800	800	0	17.309	0	0	0	0	4.5	8.5	186000000
	Tb927.10.14990:mRNA-p1	Tb927.10.14990:mRNA-p1	Tb927.10.14990	intraflagellar transport protein IFT80/CHE2	Cytoskeleton	0	0	0	1	8	8	8	1	8	8	8	0	0	0	1	6	5	0	0	0	1	6	5	0	0	0	1	6	5	10.9	10.9	10.9	86.676	782	782	0	24.442	0	0	0	1.3	8.8	5.2	331000000
	Tb927.10.14470:mRNA-p1	Tb927.10.14470:mRNA-p1	Tb927.10.14470	intraflagellar transport protein IFT140	Cytoskeleton	0	0	0	0	8	8	8	1	8	8	8	0	0	0	0	5	4	0	0	0	0	5	4	0	0	0	0	5	4	5.6	5.6	5.6	186.61	1696	1696	0	14.377	0	0	0	0	3.8	2.4	192000000
	Tb927.9.1750:mRNA-p1	Tb927.9.1750:mRNA-p1	Tb927.9.1750	Fibronectin type III domain containing protein, putative	Cytoskeleton	0	0	0	0	7	7	7	1	7	7	7	0	0	0	1	6	0	0	0	0	1	6	0	0	0	0	1	6	0	2.5	2.5	2.5	502.8	4479	4479	0	13.64	0	0	0	0.4	2.1	0	119000000
	Tb927.8.2630:mRNA-p1	Tb927.8.2630:mRNA-p1	Tb927.8.2630	KIN-C. Trypanosome-specific kinesin family 2	Cytoskeleton	0	0	0	0	7	7	7	1	7	7	7	0	0	0	0	2	6	0	0	0	0	2	6	0	0	0	0	2	6	10.1	10.1	10.1	85.189	750	750	0	11.516	0	0	0	0	2.5	8.7	84600000
	Tb927.11.1090:mRNA-p1;Tb11.v5.1038.1-p1;Tb927.11.1100:mRNA-p1;Tb927.11.1110.1-p1	Tb927.11.1090:mRNA-p1;Tb11.v5.1038.1-p1;Tb927.11.1100:mRNA-p1;Tb927.11.1110.1-p1	Tb927.11.1090	ClpGM6	Cytoskeleton	0	0	0	1	6;4;3;3	6;4;3;3	4;4;3;3	4	6	6	4	0	0	0	3	3	1	0	0	0	3	3	1	0	0	0	2	3	0	24.3	24.3	23.9	658.93	5837	5837;1576;1096;1520	0	9.2414	0	0	0	12.4	23.4	0.1	93900000
	Tb927.7.920:mRNA-p1	Tb927.7.920:mRNA-p1	Tb927.7.920	IAD-5 inner arm dynein heavy chain, clathrin-associated	Cytoskeleton	0	0	0	1	6	5	5	1	6	5	5	0	0	0	1	5	1	0	0	0	1	4	0	0	0	0	1	4	0	2	1.8	1.8	468.08	4112	4112	0	10.707	0	0	0	0.3	1.8	0.2	75600000
	Tb927.8.3100:mRNA-p1	Tb927.8.3100:mRNA-p1	Tb927.8.3100	coronin (CRN12)	Cytoskeleton	0	0	0	0	6	6	6	1	6	6	6	0	0	0	0	3	3	0	0	0	0	3	3	0	0	0	0	3	3	11.8	11.8	11.8	54.719	499	499	0	31.418	0	0	0	0	6	5.8	325000000
	Tb927.11.5000:mRNA-p1	Tb927.11.5000:mRNA-p1	Tb927.11.5000	dynein intermediate chain IC78, putative	Cytoskeleton	0	0	0	0	6	6	6	1	6	6	6	0	0	0	0	5	4	0	0	0	0	5	4	0	0	0	0	5	4	9	9	9	73.293	655	655	0	10.369	0	0	0	0	7.8	5.8	243000000
	Tb927.3.3000:mRNA-p1	Tb927.3.3000:mRNA-p1	Tb927.3.3000	flagellar transport protein, putative (PIFTC3)	Cytoskeleton	0	0	0	0	6	6	6	1	6	6	6	0	0	0	0	5	2	0	0	0	0	5	2	0	0	0	0	5	2	11.1	11.1	11.1	64.892	566	566	0	17.467	0	0	0	0	11.1	2.8	136000000
	Tb927.11.11220:mRNA-p1	Tb927.11.11220:mRNA-p1	Tb927.11.11220	dynein heavy chain	Cytoskeleton	0	0	0	0	5	4	4	1	5	4	4	0	0	0	0	5	1	0	0	0	0	4	0	0	0	0	0	4	0	1.3	1.1	1.1	480.25	4242	4242	0	4.1466	0	0	0	0	1.3	0.2	116000000
	Tb927.11.2270:mRNA-p1	Tb927.11.2270:mRNA-p1	Tb927.11.2270	dynein intermediate chain IC140 (IDA7)	Cytoskeleton	0	0	0	0	5	5	5	1	5	5	5	0	0	0	0	3	2	0	0	0	0	3	2	0	0	0	0	3	2	5.1	5.1	5.1	90.406	809	809	0	7.7306	0	0	0	0	2.8	2.2	44200000
	Tb927.3.5490:mRNA-p1	Tb927.3.5490:mRNA-p1	Tb927.3.5490	flagellar transport protein, putative (PIFTB2)	Cytoskeleton	0	0	0	0	5	5	5	1	5	5	5	0	0	0	0	3	2	0	0	0	0	3	2	0	0	0	0	3	2	12	12	12	79.115	689	689	0	18.658	0	0	0	0	6.4	5.7	102000000
	Tb927.8.4780:mRNA-p1	Tb927.8.4780:mRNA-p1	Tb927.8.4780	FLAM3	Cytoskeleton	0	0	0	0	5	5	5	1	5	5	5	0	0	0	0	5	0	0	0	0	0	5	0	0	0	0	0	5	0	2	2	2	468.13	4151	4151	0	6.1621	0	0	0	0	2	0	53600000
	Tb927.8.3250:mRNA-p1	Tb927.8.3250:mRNA-p1	Tb927.8.3250	IAD-1beta inner arm dynein heavy chain	Cytoskeleton	0	0	0	0	5	5	5	1	5	5	5	0	0	0	0	5	0	0	0	0	0	5	0	0	0	0	0	5	0	1.1	1.1	1.1	537.36	4674	4674	0	7.5637	0	0	0	0	1.1	0	81900000
	Tb927.9.9870:mRNA-p1	Tb927.9.9870:mRNA-p1	Tb927.9.9870	MCAK-like kinesin, putative	Cytoskeleton	0	0	0	0	5	5	5	1	5	5	5	0	0	0	0	4	2	0	0	0	0	4	2	0	0	0	0	4	2	8.7	8.7	8.7	53.501	482	482	0	16.947	0	0	0	0	5.8	4.4	170000000
	Tb927.6.3670:mRNA-p1	Tb927.6.3670:mRNA-p1	Tb927.6.3670	paraflagellar rod protein PFC8	Cytoskeleton	0	0	0	0	5	5	5	1	5	5	5	0	0	0	0	5	0	0	0	0	0	5	0	0	0	0	0	5	0	1.8	1.8	1.8	359.21	3222	3222	0	6.1917	0	0	0	0	1.8	0	126000000
	Tb927.11.1430:mRNA-p1	Tb927.11.1430:mRNA-p1	Tb927.11.1430	CMF2, T. brucei components of motile flagella (TbCMF2)	Cytoskeleton	0	0	0	0	4	4	4	1	4	4	4	0	0	0	0	1	3	0	0	0	0	1	3	0	0	0	0	1	3	6	6	6	86.855	752	752	0	5.3599	0	0	0	0	2.3	3.7	33000000
	Tb927.5.2950:mRNA-p1	Tb927.5.2950:mRNA-p1	Tb927.5.2950	CMF3, T. brucei components of motile flagella (TbCMF3)	Cytoskeleton	0	0	0	0	4	4	4	1	4	4	4	0	0	0	0	3	2	0	0	0	0	3	2	0	0	0	0	3	2	5.1	5.1	5.1	88.256	779	779	0	6.1572	0	0	0	0	3.9	2.2	88900000
	Tb927.3.5020:mRNA-p1	Tb927.3.5020:mRNA-p1	Tb927.3.5020	Flagellar Member 6 (FLAM6)	Cytoskeleton	0	0	0	0	4	4	4	1	4	4	4	0	0	0	0	4	0	0	0	0	0	4	0	0	0	0	0	4	0	4.2	4.2	4.2	155.86	1413	1413	0	11.722	0	0	0	0	4.2	0	141000000
	Tb927.6.3150:mRNA-p1	Tb927.6.3150:mRNA-p1	Tb927.6.3150	Hydin,flagellar component	Cytoskeleton	0	0	0	0	4	4	4	1	4	4	4	0	0	0	0	3	1	0	0	0	0	3	1	0	0	0	0	3	1	1	1	1	501.13	4521	4521	0	9.9118	0	0	0	0	0.8	0.2	54300000
	Tb927.10.8830:mRNA-p1	Tb927.10.8830:mRNA-p1	Tb927.10.8830	FAZ5	Cytoskeleton	0	0	0	1	3	3	3	1	3	3	3	0	0	0	1	2	1	0	0	0	1	2	1	0	0	0	1	2	1	10.4	10.4	10.4	66.659	585	585	0	7.1528	0	0	0	3.1	5	5.5	51900000
	Tb927.9.8880:mRNA-p1;Tb927.9.8850:mRNA-p1	Tb927.9.8880:mRNA-p1;Tb927.9.8850:mRNA-p1	Tb927.9.8880	actin A	Cytoskeleton	0	0	0	0	3;3	3;3	3;3	2	3	3	3	0	0	0	0	2	1	0	0	0	0	2	1	0	0	0	0	2	1	15.2	15.2	15.2	41.895	376	376;376	0	15.802	0	0	0	0	12.5	2.7	69000000
	Tb927.10.16110:mRNA-p1;Tb11.v5.0527.1-p1	Tb927.10.16110:mRNA-p1;Tb11.v5.0527.1-p1	Tb927.10.16110	CMF1, possible component of motile flagella	Cytoskeleton	0	0	0	0	3;3	3;3	3;3	2	3	3	3	0	0	0	0	2	2	0	0	0	0	2	2	0	0	0	0	2	2	8.8	8.8	8.8	42.99	386	386;386	0	4.3791	0	0	0	0	6.2	5.2	92500000
	Tb927.4.870:mRNA-p1	Tb927.4.870:mRNA-p1	Tb927.4.870	dynein heavy chain DNAH10 IAD-1alpha inner arm dynein heavy chain	Cytoskeleton	0	0	0	0	3	2	2	1	3	2	2	0	0	0	0	3	1	0	0	0	0	2	0	0	0	0	0	2	0	0.7	0.5	0.5	527.12	4599	4599	0	16.741	0	0	0	0	0.7	0.2	43700000
	Tb927.11.715:mRNA-p1;Tb927.11.18680:mRNA-p1;Tb11.0845:mRNA-p1	Tb927.11.715:mRNA-p1;Tb927.11.18680:mRNA-p1;Tb11.0845:mRNA-p1	Tb927.11.715	dynein light chain LC8, putative	Cytoskeleton	0	0	0	0	3;3;3	3;3;3	3;3;3	3	3	3	3	0	0	0	0	3	0	0	0	0	0	3	0	0	0	0	0	3	0	26.7	26.7	26.7	10.429	90	90;90;90	0	8.6248	0	0	0	0	26.7	0	119000000
	Tb927.3.5540:mRNA-p1	Tb927.3.5540:mRNA-p1	Tb927.3.5540	FAP133, Component of the IFT dynein motor	Cytoskeleton	0	0	0	0	3	3	3	1	3	3	3	0	0	0	0	2	1	0	0	0	0	2	1	0	0	0	0	2	1	6.9	6.9	6.9	58.074	534	534	0	3.4339	0	0	0	0	4.9	2.1	148000000
	Tb927.7.3330:mRNA-p1	Tb927.7.3330:mRNA-p1	Tb927.7.3330	FAZ10 flagellar attachment zone protein	Cytoskeleton	0	0	0	0	3	3	3	1	3	3	3	0	0	0	2	1	0	0	0	0	2	1	0	0	0	0	2	1	0	27.3	27.3	27.3	502.65	4334	4334	0	6.024	0	0	0	15.2	12.1	0	66600000
	Tb927.10.2880:mRNA-p1	Tb927.10.2880:mRNA-p1	Tb927.10.2880	FAZ26 calcium channel protein, putative	Cytoskeleton	0	0	0	0	3	3	3	1	3	3	3	0	0	0	0	3	0	0	0	0	0	3	0	0	0	0	0	3	0	1	1	1	303.77	2693	2693	0	4.2142	0	0	0	0	1	0	58500000
	Tb927.11.12530:mRNA-p1	Tb927.11.12530:mRNA-p1	Tb927.11.12530	FAZ3 flagellar attachment zone protein	Cytoskeleton	0	0	0	0	3	3	3	1	3	3	3	0	0	0	0	2	1	0	0	0	0	2	1	0	0	0	0	2	1	3.6	3.6	3.6	90.654	806	806	0	3.7743	0	0	0	0	2.6	1	28700000
	Tb927.10.840:mRNA-p1;Tb11.v5.0753.1-p1	Tb927.10.840:mRNA-p1	Tb927.10.840	FAZ6 flagellar attachment zone protein	Cytoskeleton	0	0	0	0	3;1	3;1	3;1	2	3	3	3	0	0	0	2	1	0	0	0	0	2	1	0	0	0	0	2	1	0	2.7	2.7	2.7	195.48	1719	1719;708	0	2.9511	0	0	0	2.3	0.4	0	32300000
	Tb927.8.5460:mRNA-p1;Tb927.8.5465:mRNA-p1;Tb927.8.5440:mRNA-p1;Tb11.v5.0798.1-p1;Tb927.8.5470:mRNA-p1;Tb11.v5.0797.1-p1	Tb927.8.5460:mRNA-p1;Tb927.8.5465:mRNA-p1;Tb927.8.5440:mRNA-p1;Tb11.v5.0798.1-p1;Tb927.8.5470:mRNA-p1;Tb11.v5.0797.1-p1	Tb927.8.5460	flagellar calcium-binding protein,44 kDa calflagin, (Tb-44)	Cytoskeleton	0	0	0	0	3;2;2;2;2;2	3;2;2;2;2;2	3;2;2;2;2;2	6	3	3	3	0	0	0	0	2	2	0	0	0	0	2	2	0	0	0	0	2	2	13	13	13	45.718	407	407;218;218;218;233;283	0	17.673	0	0	0	0	10.3	6.1	201000000
	Tb927.9.13440:mRNA-p1	Tb927.9.13440:mRNA-p1	Tb927.9.13440	Flagellar Member 5 (FLAM5)	Cytoskeleton	0	0	0	0	3	3	3	1	3	3	3	0	0	0	0	3	0	0	0	0	0	3	0	0	0	0	0	3	0	2.2	2.2	2.2	177.37	1578	1578	0	5.8081	0	0	0	0	2.2	0	26300000
	Tb927.11.2610:mRNA-p1	Tb927.11.2610:mRNA-p1	Tb927.11.2610	hypothetical protein, conserved, no domains, no yeast or human match	Cytoskeleton	0	0	0	0	3	3	3	1	3	3	3	0	0	0	0	1	2	0	0	0	0	1	2	0	0	0	0	1	2	7.2	7.2	7.2	50.887	461	461	0	4.3485	0	0	0	0	3.7	3.5	46600000
	Tb927.2.5270:mRNA-p1	Tb927.2.5270:mRNA-p1	Tb927.2.5270	IAD-3 inner arm dynein heavy chain	Cytoskeleton	0	0	0	0	3	2	2	1	3	2	2	0	0	0	0	3	1	0	0	0	0	2	0	0	0	0	0	2	0	0.7	0.5	0.5	485.74	4246	4246	0	2.9169	0	0	0	0	0.7	0.2	48000000
	Tb927.10.5380:mRNA-p1;Tb11.v5.0337.1-p1	Tb927.10.5380:mRNA-p1;Tb11.v5.0337.1-p1	Tb927.10.5380	intraflagellar transport protein IFT122	Cytoskeleton	0	0	0	0	3;2	3;2	3;2	2	3	3	3	0	0	0	0	2	2	0	0	0	0	2	2	0	0	0	0	2	2	3.2	3.2	3.2	139.43	1242	1242;1231	0	7.1087	0	0	0	0	2.3	1.5	79700000
	Tb927.9.7720:mRNA-p1	Tb927.9.7720:mRNA-p1	Tb927.9.7720	Member of IFT complex A, tetratricopeptide repeat protein	Cytoskeleton	0	0	0	0	3	3	3	1	3	3	3	0	0	0	0	1	2	0	0	0	0	1	2	0	0	0	0	1	2	2.8	2.8	2.8	152.89	1362	1362	0	11.381	0	0	0	0	1	1.8	52900000
	Tb927.10.10140:mRNA-p1	Tb927.10.10140:mRNA-p1	Tb927.10.10140	paraflagellar rod protein PFC19	Cytoskeleton	0	0	0	0	3	3	3	1	3	3	3	0	0	0	0	2	2	0	0	0	0	2	2	0	0	0	0	2	2	14.5	14.5	14.5	37.014	331	331	0	10.672	0	0	0	0	7.6	10	151000000
	Tb927.11.260:mRNA-p1	Tb927.11.260:mRNA-p1	Tb927.11.260	PIFTF6 ,predicted WD40 repeat	Cytoskeleton	0	0	0	0	3	3	3	1	3	3	3	0	0	0	0	3	0	0	0	0	0	3	0	0	0	0	0	3	0	3.3	3.3	3.3	149.06	1356	1356	0	5.37	0	0	0	0	3.3	0	72800000
	Tb927.11.13780:mRNA-p1	Tb927.11.13780:mRNA-p1	Tb927.11.13780	profilin	Cytoskeleton	0	0	0	0	3	3	3	1	3	3	3	0	0	0	0	2	1	0	0	0	0	2	1	0	0	0	0	2	1	20	20	20	16.122	150	150	0	13.1	0	0	0	0	20	12	64900000
	Tb927.10.650:mRNA-p1	Tb927.10.650:mRNA-p1	Tb927.10.650	TAX-2, flagellar protein	Cytoskeleton	0	0	0	0	3	3	3	1	3	3	3	0	0	0	0	2	2	0	0	0	0	2	2	0	0	0	0	2	2	10.5	10.5	10.5	25.588	220	220	0	3.1133	0	0	0	0	6.8	7.3	22900000
	Tb927.11.13230:mRNA-p1	Tb927.11.13230:mRNA-p1	Tb927.11.13230	TbVAP, flagellar attachment zone	Cytoskeleton	0	0	0	0	3	3	3	1	3	3	3	0	0	0	0	3	1	0	0	0	0	3	1	0	0	0	0	3	1	13.9	13.9	13.9	23.909	216	216	0	5.7486	0	0	0	0	13.9	3.7	188000000
	Tb927.7.6290:mRNA-p1	Tb927.7.6290:mRNA-p1	Tb927.7.6290	kinesin, putative (TbKIF9A)	Cytoskeleton	0	1	0	0	3	3	3	1	3	3	3	0	0	1	0	1	2	0	0	1	0	1	2	0	0	1	0	1	2	4.9	4.9	4.9	96.951	891	891	0	3.9294	0	0	0.9	0	2	2.9	164000000
	Tb927.10.8940:mRNA-p1	Tb927.10.8940:mRNA-p1	Tb927.10.8940	Flagellum tageting protein KHARON1	Cytoskeleton	0	0	0	1	2	2	2	1	2	2	2	0	0	0	1	1	1	0	0	0	1	1	1	0	0	0	1	1	1	6.8	6.8	6.8	45.398	411	411	0	2.338	0	0	0	3.4	3.4	3.4	51900000
	Tb927.6.4140:mRNA-p1	Tb927.6.4140:mRNA-p1	Tb927.6.4140	paraflagellar rod protein PFC4	Cytoskeleton	0	0	0	1	2	2	2	1	2	2	2	0	0	0	1	2	2	0	0	0	1	2	2	0	0	0	1	2	2	19.1	19.1	19.1	13.009	115	115	0	7.6758	0	0	0	9.6	19.1	19.1	506000000
	Tb927.5.1680:mRNA-p1	Tb927.5.1680:mRNA-p1	Tb927.5.1680	axoneme protein	Cytoskeleton	0	0	0	0	2	2	2	1	2	2	2	0	0	0	0	2	0	0	0	0	0	2	0	0	0	0	0	2	0	1.2	1.2	1.2	194.69	1751	1751	0.002439	1.7484	0	0	0	0	1.2	0	22800000
	Tb927.8.4210:mRNA-p1	Tb927.8.4210:mRNA-p1	Tb927.8.4210	BBP46	Cytoskeleton	0	0	0	0	2	2	2	1	2	2	2	0	0	0	0	1	1	0	0	0	0	1	1	0	0	0	0	1	1	5	5	5	46.138	419	419	0	2.2889	0	0	0	0	2.1	2.9	23100000
	Tb927.8.4870:mRNA-p1	Tb927.8.4870:mRNA-p1	Tb927.8.4870	DIGIT, flagellar component	Cytoskeleton	0	0	0	0	2	2	2	1	2	2	2	0	0	0	0	2	0	0	0	0	0	2	0	0	0	0	0	2	0	1.6	1.6	1.6	136.49	1204	1204	0	2.8797	0	0	0	0	1.6	0	54700000
	Tb927.11.8160:mRNA-p1	Tb927.11.8160:mRNA-p1	Tb927.11.8160	dynein heavy chain	Cytoskeleton	0	0	0	0	2	2	2	1	2	2	2	0	0	0	0	2	0	0	0	0	0	2	0	0	0	0	0	2	0	0.4	0.4	0.4	473.83	4152	4152	0.0024661	1.7768	0	0	0	0	0.4	0	11300000
	Tb927.1.2670:mRNA-p1	Tb927.1.2670:mRNA-p1	Tb927.1.2670	flagellar protein PF16	Cytoskeleton	0	0	0	0	2	2	2	1	2	2	2	0	0	0	0	1	1	0	0	0	0	1	1	0	0	0	0	1	1	4.3	4.3	4.3	56.126	513	513	0	3.9245	0	0	0	0	2.1	2.1	28000000
	Tb927.8.1540:mRNA-p1	Tb927.8.1540:mRNA-p1	Tb927.8.1540	hypothetical protein, conserved	Cytoskeleton	0	0	0	0	2	2	2	1	2	2	2	0	0	0	0	1	1	0	0	0	0	1	1	0	0	0	0	1	1	2.4	2.4	2.4	97.778	890	890	0.0035672	1.6172	0	0	0	0	1.5	0.9	31900000
	Tb11.v5.0242.1-p1;Tb927.10.5350:mRNA-p1	Tb11.v5.0242.1-p1;Tb927.10.5350:mRNA-p1	Tb927.10.5350	IAD-4 inner arm dynein heavy chain	Cytoskeleton	0	0	0	0	2;2	2;2	2;2	2	2	2	2	0	0	0	0	2	0	0	0	0	0	2	0	0	0	0	0	2	0	0.6	0.6	0.6	395.23	3448	3448;4142	0.0013228	2.1575	0	0	0	0	0.6	0	28100000
	Tb927.5.2410:mRNA-p1	Tb927.5.2410:mRNA-p1	Tb927.5.2410	KIN-E kinesin	Cytoskeleton	0	0	0	0	2	2	2	1	2	2	2	0	0	0	1	1	0	0	0	0	1	1	0	0	0	0	1	1	0	2.2	2.2	2.2	149.64	1339	1339	0.002457	1.7691	0	0	0	1.2	1	0	14900000
	Tb927.11.2490:mRNA-p1	Tb927.11.2490:mRNA-p1	Tb927.11.2490	Kinesin-3	Cytoskeleton	0	0	0	0	2	2	2	1	2	2	2	0	0	0	0	2	0	0	0	0	0	2	0	0	0	0	0	2	0	1.7	1.7	1.7	172.38	1572	1572	0	13.913	0	0	0	0	1.7	0	0
	Tb927.8.6660:mRNA-p1	Tb927.8.6660:mRNA-p1	Tb927.8.6660	paraflagellar rod protein PFC1	Cytoskeleton	0	0	0	0	2	2	2	1	2	2	2	0	0	0	0	1	1	0	0	0	0	1	1	0	0	0	0	1	1	3.3	3.3	3.3	69.055	607	607	0	2.4885	0	0	0	0	1.6	1.6	30400000
	Tb927.10.8930:mRNA-p1	Tb927.10.8930:mRNA-p1	Tb927.10.8930	paraflagellar rod protein PFC18	Cytoskeleton	0	0	0	0	2	2	2	1	2	2	2	0	0	0	0	2	0	0	0	0	0	2	0	0	0	0	0	2	0	2.3	2.3	2.3	80.014	710	710	0.0012594	1.8913	0	0	0	0	2.3	0	60800000
	Tb927.7.1920:mRNA-p1	Tb927.7.1920:mRNA-p1	Tb927.7.1920	paraflagellar rod protein PFC5	Cytoskeleton	0	0	0	0	2	2	2	1	2	2	2	0	0	0	0	0	2	0	0	0	0	0	2	0	0	0	0	0	2	3.3	3.3	3.3	59.271	543	543	0.0013021	2.0451	0	0	0	0	0	3.3	19100000
	Tb927.10.14010:mRNA-p1	Tb927.10.14010:mRNA-p1	Tb927.10.14010	RP2 basal body protein, required for axoneme formation	Cytoskeleton	0	0	0	0	2	2	2	1	2	2	2	0	0	0	0	2	1	0	0	0	0	2	1	0	0	0	0	2	1	3.5	3.5	3.5	50.631	463	463	0	4.8803	0	0	0	0	3.5	1.5	61800000
	Tb927.4.1610:mRNA-p1	Tb927.4.1610:mRNA-p1	Tb927.4.1610	TAC40 component of tripartite attachment complex	Cytoskeleton	0	0	0	0	2	2	2	1	2	2	2	0	0	0	0	2	0	0	0	0	0	2	0	0	0	0	0	2	0	5.6	5.6	5.6	39.631	359	359	0	3.134	0	0	0	0	5.6	0	34400000
	Tb927.11.2440:mRNA-p1	Tb927.11.2440:mRNA-p1	Tb927.11.2440	TBCCD1, bilobe, centrioles, cell body anterior	Cytoskeleton	0	0	0	0	2	2	2	1	2	2	2	0	0	0	0	2	0	0	0	0	0	2	0	0	0	0	0	2	0	6.7	6.7	6.7	59.28	540	540	0	4.6547	0	0	0	0	6.7	0	11100000
	Tb927.10.8780:mRNA-p1	Tb927.10.8780:mRNA-p1	Tb927.10.8780	AAA domain containing protein, putative	Cytoskeleton	0	0	0	0	1	1	1	1	1	1	1	0	0	0	0	1	0	0	0	0	0	1	0	0	0	0	0	1	0	0.9	0.9	0.9	244.9	2169	2169	0	4.8846	0	0	0	0	0.9	0	16800000
	Tb927.10.5810:mRNA-p1	Tb927.10.5810:mRNA-p1	Tb927.10.5810	BARTL1	Cytoskeleton	0	0	0	0	1	1	1	1	1	1	1	0	0	0	0	1	0	0	0	0	0	1	0	0	0	0	0	1	0	2.3	2.3	2.3	48.257	433	433	0.0088398	1.1945	0	0	0	0	2.3	0	62900000
	Tb927.4.2080:mRNA-p1	Tb927.4.2080:mRNA-p1	Tb927.4.2080	CC2D is a FAZ-ER protein, also present on the basal bodies. CC2D is required for FAZ filament assembly.	Cytoskeleton	0	0	0	0	1	1	1	1	1	1	1	0	0	0	0	0	1	0	0	0	0	0	1	0	0	0	0	0	1	1.2	1.2	1.2	104.88	906	906	0	3.5412	0	0	0	0	0	1.2	26400000
	Tb927.10.7690:mRNA-p1	Tb927.10.7690:mRNA-p1	Tb927.10.7690	CMF4, T. brucei components of motile flagella (TbCMF4)	Cytoskeleton	0	0	0	0	1	1	1	1	1	1	1	0	0	0	0	1	0	0	0	0	0	1	0	0	0	0	0	1	0	1.4	1.4	1.4	82.837	724	724	0	2.2175	0	0	0	0	1.4	0	10200000
	Tb927.2.4810:mRNA-p1	Tb927.2.4810:mRNA-p1	Tb927.2.4810	CMF5, T. brucei components of motile flagella (TbCMF5)	Cytoskeleton	0	0	0	0	1	1	1	1	1	1	1	0	0	0	0	1	0	0	0	0	0	1	0	0	0	0	0	1	0	0.6	0.6	0.6	150.5	1340	1340	0.0077951	1.2238	0	0	0	0	0.6	0	7270000
	Tb927.11.7740:mRNA-p1;Tb927.11.7707:mRNA-p1	Tb927.11.7740:mRNA-p1;Tb927.11.7707:mRNA-p1	Tb927.11.7740	dynein light chain, putative,dynein Tctex2 family, putative	Cytoskeleton	0	0	0	0	1;1	1;1	1;1	2	1	1	1	0	0	0	0	0	1	0	0	0	0	0	1	0	0	0	0	0	1	10.4	10.4	10.4	13.077	115	115;125	0.0012563	1.8873	0	0	0	0	0	10.4	5570000
	Tb927.3.3300:mRNA-p1	Tb927.3.3300:mRNA-p1	Tb927.3.3300	FAZ19 flagellar attachment zone protein	Cytoskeleton	0	0	0	0	1	1	1	1	1	1	1	0	0	0	0	1	0	0	0	0	0	1	0	0	0	0	0	1	0	2	2	2	89.197	814	814	0.0057405	1.3891	0	0	0	0	2	0	14700000
	Tb927.3.3690:mRNA-p1	Tb927.3.3690:mRNA-p1	Tb927.3.3690	flagellar radial spoke protein-like, putative	Cytoskeleton	0	0	0	0	1	1	1	1	1	1	1	0	0	0	0	1	0	0	0	0	0	1	0	0	0	0	0	1	0	2.4	2.4	2.4	60.992	548	548	0.0078125	1.2245	0	0	0	0	2.4	0	20500000
	Tb11.v5.0892.1-p1;Tb927.6.1730:mRNA-p1	Tb11.v5.0892.1-p1;Tb927.6.1730:mRNA-p1	Tb927.6.1730	hypothetical protein, conserved, resembles various yeast myosins	Cytoskeleton	0	0	0	0	1;1	1;1	1;1	2	1	1	1	0	0	0	0	1	0	0	0	0	0	1	0	0	0	0	0	1	0	1.6	1.6	1.6	89.193	803	803;1276	0.0013158	2.1076	0	0	0	0	1.6	0	42500000
	Tb927.10.14980:mRNA-p1	Tb927.10.14980:mRNA-p1	Tb927.10.14980	intraflagellar transport protein IFT52	Cytoskeleton	0	0	0	0	1	1	1	1	1	1	1	0	0	0	0	0	1	0	0	0	0	0	1	0	0	0	0	0	1	1.7	1.7	1.7	72.377	655	655	0	3.7041	0	0	0	0	0	1.7	6870000
	Tb927.7.5650:mRNA-p1;Tb11.v5.0849.1-p1;Tb927.5.2090:mRNA-p1;Tb927.10.15390:mRNA-p1;Tb11.v5.0434.1-p1;Tb927.10.15400:mRNA-p1	Tb927.7.5650:mRNA-p1;Tb11.v5.0849.1-p1;Tb927.5.2090:mRNA-p1;Tb927.10.15390:mRNA-p1;Tb11.v5.0434.1-p1;Tb927.10.15400:mRNA-p1	Tb927.7.5650	Kinesin-4/10	Cytoskeleton	0	0	0	0	1;1;1;1;1;1	1;1;1;1;1;1	1;1;1;1;1;1	6	1	1	1	0	0	0	0	1	1	0	0	0	0	1	1	0	0	0	0	1	1	1.7	1.7	1.7	71.253	638	638;803;1088;1095;1095;1682	0	2.7224	0	0	0	0	1.7	1.7	77600000
	Tb927.11.8950:mRNA-p1	Tb927.11.8950:mRNA-p1	Tb927.11.8950	LRRP1 leucine rich repeat), in bilobe	Cytoskeleton	0	0	0	0	1	1	1	1	1	1	1	0	0	0	0	1	0	0	0	0	0	1	0	0	0	0	0	1	0	1.5	1.5	1.5	78.96	713	713	0	2.5255	0	0	0	0	1.5	0	11100000
	Tb927.8.7450:mRNA-p1	Tb927.8.7450:mRNA-p1	Tb927.8.7450	myosin heavy chain kinase A, putative	Cytoskeleton	0	0	0	0	1	1	1	1	1	1	1	0	0	0	0	0	1	0	0	0	0	0	1	0	0	0	0	0	1	4.3	4.3	4.3	36.961	327	327	1	-2	0	0	0	0	0	4.3	8570000
	Tb927.7.4290:mRNA-p1	Tb927.7.4290:mRNA-p1	Tb927.7.4290	NUDC1 Nuclear migration protein	Cytoskeleton	0	0	0	0	1	1	1	1	1	1	1	0	0	0	0	0	1	0	0	0	0	0	1	0	0	0	0	0	1	2.7	2.7	2.7	33.703	297	297	0.001261	1.899	0	0	0	0	0	2.7	9430000
	Tb927.11.13500:mRNA-p1	Tb927.11.13500:mRNA-p1	Tb927.11.13500	paraflagellar rod protein par1	Cytoskeleton	0	0	0	0	1	1	1	1	1	1	1	0	0	0	0	0	1	0	0	0	0	0	1	0	0	0	0	0	1	2.2	2.2	2.2	68.349	592	592	1	-2	0	0	0	0	0	2.2	128000000
	Tb927.11.4480:mRNA-p1	Tb927.11.4480:mRNA-p1	Tb927.11.4480	radial spoke protein RSP4/6, putative	Cytoskeleton	0	0	0	0	1	1	1	1	1	1	1	0	0	0	0	1	1	0	0	0	0	1	1	0	0	0	0	1	1	2.9	2.9	2.9	66.905	585	585	0	8.1829	0	0	0	0	2.9	2.9	97400000
	Tb927.6.3840:mRNA-p1	Tb927.6.3840:mRNA-p1	Tb927.6.3840	reticulon domain protein	Cytoskeleton	0	0	0	0	1	1	1	1	1	1	1	0	0	0	0	1	0	0	0	0	0	1	0	0	0	0	0	1	0	4.8	4.8	4.8	21.071	186	186	0.0057803	1.4323	0	0	0	0	4.8	0	10800000
	Tb927.9.10370:mRNA-p1	Tb927.9.10370:mRNA-p1	Tb927.9.10370	TAX-1, flagellar protein	Cytoskeleton	0	0	0	0	1	1	1	1	1	1	1	0	0	0	0	0	1	0	0	0	0	0	1	0	0	0	0	0	1	2.8	2.8	2.8	40.684	363	363	0.0087816	1.1776	0	0	0	0	0	2.8	18200000
	Tb927.4.1270:mRNA-p1	Tb927.4.1270:mRNA-p1	Tb927.4.1270	ruvB-like DNA helicase, putative	DNA	0	0	0	0	4	4	4	1	4	4	4	0	0	0	0	4	2	0	0	0	0	4	2	0	0	0	0	4	2	10.7	10.7	10.7	49.905	459	459	0	9.9948	0	0	0	0	10.7	4.4	194000000
	Tb927.11.11550:mRNA-p1	Tb927.11.11550:mRNA-p1	Tb927.11.11550	DNA topoisomerase II alpha, putative	DNA	0	0	0	0	1	1	1	1	1	1	1	0	0	0	0	1	0	0	0	0	0	1	0	0	0	0	0	1	0	0.6	0.6	0.6	164.65	1455	1455	0.0013038	2.0462	0	0	0	0	0.6	0	15600000
	Tb927.9.4390:mRNA-p1	Tb927.9.4390:mRNA-p1	Tb927.9.4390	DNA-damage inducible protein DDI1-like protein (1L12.395)	DNA	0	0	0	0	1	1	1	1	1	1	1	0	0	0	0	0	1	0	0	0	0	0	1	0	0	0	0	0	1	3.2	3.2	3.2	40.992	378	378	0	3.6737	0	0	0	0	0	3.2	14200000
	Tb927.11.9130:mRNA-p1	Tb927.11.9130:mRNA-p1	Tb927.11.9130	replication factor A, 51kDa subunit, putative	DNA	0	0	0	0	1	1	1	1	1	1	1	0	0	0	0	1	1	0	0	0	0	1	1	0	0	0	0	1	1	2.4	2.4	2.4	52.331	463	463	0.0087623	1.1743	0	0	0	0	2.4	2.4	40800000
+	Tb927.5.1210:mRNA-p1	Tb927.5.1210:mRNA-p1	Tb927.5.1210	short-chain dehydrogenase, putative	Enzyme	0	0	1	1	13	13	13	1	13	13	13	0	0	0	3	10	8	0	0	0	3	10	8	0	0	0	3	10	8	49.8	49.8	49.8	33.876	311	311	0	90.125	0	0	0	9.6	41.2	24.1	3040000000
	Tb927.10.7230:mRNA-p1;Tb11.v5.0615.1-p1	Tb927.10.7230:mRNA-p1	Tb927.10.7230	hypothetical protein, conserved, 7 nucleoside diphostate kinase domains	Enzyme	0	0	0	0	9;3	9;3	9;3	2	9	9	9	0	0	0	0	7	2	0	0	0	0	7	2	0	0	0	0	7	2	4.8	4.8	4.8	284.7	2521	2521;677	0	14.259	0	0	0	0	3.9	0.8	187000000
	Tb927.5.1460:mRNA-p1	Tb927.5.1460:mRNA-p1	Tb927.5.1460	Mo/Co carrier or lysine decarboxylase	Enzyme	0	0	0	0	6	6	6	1	6	6	6	0	0	0	0	6	4	0	0	0	0	6	4	0	0	0	0	6	4	19	19	19	36.762	326	326	0	18.321	0	0	0	0	19	11.3	524000000
	Tb927.11.8380:mRNA-p1;Tb11.02.5420b.1-p1;Tb11.02.5420:mRNA-p1	Tb927.11.8380:mRNA-p1;Tb11.02.5420b.1-p1;Tb11.02.5420:mRNA-p1	Tb927.11.8380	NADPH--cytochrome p450 reductase, putative (CPR)	Enzyme	0	0	0	0	4;2;2	4;2;2	4;2;2	3	4	4	4	0	0	0	0	3	1	0	0	0	0	3	1	0	0	0	0	3	1	5.6	5.6	5.6	70.273	629	629;631;631	0	4.9212	0	0	0	0	4.1	1.4	111000000
	Tb927.11.13360:mRNA-p1	Tb927.11.13360:mRNA-p1	Tb927.11.13360	AAA ATPase, putative	Enzyme	0	0	0	0	3	3	3	1	3	3	3	0	0	0	0	3	0	0	0	0	0	3	0	0	0	0	0	3	0	3	3	3	141.17	1281	1281	0	9.2735	0	0	0	0	3	0	56400000
	Tb11.v5.0641.1-p1;Tb927.10.1990:mRNA-p1	Tb11.v5.0641.1-p1;Tb927.10.1990:mRNA-p1	Tb927.10.1990	major vault protein, putative (MVP)	Enzyme	0	0	0	0	3;3	3;3	3;3	2	3	3	3	0	0	0	0	2	1	0	0	0	0	2	1	0	0	0	0	2	1	8.1	8.1	8.1	45.419	408	408;863	0	4.8421	0	0	0	0	5.4	2.7	80700000
	Tb927.4.4650:mRNA-p1	Tb927.4.4650:mRNA-p1	Tb927.4.4650	diphthine synthase, putative	Enzyme	0	0	0	0	2	2	2	1	2	2	2	0	0	0	0	1	1	0	0	0	0	1	1	0	0	0	0	1	1	15.6	15.6	15.6	29.49	269	269	0	2.2241	0	0	0	0	9.7	5.9	22500000
	Tb927.7.5210:mRNA-p1	Tb927.7.5210:mRNA-p1	Tb927.7.5210	hypothetical protein, conserved, phosphatase domain and DUF	Enzyme	0	0	0	0	2	2	2	1	2	2	2	0	0	0	0	0	2	0	0	0	0	0	2	0	0	0	0	0	2	2.4	2.4	2.4	100.48	898	898	0	11.392	0	0	0	0	0	2.4	25400000
	Tb927.3.4420:mRNA-p1	Tb927.3.4420:mRNA-p1	Tb927.3.4420	hypothetical protein, conserved, alpha/beta hydrolase domain	Enzyme	0	0	0	0	1	1	1	1	1	1	1	0	0	0	0	1	0	0	0	0	0	1	0	0	0	0	0	1	0	2.7	2.7	2.7	49.984	443	443	0.0013175	2.1367	0	0	0	0	2.7	0	10800000
	Tb927.10.5670:mRNA-p1	Tb927.10.5670:mRNA-p1	Tb927.10.5670	N-acetyltransferase subunit Nat1, putative (NAT1)	Enzyme	0	0	0	0	1	1	1	1	1	1	1	0	0	0	0	0	1	0	0	0	0	0	1	0	0	0	0	0	1	1.4	1.4	1.4	82.189	711	711	0.0057339	1.3799	0	0	0	0	0	1.4	7770000
	Tb927.10.3150:mRNA-p1	Tb927.10.3150:mRNA-p1	Tb927.10.3150	N-acetyltransferase, putative	Enzyme	0	0	0	0	1	1	1	1	1	1	1	0	0	0	0	1	0	0	0	0	0	1	0	0	0	0	0	1	0	5.4	5.4	5.4	23.621	205	205	0.0077691	1.2153	0	0	0	0	5.4	0	15600000
	Tb927.7.1930:mRNA-p1	Tb927.7.1930:mRNA-p1	Tb927.7.1930	nucleoside diphosphatase, putative,ectonucleoside triphosphate diphosphohydrolase 5, putative	Enzyme	0	0	0	0	1	1	1	1	1	1	1	0	0	0	1	0	0	0	0	0	1	0	0	0	0	0	1	0	0	2	2	2	48.926	443	443	1	-2	0	0	0	2	0	0	0
	Tb927.6.1850:mRNA-p1	Tb927.6.1850:mRNA-p1	Tb927.6.1850	quiescin sulfhydryl oxidase (QSOX)	Enzyme	0	0	0	0	1	1	1	1	1	1	1	0	0	0	0	1	0	0	0	0	0	1	0	0	0	0	0	1	0	1.3	1.3	1.3	58.754	526	526	0.0046674	1.4898	0	0	0	0	1.3	0	9620000
	Tb927.6.4920:mRNA-p1;Tb927.6.4910:mRNA-p1;Tb927.6.4900:mRNA-p1;Tb927.6.4890:mRNA-p1;Tb927.6.4880:mRNA-p1;Tb927.6.4870:mRNA-p1;Tb927.6.4860:mRNA-p1;Tb927.6.4850:mRNA-p1;Tb927.6.4840:mRNA-p1	Tb927.6.4920:mRNA-p1;Tb927.6.4910:mRNA-p1;Tb927.6.4900:mRNA-p1;Tb927.6.4890:mRNA-p1;Tb927.6.4880:mRNA-p1;Tb927.6.4870:mRNA-p1;Tb927.6.4860:mRNA-p1;Tb927.6.4850:mRNA-p1;Tb927.6.4840:mRNA-p1	Tb927.6.4920	S-adenosylmethionine synthetase, putative (METK1)	Enzyme	0	0	0	0	1;1;1;1;1;1;1;1;1	1;1;1;1;1;1;1;1;1	1;1;1;1;1;1;1;1;1	9	1	1	1	0	0	0	0	1	0	0	0	0	0	1	0	0	0	0	0	1	0	3.8	3.8	3.8	43.54	397	397;397;397;397;397;397;397;397;397	0	2.8177	0	0	0	0	3.8	0	63200000
	Tb927.11.10020:mRNA-p1	Tb927.11.10020:mRNA-p1	Tb927.11.10020	short-chain dehydrogenase, putative	Enzyme	0	0	0	0	1	1	1	1	1	1	1	0	0	0	0	1	0	0	0	0	0	1	0	0	0	0	0	1	0	6.4	6.4	6.4	33.958	313	313	0	17.004	0	0	0	0	6.4	0	18100000
	Tb927.11.8440.1:mRNA-p1;Tb927.11.8440.2:mRNA-p1	Tb927.11.8440.1:mRNA-p1;Tb927.11.8440.2:mRNA-p1	Tb927.11.8440	haloacid dehalogenase-like hydrolase, putative	Enzyme	0	0	0	0	1;1	1;1	1;1	2	1	1	1	0	0	0	0	1	1	0	0	0	0	1	1	0	0	0	0	1	1	5.8	5.8	5.8	30.596	278	278;287	0	6.4856	0	0	0	0	5.8	5.8	13200000
	Tb11.v5.0826.1-p1;Tb927.7.6860:mRNA-p1	Tb11.v5.0826.1-p1;Tb927.7.6860:mRNA-p1	Tb927.7.6860	ESAG5, putative	ESAG	0	0	0	0	2;2	2;2	2;2	2	2	2	2	0	0	0	0	2	1	0	0	0	0	2	1	0	0	0	0	2	1	7.5	7.5	7.5	50.162	464	464;480	0	3.9686	0	0	0	0	7.5	2.6	103000000
	Tb10.v4.0101:pseudogenic_transcript-p1;Tb05.5K5.500:pseudogenic_transcript-p1;Tb08.27P2.160:pseudogenic_transcript-p1;Tb08.27P2.250:pseudogenic_transcript-p1;Tb927.3.460:pseudogenic_transcript-p1	Tb10.v4.0101:pseudogenic_transcript-p1;Tb05.5K5.500:pseudogenic_transcript-p1;Tb08.27P2.160:pseudogenic_transcript-p1;Tb08.27P2.250:pseudogenic_transcript-p1;Tb927.3.460:pseudogenic_transcript-p1	Tb10.v4.0101	ESAG pseudogene	ESAG.pseudo	0	0	0	0	2;1;1;1;1	2;1;1;1;1	2;1;1;1;1	5	2	2	2	0	0	0	0	2	1	0	0	0	0	2	1	0	0	0	0	2	1	14.7	14.7	14.7	25.909	224	224;343;364;366;368	0	9.6172	0	0	0	0	14.7	7.6	396000000
	Tb927.6.5490:pseudogenic_transcript-p1	Tb927.6.5490:pseudogenic_transcript-p1	Tb927.6.5490	ESAG3 pseudogene	ESAG.pseudo	0	0	0	0	1	1	1	1	1	1	1	0	0	0	0	1	0	0	0	0	0	1	0	0	0	0	0	1	0	2.8	2.8	2.8	40.006	363	363	0	4.9325	0	0	0	0	2.8	0	37400000
	Tb09.v4.0154:pseudogenic_transcript-p1	Tb09.v4.0154:pseudogenic_transcript-p1	Tb09.v4.0154	ESAG3 pseudogene	ESAG.pseudo	0	0	0	0	1	1	1	1	1	1	1	0	0	0	0	1	0	0	0	0	0	1	0	0	0	0	0	1	0	5.2	5.2	5.2	40.514	364	364	0	11.252	0	0	0	0	5.2	0	164000000
	Tb927.8.2210:mRNA-p1	Tb927.8.2210:mRNA-p1	Tb927.8.2210	pteridine reductase (PTR1)	Folate	0	1	0	0	1	1	1	1	1	1	1	0	0	1	0	0	0	0	0	1	0	0	0	0	0	1	0	0	0	5.2	5.2	5.2	28.47	268	268	0.0046784	1.4938	0	0	5.2	0	0	0	4020000
+	Tb927.10.5620:mRNA-p1;Tb11.v5.0531.1-p1	Tb927.10.5620:mRNA-p1;Tb11.v5.0531.1-p1	Tb927.10.5620	fructose-bisphosphate aldolase, glycosomal (ALD)	Glucose.glycerol	0	3	1	1	34;34	34;34	34;34	2	34	34	34	3	1	3	6	24	29	3	1	3	6	24	29	3	1	3	6	24	29	77.7	77.7	77.7	41.071	372	372;372	0	323.31	11.3	3.5	9.9	16.4	66.1	68.8	18900000000
	Tb927.6.4300:mRNA-p1;Tb927.6.4280:mRNA-p1	Tb927.6.4300:mRNA-p1;Tb927.6.4280:mRNA-p1	Tb927.6.4300	glyceraldehyde 3-phosphate dehydrogenase, glycosomal (GAPDH)	Glucose.glycerol	0	8	1	1	33;33	33;33	31;31	2	33	33	31	0	5	8	7	26	22	0	5	8	7	26	22	0	5	7	6	25	20	87.2	87.2	85	39.047	359	359;359	0	323.31	0	18.7	22.6	25.6	85	60.7	33800000000
+	Tb927.9.12630:mRNA-p1;Tb927.9.12590:mRNA-p1;Tb927.9.12570:mRNA-p1;Tb927.9.12550:mRNA-p1;Tb927.9.12610:mRNA-p1	Tb927.9.12630:mRNA-p1;Tb927.9.12590:mRNA-p1;Tb927.9.12570:mRNA-p1;Tb927.9.12550:mRNA-p1;Tb927.9.12610:mRNA-p1	Tb927.9.12630	glycerol kinase, glycosomal (glk1)	Glucose.glycerol	0	2	1	1	31;31;31;30;29	31;31;31;30;29	31;31;31;30;29	5	31	31	31	0	0	2	3	22	24	0	0	2	3	22	24	0	0	2	3	22	24	70.9	70.9	70.9	56.426	512	512;512;512;512;512	0	323.31	0	0	4.7	9.4	50.4	53.7	5840000000
	Tb927.10.6880:mRNA-p1;Tb11.v5.0516.1-p1	Tb927.10.6880:mRNA-p1;Tb11.v5.0516.1-p1	Tb927.10.6880	glyceraldehyde 3-phosphate dehydrogenase, cytosolic (GAP)	Glucose.glycerol	0	1	1	1	10;10	8;8	8;8	2	10	8	8	0	1	1	2	5	9	0	1	0	1	4	7	0	1	0	1	4	7	27.8	23.3	23.3	35.61	331	331;331	0	37.157	0	4.2	2.4	6.6	15.1	27.8	1410000000
	Tb927.10.2010:mRNA-p1	Tb927.10.2010:mRNA-p1	Tb927.10.2010	hexokinase (HK1)	Glucose.glycerol	0	2	0	1	25	25	0	1	25	25	0	0	0	2	1	15	20	0	0	2	1	15	20	0	0	0	0	0	0	57.7	57.7	0	51.295	471	471	0	157.41	0	0	3.6	1.9	35.5	49	3200000000
	Tb927.10.2020:mRNA-p1	Tb927.10.2020:mRNA-p1	Tb927.10.2020	hexokinase (HK2)	Glucose.glycerol	0	2	0	1	25	1	0	1	25	1	0	0	0	2	1	15	19	0	0	0	0	1	0	0	0	0	0	0	0	58.4	4.2	0	51.148	471	471	0	7.3323	0	0	3.6	1.9	36.1	45.4	45800000
	Tb927.1.3830:mRNA-p1	Tb927.1.3830:mRNA-p1	Tb927.1.3830	glucose-6-phosphate isomerase, glycosomal (PGI)	Glucose.glycerol	0	1	0	0	24	24	24	1	24	24	24	1	0	1	0	16	17	1	0	1	0	16	17	1	0	1	0	16	17	43.3	43.3	43.3	67.614	607	607	0	220.92	1.2	0	2.5	0	30.5	32.8	4290000000
	Tb927.2.4210:mRNA-p1	Tb927.2.4210:mRNA-p1	Tb927.2.4210	glycosomal phosphoenolpyruvate carboxykinase (PEPCK)	Glucose.glycerol	0	0	0	0	20	20	20	1	20	20	20	0	0	0	0	16	8	0	0	0	0	16	8	0	0	0	0	16	8	50.9	50.9	50.9	58.564	525	525	0	106.43	0	0	0	0	40.8	20	1430000000
	Tb927.11.7380:mRNA-p1	Tb927.11.7380:mRNA-p1	Tb927.11.7380	glycerol-3-phosphate dehydrogenase (FAD-dependent), mitochondrial, TAO complex	Glucose.glycerol	0	0	0	0	14	14	14	1	14	14	14	0	0	0	0	6	11	0	0	0	0	6	11	0	0	0	0	6	11	29.5	29.5	29.5	66.991	603	603	0	52.949	0	0	0	0	10.8	23.1	1030000000
	Tb927.8.3530:mRNA-p1	Tb927.8.3530:mRNA-p1	Tb927.8.3530	glycerol-3-phosphate dehydrogenase (NAD), glycosomal	Glucose.glycerol	0	2	0	1	12	12	12	1	12	12	12	0	0	2	1	10	9	0	0	2	1	10	9	0	0	2	1	10	9	50	50	50	37.805	354	354	0	94.462	0	0	6.8	3.1	43.5	33.3	3110000000
	Tb927.11.5520:mRNA-p1	Tb927.11.5520:mRNA-p1	Tb927.11.5520	triosephosphate isomerase (TIM)	Glucose.glycerol	0	1	0	0	10	10	10	1	10	10	10	0	0	1	0	7	8	0	0	1	0	7	8	0	0	1	0	7	8	51.2	51.2	51.2	26.819	250	250	0	86.219	0	0	6	0	36	44.8	1720000000
	Tb927.9.8720:mRNA-p1	Tb927.9.8720:mRNA-p1	Tb927.9.8720	fructose-1,6-bisphosphatase (FBPase)	Glucose.glycerol	0	0	0	0	7	7	7	1	7	7	7	0	0	0	0	5	4	0	0	0	0	5	4	0	0	0	0	5	4	26.3	26.3	26.3	38.534	350	350	0	34.392	0	0	0	0	20	12.9	432000000
	Tb927.9.9820:mRNA-p1	Tb927.9.9820:mRNA-p1	Tb927.9.9820	glyceraldehyde-3-phosphate dehydrogenase, putative	Glucose.glycerol	0	0	0	0	7	7	7	1	7	7	7	0	0	0	0	4	5	0	0	0	0	4	5	0	0	0	0	4	5	33.2	33.2	33.2	38.802	355	355	0	55.99	0	0	0	0	21.7	22	177000000
	Tb927.10.2890:mRNA-p1;Tb11.v5.0650.1-p1	Tb927.10.2890:mRNA-p1;Tb11.v5.0650.1-p1	Tb927.10.2890	enolase	Glucose.glycerol	0	0	0	0	6;6	6;6	6;6	2	6	6	6	0	0	0	0	6	3	0	0	0	0	6	3	0	0	0	0	6	3	17.5	17.5	17.5	46.592	429	429;429	0	30.009	0	0	0	0	17.5	8.6	378000000
	Tb927.10.7090:mRNA-p1	Tb927.10.7090:mRNA-p1	Tb927.10.7090	alternative oxidase (AOX or TAO complex)	Glucose.glycerol	0	0	0	0	4	4	4	1	4	4	4	0	0	0	0	4	1	0	0	0	0	4	1	0	0	0	0	4	1	18.5	18.5	18.5	37.59	329	329	0	15.517	0	0	0	0	18.5	4	250000000
	Tb927.8.2520:mRNA-p1	Tb927.8.2520:mRNA-p1	Tb927.8.2520	Acetyl-CoA synthetase	Glucose.glycerol	0	0	0	0	3	3	3	1	3	3	3	0	0	0	0	1	3	0	0	0	0	1	3	0	0	0	0	1	3	5.6	5.6	5.6	74.666	673	673	0	13.04	0	0	0	0	1.8	5.6	186000000
	Tb927.1.710:mRNA-p1;Tb927.1.700:mRNA-p1;Tb927.1.720:mRNA-p1	Tb927.1.710:mRNA-p1;Tb927.1.700:mRNA-p1	Tb927.1.710	phosphoglycerate kinase (PGKB)	Glucose.glycerol	0	0	0	0	3;3;1	3;3;1	3;3;1	3	3	3	3	0	0	0	0	3	0	0	0	0	0	3	0	0	0	0	0	3	0	11.7	11.7	11.7	45.247	420	420;440;509	0	6.6292	0	0	0	0	11.7	0	70600000
	Tb927.10.8480:mRNA-p1;Tb11.v5.0308.1-p1;Tb11.v5.0309.1-p1;Tb11.v5.0330.1-p1;Tb927.10.8440:mRNA-p1;Tb927.10.8460:mRNA-p1;Tb927.10.8470:mRNA-p1;Tb11.v5.0307.1-p1;Tb11.v5.0333.1-p1;Tb11.v5.0332.1-p1;Tb927.10.8510:mRNA-p1;Tb927.10.8500:mRNA-p1;Tb927.10.8490:mRNA-p1;Tb11.v5.0310.1-p1;Tb11.v5.0331.1-p1;Tb927.10.8520:mRNA-p1;Tb927.10.8450:mRNA-p1;Tb927.10.8530:mRNA-p1	Tb927.10.8480:mRNA-p1;Tb11.v5.0308.1-p1;Tb11.v5.0309.1-p1;Tb11.v5.0330.1-p1;Tb927.10.8440:mRNA-p1;Tb927.10.8460:mRNA-p1;Tb927.10.8470:mRNA-p1;Tb11.v5.0307.1-p1;Tb11.v5.0333.1-p1;Tb11.v5.0332.1-p1;Tb927.10.8510:mRNA-p1;Tb927.10.8500:mRNA-p1;Tb927.10.8490:mRNA-p1;Tb11.v5.0310.1-p1;Tb11.v5.0331.1-p1;Tb927.10.8520:mRNA-p1;Tb927.10.8450:mRNA-p1;Tb927.10.8530:mRNA-p1	Tb927.10.8480	glucose transporter, putative	Glucose.glycerol	0	0	0	0	2;2;2;2;2;2;2;2;1;1;1;1;1;1;1;1;1;1	2;2;2;2;2;2;2;2;1;1;1;1;1;1;1;1;1;1	2;2;2;2;2;2;2;2;1;1;1;1;1;1;1;1;1;1	18	2	2	2	0	0	0	0	1	1	0	0	0	0	1	1	0	0	0	0	1	1	4	4	4	56.516	527	527;527;527;527;527;527;527;527;322;529;529;529;529;527;529;529;527;529	0	4.7182	0	0	0	0	1.5	2.5	70300000
	Tb11.v5.0613.1-p1;Tb927.5.930:mRNA-p1;Tb927.10.3650:mRNA-p1	Tb11.v5.0613.1-p1;Tb927.5.930:mRNA-p1;Tb927.10.3650:mRNA-p1	Tb927.5.930	NADH-dependent fumarate reductase (FRDg)	Glucose.glycerol	0	0	0	0	2;2;1	2;2;1	1;1;0	3	2	2	1	0	0	0	0	1	1	0	0	0	0	1	1	0	0	0	0	0	1	2.6	2.6	1.3	67.692	624	624;1142;1232	0.0012739	1.9703	0	0	0	0	1.3	1.3	308000000
	Tb927.2.5800:mRNA-p1	Tb927.2.5800:mRNA-p1	Tb927.2.5800	sedoheptulose-1,7-bisphosphatase (SBPase)	Glucose.glycerol	0	0	0	0	2	2	2	1	2	2	2	0	0	0	0	0	2	0	0	0	0	0	2	0	0	0	0	0	2	7.5	7.5	7.5	35.502	332	332	0	3.3913	0	0	0	0	0	7.5	26800000
	Tb927.10.2490:mRNA-p1	Tb927.10.2490:mRNA-p1	Tb927.10.2490	glucose-6-phosphate 1-dehydrogenase (G6PD)	Glucose.glycerol	0	0	0	0	1	1	1	1	1	1	1	0	0	0	0	1	1	0	0	0	0	1	1	0	0	0	0	1	1	1.6	1.6	1.6	63.503	558	558	0.0067039	1.2282	0	0	0	0	1.6	1.6	4050000
	Tb927.11.2380:mRNA-p1	Tb927.11.2380:mRNA-p1	Tb927.11.2380	phosphoglycerate kinase, putative	Glucose.glycerol	0	0	0	0	1	1	1	1	1	1	1	0	0	0	0	1	0	0	0	0	0	1	0	0	0	0	0	1	0	1.2	1.2	1.2	100.85	913	913	0.0012516	1.8702	0	0	0	0	1.2	0	26400000
+	Tb927.5.890:mRNA-p1;Tb11.v5.0558.1-p1	Tb927.5.890:mRNA-p1	Tb927.5.890	oligosaccharyl transferase subunit, putative	Glycans	0	0	1	1	13;5	13;5	5;0	2	13	13	5	0	0	0	2	11	4	0	0	0	2	11	4	0	0	0	0	4	1	20.1	20.1	8.9	89.347	801	801;460	0	87.39	0	0	0	1.9	18.6	5.7	1500000000
+	Tb927.5.900:mRNA-p1;Tb927.5.910:mRNA-p1;Tb11.v5.0559.1-p1	Tb927.5.900:mRNA-p1;Tb927.5.910:mRNA-p1;Tb11.v5.0559.1-p1	Tb927.5.900	oligosaccharyl transferase subunit, putative	Glycans	0	0	1	1	12;11;7	4;3;4	4;3;4	3	12	4	4	0	0	0	2	11	5	0	0	0	0	4	2	0	0	0	0	4	2	17.1	6.1	6.1	92.232	821	821;821;354	0	87.506	0	0	0	1.8	17.1	7.8	445000000
	Tb927.10.13630:mRNA-p1	Tb927.10.13630:mRNA-p1	Tb927.10.13630	ER glucosidase II	Glycans	0	0	0	0	6	6	6	1	6	6	6	0	0	0	0	6	1	0	0	0	0	6	1	0	0	0	0	6	1	9.9	9.9	9.9	91.488	807	807	0	11.348	0	0	0	0	9.9	1	205000000
	Tb927.11.2520:mRNA-p1	Tb927.11.2520:mRNA-p1	Tb927.11.2520	UDP-N-acetylglucosamine pyrophosphorylase, putative	Glycans	0	0	0	0	4	4	4	1	4	4	4	0	0	0	0	2	2	0	0	0	0	2	2	0	0	0	0	2	2	8.3	8.3	8.3	60.161	545	545	0	15.281	0	0	0	0	5.5	2.8	81200000
	Tb927.3.4630:mRNA-p1	Tb927.3.4630:mRNA-p1	Tb927.3.4630	UDP-glucose:glycoprotein glucosyltransferase, ER quality control	Glycans	0	0	0	0	3	3	3	1	3	3	3	0	0	0	0	2	2	0	0	0	0	2	2	0	0	0	0	2	2	2.4	2.4	2.4	186.84	1675	1675	0	14.121	0	0	0	0	1.8	1.7	38000000
	Tb927.10.4610:mRNA-p1	Tb927.10.4610:mRNA-p1	Tb927.10.4610	dolicholphosphate-mannose synthase, putative	Glycans	0	0	0	0	2	2	2	1	2	2	2	0	0	0	0	2	0	0	0	0	0	2	0	0	0	0	0	2	0	12.4	12.4	12.4	29.086	259	259	0	3.4909	0	0	0	0	12.4	0	49000000
	Tb927.9.3400:mRNA-p1	Tb927.9.3400:mRNA-p1	Tb927.9.3400	endo-beta-N-acetylglucosaminidase, putative	Glycans	0	0	0	0	2	2	2	1	2	2	2	0	0	0	0	2	1	0	0	0	0	2	1	0	0	0	0	2	1	2.5	2.5	2.5	115.9	1051	1051	0	4.9917	0	0	0	0	2.5	1.3	49900000
	Tb927.3.5660:mRNA-p1	Tb927.3.5660:mRNA-p1	Tb927.3.5660	GnT11 UDP-GlcNAc:α3-D-mannoside β1–2-N-acetylglucosaminyltransferase I	Glycans	0	0	0	0	2	2	2	1	2	2	2	0	0	0	0	2	0	0	0	0	0	2	0	0	0	0	0	2	0	5.4	5.4	5.4	45.73	388	388	0	6.4027	0	0	0	0	5.4	0	40600000
	Tb927.10.13780:mRNA-p1;Tb11.v5.0718.1-p1	Tb927.10.13780:mRNA-p1;Tb11.v5.0718.1-p1	Tb927.10.13780	GSK3-short glycogen synthase kinase 3	Glycans	0	0	0	0	2;2	2;2	2;2	2	2	2	2	0	0	0	0	1	1	0	0	0	0	1	1	0	0	0	0	1	1	7.1	7.1	7.1	40.32	352	352;352	0	5.1406	0	0	0	0	4	3.1	34300000
	Tb927.6.1140:mRNA-p1	Tb927.6.1140:mRNA-p1	Tb927.6.1140	dolichyl-P-Man:GDP-Man5GlcNAc2-PP-dolichyl alpha-1,2-mannosyltransferase, putative	Glycans	0	0	0	0	1	1	1	1	1	1	1	0	0	0	0	1	0	0	0	0	0	1	0	0	0	0	0	1	0	1.9	1.9	1.9	75.202	674	674	0	3.261	0	0	0	0	1.9	0	24200000
	Tb927.3.3580:mRNA-p1	Tb927.3.3580:mRNA-p1	Tb927.3.3580	lipophosphoglycan biosynthetic protein, putative (LPG3)=GRP94 ER chaperone	Glycans	0	0	0	0	1	1	1	1	1	1	1	0	0	0	0	1	0	0	0	0	0	1	0	0	0	0	0	1	0	1.4	1.4	1.4	87.766	773	773	0.0057937	1.4423	0	0	0	0	1.4	0	26100000
	Tb927.4.4250:mRNA-p1;Tb927.4.4270:mRNA-p1;Tb927.4.4290:mRNA-p1	Tb927.4.4250:mRNA-p1;Tb927.4.4270:mRNA-p1;Tb927.4.4290:mRNA-p1	Tb927.4.4250	UDP-Gal or UDP-GlcNAc-dependent glycosyltransferase, putative	Glycans	0	1	0	0	1;1;1	1;1;1	1;1;1	3	1	1	1	0	0	1	0	0	1	0	0	1	0	0	1	0	0	1	0	0	1	4.7	4.7	4.7	44.532	384	384;384;385	0.0067114	1.2284	0	0	4.7	0	0	4.7	427000000
	Tb927.11.11520:mRNA-p1	Tb927.11.11520:mRNA-p1	Tb927.11.11520	PEX11 glycosomal membrane protein	Glycosome	0	0	0	0	6	6	6	1	6	6	6	0	0	0	0	5	2	0	0	0	0	5	2	0	0	0	0	5	2	20.6	20.6	20.6	24.027	218	218	0	10.003	0	0	0	0	20.6	6.9	735000000
	Tb927.9.11600:mRNA-p1;Tb927.9.11580:mRNA-p1	Tb927.9.11600:mRNA-p1;Tb927.9.11580:mRNA-p1	Tb927.9.11600	Gim5B protein,glycosomal membrane protein (gim5B)	Glycosome	0	0	0	0	2;2	2;2	2;2	2	2	2	2	0	0	0	0	1	1	0	0	0	0	1	1	0	0	0	0	1	1	12.4	12.4	12.4	25.975	241	241;243	0	15.472	0	0	0	0	5.8	6.6	128000000
	Tb927.3.3610:mRNA-p1	Tb927.3.3610:mRNA-p1	Tb927.3.3610	PEX7 peroxisomal targeting signal type 2 receptor	Glycosome	0	0	0	0	2	2	2	1	2	2	2	0	0	0	0	0	2	0	0	0	0	0	2	0	0	0	0	0	2	6.6	6.6	6.6	39.734	361	361	0	2.8756	0	0	0	0	0	6.6	50000000
	Tb927.11.1070:mRNA-p1	Tb927.11.1070:mRNA-p1	Tb927.11.1070	glycosomal transporter (GAT3)	Glycosome	0	0	0	0	1	1	1	1	1	1	1	0	0	0	0	1	0	0	0	0	0	1	0	0	0	0	0	1	0	1	1	1	75.51	684	684	0.0088106	1.1882	0	0	0	0	1	0	13200000
	Tb11.v5.0859.1-p1;Tb927.10.14240:mRNA-p1	Tb11.v5.0859.1-p1;Tb927.10.14240:mRNA-p1	Tb927.10.14240	N-myristoyltransferase (NMT)	GPI.anchors	0	0	0	0	6;6	6;6	6;6	2	6	6	6	0	0	0	0	3	3	0	0	0	0	3	3	0	0	0	0	3	3	19.6	19.6	19.6	43.077	378	378;446	0	22.318	0	0	0	0	11.9	7.7	261000000
	Tb927.10.13860:mRNA-p1	Tb927.10.13860:mRNA-p1	Tb927.10.13860	GPI-anchor transamidase subunit 8 (GPI8)	GPI.anchors	0	0	0	0	4	4	4	1	4	4	4	0	0	0	0	4	1	0	0	0	0	4	1	0	0	0	0	4	1	16.6	16.6	16.6	36.798	319	319	0	21.738	0	0	0	0	16.6	2.8	66600000
	Tb927.4.1920:mRNA-p1	Tb927.4.1920:mRNA-p1	Tb927.4.1920	GPI transamidase, putative (TbGPI16)	GPI.anchors	0	0	0	0	2	2	2	1	2	2	2	0	0	0	0	2	1	0	0	0	0	2	1	0	0	0	0	2	1	5	5	5	75.806	686	686	0	6.7133	0	0	0	0	5	1.2	174000000
	Tb927.2.6000:mRNA-p1	Tb927.2.6000:mRNA-p1	Tb927.2.6000	GPI phospholipase C	GPI.anchors	0	0	0	0	1	1	1	1	1	1	1	0	0	0	0	0	1	0	0	0	0	0	1	0	0	0	0	0	1	2.2	2.2	2.2	40.662	358	358	0.0097087	1.1198	0	0	0	0	0	2.2	0
	Tb927.10.210:mRNA-p1	Tb927.10.210:mRNA-p1	Tb927.10.210	GPI transamidase component GAA1	GPI.anchors	0	0	0	0	1	1	1	1	1	1	1	0	0	0	0	1	0	0	0	0	0	1	0	0	0	0	0	1	0	3.5	3.5	3.5	51.313	461	461	0	2.2156	0	0	0	0	3.5	0	18600000
	Tb11.v5.0865.1-p1;Tb927.6.390:pseudogenic_transcript-p1;Tb927.6.320:pseudogenic_transcript-p1;Tb927.6.340:pseudogenic_transcript-p1;Tb927.6.270:pseudogenic_transcript-p1;Tb927.4.4420:pseudogenic_transcript-p1;Tb927.7.7530:mRNA-p1;Tb927.7.7520:mRNA-p1;Tb927.4.4450:mRNA-p1;Tb927.4.4430:mRNA-p1;Tb927.4.4410:mRNA-p1;Tb927.4.4440:mRNA-p1;Tb927.4.4470:mRNA-p1;Tb927.4.4460:mRNA-p1	Tb11.v5.0865.1-p1;Tb927.6.390:pseudogenic_transcript-p1;Tb927.6.320:pseudogenic_transcript-p1;Tb927.6.340:pseudogenic_transcript-p1;Tb927.6.270:pseudogenic_transcript-p1;Tb927.4.4420:pseudogenic_transcript-p1;Tb927.7.7530:mRNA-p1;Tb927.7.7520:mRNA-p1;Tb927.4.4450:mRNA-p1;Tb927.4.4430:mRNA-p1;Tb927.4.4410:mRNA-p1;Tb927.4.4440:mRNA-p1;Tb927.4.4470:mRNA-p1;Tb927.4.4460:mRNA-p1	Tb927.6.390	adenylyl cyclase, pseudogene	GRESAG	0	0	0	0	1;1;1;1;1;1;1;1;1;1;1;1;1;1	1;1;1;1;1;1;1;1;1;1;1;1;1;1	1;1;1;1;1;1;1;1;1;1;1;1;1;1	14	1	1	1	0	0	0	0	0	1	0	0	0	0	0	1	0	0	0	0	0	1	2.2	2.2	2.2	36.399	323	323;1196;1197;1198;1198;1238;1243;1243;1243;1243;1244;1247;1271;1288	0.0024272	1.7022	0	0	0	0	0	2.2	10500000
	Tb927.5.3400:mRNA-p1	Tb927.5.3400:mRNA-p1	Tb927.5.3400	calcium-translocating P-type ATPase, calcium pump	Ions	0	0	0	0	11	11	11	1	11	11	11	0	0	0	0	9	4	0	0	0	0	9	4	0	0	0	0	9	4	13.3	13.3	13.3	110.32	1011	1011	0	23.744	0	0	0	0	11.2	3.9	436000000
	Tb927.2.2520:mRNA-p1;Tb927.2.2510:mRNA-p1	Tb927.2.2520:mRNA-p1;Tb927.2.2510:mRNA-p1	Tb927.2.2520	Mitochondrial outer membrane protein porin 2	Ions	0	0	0	0	5;5	5;5	5;5	2	5	5	5	0	0	0	0	3	4	0	0	0	0	3	4	0	0	0	0	3	4	16.3	16.3	16.3	29.189	270	270;270	0	45.444	0	0	0	0	12.2	12.2	605000000
	Tb927.10.12500:mRNA-p1;Tb927.10.12510:mRNA-p1	Tb927.10.12500:mRNA-p1;Tb927.10.12510:mRNA-p1	Tb927.10.12500	P-type H -ATPase, putative	Ions	0	0	0	0	4;4	4;4	4;4	2	4	4	4	0	0	0	0	4	0	0	0	0	0	4	0	0	0	0	0	4	0	4.1	4.1	4.1	100.23	912	912;920	0	9.0929	0	0	0	0	4.1	0	88400000
	Tb927.9.15460:mRNA-p1	Tb927.9.15460:mRNA-p1	Tb927.9.15460	calcium motive p-type ATPase, putative	Ions	0	0	0	0	2	2	2	1	2	2	2	0	0	0	0	2	0	0	0	0	0	2	0	0	0	0	0	2	0	1.9	1.9	1.9	113.97	1041	1041	0	3.7788	0	0	0	0	1.9	0	29300000
	Tb927.8.650:mRNA-p1	Tb927.8.650:mRNA-p1	Tb927.8.650	cation-transporting ATPase, putative	Ions	0	0	0	0	2	2	2	1	2	2	2	0	0	0	1	2	0	0	0	0	1	2	0	0	0	0	1	2	0	1.7	1.7	1.7	140.4	1261	1261	0	3.856	0	0	0	0.6	1.7	0	96000000
	Tb927.9.4210:mRNA-p1;Tb927.9.4230:mRNA-p1;Tb11.v5.0561.1-p1;Tb927.9.4200:mRNA-p1	Tb927.9.4210:mRNA-p1;Tb927.9.4230:mRNA-p1;Tb11.v5.0561.1-p1	Tb927.9.4210	fatty acyl CoA synthetase 3 (ACS3)	Lipids	0	2	1	1	19;16;13;5	19;16;13;5	19;16;13;5	4	19	19	19	2	1	0	3	14	16	2	1	0	3	14	16	2	1	0	3	14	16	33.2	33.2	33.2	77.853	702	702;702;403;708	0	134.74	3.7	2.3	0	6.8	27.1	28.6	2770000000
+	Tb927.8.7100:mRNA-p1	Tb927.8.7100:mRNA-p1	Tb927.8.7100	acetyl-CoA carboxylase, putative	Lipids	0	0	1	1	13	13	13	1	13	13	13	0	0	0	3	9	3	0	0	0	3	9	3	0	0	0	3	9	3	6.9	6.9	6.9	242.91	2181	2181	0	37.172	0	0	0	2.2	4.5	1.5	232000000
	Tb927.9.4190:mRNA-p1	Tb927.9.4190:mRNA-p1	Tb927.9.4190	fatty acyl CoA syntetase 1 (ACS1)	Lipids	0	0	0	1	7	7	7	1	7	7	7	0	0	0	1	5	4	0	0	0	1	5	4	0	0	0	1	5	4	10.2	10.2	10.2	78.959	698	698	0	33.831	0	0	0	1.4	7	6	429000000
	Tb927.10.3260:mRNA-p1;Tb11.v5.0825.1-p1	Tb927.10.3260:mRNA-p1	Tb927.10.3260	Long-chain-fatty-acid--CoA ligase 5, Acyl-CoA synthetase 5 (LACS 5)	Lipids	0	0	0	0	7;2	7;2	7;2	2	7	7	7	0	0	0	0	5	4	0	0	0	0	5	4	0	0	0	0	5	4	13.1	13.1	13.1	78.983	703	703;289	0	14.978	0	0	0	0	10	6.4	263000000
	Tb927.8.2540:mRNA-p1	Tb927.8.2540:mRNA-p1	Tb927.8.2540	3-ketoacyl-CoA thiolase, putative	Lipids	0	0	0	0	5	5	5	1	5	5	5	0	0	0	0	2	4	0	0	0	0	2	4	0	0	0	0	2	4	14.6	14.6	14.6	46.244	438	438	0	55.742	0	0	0	0	9.1	9.6	162000000
	Tb927.11.6390:mRNA-p1	Tb927.11.6390:mRNA-p1	Tb927.11.6390	hypothetical protein, conserved, START domain, possible phoshatidylcholine transfer protein	Lipids	0	0	0	0	5	5	5	1	5	5	5	0	0	0	0	3	3	0	0	0	0	3	3	0	0	0	0	3	3	18.5	18.5	18.5	32.852	292	292	0	5.696	0	0	0	0	12	9.2	71000000
	Tb927.2.3080:mRNA-p1	Tb927.2.3080:mRNA-p1	Tb927.2.3080	fatty acid desaturase, putative,oleate desaturase, putative	Lipids	0	0	0	0	4	4	4	1	4	4	4	0	0	0	0	4	0	0	0	0	0	4	0	0	0	0	0	4	0	11.8	11.8	11.8	47.078	408	408	0	5.197	0	0	0	0	11.8	0	61700000
	Tb927.8.6390:mRNA-p1	Tb927.8.6390:mRNA-p1	Tb927.8.6390	lysophospholipase, putative,alpha/beta hydrolase, putative (TbLysoPLA)	Lipids	0	0	0	0	3	3	3	1	3	3	3	0	0	0	0	1	2	0	0	0	0	1	2	0	0	0	0	1	2	11.4	11.4	11.4	30.092	280	280	0	10.675	0	0	0	0	3.6	7.9	44500000
	Tb927.1.4830:mRNA-p1	Tb927.1.4830:mRNA-p1	Tb927.1.4830	Phospholipase A1	Lipids	0	0	0	0	3	3	3	1	3	3	3	0	0	0	0	0	3	0	0	0	0	0	3	0	0	0	0	0	3	11.7	11.7	11.7	32.404	300	300	0	10.655	0	0	0	0	0	11.7	64500000
	Tb927.6.1500:mRNA-p1	Tb927.6.1500:mRNA-p1	Tb927.6.1500	1-Alkyl-dihydroxyacetonephosphate synthase	Lipids	0	0	0	0	2	2	2	1	2	2	2	0	0	0	0	1	1	0	0	0	0	1	1	0	0	0	0	1	1	3.1	3.1	3.1	69.067	613	613	0.0013106	2.0613	0	0	0	0	1.8	1.3	8440000
	Tb927.1.4490:mRNA-p1	Tb927.1.4490:mRNA-p1	Tb927.1.4490	acetyltransferase, putative	Lipids	0	0	0	0	2	2	2	1	2	2	2	0	0	0	0	2	1	0	0	0	0	2	1	0	0	0	0	2	1	14.5	14.5	14.5	19.682	172	172	0	26.463	0	0	0	0	14.5	7.6	159000000
	Tb927.7.4180:mRNA-p1	Tb927.7.4180:mRNA-p1	Tb927.7.4180	Elongase 3	Lipids	0	0	0	0	2	2	2	1	2	2	2	0	0	0	0	2	1	0	0	0	0	2	1	0	0	0	0	2	1	3.9	3.9	3.9	33.87	305	305	0	5.2748	0	0	0	0	3.9	3.6	503000000
	Tb927.11.2090:mRNA-p1	Tb927.11.2090:mRNA-p1	Tb927.11.2090	choline kinase (EK1)	Lipids	0	1	0	0	2	2	2	1	2	2	2	0	0	1	0	0	2	0	0	1	0	0	2	0	0	1	0	0	2	3.9	3.9	3.9	49.158	431	431	0	2.2301	0	0	2.1	0	0	3.9	66400000
	Tb927.3.4820:mRNA-p1	Tb927.3.4820:mRNA-p1	Tb927.3.4820	acyltransferase, putative	Lipids	0	0	0	0	1	1	1	1	1	1	1	0	0	0	0	1	0	0	0	0	0	1	0	0	0	0	0	1	0	3.3	3.3	3.3	34.629	305	305	0.0024213	1.6847	0	0	0	0	3.3	0	6770000
	Tb927.10.8900:mRNA-p1	Tb927.10.8900:mRNA-p1	Tb927.10.8900	choline/ethanolamine phosphotransferase (CEPT)	Lipids	0	0	0	0	1	1	1	1	1	1	1	0	0	0	0	1	0	0	0	0	0	1	0	0	0	0	0	1	0	2.1	2.1	2.1	47.976	432	432	0.0087336	1.1684	0	0	0	0	2.1	0	15000000
	Tb927.10.12810:mRNA-p1	Tb927.10.12810:mRNA-p1	Tb927.10.12810	cholinephosphate cytidylyltransferase A, putative	Lipids	0	0	0	0	1	1	1	1	1	1	1	0	0	0	0	1	0	0	0	0	0	1	0	0	0	0	0	1	0	1.6	1.6	1.6	56.299	506	506	0.0056948	1.3348	0	0	0	0	1.6	0	22600000
	Tb927.2.4130:mRNA-p1	Tb927.2.4130:mRNA-p1	Tb927.2.4130	enoyl-CoA hydratase/Enoyl-CoA isomerase/3-hydroxyacyl-CoA dehydrogenase, putative	Lipids	0	0	0	0	1	1	1	1	1	1	1	0	0	0	0	1	0	0	0	0	0	1	0	0	0	0	0	1	0	1.2	1.2	1.2	88.9	803	803	0	2.7294	0	0	0	0	1.2	0	23200000
	Tb927.11.16480:mRNA-p1	Tb927.11.16480:mRNA-p1	Tb927.11.16480	enoyl-CoA hydratase/isomerase family protein, putative	Lipids	0	0	0	0	1	1	1	1	1	1	1	0	0	0	0	0	1	0	0	0	0	0	1	0	0	0	0	0	1	1.9	1.9	1.9	40.234	362	362	0.0057537	1.412	0	0	0	0	0	1.9	19700000
	Tb927.4.4740:mRNA-p1	Tb927.4.4740:mRNA-p1	Tb927.4.4740	ER to golgi transport of GPI proteins OR Dihydroceramide synthase)	Lipids	0	0	0	0	1	1	1	1	1	1	1	0	0	0	0	1	0	0	0	0	0	1	0	0	0	0	0	1	0	3.2	3.2	3.2	45.288	400	400	0	2.4999	0	0	0	0	3.2	0	24300000
	Tb927.9.12700:mRNA-p1	Tb927.9.12700:mRNA-p1	Tb927.9.12700	phospholipase A1, putative flippase	Lipids	0	0	0	0	1	1	1	1	1	1	1	0	0	0	0	1	0	0	0	0	0	1	0	0	0	0	0	1	0	2.9	2.9	2.9	49.911	447	447	0	6.9168	0	0	0	0	2.9	0	0
	Tb927.11.16880:mRNA-p1	Tb927.11.16880:mRNA-p1	Tb927.11.16880	leucine-rich repeat protein (LRRP)	LRRP	0	1	0	0	2	2	2	1	2	2	2	1	0	0	0	0	1	1	0	0	0	0	1	1	0	0	0	0	1	5.4	5.4	5.4	70.687	628	628	0.0035587	1.5985	4.1	0	0	0	0	1.3	7860000
	Tb927.11.11690:mRNA-p1	Tb927.11.11690:mRNA-p1	Tb927.11.11690	Vacuolar proton pump subunit B, putative	Lysosome	0	0	0	0	14	14	14	1	14	14	14	0	0	0	0	8	12	0	0	0	0	8	12	0	0	0	0	8	12	35.4	35.4	35.4	55.619	495	495	0	42.655	0	0	0	0	22.2	31.1	988000000
	Tb927.5.1300:mRNA-p1	Tb927.5.1300:mRNA-p1	Tb927.5.1300	vacuolar proton translocating ATPase subunit A, putative	Lysosome	0	0	0	0	6	6	6	1	6	6	6	0	0	0	0	5	1	0	0	0	0	5	1	0	0	0	0	5	1	9.2	9.2	9.2	89.63	783	783	0	19.971	0	0	0	0	7.9	1.3	121000000
	Tb927.10.6780:mRNA-p1	Tb927.10.6780:mRNA-p1	Tb927.10.6780	vacuolar protein sorting-associated protein 45, putative (VPS45)	Lysosome	0	0	0	0	5	5	5	1	5	5	5	0	0	0	0	3	2	0	0	0	0	3	2	0	0	0	0	3	2	9.3	9.3	9.3	64.974	589	589	0	9.9393	0	0	0	0	4.8	4.6	64700000
	Tb927.8.1200:mRNA-p1;Tb927.8.1160:mRNA-p1;Tb927.8.1180:mRNA-p1	Tb927.8.1200:mRNA-p1;Tb927.8.1160:mRNA-p1;Tb927.8.1180:mRNA-p1	Tb927.8.1200	vacuolar-type Ca2 -ATPase 2 (TbA2)	Lysosome	0	0	0	0	3;3;3	3;3;3	3;3;3	3	3	3	3	0	0	0	0	3	0	0	0	0	0	3	0	0	0	0	0	3	0	3.8	3.8	3.8	119	1080	1080;1102;1106	0	15.178	0	0	0	0	3.8	0	105000000
	Tb927.10.3760:mRNA-p1	Tb927.10.3760:mRNA-p1	Tb927.10.3760	vacuolar ATP synthase subunit d, putative	Lysosome	0	0	0	0	2	2	2	1	2	2	2	0	0	0	0	1	1	0	0	0	0	1	1	0	0	0	0	1	1	5.3	5.3	5.3	31.285	283	283	0.0036101	1.6539	0	0	0	0	2.5	2.8	27100000
	Tb927.5.1810:mRNA-p1;Tb927.5.1830:mRNA-p1	Tb927.5.1810:mRNA-p1;Tb927.5.1830:mRNA-p1	Tb927.5.1810	lysosomal/endosomal membrane protein p67 (p67)	Lysosome	0	0	0	0	1;1	1;1	1;1	2	1	1	1	0	0	0	0	1	1	0	0	0	0	1	1	0	0	0	0	1	1	2	2	2	72.732	659	659;661	0	2.706	0	0	0	0	2	2	67300000
	Tb927.8.2100:mRNA-p1	Tb927.8.2100:mRNA-p1	Tb927.8.2100	vacuolar ATP synthase 16 kDa proteolipid subunit, putative	Lysosome	0	0	0	0	1	1	1	1	1	1	1	0	0	0	0	1	0	0	0	0	0	1	0	0	0	0	0	1	0	9.1	9.1	9.1	16.868	165	165	0	4.3644	0	0	0	0	9.1	0	15800000
	Tb927.10.200:mRNA-p1	Tb927.10.200:mRNA-p1	Tb927.10.200	vacuolar ATP synthase, putative	Lysosome	0	0	0	0	1	1	1	1	1	1	1	0	0	0	0	1	1	0	0	0	0	1	1	0	0	0	0	1	1	7.9	7.9	7.9	19.38	191	191	0	7.3264	0	0	0	0	7.9	7.9	75900000
	Tb927.11.10010:mRNA-p1	Tb927.11.10010:mRNA-p1	Tb927.11.10010	vacuolar sorting-associated protein-like, putative	Lysosome	0	0	0	0	1	1	1	1	1	1	1	0	0	0	0	0	1	0	0	0	0	0	1	0	0	0	0	0	1	2.2	2.2	2.2	41.363	357	357	0.0035419	1.5492	0	0	0	0	0	2.2	23400000
	Tb927.3.5530:mRNA-p1;Tb927.11.15490:mRNA-p1;Tb927.7.7400:mRNA-p1	Tb927.3.5530:mRNA-p1	Tb927.3.5530	Tb-292 membrane associated protein	Membrane.protein	0	1	0	0	7;1;1	7;1;1	7;1;1	3	7	7	7	0	0	1	1	5	0	0	0	1	1	5	0	0	0	1	1	5	0	16.3	16.3	16.3	279.19	2463	2463;718;2197	0	26.365	0	0	13	0.4	2.9	0	87800000
	Tb927.5.390:mRNA-p1;Tb927.5.370:mRNA-p1;Tb927.5.360:mRNA-p1;Tb11.v5.0231.1-p1;Tb11.v5.0230.1-p1;Tb11.v5.0228.1-p1;Tb927.5.400:mRNA-p1;Tb927.5.350:mRNA-p1;Tb11.v5.0552.1-p1;Tb11.v5.0421.1-p1;Tb11.v5.0227.1-p1	Tb927.5.390:mRNA-p1;Tb927.5.370:mRNA-p1;Tb927.5.360:mRNA-p1;Tb11.v5.0231.1-p1;Tb11.v5.0230.1-p1;Tb11.v5.0228.1-p1;Tb927.5.400:mRNA-p1;Tb927.5.350:mRNA-p1;Tb11.v5.0552.1-p1;Tb11.v5.0421.1-p1;Tb11.v5.0227.1-p1	Tb927.5.390	75 kDa invariant surface glycoprotein (ISG75)	Membrane.protein	0	0	0	0	2;2;2;2;2;2;1;1;1;1;1	2;2;2;2;2;2;1;1;1;1;1	2;2;2;2;2;2;1;1;1;1;1	11	2	2	2	0	0	0	0	0	2	0	0	0	0	0	2	0	0	0	0	0	2	3.4	3.4	3.4	57.736	522	522;523;523;523;523;523;522;522;522;522;522	0	4.1131	0	0	0	0	0	3.4	26300000
	Tb927.9.9660:mRNA-p1	Tb927.9.9660:mRNA-p1	Tb927.9.9660	ATOM40	Mito.biogenesis	0	0	0	0	4	4	4	1	4	4	4	0	0	0	0	2	2	0	0	0	0	2	2	0	0	0	0	2	2	12	12	12	38.295	351	351	0	7.3928	0	0	0	0	5.7	6.3	80600000
	Tb927.11.11460:mRNA-p1	Tb927.11.11460:mRNA-p1	Tb927.11.11460	ATOM69 - POMP9	Mito.biogenesis	0	0	0	0	2	2	2	1	2	2	2	0	0	0	0	1	1	0	0	0	0	1	1	0	0	0	0	1	1	4.5	4.5	4.5	68.998	623	623	0.0013193	2.1466	0	0	0	0	2.9	1.6	85600000
	Tb927.10.6510:mRNA-p1;Tb927.10.6400:mRNA-p1	Tb927.10.6510:mRNA-p1;Tb927.10.6400:mRNA-p1	Tb927.10.6510	chaperonin HSP60, mitochondrial precursor	Mito.biogenesis	0	0	0	0	2;2	2;2	2;2	2	2	2	2	0	0	0	0	0	2	0	0	0	0	0	2	0	0	0	0	0	2	5.9	5.9	5.9	59.503	562	562;562	0	5.917	0	0	0	0	0	5.9	38300000
	Tb927.7.5700:mRNA-p1	Tb927.7.5700:mRNA-p1	Tb927.7.5700	ATOM36	Mito.biogenesis	0	0	0	0	1	1	1	1	1	1	1	0	0	0	0	1	0	0	0	0	0	1	0	0	0	0	0	1	0	2.8	2.8	2.8	35.717	320	320	0.0012837	1.9926	0	0	0	0	2.8	0	17000000
	Tb927.11.7780:mRNA-p1	Tb927.11.7780:mRNA-p1	Tb927.11.7780	ATOM46	Mito.biogenesis	0	0	0	0	1	1	1	1	1	1	1	0	0	0	0	1	0	0	0	0	0	1	0	0	0	0	0	1	0	2.6	2.6	2.6	46.237	419	419	0.0077778	1.2199	0	0	0	0	2.6	0	17600000
	Tb927.9.11220:mRNA-p1	Tb927.9.11220:mRNA-p1	Tb927.9.11220	TIM42	Mito.biogenesis	0	0	0	0	1	1	1	1	1	1	1	0	0	0	0	0	1	0	0	0	0	0	1	0	0	0	0	0	1	2	2	2	41.551	356	356	0.0035377	1.536	0	0	0	0	0	2	7680000
	Tb927.8.4150:mRNA-p1	Tb927.8.4150:mRNA-p1	Tb927.8.4150	TimRhomII	Mito.biogenesis	0	0	0	0	1	1	1	1	1	1	1	0	0	0	0	0	1	0	0	0	0	0	1	0	0	0	0	0	1	4	4	4	33.246	300	300	0.0035842	1.6313	0	0	0	0	0	4	30500000
	Tb927.9.5900:mRNA-p1	Tb927.9.5900:mRNA-p1	Tb927.9.5900	glutamate dehydrogenase (GDH)	Mito.citric.acid.cycle	0	0	0	0	5	5	5	1	5	5	5	0	0	0	0	4	2	0	0	0	0	4	2	0	0	0	0	4	2	5.9	5.9	5.9	112.11	992	992	0	13.707	0	0	0	0	5.2	1.7	128000000
	Tb927.11.16730:mRNA-p1	Tb927.11.16730:mRNA-p1	Tb927.11.16730	dihydrolipoyl dehydrogenase (GCVL-2)	Mito.citric.acid.cycle	0	0	0	0	1	1	1	1	1	1	1	0	0	0	0	0	1	0	0	0	0	0	1	0	0	0	0	0	1	2.7	2.7	2.7	50.433	477	477	0	16.531	0	0	0	0	0	2.7	30100000
	Tb927.7.7430:mRNA-p1;Tb927.7.7420:mRNA-p1	Tb927.7.7430:mRNA-p1;Tb927.7.7420:mRNA-p1	Tb927.7.7430	ATP synthase F1, alpha subunit (ATPF1A)	Mito.e.transport	0	0	0	1	8;8	8;8	8;8	2	8	8	8	0	0	0	1	7	3	0	0	0	1	7	3	0	0	0	1	7	3	15.2	15.2	15.2	63.502	584	584;584	0	73.199	0	0	0	2.1	13.7	4.1	676000000
	Tb927.10.730:mRNA-p1;Tb11.v5.0822.1-p1	Tb927.10.730:mRNA-p1;Tb11.v5.0822.1-p1	Tb927.10.730	ATP synthase, putative	Mito.e.transport	0	0	0	0	3;3	3;3	3;3	2	3	3	3	0	0	0	1	3	0	0	0	0	1	3	0	0	0	0	1	3	0	6	6	6	52.901	468	468;499	0	10.207	0	0	0	3	6	0	137000000
	Tb927.10.9440:mRNA-p1	Tb927.10.9440:mRNA-p1	Tb927.10.9440	NADH dehydrogenase (54 NDH2) in TAO/G3PDH complex	Mito.e.transport	0	0	0	0	3	3	3	1	3	3	3	0	0	0	0	2	2	0	0	0	0	2	2	0	0	0	0	2	2	6.9	6.9	6.9	54.351	491	491	0	3.663	0	0	0	0	5.3	3.9	133000000
	Tb927.10.180:mRNA-p1	Tb927.10.180:mRNA-p1	Tb927.10.180	ATP synthase F1 subunit gamma protein, putative (ATPF1G)	Mito.e.transport	0	0	0	0	1	1	1	1	1	1	1	0	0	0	0	0	1	0	0	0	0	0	1	0	0	0	0	0	1	2.6	2.6	2.6	34.37	305	305	0.0012469	1.8405	0	0	0	0	0	2.6	19500000
	Tb927.4.1540:mRNA-p1	Tb927.4.1540:mRNA-p1	Tb927.4.1540	POMP27, NAD-dependent epimerase, aldehyde reductase, one putative TM domain	Mito.membrane	0	0	0	0	9	9	9	1	9	9	9	0	0	0	0	8	1	0	0	0	0	8	1	0	0	0	0	8	1	24	24	24	55.24	508	508	0	56.986	0	0	0	0	21.1	3	341000000
	Tb927.11.13180:mRNA-p1	Tb927.11.13180:mRNA-p1	Tb927.11.13180	POMP10	Mito.membrane	0	0	0	0	3	3	3	1	3	3	3	0	0	0	0	2	2	0	0	0	0	2	2	0	0	0	0	2	2	9.1	9.1	9.1	61.21	560	560	0	13.469	0	0	0	0	7.7	6.4	265000000
	Tb927.6.4180:mRNA-p1	Tb927.6.4180:mRNA-p1	Tb927.6.4180	POMP32	Mito.membrane	0	0	0	0	2	2	2	1	2	2	2	0	0	0	0	2	1	0	0	0	0	2	1	0	0	0	0	2	1	12.1	12.1	12.1	16.327	149	149	0.001297	2.0396	0	0	0	0	12.1	7.4	44800000
	Tb927.3.3130:mRNA-p1	Tb927.3.3130:mRNA-p1	Tb927.3.3130	POMP24	Mito.membrane	0	0	0	0	1	1	1	1	1	1	1	0	0	0	0	1	0	0	0	0	0	1	0	0	0	0	0	1	0	0.7	0.7	0.7	178.08	1642	1642	0	3.1525	0	0	0	0	0.7	0	12300000
	Tb927.10.3210:mRNA-p1	Tb927.10.3210:mRNA-p1	Tb927.10.3210	delta-1-pyrroline-5-carboxylate dehydrogenase, putative	Mito.pathway	0	0	0	0	11	11	11	1	11	11	11	0	0	0	0	5	7	0	0	0	0	5	7	0	0	0	0	5	7	22.1	22.1	22.1	62.036	561	561	0	36.585	0	0	0	0	11.1	13.2	541000000
	Tb927.11.5440:mRNA-p1	Tb927.11.5440:mRNA-p1	Tb927.11.5440	malic enzyme	Mito.pathway	0	0	0	0	5	5	5	1	5	5	5	0	0	0	0	1	4	0	0	0	0	1	4	0	0	0	0	1	4	7.6	7.6	7.6	61.506	564	564	0	6.1594	0	0	0	0	1.6	6	130000000
	Tb927.8.6060:mRNA-p1	Tb927.8.6060:mRNA-p1	Tb927.8.6060	2-amino-3-ketobutyrate coenzyme A ligase, putative	Mito.pathway	0	0	0	0	4	4	4	1	4	4	4	0	0	0	0	2	2	0	0	0	0	2	2	0	0	0	0	2	2	14.1	14.1	14.1	43.734	404	404	0	12.985	0	0	0	0	7.9	6.2	65900000
	Tb927.10.9970:mRNA-p1	Tb927.10.9970:mRNA-p1	Tb927.10.9970	hypothetical protein, conserved	Mito.pathway	0	0	0	0	3	3	3	1	3	3	3	0	0	0	0	3	0	0	0	0	0	3	0	0	0	0	0	3	0	2.6	2.6	2.6	110	1024	1024	0	2.4404	0	0	0	0	2.6	0	40900000
	Tb927.4.600:mRNA-p1	Tb927.4.600:mRNA-p1	Tb927.4.600	Alpha/beta hydrolase family, putative	Mito.pathway	0	0	0	0	1	1	1	1	1	1	1	0	0	0	0	0	1	0	0	0	0	0	1	0	0	0	0	0	1	5	5	5	34.458	317	317	0	4.4121	0	0	0	0	0	5	11200000
	Tb927.1.3950:mRNA-p1	Tb927.1.3950:mRNA-p1	Tb927.1.3950	D-alanine aminotransferase (ALAT)	Mito.pathway	0	0	0	0	1	1	1	1	1	1	1	0	0	0	0	0	1	0	0	0	0	0	1	0	0	0	0	0	1	3.4	3.4	3.4	55.704	504	504	0	3.6548	0	0	0	0	0	3.4	18900000
	Tb927.10.7610:mRNA-p1	Tb927.10.7610:mRNA-p1	Tb927.10.7610	hypothetical protein, conserved	Mito.pathway	0	0	0	0	1	1	1	1	1	1	1	0	0	0	0	0	1	0	0	0	0	0	1	0	0	0	0	0	1	1.3	1.3	1.3	165.1	1432	1432	0	2.53	0	0	0	0	0	1.3	27300000
	Tb927.11.1400:mRNA-p1	Tb927.11.1400:mRNA-p1	Tb927.11.1400	hypothetical protein, conserved	Mito.pathway	0	0	0	0	1	1	1	1	1	1	1	0	0	0	0	1	0	0	0	0	0	1	0	0	0	0	0	1	0	1.3	1.3	1.3	94.046	845	845	0	2.2428	0	0	0	0	1.3	0	0
	Tb927.11.1620:mRNA-p1	Tb927.11.1620:mRNA-p1	Tb927.11.1620	hypothetical protein, conserved	Mito.pathway	0	0	0	0	1	1	1	1	1	1	1	0	0	0	0	1	0	0	0	0	0	1	0	0	0	0	0	1	0	8.9	8.9	8.9	21.598	192	192	0	3.5489	0	0	0	0	8.9	0	15900000
	Tb927.10.5790:mRNA-p1	Tb927.10.5790:mRNA-p1	Tb927.10.5790	hypothetical protein, conserved	Mito.pathway	0	0	0	0	1	1	1	1	1	1	1	0	0	0	0	1	0	0	0	0	0	1	0	0	0	0	0	1	0	1.9	1.9	1.9	59.193	536	536	0.0047114	1.5238	0	0	0	0	1.9	0	16500000
	Tb927.7.3810:mRNA-p1	Tb927.7.3810:mRNA-p1	Tb927.7.3810	hypothetical protein, conserved, , 2 Cold-shock domains	Mito.pathway	0	0	0	0	1	1	1	1	1	1	1	0	0	0	0	1	0	0	0	0	0	1	0	0	0	0	0	1	0	2.9	2.9	2.9	41.685	381	381	0	2.7238	0	0	0	0	2.9	0	0
	Tb927.3.4920:mRNA-p1	Tb927.3.4920:mRNA-p1	Tb927.3.4920	LETM1 and EF-hand domain-containing protein 1, inner mitochondrial membrane?	Mito.pathway	0	0	0	0	1	1	1	1	1	1	1	0	0	0	0	1	0	0	0	0	0	1	0	0	0	0	0	1	0	3.4	3.4	3.4	42.737	378	378	0.0012392	1.8095	0	0	0	0	3.4	0	13400000
	Tb927.8.6800:mRNA-p1	Tb927.8.6800:mRNA-p1	Tb927.8.6800	hypothetical protein, conserved	Mito.pathway	0	1	0	0	1	1	1	1	1	1	1	0	0	1	0	1	1	0	0	1	0	1	1	0	0	1	0	1	1	2.5	2.5	2.5	57.207	516	516	0.0024691	1.7806	0	0	2.5	0	2.5	2.5	8690000000
+	Tb927.3.1590:mRNA-p1	Tb927.3.1590:mRNA-p1	Tb927.3.1590	mitochondrial RNA binding complex 1 subunit (MRB1590)	Mito.RNA	0	1	1	1	13	13	13	1	13	13	13	1	0	0	7	7	7	1	0	0	7	7	7	1	0	0	7	7	7	26.8	26.8	26.8	72.678	668	668	0	152.71	1.3	0	0	14.1	16.8	13.2	823000000
	Tb927.11.13280:mRNA-p1	Tb927.11.13280:mRNA-p1	Tb927.11.13280	mitochondrial RNA binding protein 2 (GBP25)	Mito.RNA	0	0	0	0	5	5	5	1	5	5	5	0	0	0	0	4	1	0	0	0	0	4	1	0	0	0	0	4	1	22.3	22.3	22.3	25.106	224	224	0	8.3449	0	0	0	0	17.9	4.5	192000000
	Tb927.4.4160:mRNA-p1	Tb927.4.4160:mRNA-p1	Tb927.4.4160	REMC5 mitochondrial RNA binding protein MRB4160 MRB complex component	Mito.RNA	0	0	0	0	5	5	3	1	5	5	3	0	0	0	0	4	1	0	0	0	0	4	1	0	0	0	0	2	1	5.8	5.8	4.1	100.4	896	896	0	20.867	0	0	0	0	4.2	1.6	135000000
	Tb927.11.7900:mRNA-p1	Tb927.11.7900:mRNA-p1	Tb927.11.7900	mitochondrial RNA binding protein 16 (RBP16)	Mito.RNA	0	0	0	0	4	4	4	1	4	4	4	0	0	0	0	3	2	0	0	0	0	3	2	0	0	0	0	3	2	31.2	31.2	31.2	15.118	141	141	0	49.679	0	0	0	0	31.2	24.1	166000000
	Tb927.8.8170:mRNA-p1	Tb927.8.8170:mRNA-p1	Tb927.8.8170	REMC5A mitochondrial RNA binding protein 1, putative (MRB8170)	Mito.RNA	0	0	0	0	4	2	2	1	4	2	2	0	0	0	0	4	0	0	0	0	0	2	0	0	0	0	0	2	0	3.4	1.8	1.8	100.4	905	905	0	2.9594	0	0	0	0	3.4	0	39300000
	Tb927.2.6070:mRNA-p1	Tb927.2.6070:mRNA-p1	Tb927.2.6070	mitochondrial RNA binding complex 1 subunit (MRB6070)	Mito.RNA	0	1	0	0	3	3	3	1	3	3	3	0	0	1	0	3	1	0	0	1	0	3	1	0	0	1	0	3	1	13	13	13	31.486	285	285	0	12.432	0	0	4.9	0	13	2.8	254000000
	Tb927.10.10830:mRNA-p1	Tb927.10.10830:mRNA-p1	Tb927.10.10830	RGG2, MRB complex component	Mito.RNA	0	1	0	0	3	3	3	1	3	3	3	0	1	0	0	3	1	0	1	0	0	3	1	0	1	0	0	3	1	19.7	19.7	19.7	32.404	320	320	0	16.756	0	4.1	0	0	19.7	4.1	328000000
	Tb927.11.1710:mRNA-p1	Tb927.11.1710:mRNA-p1	Tb927.11.1710	mitochondrial RNA binding protein 1,gBP21, MRP1 (GBP21)	Mito.RNA	0	0	0	0	2	2	2	1	2	2	2	0	0	0	0	1	1	0	0	0	0	1	1	0	0	0	0	1	1	13.6	13.6	13.6	23.253	206	206	0	2.8086	0	0	0	0	6.3	7.3	46600000
+	Tb927.4.1800:mRNA-p1;Tb927.4.1790:mRNA-p1	Tb927.4.1800:mRNA-p1;Tb927.4.1790:mRNA-p1	Tb927.4.1800	Mitochondrial ribosomal protein L3	Mito.translation	0	0	1	1	14;14	14;14	14;14	2	14	14	14	0	0	0	3	13	6	0	0	0	3	13	6	0	0	0	3	13	6	34	34	34	48.691	429	429;429	0	91.039	0	0	0	8.2	31.9	13.8	3360000000
	Tb927.10.14840:mRNA-p1;Tb927.10.14830:mRNA-p1;Tb927.10.14820:mRNA-p1	Tb927.10.14840:mRNA-p1;Tb927.10.14830:mRNA-p1;Tb927.10.14820:mRNA-p1	Tb927.10.14840	mitochondrial carrier protein, MCP5c ATP/ADP carrier	Mito.transport	0	0	0	1	9;9;9	9;9;9	9;9;9	3	9	9	9	0	0	0	1	8	2	0	0	0	1	8	2	0	0	0	1	8	2	31.9	31.9	31.9	34.074	307	307;307;307	0	72.338	0	0	0	3.9	29	5.5	1350000000
	Tb927.9.10310:mRNA-p1	Tb927.9.10310:mRNA-p1	Tb927.9.10310	mitochondrial carrier protein, MCP11, phosphate	Mito.transport	0	0	0	0	5	5	5	1	5	5	5	0	0	0	0	3	3	0	0	0	0	3	3	0	0	0	0	3	3	18.3	18.3	18.3	34.295	317	317	0	5.1159	0	0	0	0	10.7	10.7	339000000
	Tb927.10.12840:mRNA-p1	Tb927.10.12840:mRNA-p1	Tb927.10.12840	mitochondrial carrier protein, MCP12, dicarboxylates & tricarboxylates	Mito.transport	0	0	0	0	3	3	3	1	3	3	3	0	0	0	0	2	1	0	0	0	0	2	1	0	0	0	0	2	1	11.8	11.8	11.8	33.131	304	304	0	12.424	0	0	0	0	9.2	2.6	155000000
	Tb927.11.14360:mRNA-p1	Tb927.11.14360:mRNA-p1	Tb927.11.14360	mitochondrial carrier protein, MCP2	Mito.transport	0	0	0	0	3	3	3	1	3	3	3	0	0	0	0	3	0	0	0	0	0	3	0	0	0	0	0	3	0	9.1	9.1	9.1	38.053	339	339	0	4.053	0	0	0	0	9.1	0	49900000
	Tb927.11.5290:mRNA-p1	Tb927.11.5290:mRNA-p1	Tb927.11.5290	mitochondrial carrier protein, MCP9	Mito.transport	0	0	0	0	3	3	3	1	3	3	3	0	0	0	0	3	0	0	0	0	0	3	0	0	0	0	0	3	0	7.4	7.4	7.4	29.883	282	282	0	2.7802	0	0	0	0	7.4	0	27700000
	Tb927.2.2970:mRNA-p1	Tb927.2.2970:mRNA-p1	Tb927.2.2970	mitochondrial carrier protein, MCP13	Mito.transport	0	0	0	0	2	2	2	1	2	2	2	0	0	0	0	2	0	0	0	0	0	2	0	0	0	0	0	2	0	9.3	9.3	9.3	33.962	312	312	0	17.13	0	0	0	0	9.3	0	13400000
	Tb927.10.2240:mRNA-p1	Tb927.10.2240:mRNA-p1	Tb927.10.2240	NTF2-like domain, in Y14 TAP	Nuclear.transport	0	3	1	1	26	26	26	1	26	26	26	3	2	0	5	16	16	3	2	0	5	16	16	3	2	0	5	16	16	44	44	44	66.352	588	588	0	154.4	8	6	0	11.6	34.2	29.4	3020000000
	Tb927.3.1120:mRNA-p1	Tb927.3.1120:mRNA-p1	Tb927.3.1120	Ran or RTB2	Nuclear.transport	0	2	0	0	12	12	12	1	12	12	12	0	1	2	0	9	9	0	1	2	0	9	9	0	1	2	0	9	9	53.9	53.9	53.9	24.406	217	217	0	77.203	0	8.3	12.4	0	50.2	41.9	1570000000
	Tb927.10.9650:mRNA-p1;Tb11.v5.0399.1-p1	Tb927.10.9650:mRNA-p1;Tb11.v5.0399.1-p1	Tb927.10.9650	TbNup152 Outer ring	Nuclear.transport	0	0	0	0	4;2	4;2	4;2	2	4	4	4	0	0	0	1	3	0	0	0	0	1	3	0	0	0	0	1	3	0	4.1	4.1	4.1	152.97	1406	1406;1122	0	4.2421	0	0	0	1.4	2.8	0	39600000
	Tb927.10.7060:mRNA-p1	Tb927.10.7060:mRNA-p1	Tb927.10.7060	TbNup96 Inner ring	Nuclear.transport	0	0	0	0	4	4	4	1	4	4	4	0	0	0	0	4	0	0	0	0	0	4	0	0	0	0	0	4	0	6.8	6.8	6.8	96.511	883	883	0	28.794	0	0	0	0	6.8	0	64100000
	Tb11.v5.0837.1-p1;Tb927.10.2900:mRNA-p1	Tb11.v5.0837.1-p1;Tb927.10.2900:mRNA-p1	Tb927.10.2900	importin beta-1 subunit, putative	Nuclear.transport	0	0	0	0	3;3	3;3	3;3	2	3	3	3	0	0	0	0	1	2	0	0	0	0	1	2	0	0	0	0	1	2	4.5	4.5	4.5	63.469	575	575;866	0	2.8219	0	0	0	0	1.6	3	52000000
	Tb927.9.14240:mRNA-p1;Tb11.v5.0621.1-p1	Tb927.9.14240:mRNA-p1	Tb927.9.14240	TbNup82 Outer ring	Nuclear.transport	0	0	0	0	3;1	3;1	3;1	2	3	3	3	0	0	0	0	3	0	0	0	0	0	3	0	0	0	0	0	3	0	5.5	5.5	5.5	82.445	752	752;697	0	4.2006	0	0	0	0	5.5	0	89600000
	Tb11.v5.0827.1-p1;Tb927.2.4230:mRNA-p1	Tb11.v5.0827.1-p1;Tb927.2.4230:mRNA-p1	Tb927.2.4230	Nucleoporin NUP-1 protein, putative	Nuclear.transport	0	1	0	0	3;3	3;3	3;3	2	3	3	3	1	0	0	3	0	0	1	0	0	3	0	0	1	0	0	3	0	0	22.2	22.2	22.2	75.242	676	676;3647	0	115.83	4.4	0	0	22.2	0	0	27300000
	Tb927.6.4740:mRNA-p1	Tb927.6.4740:mRNA-p1	Tb927.6.4740	importin-alpha re-exporter protein, putative	Nuclear.transport	0	0	0	0	2	2	2	1	2	2	2	0	0	0	0	2	0	0	0	0	0	2	0	0	0	0	0	2	0	2.3	2.3	2.3	106.58	960	960	0	2.2871	0	0	0	0	2.3	0	51700000
	Tb927.7.2300:mRNA-p1	Tb927.7.2300:mRNA-p1	Tb927.7.2300	TbNup132 Outer ring	Nuclear.transport	0	0	0	0	2	2	2	1	2	2	2	0	0	0	0	1	1	0	0	0	0	1	1	0	0	0	0	1	1	1.5	1.5	1.5	132.36	1203	1203	0.00125	1.8597	0	0	0	0	0.8	0.7	24000000
	Tb927.10.8170:mRNA-p1	Tb927.10.8170:mRNA-p1	Tb927.10.8170	TbNup144 Outer-inner connect	Nuclear.transport	0	0	0	0	2	2	2	1	2	2	2	0	0	0	0	0	2	0	0	0	0	0	2	0	0	0	0	0	2	1.9	1.9	1.9	144.37	1325	1325	0	4.5938	0	0	0	0	0	1.9	20700000
	Tb927.11.980:mRNA-p1	Tb927.11.980:mRNA-p1	Tb927.11.980	TbNup158 Outer ring, FG Nup facing both sides	Nuclear.transport	0	0	0	0	2	2	2	1	2	2	2	0	0	0	0	2	2	0	0	0	0	2	2	0	0	0	0	2	2	1.5	1.5	1.5	158.38	1553	1553	0	5.8607	0	0	0	0	1.5	1.5	64500000
	Tb927.4.2880:mRNA-p1	Tb927.4.2880:mRNA-p1	Tb927.4.2880	TbNup225 Inner ring	Nuclear.transport	0	0	0	0	2	2	2	1	2	2	2	0	0	0	0	2	0	0	0	0	0	2	0	0	0	0	0	2	0	1.2	1.2	1.2	225.59	2070	2070	0	4.3625	0	0	0	0	1.2	0	19300000
	Tb927.11.2950:mRNA-p1	Tb927.11.2950:mRNA-p1	Tb927.11.2950	TbNup89 Outer ring	Nuclear.transport	0	0	0	0	2	2	2	1	2	2	2	0	0	0	0	2	0	0	0	0	0	2	0	0	0	0	0	2	0	3.5	3.5	3.5	89.154	796	796	0	6.8284	0	0	0	0	3.5	0	55000000
	Tb927.10.14180:mRNA-p1	Tb927.10.14180:mRNA-p1	Tb927.10.14180	TbSec13 Outer ring nucleoporin	Nuclear.transport	0	0	0	0	2	2	2	1	2	2	2	0	0	0	0	1	1	0	0	0	0	1	1	0	0	0	0	1	1	5.1	5.1	5.1	41.675	374	374	0	2.9871	0	0	0	0	2.1	2.9	29000000
	Tb927.9.3760:mRNA-p1	Tb927.9.3760:mRNA-p1	Tb927.9.3760	poly(A) export protein, putative (TbGLE2)	Nuclear.transport	0	0	0	0	1	1	1	1	1	1	1	0	0	0	0	1	0	0	0	0	0	1	0	0	0	0	0	1	0	3.4	3.4	3.4	38.351	349	349	0	3.7851	0	0	0	0	3.4	0	0
	Tb927.11.15990:mRNA-p1	Tb927.11.15990:mRNA-p1	Tb927.11.15990	TbNup109 Outer ring	Nuclear.transport	0	0	0	0	1	1	1	1	1	1	1	0	0	0	0	0	1	0	0	0	0	0	1	0	0	0	0	0	1	1.7	1.7	1.7	108.72	1001	1001	0.005787	1.4403	0	0	0	0	0	1.7	9160000
	Tb927.11.9780:mRNA-p1	Tb927.11.9780:mRNA-p1	Tb927.11.9780	TbNup119 Outer-inner connect	Nuclear.transport	0	0	0	0	1	1	1	1	1	1	1	0	0	0	0	1	0	0	0	0	0	1	0	0	0	0	0	1	0	1.3	1.3	1.3	118.85	1077	1077	0	3.0108	0	0	0	0	1.3	0	13200000
	Tb927.11.4540:mRNA-p1	Tb927.11.4540:mRNA-p1	Tb927.11.4540	TbNup48 Connect to basket	Nuclear.transport	0	0	0	0	1	1	1	1	1	1	1	0	0	0	0	1	0	0	0	0	0	1	0	0	0	0	0	1	0	3.3	3.3	3.3	48.494	453	453	0.006772	1.266	0	0	0	0	3.3	0	20400000
	Tb927.11.3650:mRNA-p1;Tb11.v5.0435.1-p1	Tb927.11.3650:mRNA-p1;Tb11.v5.0435.1-p1	Tb927.11.3650	adenylosuccinate synthetase, putative	Nucleotides	0	1	0	0	23;23	23;23	23;23	2	23	23	23	0	1	0	0	17	16	0	1	0	0	17	16	0	1	0	0	17	16	43	43	43	66.674	602	602;602	0	191.37	0	2.5	0	0	31.7	29.2	2440000000
	Tb927.5.4560:mRNA-p1;Tb11.v5.0409.1-p1;Tb05.5K5.200:mRNA-p1	Tb927.5.4560:mRNA-p1;Tb11.v5.0409.1-p1;Tb05.5K5.200:mRNA-p1	Tb927.5.4560	guanine deaminase, putative	Nucleotides	0	2	0	1	11;11;11	11;11;11	11;11;11	3	11	11	11	0	2	0	1	6	7	0	2	0	1	6	7	0	2	0	1	6	7	26.6	26.6	26.6	55.321	516	516;516;516	0	94.745	0	6.2	0	3.9	18.2	17.8	577000000
	Tb927.5.3810:mRNA-p1	Tb927.5.3810:mRNA-p1	Tb927.5.3810	orotidine-5-phosphate decarboxylase/orotate phosphoribosyltransferase, OMPDCase-OPRTase	Nucleotides	0	0	0	0	7	7	7	1	7	7	7	0	0	0	0	3	4	0	0	0	0	3	4	0	0	0	0	3	4	18.3	18.3	18.3	49.955	458	458	0	24.386	0	0	0	0	6.3	12	160000000
	Tb927.8.4430:mRNA-p1	Tb927.8.4430:mRNA-p1	Tb927.8.4430	uridine phosphorylase	Nucleotides	0	0	0	0	7	7	7	1	7	7	7	0	0	0	0	4	5	0	0	0	0	4	5	0	0	0	0	4	5	23.2	23.2	23.2	36.925	341	341	0	15.287	0	0	0	0	18.5	12.9	224000000
	Tb927.10.1390:mRNA-p1	Tb927.10.1390:mRNA-p1	Tb927.10.1390	hypoxanthine-guanine phosphoribosyltransferase, putative	Nucleotides	0	0	0	0	6	6	6	1	6	6	6	0	0	0	0	3	5	0	0	0	0	3	5	0	0	0	0	3	5	32.1	32.1	32.1	26.36	234	234	0	25.436	0	0	0	0	16.2	27.4	368000000
	Tb927.6.2360:mRNA-p1;Tb927.6.2300:mRNA-p1	Tb927.6.2360:mRNA-p1;Tb927.6.2300:mRNA-p1	Tb927.6.2360	adenosine kinase, putative	Nucleotides	0	0	0	0	5;4	5;4	5;4	2	5	5	5	0	0	0	0	2	4	0	0	0	0	2	4	0	0	0	0	2	4	17.4	17.4	17.4	37.958	345	345;345	0	11.83	0	0	0	0	7.8	12.2	312000000
	Tb927.9.7180:mRNA-p1	Tb927.9.7180:mRNA-p1	Tb927.9.7180	adenosine monophosphate deaminase, putative,AMP deaminase, putative	Nucleotides	0	0	0	0	3	3	3	1	3	3	3	0	0	0	0	1	2	0	0	0	0	1	2	0	0	0	0	1	2	2.3	2.3	2.3	189.71	1690	1690	0	7.0618	0	0	0	0	1.3	1	43100000
	Tb927.3.2960:mRNA-p1	Tb927.3.2960:mRNA-p1	Tb927.3.2960	inosine-adenosine-guanosine-nucleosidehydrolase (IAGNH)	Nucleotides	0	0	0	0	3	3	3	1	3	3	3	0	0	0	0	2	2	0	0	0	0	2	2	0	0	0	0	2	2	11	11	11	35.848	327	327	0	15.373	0	0	0	0	6.4	7	69800000
	Tb927.11.16130:mRNA-p1	Tb927.11.16130:mRNA-p1	Tb927.11.16130	nucleoside diphosphate kinase (NDPK)	Nucleotides	0	0	0	0	3	3	3	1	3	3	3	0	0	0	0	1	2	0	0	0	0	1	2	0	0	0	0	1	2	24.8	24.8	24.8	16.857	153	153	0	10.63	0	0	0	0	7.8	17	134000000
	Tb927.11.7840:mRNA-p1	Tb927.11.7840:mRNA-p1	Tb927.11.7840	ribonucleoside-diphosphate reductase large chain (RNR1)	Nucleotides	0	0	0	0	3	3	3	1	3	3	3	0	0	0	0	1	2	0	0	0	0	1	2	0	0	0	0	1	2	2.9	2.9	2.9	94.606	838	838	0	4.5923	0	0	0	0	1.3	2.9	32900000
	Tb927.11.12820:mRNA-p1;Tb927.11.12810:mRNA-p1;Tb927.11.12800:mRNA-p1;Tb927.11.12790:mRNA-p1;Tb927.11.12780.1-p1;Tb11.v5.0288.1-p1	Tb927.11.12820:mRNA-p1;Tb927.11.12810:mRNA-p1;Tb927.11.12800:mRNA-p1;Tb927.11.12790:mRNA-p1;Tb927.11.12780.1-p1;Tb11.v5.0288.1-p1	Tb927.11.12820	ribonucleoside-diphosphate reductase small chain (RNR2)	Nucleotides	0	0	0	0	3;3;3;3;3;3	3;3;3;3;3;3	3;3;3;3;3;3	6	3	3	3	0	0	0	0	1	3	0	0	0	0	1	3	0	0	0	0	1	3	10.7	10.7	10.7	39.314	337	337;337;337;337;337;337	0	10.194	0	0	0	0	3	10.7	137000000
	Tb927.1.1240:mRNA-p1;Tb11.v5.0356.1-p1	Tb927.1.1240:mRNA-p1;Tb11.v5.0356.1-p1	Tb927.1.1240	CTP synthase	Nucleotides	0	1	0	0	3;3	3;3	3;3	2	3	3	3	1	0	0	0	0	2	1	0	0	0	0	2	1	0	0	0	0	2	8.3	8.3	8.3	65.212	589	589;589	0	3.0488	5.3	0	0	0	0	3.1	50000000
	Tb927.2.6220:mRNA-p1;Tb927.2.6320:mRNA-p1;Tb927.2.6240:mRNA-p1;Tb927.2.6200:mRNA-p1;Tb927.2.6280:mRNA-p1	Tb927.2.6220:mRNA-p1;Tb927.2.6320:mRNA-p1;Tb927.2.6240:mRNA-p1;Tb927.2.6200:mRNA-p1;Tb927.2.6280:mRNA-p1	Tb927.2.6220	adenosine transporter 2, putative (TbNT4)	Nucleotides	0	0	0	0	2;1;1;1;1	2;1;1;1;1	2;1;1;1;1	5	2	2	2	0	0	0	0	2	0	0	0	0	0	2	0	0	0	0	0	2	0	4.3	4.3	4.3	51.226	462	462;462;463;464;466	0	2.5262	0	0	0	0	4.3	0	37700000
	Tb927.5.3820:mRNA-p1	Tb927.5.3820:mRNA-p1	Tb927.5.3820	aspartate carbamoyltransferase, putative	Nucleotides	0	0	0	0	2	2	2	1	2	2	2	0	0	0	0	1	1	0	0	0	0	1	1	0	0	0	0	1	1	7.6	7.6	7.6	35.91	327	327	0	5.3974	0	0	0	0	3.7	4	41300000
	Tb927.5.2080:mRNA-p1	Tb927.5.2080:mRNA-p1	Tb927.5.2080	guanosine monophosphate reductase, putative	Nucleotides	0	0	0	0	2	2	2	1	2	2	2	0	0	0	0	1	1	0	0	0	0	1	1	0	0	0	0	1	1	3.7	3.7	3.7	52.238	491	491	0.0024361	1.7367	0	0	0	0	1.8	1.8	42000000
	Tb927.10.16120:mRNA-p1	Tb927.10.16120:mRNA-p1	Tb927.10.16120	inosine-5'-monophosphate dehydrogenase,IMP dehydrogenase	Nucleotides	0	0	0	0	2	2	2	1	2	2	2	0	0	0	0	1	1	0	0	0	0	1	1	0	0	0	0	1	1	5.9	5.9	5.9	55.694	512	512	0	7.8712	0	0	0	0	3.5	2.3	78800000
	Tb927.7.4570:mRNA-p1;Tb11.v5.0270.1-p1	Tb927.7.4570:mRNA-p1;Tb11.v5.0270.1-p1	Tb927.7.4570	inosine-guanine nucleoside hydrolase (IG-NH)	Nucleotides	0	0	0	0	2;2	2;2	2;2	2	2	2	2	0	0	0	0	1	1	0	0	0	0	1	1	0	0	0	0	1	1	5.9	5.9	5.9	39.39	357	357;357	0	3.3375	0	0	0	0	3.6	2.2	27300000
	Tb927.7.1780:mRNA-p1	Tb927.7.1780:mRNA-p1	Tb927.7.1780	Adenine phosphoribosyltransferase, putative	Nucleotides	0	0	0	0	1	1	1	1	1	1	1	0	0	0	0	0	1	0	0	0	0	0	1	0	0	0	0	0	1	6.4	6.4	6.4	25.973	235	235	0	4.1423	0	0	0	0	0	6.4	32600000
	Tb927.9.7550:mRNA-p1	Tb927.9.7550:mRNA-p1	Tb927.9.7550	adenylosuccinate lyase, putative	Nucleotides	0	0	0	0	1	1	1	1	1	1	1	0	0	0	0	0	1	0	0	0	0	0	1	0	0	0	0	0	1	3	3	3	53.119	471	471	0	2.2306	0	0	0	0	0	3	6060000
	Tb927.9.9740:mRNA-p1	Tb927.9.9740:mRNA-p1	Tb927.9.9740	AMP deaminase, putative	Nucleotides	0	0	0	0	1	1	1	1	1	1	1	0	0	0	0	1	0	0	0	0	0	1	0	0	0	0	0	1	0	1	1	1	163.28	1417	1417	0	2.3797	0	0	0	0	1	0	12600000
	Tb927.11.15750:mRNA-p1	Tb927.11.15750:mRNA-p1	Tb927.11.15750	AMP deaminase, putative	Nucleotides	0	0	0	0	1	1	1	1	1	1	1	0	0	0	0	1	0	0	0	0	0	1	0	0	0	0	0	1	0	1.2	1.2	1.2	163.21	1417	1417	0	14.702	0	0	0	0	1.2	0	18000000
	Tb927.7.2100:mRNA-p1	Tb927.7.2100:mRNA-p1	Tb927.7.2100	GMP synthase	Nucleotides	0	0	0	0	1	1	1	1	1	1	1	0	0	0	0	1	0	0	0	0	0	1	0	0	0	0	0	1	0	1.8	1.8	1.8	71.794	658	658	1	-2	0	0	0	0	1.8	0	13600000
	Tb927.5.3170:mRNA-p1	Tb927.5.3170:mRNA-p1	Tb927.5.3170	ribose-phosphate pyrophosphokinase, putative (PRPS5)	PPP	0	0	0	0	8	8	8	1	8	8	8	0	0	0	0	7	3	0	0	0	0	7	3	0	0	0	0	7	3	13.3	13.3	13.3	73.305	653	653	0	22.709	0	0	0	0	13.3	4.7	214000000
	Tb927.11.3030:mRNA-p1	Tb927.11.3030:mRNA-p1	Tb927.11.3030	phosphoribosylpyrophosphate synthetase, putative (PRS)	PPP	0	0	0	0	6	6	6	1	6	6	6	0	0	0	0	2	5	0	0	0	0	2	5	0	0	0	0	2	5	24.4	24.4	24.4	39.402	356	356	0	28.856	0	0	0	0	8.1	21.1	246000000
	Tb927.11.8970:mRNA-p1	Tb927.11.8970:mRNA-p1	Tb927.11.8970	ribose 5-phosphate isomerase, putative	PPP	0	0	0	0	3	3	3	1	3	3	3	0	0	0	0	2	2	0	0	0	0	2	2	0	0	0	0	2	2	24.5	24.5	24.5	16.957	155	155	0	7.2918	0	0	0	0	16.8	12.9	386000000
	Tb927.9.12110:mRNA-p1	Tb927.9.12110:mRNA-p1	Tb927.9.12110	6-phosphogluconate dehydrogenase, decarboxylating (gnD)	PPP	0	0	0	0	2	2	2	1	2	2	2	0	0	0	0	0	2	0	0	0	0	0	2	0	0	0	0	0	2	6.1	6.1	6.1	52.165	479	479	0	12.535	0	0	0	0	0	6.1	44000000
	Tb927.11.1020:mRNA-p1	Tb927.11.1020:mRNA-p1	Tb927.11.1020	ribokinase, putative	PPP	0	0	0	0	2	2	2	1	2	2	2	0	0	0	0	1	1	0	0	0	0	1	1	0	0	0	0	1	1	8.4	8.4	8.4	35.288	333	333	0	4.1209	0	0	0	0	5.4	3	36800000
	Tb927.5.2960:mRNA-p1	Tb927.5.2960:mRNA-p1	Tb927.5.2960	phosphoribosylpyrophosphate synthetase, putative (PRS)	PPP	0	0	0	0	1	1	1	1	1	1	1	0	0	0	0	0	1	0	0	0	0	0	1	0	0	0	0	0	1	4.4	4.4	4.4	41.855	386	386	0	19.095	0	0	0	0	0	4.4	2390000
	Tb927.8.8330:mRNA-p1;Tb927.4.3950:mRNA-p1	Tb927.8.8330:mRNA-p1	Tb927.8.8330	calpain, putative,cysteine peptidase, putative	Protease	0	3	1	1	20;6	20;6	20;6	2	20	20	20	3	1	0	8	15	9	3	1	0	8	15	9	3	1	0	8	15	9	26.7	26.7	26.7	98.456	888	888;853	0	144.41	4.8	1.9	0	11.6	22.5	10.6	3170000000
	Tb927.11.3570:mRNA-p1	Tb927.11.3570:mRNA-p1	Tb927.11.3570	aminopeptidase, putative,metallo-peptidase, Clan MA(E) Family M1	Protease	0	0	0	0	16	16	16	1	16	16	16	0	0	0	0	9	10	0	0	0	0	9	10	0	0	0	0	9	10	21.2	21.2	21.2	98.098	871	871	0	68.786	0	0	0	0	10.1	15.2	544000000
	Tb927.3.4790:mRNA-p1;Tb927.3.4750:mRNA-p1	Tb927.3.4790:mRNA-p1;Tb927.3.4750:mRNA-p1	Tb927.3.4790	aminopeptidase, putative,metallo-peptidase, Clan MA(E) Family M1	Protease	0	0	0	1	12;12	12;12	12;12	2	12	12	12	0	0	0	1	11	5	0	0	0	1	11	5	0	0	0	1	11	5	14.7	14.7	14.7	97.251	871	871;871	0	49.75	0	0	0	1.4	12.7	6.9	757000000
	Tb927.9.8950:mRNA-p1	Tb927.9.8950:mRNA-p1	Tb927.9.8950	CAAX prenyl protease 1, putative,metallo- peptidase, Clan M- Family M48	Protease	0	0	0	1	7	7	7	1	7	7	7	0	0	0	1	6	1	0	0	0	1	6	1	0	0	0	1	6	1	17.8	17.8	17.8	48.904	427	427	0	20.987	0	0	0	3	14.8	3	397000000
	Tb927.11.12850:mRNA-p1	Tb927.11.12850:mRNA-p1	Tb927.11.12850	oligopeptidase b (OPB)	Protease	0	0	0	0	6	6	6	1	6	6	6	0	0	0	0	5	1	0	0	0	0	5	1	0	0	0	0	5	1	11.7	11.7	11.7	80.572	715	715	0	11.536	0	0	0	0	10.2	1.5	191000000
	Tb927.10.8020:mRNA-p1	Tb927.10.8020:mRNA-p1	Tb927.10.8020	prolyl endopeptidase (POP)	Protease	0	0	0	0	6	6	6	1	6	6	6	0	0	0	0	6	1	0	0	0	0	6	1	0	0	0	0	6	1	8	8	8	77.624	698	698	0	8.4454	0	0	0	0	8	1.3	184000000
	Tb927.10.14790:mRNA-p1	Tb927.10.14790:mRNA-p1	Tb927.10.14790	aminopeptidase, putative,metallo-peptidase, Clan MG, Family M24	Protease	0	0	0	0	5	5	5	1	5	5	5	0	0	0	0	3	4	0	0	0	0	3	4	0	0	0	0	3	4	12.8	12.8	12.8	42.69	382	382	0	8.1504	0	0	0	0	6	10.7	256000000
	Tb927.10.6970:mRNA-p1;Tb927.10.6940:mRNA-p1	Tb927.10.6970:mRNA-p1;Tb927.10.6940:mRNA-p1	Tb927.10.6970	dipeptidyl-peptidase 8-like serine peptidase,serine peptidase, Clan SC, Family S9B	Protease	0	0	0	0	4;4	4;4	4;4	2	4	4	4	0	0	0	0	4	2	0	0	0	0	4	2	0	0	0	0	4	2	6.1	6.1	6.1	93.683	850	850;850	0	7.9309	0	0	0	0	6.1	2.7	142000000
	Tb927.5.2700:mRNA-p1	Tb927.5.2700:mRNA-p1	Tb927.5.2700	otubain cysteine peptidase, Clan CA, family C65, putative	Protease	0	0	0	0	3	3	3	1	3	3	3	0	0	0	0	1	2	0	0	0	0	1	2	0	0	0	0	1	2	10.4	10.4	10.4	30.443	268	268	0	3.7577	0	0	0	0	3.4	7.1	58700000
	Tb927.8.7020:mRNA-p1	Tb927.8.7020:mRNA-p1	Tb927.8.7020	peptidase, putative	Protease	0	0	0	0	3	3	3	1	3	3	3	0	0	0	0	2	1	0	0	0	0	2	1	0	0	0	0	2	1	3.5	3.5	3.5	118.86	1064	1064	0	4.0877	0	0	0	0	2.7	0.8	63200000
	Tb927.11.2470:mRNA-p1	Tb927.11.2470:mRNA-p1	Tb927.11.2470	aminopeptidase, putative,metallo-peptidase, Clan MF, Family M17	Protease	0	0	0	0	2	2	2	1	2	2	2	0	0	0	0	0	2	0	0	0	0	0	2	0	0	0	0	0	2	3.5	3.5	3.5	60.585	565	565	0	3.3987	0	0	0	0	0	3.5	0
	Tb927.10.1890:mRNA-p1	Tb927.10.1890:mRNA-p1	Tb927.10.1890	calpain, putative,cysteine peptidase, Clan CA, family C2, putative	Protease	0	0	0	0	2	2	2	1	2	2	2	0	0	0	0	1	1	0	0	0	0	1	1	0	0	0	0	1	1	1.4	1.4	1.4	178.09	1594	1594	0	2.426	0	0	0	0	0.5	0.9	15800000
	Tb927.9.13490:mRNA-p1	Tb927.9.13490:mRNA-p1	Tb927.9.13490	aminopeptidase P, putative,metallo-peptidase, Clan MG, Family M24	Protease	0	0	0	0	1	1	1	1	1	1	1	0	0	0	0	1	1	0	0	0	0	1	1	0	0	0	0	1	1	1.4	1.4	1.4	54.408	489	489	0.0056561	1.2759	0	0	0	0	1.4	1.4	44000000
	Tb927.3.3410:mRNA-p1	Tb927.3.3410:mRNA-p1	Tb927.3.3410	aspartyl aminopeptidase, putative,metallo-peptidase, Clan MH, Family M20	Protease	0	0	0	0	1	1	1	1	1	1	1	0	0	0	0	0	1	0	0	0	0	0	1	0	0	0	0	0	1	2.9	2.9	2.9	49.327	451	451	0	2.2392	0	0	0	0	0	2.9	16000000
	Tb927.1.2100:mRNA-p1	Tb927.1.2100:mRNA-p1	Tb927.1.2100	calpain-like cysteine peptidase, putative,cysteine peptidase, Clan CA, family C2, putative	Protease	0	0	0	0	1	1	1	1	1	1	1	0	0	0	0	1	0	0	0	0	0	1	0	0	0	0	0	1	0	1.3	1.3	1.3	126.15	1146	1146	0	2.3735	0	0	0	0	1.3	0	26900000
	Tb927.1.2120:mRNA-p1	Tb927.1.2120:mRNA-p1	Tb927.1.2120	calpain, putative,cysteine peptidase, Clan CA, family C2, putative	Protease	0	0	0	0	1	1	1	1	1	1	1	0	0	0	0	1	0	0	0	0	0	1	0	0	0	0	0	1	0	1.1	1.1	1.1	82.62	732	732	0.0036232	1.659	0	0	0	0	1.1	0	0
	Tb927.4.1840:mRNA-p1	Tb927.4.1840:mRNA-p1	Tb927.4.1840	Carboxypeptidase Nna1-like protein, putative	Protease	0	0	0	0	1	1	1	1	1	1	1	0	0	0	0	0	1	0	0	0	0	0	1	0	0	0	0	0	1	1.3	1.3	1.3	84.264	773	773	0	3.3582	0	0	0	0	0	1.3	7280000
	Tb927.9.14220:mRNA-p1	Tb927.9.14220:mRNA-p1	Tb927.9.14220	metacaspase MCA5	Protease	0	0	0	0	1	1	1	1	1	1	1	0	0	0	1	1	0	0	0	0	1	1	0	0	0	0	1	1	0	5.2	5.2	5.2	55.442	500	500	0	4.1788	0	0	0	5.2	5.2	0	13500000
	Tb927.8.1810:mRNA-p1	Tb927.8.1810:mRNA-p1	Tb927.8.1810	rhomboid-like protein	Protease	0	0	0	0	1	1	1	1	1	1	1	0	0	0	0	1	0	0	0	0	0	1	0	0	0	0	0	1	0	3.2	3.2	3.2	32.595	312	312	0.0012706	1.9536	0	0	0	0	3.2	0	32500000
	Tb927.5.800:mRNA-p1;Tb927.5.790:mRNA-p1;Tb927.3.1630:mRNA-p1	Tb927.5.800:mRNA-p1	Tb927.5.800	CK1.2 casein kinase 1	Protein.kinase	0	0	0	0	19;6;1	19;6;1	19;6;1	3	19	19	19	0	0	0	0	12	10	0	0	0	0	12	10	0	0	0	0	12	10	50.6	50.6	50.6	38.374	332	332;330;400	0	95.33	0	0	0	0	41.3	29.8	977000000
	Tb927.11.4610:mRNA-p1;Tb11.v5.0587.1-p1	Tb927.11.4610:mRNA-p1;Tb11.v5.0587.1-p1	Tb927.11.4610	protein kinase A regulatory subunit (PKA-R)	Protein.kinase	0	0	0	1	16;16	16;16	16;16	2	16	16	16	0	0	0	1	14	6	0	0	0	1	14	6	0	0	0	1	14	6	38.3	38.3	38.3	56.734	499	499;499	0	146.4	0	0	0	3.2	31.5	15.6	1310000000
	Tb927.10.5140:mRNA-p1	Tb927.10.5140:mRNA-p1	Tb927.10.5140	protein kinase, putative,mitogen-activated protein kinase 2, putative	Protein.kinase	0	0	0	0	12	12	12	1	12	12	12	0	0	0	0	10	5	0	0	0	0	10	5	0	0	0	0	10	5	32.1	32.1	32.1	49.74	442	442	0	41.092	0	0	0	0	28.7	13.8	539000000
	Tb927.10.14770:mRNA-p1	Tb927.10.14770:mRNA-p1	Tb927.10.14770	AKB1 protein kinase	Protein.kinase	0	0	0	0	5	5	5	1	5	5	5	0	0	0	0	5	1	0	0	0	0	5	1	0	0	0	0	5	1	10.8	10.8	10.8	70.531	640	640	0	16.591	0	0	0	0	10.8	2.2	231000000
	Tb927.3.3190:mRNA-p1	Tb927.3.3190:mRNA-p1	Tb927.3.3190	NEK7 protein kinase	Protein.kinase	0	0	0	0	4	4	4	1	4	4	4	0	0	0	0	2	2	0	0	0	0	2	2	0	0	0	0	2	2	9.5	9.5	9.5	56.152	503	503	0	9.735	0	0	0	0	6.2	3.4	117000000
	Tb927.9.6560:mRNA-p1	Tb927.9.6560:mRNA-p1	Tb927.9.6560	protein kinase, putative	Protein.kinase	0	0	0	0	4	4	4	1	4	4	4	0	0	0	0	3	2	0	0	0	0	3	2	0	0	0	0	3	2	9.6	9.6	9.6	80.198	726	726	0	14.816	0	0	0	0	7.3	4.1	127000000
	Tb927.9.11100:mRNA-p1;Tb927.9.11030:mRNA-p1	Tb927.9.11100:mRNA-p1;Tb927.9.11030:mRNA-p1	Tb927.9.11100	PKAC1 protein kinase A catalytic subunit isoform 1	Protein.kinase	0	0	0	0	2;1	2;1	2;1	2	2	2	2	0	0	0	0	1	1	0	0	0	0	1	1	0	0	0	0	1	1	8.1	8.1	8.1	38.039	334	334;336	0	6.5401	0	0	0	0	3	5.1	27500000
	Tb927.10.13010:mRNA-p1;Tb11.v5.0671.1-p1	Tb927.10.13010:mRNA-p1;Tb11.v5.0671.1-p1	Tb927.10.13010	protein kinase A catalytic subunit 3(PKAC3)	Protein.kinase	0	0	0	0	2;2	2;2	2;2	2	2	2	2	0	0	0	0	0	2	0	0	0	0	0	2	0	0	0	0	0	2	5.6	5.6	5.6	39.183	337	337;337	0	3.3332	0	0	0	0	0	5.6	14800000
	Tb927.6.2250:mRNA-p1	Tb927.6.2250:mRNA-p1	Tb927.6.2250	RAC serine-threonine kinase	Protein.kinase	0	0	0	0	2	2	2	1	2	2	2	0	0	0	0	1	1	0	0	0	0	1	1	0	0	0	0	1	1	7.6	7.6	7.6	51.889	458	458	0	12.474	0	0	0	0	3.1	4.6	101000000
	Tb927.10.7780:mRNA-p1	Tb927.10.7780:mRNA-p1	Tb927.10.7780	KFR1 protein kinase	Protein.kinase	0	0	0	0	1	1	1	1	1	1	1	0	0	0	0	1	0	0	0	0	0	1	0	0	0	0	0	1	0	3.1	3.1	3.1	39.358	350	350	0.0046404	1.4632	0	0	0	0	3.1	0	7520000
	Tb927.4.5310:mRNA-p1	Tb927.4.5310:mRNA-p1	Tb927.4.5310	NEK12.3 protein kinase (RDK2)	Protein.kinase	0	0	0	0	1	1	1	1	1	1	1	0	0	0	0	1	0	0	0	0	0	1	0	0	0	0	0	1	0	3	3	3	50.193	440	440	0	4.1487	0	0	0	0	3	0	20200000
	Tb927.7.940:mRNA-p1	Tb927.7.940:mRNA-p1	Tb927.7.940	protein kinase C substrate protein, heavy chain, putative,glucosidase II beta subunit, putative	Protein.kinase	0	0	0	0	1	1	1	1	1	1	1	0	0	0	0	1	0	0	0	0	0	1	0	0	0	0	0	1	0	1.9	1.9	1.9	54.435	481	481	0.0057274	1.3756	0	0	0	0	1.9	0	0
	Tb927.11.10820:mRNA-p1	Tb927.11.10820:mRNA-p1	Tb927.11.10820	protein kinase ck2 regulatory subunit beta, putative	Protein.kinase	0	0	0	0	1	1	1	1	1	1	1	0	0	0	0	1	0	0	0	0	0	1	0	0	0	0	0	1	0	5.4	5.4	5.4	33.52	294	294	0	3.6067	0	0	0	0	5.4	0	20200000
	Tb927.11.9190:mRNA-p1	Tb927.11.9190:mRNA-p1	Tb927.11.9190	protein kinase, putative	Protein.kinase	0	0	0	0	1	1	1	1	1	1	1	0	0	0	0	1	0	0	0	0	0	1	0	0	0	0	0	1	0	0.7	0.7	0.7	150.6	1370	1370	0	3.2414	0	0	0	0	0.7	0	5420000
	Tb927.6.1800:mRNA-p1	Tb927.6.1800:mRNA-p1	Tb927.6.1800	protein phosphatase 2C, putative	Protein.phosphatase	0	0	0	0	6	6	6	1	6	6	6	0	0	0	0	4	4	0	0	0	0	4	4	0	0	0	0	4	4	20.7	20.7	20.7	41.135	382	382	0	25.174	0	0	0	0	14.9	12.6	223000000
	Tb927.5.4380:mRNA-p1;Tb05.5K5.30:mRNA-p1	Tb927.5.4380:mRNA-p1;Tb05.5K5.30:mRNA-p1	Tb927.5.4380	KPP1 kinetoplastid-specific phospho-protein phosphatase	Protein.phosphatase	0	0	0	0	5;5	5;5	5;5	2	5	5	5	0	0	0	0	4	2	0	0	0	0	4	2	0	0	0	0	4	2	8.8	8.8	8.8	71.37	636	636;636	0	13.828	0	0	0	0	7.1	4.1	158000000
	Tb927.4.3640:mRNA-p1;Tb927.4.3630:mRNA-p1;Tb927.4.3620:mRNA-p1	Tb927.4.3640:mRNA-p1;Tb927.4.3630:mRNA-p1;Tb927.4.3620:mRNA-p1	Tb927.4.3640	protein phosphatase 1, putative	Protein.phosphatase	0	0	0	0	3;3;3	3;3;3	3;3;3	3	3	3	3	0	0	0	0	1	3	0	0	0	0	1	3	0	0	0	0	1	3	8.2	8.2	8.2	33.577	294	294;294;294	0	5.3643	0	0	0	0	2.4	8.2	47500000
	Tb927.11.16970:mRNA-p1	Tb927.11.16970:mRNA-p1	Tb927.11.16970	protein phosphatase 4, putative	Protein.phosphatase	0	0	0	0	3	3	3	1	3	3	3	0	0	0	0	2	1	0	0	0	0	2	1	0	0	0	0	2	1	12.5	12.5	12.5	34.432	303	303	0	4.9325	0	0	0	0	8.6	4	59900000
	Tb927.10.4180:mRNA-p1	Tb927.10.4180:mRNA-p1	Tb927.10.4180	TFIIF-stimulated CTD phosphatase, putative	Protein.phosphatase	0	0	0	0	2	2	2	1	2	2	2	0	0	0	0	0	2	0	0	0	0	0	2	0	0	0	0	0	2	6.1	6.1	6.1	28.189	247	247	0	2.6779	0	0	0	0	0	6.1	32400000
	Tb927.8.3410:mRNA-p1	Tb927.8.3410:mRNA-p1	Tb927.8.3410	Possible protein tyrosine phosphatase	Protein.phosphatase	0	0	0	0	1	1	1	1	1	1	1	0	0	0	0	1	0	0	0	0	0	1	0	0	0	0	0	1	0	0.9	0.9	0.9	170.41	1518	1518	0.00358	1.6302	0	0	0	0	0.9	0	8850000
	Tb927.3.3780:mRNA-p1;Tb927.3.3760:mRNA-p1	Tb927.3.3780:mRNA-p1;Tb927.3.3760:mRNA-p1	Tb927.3.3780	tryparedoxin	Redox	0	0	0	0	8;8	8;8	8;8	2	8	8	8	0	0	0	0	5	4	0	0	0	0	5	4	0	0	0	0	5	4	52.1	52.1	52.1	15.891	144	144;144	0	18.602	0	0	0	0	30.6	29.9	703000000
	Tb927.8.1990:mRNA-p1	Tb927.8.1990:mRNA-p1	Tb927.8.1990	mitochondrial peroxiredoxin (TRYP2)	Redox	0	0	0	0	6	6	6	1	6	6	6	0	0	0	0	6	3	0	0	0	0	6	3	0	0	0	0	6	3	31.9	31.9	31.9	25.631	226	226	0	22.018	0	0	0	0	31.9	11.9	1100000000
	Tb927.10.10390:mRNA-p1	Tb927.10.10390:mRNA-p1	Tb927.10.10390	trypanothione reductase	Redox	0	0	0	0	6	6	6	1	6	6	6	0	0	0	0	2	5	0	0	0	0	2	5	0	0	0	0	2	5	14.4	14.4	14.4	53.156	492	492	0	16.402	0	0	0	0	5.1	11.8	265000000
	Tb927.9.5860:mRNA-p1;Tb927.9.5770:mRNA-p1	Tb927.9.5860:mRNA-p1;Tb927.9.5770:mRNA-p1	Tb927.9.5860	tryparedoxin peroxidase	Redox	0	2	0	1	6;6	6;6	6;6	2	6	6	6	0	2	1	1	2	4	0	2	1	1	2	4	0	2	1	1	2	4	32.7	32.7	32.7	22.424	199	199;199	0	24.717	0	11.6	5.5	6	13.1	20.1	477000000
	Tb927.7.4000:mRNA-p1	Tb927.7.4000:mRNA-p1	Tb927.7.4000	glutathione synthetase, putative	Redox	0	0	0	0	3	3	3	1	3	3	3	0	0	0	0	2	1	0	0	0	0	2	1	0	0	0	0	2	1	6.5	6.5	6.5	61.304	555	555	0	3.9368	0	0	0	0	4	2.5	16700000
	Tb927.4.2450:mRNA-p1	Tb927.4.2450:mRNA-p1	Tb927.4.2450	Protein Disulfide Isomerase 1	Redox	0	0	0	0	3	3	3	1	3	3	3	0	0	0	0	0	3	0	0	0	0	0	3	0	0	0	0	0	3	9.7	9.7	9.7	44.722	413	413	0	4.2724	0	0	0	0	0	9.7	37500000
	Tb927.3.5090:mRNA-p1	Tb927.3.5090:mRNA-p1	Tb927.3.5090	tryparedoxin, putative	Redox	0	0	0	0	2	2	2	1	2	2	2	0	0	0	0	2	1	0	0	0	0	2	1	0	0	0	0	2	1	14.1	14.1	14.1	22.18	198	198	0	9.2987	0	0	0	0	14.1	8.1	52200000
	Tb927.1.120:mRNA-p1;Tb11.0820:pseudogenic_transcript-p1;Tb11.v5.0295.1-p1	Tb927.1.120:mRNA-p1	Tb927.1.120	retrotransposon hot spot protein 4 (RHS4), putative	RHS	0	5	1	1	21;4;3	21;4;3	3;0;0	3	21	21	3	5	0	0	7	16	11	5	0	0	7	16	11	1	0	0	2	1	2	24.3	24.3	3.6	98.024	856	856;803;409	0	84.965	6.1	0	0	8.1	18.7	12.6	2820000000
	Tb927.2.470:mRNA-p1;Tb927.4.220:pseudogenic_transcript-p1;Tb11.v5.0800.1-p1;Tb11.v5.0294.1-p1;Tb927.4.290:mRNA-p1;Tb927.4.280:mRNA-p1;Tb927.4.270:mRNA-p1;Tb927.4.260:mRNA-p1;Tb927.4.300:mRNA-p1;Tb927.7.1970:mRNA-p1;Tb927.7.1960:mRNA-p1;Tb927.7.1950:mRNA-p1;Tb927.7.2000:mRNA-p1;Tb927.7.1990:pseudogenic_transcript-p1;Tb927.7.1980:mRNA-p1;Tb927.4.240:pseudogenic_transcript-p1	Tb927.2.470:mRNA-p1	Tb927.2.470	retrotransposon hot spot protein 4 (RHS4), putative	RHS	0	5	1	1	18;7;4;1;1;1;1;1;1;1;1;1;1;1;1;1	10;4;3;0;0;0;0;0;0;0;0;0;0;0;0;0	1;1;0;0;0;0;0;0;0;0;0;0;0;0;0;0	16	18	10	1	5	0	1	5	13	10	2	0	1	2	5	6	0	0	0	0	0	1	20.3	12.6	1.3	98.316	860	860;345;193;273;557;557;557;557;572;686;690;690;691;693;693;819	0	45.596	6.2	0	1.2	5.9	14.3	11.7	586000000
	Tb927.2.340:mRNA-p1	Tb927.2.340:mRNA-p1	Tb927.2.340	retrotransposon hot spot protein 4 (RHS4), putative	RHS	0	4	1	1	16	2	2	1	16	2	2	4	0	1	5	10	12	0	0	0	0	1	2	0	0	0	0	1	2	17.9	2.4	2.4	97.84	858	858	0	8.0452	5.4	0	1.2	5.9	11.1	14	210000000
	Tb927.2.450:mRNA-p1	Tb927.2.450:mRNA-p1	Tb927.2.450	retrotransposon hot spot protein 4 (RHS4), putative	RHS	0	5	1	1	14	3	2	1	14	3	2	5	0	1	5	12	7	0	0	0	0	3	1	0	0	0	0	2	1	17.2	4.7	3.5	97.997	857	857	0	5.879	6.5	0	1.2	6.2	14.7	8.3	103000000
	Tb927.2.1210:mRNA-p1;Tb11.v5.0442.1-p1;Tb11.1800:pseudogenic_transcript-p1	Tb927.2.1210:mRNA-p1	Tb927.2.1210	retrotransposon hot spot protein 4 (RHS4), putative	RHS	0	1	1	1	11;1;1	7;0;0	1;0;0	3	11	7	1	1	0	0	2	9	4	0	0	0	0	5	3	0	0	0	0	1	0	13.2	9.1	1.4	99.688	880	880;392;392	0	17.962	1.1	0	0	1.9	10.1	5	175000000
	Tb11.v5.0489.1-p1	Tb11.v5.0489.1-p1	Tb11.v5.0489	retrotransposon hot spot protein (RHS, pseudogene)	RHS	0	3	1	1	11	2	2	1	11	2	2	3	0	1	5	10	5	0	0	0	0	2	0	0	0	0	0	2	0	20.8	6.1	6.1	65.818	573	573	0	3.5731	6.3	0	1.7	9.4	19.2	8.6	32800000
	Tb927.2.560:mRNA-p1;Tb927.9.15810:mRNA-p1	Tb927.2.560:mRNA-p1	Tb927.2.560	retrotransposon hot spot protein 4 (RHS4), putative	RHS	0	1	1	1	10;1	1;1	0;0	2	10	1	0	1	0	0	2	8	4	0	0	0	0	1	1	0	0	0	0	0	0	11.5	0.9	0	95.911	845	845;590	0.0087241	1.1671	1.2	0	0	2	9.1	4.4	105000000
	Tb927.1.180:mRNA-p1;Tb927.1.220:mRNA-p1;Tb927.2.370:mRNA-p1	Tb927.1.180:mRNA-p1;Tb927.1.220:mRNA-p1;Tb927.2.370:mRNA-p1	Tb927.1.180	retrotransposon hot spot protein 1 (RHS1), putative	RHS	0	1	1	1	6;6;5	2;2;2	2;2;2	3	6	2	2	1	0	0	2	3	5	0	0	0	1	1	1	0	0	0	1	1	1	9.5	3.8	3.8	94.488	833	833;833;834	0	5.4792	1.8	0	0	3.5	4.9	7.3	9140000
	Tb11.v5.1020.1-p1	Tb11.v5.1020.1-p1	Tb11.v5.1020	retrotransposon hot spot (RHS) protein, putative	RHS	0	2	1	1	4	1	1	1	4	1	1	2	0	1	3	4	2	0	0	0	1	1	0	0	0	0	1	1	0	6.1	3.2	3.2	62.306	554	554	0	5.4251	4.9	0	1.8	6.1	6.1	3.8	66500000
	Tb927.2.100:mRNA-p1;Tb927.2.1344:pseudogenic_transcript-p1	Tb927.2.100:mRNA-p1	Tb927.2.100	retrotransposon hot spot protein 1 (RHS1), putative	RHS	0	1	0	1	12;2	12;2	1;0	2	12	12	1	1	0	0	1	7	8	1	0	0	1	7	8	0	0	0	0	0	1	14.7	14.7	0.8	94.932	829	829;71	0	37.652	1.8	0	0	1.8	10.5	10.1	1120000000
	Tb11.v5.0713.1-p1;Tb927.2.1330:pseudogenic_transcript-p1	Tb11.v5.0713.1-p1	Tb11.v5.0713	retrotransposon hot spot (RHS) protein, putative	RHS	0	0	0	0	10;2	10;2	5;2	2	10	10	5	0	0	0	0	7	5	0	0	0	0	7	5	0	0	0	0	3	3	14.4	14.4	8.1	78.342	688	688;602	0	19.215	0	0	0	0	9.7	7.1	630000000
	Tb927.2.280:mRNA-p1;Tb927.2.400:mRNA-p1;Tb927.2.380:mRNA-p1	Tb927.2.280:mRNA-p1;Tb927.2.400:mRNA-p1;Tb927.2.380:mRNA-p1	Tb927.2.280	retrotransposon hot spot protein 2 (RHS2), putative	RHS	0	0	0	1	9;8;7	9;8;7	0;0;0	3	9	9	0	0	0	0	1	6	3	0	0	0	1	6	3	0	0	0	0	0	0	12.3	12.3	0	90.22	789	789;789;789	0	29.056	0	0	0	1.4	8.6	3.7	190000000
	Tb11.v5.0594.1-p1;Tb927.4.210:pseudogenic_transcript-p1;Tb927.10.110:pseudogenic_transcript-p1;Tb11.v5.0533.1-p1;Tb10.v4.0219:pseudogenic_transcript-p1	Tb11.v5.0594.1-p1	Tb11.v5.0594	retrotransposon hot spot (RHS) protein, putative	RHS	0	0	0	1	8;3;3;2;1	1;0;0;0;0	1;0;0;0;0	5	8	1	1	0	0	0	1	6	2	0	0	0	0	0	1	0	0	0	0	0	1	16.4	3.3	3.3	68.785	602	602;477;493;323;231	0	3.3941	0	0	0	1.8	11.3	5.1	9350000
	Tb927.2.240:mRNA-p1	Tb927.2.240:mRNA-p1	Tb927.2.240	retrotransposon hot spot protein 5 (RHS5), putative	RHS	0	0	0	0	8	5	0	1	8	5	0	0	0	0	0	8	2	0	0	0	0	5	1	0	0	0	0	0	0	10.4	6.7	0	76.706	674	674	0	11.558	0	0	0	0	10.4	2.4	286000000
	Tb11.1790.1-p1;Tb927.2.1170:mRNA-p1;Tb927.2.720:pseudogenic_transcript-p1	Tb11.1790.1-p1;Tb927.2.1170:mRNA-p1	Tb927.2.1170	retrotransposon hot spot protein 5 (RHS5), putative	RHS	0	0	0	0	7;6;1	2;1;0	1;0;0	3	7	2	1	0	0	0	0	7	3	0	0	0	0	2	1	0	0	0	0	1	1	9.5	2.8	1.5	77.705	684	684;675;145	0	4.8925	0	0	0	0	9.5	3.8	167000000
	Tb927.1.190:pseudogenic_transcript-p1	Tb927.1.190:pseudogenic_transcript-p1	Tb927.1.190	retrotransposon hot spot protein (RHS, pseudogene)	RHS	0	0	0	1	6	1	1	1	6	1	1	0	0	0	1	4	3	0	0	0	0	0	1	0	0	0	0	0	1	8.4	2.4	2.4	94.659	830	830	0	10.107	0	0	0	1.3	4.7	4.7	8070000
	Tb927.4.110:pseudogenic_transcript-p1;Tb09.v4.0013:mRNA-p1	Tb927.4.110:pseudogenic_transcript-p1;Tb09.v4.0013:mRNA-p1	Tb927.4.110	retrotransposon hot spot protein (RHS1, pseudogene), putative	RHS	0	0	0	0	6;3	2;2	2;2	2	6	2	2	0	0	0	0	4	3	0	0	0	0	2	0	0	0	0	0	2	0	14.5	3.6	3.6	40.669	359	359;586	0	27.557	0	0	0	0	11.4	10	49200000
	Tb927.2.820:pseudogenic_transcript-p1;Tb11.v5.0670.1-p1;Tb927.10.70:mRNA-p1;Tb11.v5.0532.1-p1	Tb927.2.820:pseudogenic_transcript-p1;Tb11.v5.0670.1-p1	Tb927.2.820	retrotransposon hot spot protein (RHS1, pseudogene), putative	RHS	0	0	0	0	5;3;1;1	5;3;1;1	4;2;1;1	4	5	5	4	0	0	0	0	5	0	0	0	0	0	5	0	0	0	0	0	4	0	10.6	10.6	8.9	60.527	527	527;296;468;468	0	11.782	0	0	0	0	10.6	0	133000000
	Tb927.2.1180:mRNA-p1	Tb927.2.1180:mRNA-p1	Tb927.2.1180	retrotransposon hot spot protein 3 (RHS3), putative	RHS	0	1	0	1	5	2	2	1	5	2	2	1	0	1	1	5	1	0	0	0	0	2	0	0	0	0	0	2	0	6.2	1.7	1.7	67.838	579	579	0	4.8247	2.8	0	1.7	2.8	6.2	1.7	20700000
	Tb927.1.450:pseudogenic_transcript-p1;Tb927.1.430:pseudogenic_transcript-p1	Tb927.1.450:pseudogenic_transcript-p1	Tb927.1.450	retrotransposon hot spot protein (RHS, pseudogene), putative	RHS	0	0	0	1	4;1	1;1	1;1	2	4	1	1	0	0	0	1	3	1	0	0	0	1	0	0	0	0	0	1	0	0	2.1	0.4	0.4	229.01	2097	2097;2422	1	-2	0	0	0	0.4	1.8	0.4	711000
	Tb927.2.270:pseudogenic_transcript-p1;Tb927.5.280:pseudogenic_transcript-p1;Tb10.v4.0220:pseudogenic_transcript-p1	Tb927.2.270:pseudogenic_transcript-p1	Tb927.2.270	retrotransposon hot spot protein (RHS3, pseudogene), putative	RHS	0	0	0	1	4;1;1	1;0;0	0;0;0	3	4	1	0	0	0	0	1	2	2	0	0	0	0	0	1	0	0	0	0	0	0	6.9	2.8	0	65.747	581	581;277;325	0	27.264	0	0	0	1.2	2.9	4	28900000
	Tb927.2.510:mRNA-p1	Tb927.2.510:mRNA-p1	Tb927.2.510	retrotransposon hot spot protein 4 (RHS4), putative	RHS	0	0	0	1	4	1	1	1	4	1	1	0	0	0	1	4	1	0	0	0	0	1	0	0	0	0	0	1	0	4.4	1.3	1.3	95.163	837	837	0	4.2006	0	0	0	0.8	4.4	1	15200000
	Tb11.v5.0624.1-p1	Tb11.v5.0624.1-p1	Tb11.v5.0624	retrotransposon hot spot protein (PHS), putative	RHS	0	0	0	0	4	2	1	1	4	2	1	0	0	0	0	2	3	0	0	0	0	1	1	0	0	0	0	0	1	9.7	5.3	2.4	62.492	544	544	0	4.515	0	0	0	0	4.4	6.8	31600000
	Tb927.1.90:pseudogenic_transcript-p1	Tb927.1.90:pseudogenic_transcript-p1	Tb927.1.90	retrotransposon hot spot protein (RHS, pseudogene), putative	RHS	0	0	0	0	4	2	1	1	4	2	1	0	0	0	0	4	2	0	0	0	0	2	1	0	0	0	0	1	1	7.3	4.2	2	67.289	592	592	0	6.2359	0	0	0	0	7.3	3.4	87200000
	Tb09.v4.0067:pseudogenic_transcript-p1	Tb09.v4.0067:pseudogenic_transcript-p1	Tb09.v4.0067	retrotransposon hot spot protein, pseudogene	RHS	0	2	0	1	4	1	1	1	4	1	1	2	0	0	1	4	1	1	0	0	0	1	0	1	0	0	0	1	0	6.6	2	2	62.718	548	548	0.0088203	1.1932	3.8	0	0	1.8	6.6	1.6	175000000
	Tb927.2.830:pseudogenic_transcript-p1;Tb11.v5.0655.1-p1	Tb927.2.830:pseudogenic_transcript-p1;Tb11.v5.0655.1-p1	Tb927.2.830	retrotransposon hot spot protein (RHS1, pseudogene), putative	RHS	0	0	0	0	3;3	1;1	1;1	2	3	1	1	0	0	0	0	2	2	0	0	0	0	1	0	0	0	0	0	1	0	10.2	3.4	3.4	40.504	352	352;427	0.0013141	2.1055	0	0	0	0	5.7	6.8	17200000
	Tb927.2.1140:pseudogenic_transcript-p1	Tb927.2.1140:pseudogenic_transcript-p1	Tb927.2.1140	retrotransposon hot spot protein (RHS3, pseudogene), putative	RHS	0	0	0	0	3	1	1	1	3	1	1	0	0	0	0	1	2	0	0	0	0	1	0	0	0	0	0	1	0	10	3.5	3.5	37.92	340	340	0.0012804	1.9865	0	0	0	0	3.5	6.5	0
	Tb11.v5.0325.1-p1	Tb11.v5.0325.1-p1	Tb11.v5.0325	retrotransposon hot spot (RHS) protein, putative	RHS	0	0	0	0	2	1	1	1	2	1	1	0	0	0	0	2	1	0	0	0	0	1	0	0	0	0	0	1	0	6.5	4	4	36.986	325	325	0	3.6344	0	0	0	0	6.5	2.5	53400000
	Tb11.1780.1-p1	Tb11.1780.1-p1	Tb11.1780	retrotransposon hot spot protein (RHS1, pseudogene), putative	RHS	0	0	0	0	2	2	2	1	2	2	2	0	0	0	1	2	0	0	0	0	1	2	0	0	0	0	1	2	0	3.4	3.4	3.4	65.556	582	582	0	6.6552	0	0	0	1.5	3.4	0	44200000
	Tb927.1.330:pseudogenic_transcript-p1	Tb927.1.330:pseudogenic_transcript-p1	Tb927.1.330	retrotransposon hot spot protein (RHS, pseudogene), putative	RHS	0	0	0	0	1	1	1	1	1	1	1	0	0	0	0	0	1	0	0	0	0	0	1	0	0	0	0	0	1	6.7	6.7	6.7	30.257	284	284	0	3.0082	0	0	0	0	0	6.7	6370000
	Tb927.11.3600:mRNA-p1;Tb927.11.3590:mRNA-p1;Tb11.v5.1059.1-p1	Tb927.11.3600:mRNA-p1;Tb927.11.3590:mRNA-p1;Tb11.v5.1059.1-p1	Tb927.11.3600	40S ribosomal protein S4	Ribosome	0	2	1	1	24;24;24	24;24;24	24;24;24	3	24	24	24	0	0	2	2	19	11	0	0	2	2	19	11	0	0	2	2	19	11	66.3	66.3	66.3	30.644	273	273;273;273	0	67.465	0	0	5.9	7.7	62.3	35.2	5260000000
+	Tb927.10.14710:mRNA-p1;Tb927.10.14600:mRNA-p1	Tb927.10.14710:mRNA-p1;Tb927.10.14600:mRNA-p1	Tb927.10.14710	40S ribosomal protein S2	Ribosome	0	0	1	1	22;22	22;22	22;22	2	22	22	22	0	0	0	5	20	11	0	0	0	5	20	11	0	0	0	5	20	11	68	68	68	28.642	266	266;266	0	184.27	0	0	0	19.2	65.4	50.4	6760000000
+	Tb927.10.3940:mRNA-p1;Tb927.10.3930:mRNA-p1;Tb11.v5.0501.1-p1	Tb927.10.3940:mRNA-p1;Tb927.10.3930:mRNA-p1;Tb11.v5.0501.1-p1	Tb927.10.3940	40S ribosomal protein S3A	Ribosome	0	0	1	1	15;15;15	15;15;15	15;15;15	3	15	15	15	0	0	0	2	12	5	0	0	0	2	12	5	0	0	0	2	12	5	47.7	47.7	47.7	29.422	256	256;256;256	0	137.6	0	0	0	7.8	47.7	20.3	1900000000
	Tb927.9.15360:mRNA-p1	Tb927.9.15360:mRNA-p1	Tb927.9.15360	40S ribosomal protein S6	Ribosome	0	1	1	1	15	15	8	1	15	15	8	1	0	0	8	12	4	1	0	0	8	12	4	0	0	0	3	7	1	44	44	25.2	28.476	250	250	0	98.744	6.4	0	0	21.2	40.4	16	4870000000
	Tb927.11.6300:mRNA-p1	Tb927.11.6300:mRNA-p1	Tb927.11.6300	40S ribosomal protein S5	Ribosome	0	2	1	1	13	13	13	1	13	13	13	2	0	1	7	11	7	2	0	1	7	11	7	2	0	1	7	11	7	57.9	57.9	57.9	21.386	190	190	0	240.95	11.1	0	4.7	43.7	53.7	30	7140000000
	Tb927.11.10910:mRNA-p1;Tb927.11.10790:mRNA-p1	Tb927.11.10910:mRNA-p1;Tb927.11.10790:mRNA-p1	Tb927.11.10910	40S ribosomal protein SA	Ribosome	0	2	1	1	12;12	12;12	12;12	2	12	12	12	1	2	2	3	9	8	1	2	2	3	9	8	1	2	2	3	9	8	46.7	46.7	46.7	27.609	244	244;244	0	114.28	3.3	12.3	9.8	15.6	35.2	36.1	7780000000
	Tb927.10.560:mRNA-p1	Tb927.10.560:mRNA-p1	Tb927.10.560	40S ribosomal protein S11	Ribosome	0	1	1	1	11	11	2	1	11	11	2	1	0	0	5	10	5	1	0	0	5	10	5	0	0	0	1	2	0	55.2	55.2	12.1	20.087	174	174	0	77.271	5.2	0	0	26.4	55.2	25.3	4600000000
	Tb927.1.3180:mRNA-p1	Tb927.1.3180:mRNA-p1	Tb927.1.3180	40S ribosomal protein S11	Ribosome	0	1	1	1	11	2	2	1	11	2	2	1	0	0	4	9	6	0	0	0	0	1	1	0	0	0	0	1	1	55.2	12.1	12.1	20.059	174	174	0.0012987	2.0399	5.2	0	0	19.5	50	30.5	204000000
	Tb927.9.3990:mRNA-p1;Tb927.9.3920:mRNA-p1	Tb927.9.3990:mRNA-p1;Tb927.9.3920:mRNA-p1	Tb927.9.3990	40S ribosomal protein S7	Ribosome	0	1	1	1	11;10	11;10	11;10	2	11	11	11	1	0	0	3	10	3	1	0	0	3	10	3	1	0	0	3	10	3	51.5	51.5	51.5	23.841	202	202;202	0	48.171	5.9	0	0	22.8	51.5	12.9	1950000000
	Tb927.10.190:mRNA-p1	Tb927.10.190:mRNA-p1	Tb927.10.190	40S ribosomal protein S6	Ribosome	0	1	1	1	9	2	2	1	9	2	2	1	0	0	5	7	3	0	0	0	0	2	0	0	0	0	0	2	0	30.8	12	12	28.44	250	250	0	2.9348	6.4	0	0	13.6	28	13.2	84600000
	Tb927.10.5340:mRNA-p1;Tb927.10.5330:mRNA-p1;Tb11.v5.1060.1-p1;Tb11.v5.0243.1-p1	Tb927.10.5340:mRNA-p1;Tb927.10.5330:mRNA-p1;Tb11.v5.1060.1-p1;Tb11.v5.0243.1-p1	Tb927.10.5340	40S ribosomal protein S18	Ribosome	0	3	1	1	9;9;9;9	9;9;9;9	9;9;9;9	4	9	9	9	3	0	1	3	6	4	3	0	1	3	6	4	3	0	1	3	6	4	45.8	45.8	45.8	17.51	153	153;153;153;153	0	92.965	24.2	0	9.2	22.2	39.2	29.4	1060000000
	Tb927.11.8200:mRNA-p1	Tb927.11.8200:mRNA-p1	Tb927.11.8200	40S ribosomal protein S26	Ribosome	0	4	1	1	8	8	8	1	8	8	8	4	1	0	4	6	5	4	1	0	4	6	5	4	1	0	4	6	5	57.7	57.7	57.7	12.806	111	111	0	41.386	36	15.3	0	41.4	55	42.3	6770000000
	Tb927.11.13007:mRNA-p1;Tb927.11.13003:mRNA-p1;Tb11.v5.0537.1-p1;Tb927.11.9920:mRNA-p1;Tb11.01.1680.v5.1-p1	Tb927.11.13007:mRNA-p1;Tb927.11.13003:mRNA-p1;Tb11.v5.0537.1-p1;Tb927.11.9920:mRNA-p1;Tb11.01.1680.v5.1-p1	Tb927.11.13007	60S ribosomal protein L40-ubiquitin	Ribosome	0	1	1	1	5;5;5;5;5	5;5;5;5;5	5;5;5;5;5	5	5	5	5	0	1	0	2	5	4	0	1	0	2	5	4	0	1	0	2	5	4	36.7	36.7	36.7	14.656	128	128;128;623;685;1283	0	105.42	0	7	0	14.1	36.7	36.7	1980000000
	Tb927.9.15170:mRNA-p1;Tb927.9.15110:mRNA-p1	Tb927.9.15170:mRNA-p1;Tb927.9.15110:mRNA-p1	Tb927.9.15170	60S ribosomal protein L5	Ribosome	0	0	0	1	13;13	13;13	13;13	2	13	13	13	0	0	0	1	12	7	0	0	0	1	12	7	0	0	0	1	12	7	50.3	50.3	50.3	34.636	308	308;308	0	58.828	0	0	0	2.9	48.1	22.1	3390000000
	Tb927.11.14020:mRNA-p1;Tb927.11.14000:mRNA-p1	Tb927.11.14020:mRNA-p1;Tb927.11.14000:mRNA-p1	Tb927.11.14020	RNA-binding protein (NRBD2)	Ribosome	0	1	0	0	12;10	12;10	12;10	2	12	12	12	0	0	1	0	12	7	0	0	1	0	12	7	0	0	1	0	12	7	43.4	43.4	43.4	30.274	279	279;262	0	59.106	0	0	3.2	0	43.4	29.4	3540000000
	Tb927.8.1110:mRNA-p1;Tb927.10.5610:mRNA-p1	Tb927.8.1110:mRNA-p1;Tb927.10.5610:mRNA-p1	Tb927.8.1110	40S ribosomal protein S9 190aa, 22KDa	Ribosome	0	0	0	1	10;10	10;10	10;10	2	10	10	10	0	0	0	1	10	3	0	0	0	1	10	3	0	0	0	1	10	3	55.8	55.8	55.8	22.051	190	190;190	0	56.965	0	0	0	5.8	55.8	13.7	3630000000
	Tb927.3.3320:mRNA-p1;Tb927.3.3310:mRNA-p1	Tb927.3.3320:mRNA-p1;Tb927.3.3310:mRNA-p1	Tb927.3.3320	60S ribosomal protein L13	Ribosome	0	0	0	0	10;10	10;10	10;10	2	10	10	10	0	0	0	9	3	0	0	0	0	9	3	0	0	0	0	9	3	0	38.5	38.5	38.5	25.427	218	218;218	0	57.057	0	0	0	33.5	14.2	0	319000000
	Tb927.4.2180:mRNA-p1	Tb927.4.2180:mRNA-p1	Tb927.4.2180	60S ribosomal protein L35a	Ribosome	0	0	0	0	10	10	10	1	10	10	10	0	0	0	0	10	3	0	0	0	0	10	3	0	0	0	0	10	3	45.6	45.6	45.6	17.021	149	149	0	19.602	0	0	0	0	45.6	13.4	4380000000
	Tb927.11.15900:mRNA-p1;Tb927.11.15880:mRNA-p1	Tb927.11.15900:mRNA-p1;Tb927.11.15880:mRNA-p1	Tb927.11.15900	60S ribosomal protein L27	Ribosome	0	0	0	1	9;9	9;9	9;9	2	9	9	9	0	0	0	2	8	1	0	0	0	2	8	1	0	0	0	2	8	1	38.3	38.3	38.3	15.581	133	133;133	0	19.147	0	0	0	14.3	37.6	7.5	906000000
	Tb927.3.5050:mRNA-p1	Tb927.3.5050:mRNA-p1	Tb927.3.5050	60S ribosomal protein L4	Ribosome	0	0	0	0	9	9	9	1	9	9	9	0	0	0	7	2	0	0	0	0	7	2	0	0	0	0	7	2	0	38.5	38.5	38.5	41.856	374	374	0	31.424	0	0	0	26.5	12	0	94200000
	Tb927.9.8420:mRNA-p1;Tb927.9.8070:mRNA-p1	Tb927.9.8420:mRNA-p1;Tb927.9.8070:mRNA-p1	Tb927.9.8420	60S ribosomal protein L10	Ribosome	0	0	0	0	8;8	8;8	8;8	2	8	8	8	0	0	0	0	7	1	0	0	0	0	7	1	0	0	0	0	7	1	33.3	33.3	33.3	24.736	213	213;213	0	26.864	0	0	0	0	26.8	6.6	836000000
	Tb927.10.11390:mRNA-p1	Tb927.10.11390:mRNA-p1	Tb927.10.11390	60S ribosomal protein L6	Ribosome	0	0	0	0	8	8	8	1	8	8	8	0	0	0	0	6	7	0	0	0	0	6	7	0	0	0	0	6	7	46.4	46.4	46.4	21.185	192	192	0	46.482	0	0	0	0	42.2	35.9	1220000000
	Tb927.10.1100:mRNA-p1;Tb927.6.4690:mRNA-p1	Tb927.10.1100:mRNA-p1;Tb927.6.4690:mRNA-p1	Tb927.10.1100	60S ribosomal protein L9	Ribosome	0	0	0	0	8;7	8;7	8;7	2	8	8	8	0	0	0	0	7	4	0	0	0	0	7	4	0	0	0	0	7	4	56.1	56.1	56.1	21.857	189	189;187	0	45.838	0	0	0	0	52.4	26.5	810000000
	Tb927.11.14130:mRNA-p1;Tb927.10.3840:mRNA-p1	Tb927.11.14130:mRNA-p1;Tb927.10.3840:mRNA-p1	Tb927.11.14130	60S ribosomal protein L18	Ribosome	0	0	0	1	7;7	7;7	7;7	2	7	7	7	0	0	0	1	7	3	0	0	0	1	7	3	0	0	0	1	7	3	37.4	37.4	37.4	20.904	179	179;179	0	43.419	0	0	0	7.8	37.4	24.6	727000000
	Tb927.5.1110:mRNA-p1;Tb927.11.16280:mRNA-p1	Tb927.5.1110:mRNA-p1;Tb927.11.16280:mRNA-p1	Tb927.5.1110	60S ribosomal protein L2 L8	Ribosome	0	0	0	1	6;6	6;6	6;6	2	6	6	6	0	0	0	1	5	3	0	0	0	1	5	3	0	0	0	1	5	3	27.7	27.7	27.7	28.314	260	260;260	0	25.572	0	0	0	8.8	25	8.1	782000000
	Tb927.11.4300:mRNA-p1;Tb927.10.9880:mRNA-p1	Tb927.11.4300:mRNA-p1;Tb927.10.9880:mRNA-p1	Tb927.11.4300	60S ribosomal protein L18	Ribosome	0	0	0	0	6;6	6;6	6;6	2	6	6	6	0	0	0	3	3	0	0	0	0	3	3	0	0	0	0	3	3	0	37.8	37.8	37.8	21.874	193	193;193	0	22.598	0	0	0	24.4	13.5	0	140000000
	Tb927.7.5020:mRNA-p1;Tb927.7.5000:mRNA-p1;Tb11.v5.0182.1-p1;Tb11.v5.0181.1-p1	Tb927.7.5020:mRNA-p1;Tb927.7.5000:mRNA-p1;Tb11.v5.0182.1-p1;Tb11.v5.0181.1-p1	Tb927.7.5020	60S ribosomal protein L19	Ribosome	0	0	0	0	6;6;6;6	6;6;6;6	6;6;6;6	4	6	6	6	0	0	0	2	5	0	0	0	0	2	5	0	0	0	0	2	5	0	16.5	16.5	16.5	29.408	260	260;260;260;260	0	21.229	0	0	0	8.1	16.5	0	188000000
	Tb927.8.1340:mRNA-p1;Tb927.8.1330:mRNA-p1	Tb927.8.1340:mRNA-p1;Tb927.8.1330:mRNA-p1	Tb927.8.1340	60S ribosomal protein L7a	Ribosome	0	0	0	0	6;6	6;6	6;6	2	6	6	6	0	0	0	1	6	0	0	0	0	1	6	0	0	0	0	1	6	0	21.7	21.7	21.7	30.879	276	276;276	0	18.775	0	0	0	5.1	21.7	0	545000000
	Tb927.10.1090:mRNA-p1;Tb927.10.1080:mRNA-p1	Tb927.10.1090:mRNA-p1;Tb927.10.1080:mRNA-p1	Tb927.10.1090	40S ribosomal protein S23	Ribosome	0	1	0	1	6;6	6;6	6;6	2	6	6	6	0	1	1	1	6	2	0	1	1	1	6	2	0	1	1	1	6	2	54.5	54.5	54.5	15.928	143	143;143	0	34.273	0	8.4	8.4	8.4	54.5	16.1	1500000000
	Tb927.7.1050:mRNA-p1;Tb927.7.1040:mRNA-p1	Tb927.7.1050:mRNA-p1;Tb927.7.1040:mRNA-p1	Tb927.7.1050	40S ribosomal protein S16	Ribosome	0	1	0	0	6;6	6;6	6;6	2	6	6	6	0	0	1	0	4	3	0	0	1	0	4	3	0	0	1	0	4	3	39.6	39.6	39.6	16.998	149	149;149	0	10.304	0	0	8.1	0	26.8	20.1	588000000
	Tb927.7.1750:mRNA-p1;Tb927.7.1740:mRNA-p1;Tb927.7.1730:mRNA-p1	Tb927.7.1750:mRNA-p1;Tb927.7.1740:mRNA-p1;Tb927.7.1730:mRNA-p1	Tb927.7.1750	60S ribosomal protein L7	Ribosome	0	0	0	1	5;5;5	5;5;5	5;5;5	3	5	5	5	0	0	0	2	3	1	0	0	0	2	3	1	0	0	0	2	3	1	23.6	23.6	23.6	27.713	242	242;242;242	0	7.8742	0	0	0	14	16.5	3.7	111000000
	Tb927.10.4120.2:mRNA-p1;Tb927.10.4110:mRNA-p1;Tb927.10.4120.1:mRNA-p1	Tb927.10.4120.2:mRNA-p1;Tb927.10.4110:mRNA-p1;Tb927.10.4120.1:mRNA-p1	Tb927.10.4120	60S ribosomal protein L30	Ribosome	0	0	0	0	5;5;5	5;5;5	5;5;5	3	5	5	5	0	0	0	0	3	2	0	0	0	0	3	2	0	0	0	0	3	2	68.6	68.6	68.6	11.512	105	105;105;114	0	13.817	0	0	0	0	42.9	25.7	135000000
	Tb927.4.1860:mRNA-p1	Tb927.4.1860:mRNA-p1	Tb927.4.1860	40S ribosomal protein S19	Ribosome	0	0	0	0	4	4	4	1	4	4	4	0	0	0	0	4	0	0	0	0	0	4	0	0	0	0	0	4	0	23.4	23.4	23.4	18.846	167	167	0	19.21	0	0	0	0	23.4	0	499000000
	Tb927.5.1610:mRNA-p1;Tb927.4.3550:mRNA-p1	Tb927.5.1610:mRNA-p1;Tb927.4.3550:mRNA-p1	Tb927.5.1610	60S ribosomal protein L13a	Ribosome	0	0	0	0	4;4	4;4	4;4	2	4	4	4	0	0	0	2	3	0	0	0	0	2	3	0	0	0	0	2	3	0	20.7	20.7	20.7	25.711	222	222;222	0	21.743	0	0	0	9.9	17.1	0	240000000
	Tb927.9.11410:mRNA-p1;Tb927.9.11380:mRNA-p1	Tb927.9.11410:mRNA-p1;Tb927.9.11380:mRNA-p1	Tb927.9.11410	60S ribosomal protein L23	Ribosome	0	0	0	0	4;4	4;4	4;4	2	4	4	4	0	0	0	0	3	2	0	0	0	0	3	2	0	0	0	0	3	2	39.6	39.6	39.6	14.962	139	139;139	0	12.324	0	0	0	0	25.2	20.9	246000000
	Tb927.10.5480:mRNA-p1;Tb927.10.5460:mRNA-p1	Tb927.10.5480:mRNA-p1;Tb927.10.5460:mRNA-p1	Tb927.10.5480	60S ribosomal protein L24	Ribosome	0	0	0	0	4;4	4;4	4;4	2	4	4	4	0	0	0	1	4	0	0	0	0	1	4	0	0	0	0	1	4	0	45.6	45.6	45.6	14.595	125	125;125	0	19.794	0	0	0	11.2	45.6	0	313000000
	Tb927.9.14370:mRNA-p1;Tb927.8.6180:mRNA-p1	Tb927.9.14370:mRNA-p1;Tb927.8.6180:mRNA-p1	Tb927.9.14370	60S ribosomal protein L26	Ribosome	0	0	0	0	4;4	4;4	4;4	2	4	4	4	0	0	0	0	4	2	0	0	0	0	4	2	0	0	0	0	4	2	27.3	27.3	27.3	16.454	143	143;143	0	5.4361	0	0	0	0	27.3	7.7	491000000
	Tb927.11.9730:mRNA-p1;Tb927.10.12680:mRNA-p1	Tb927.11.9730:mRNA-p1;Tb927.10.12680:mRNA-p1	Tb927.11.9730	60S ribosomal protein L34	Ribosome	0	0	0	0	4;4	4;4	4;4	2	4	4	4	0	0	0	3	2	0	0	0	0	3	2	0	0	0	0	3	2	0	15.3	15.3	15.3	19.336	170	170;170	0	4.5326	0	0	0	15.3	11.8	0	149000000
	Tb927.11.6510:mRNA-p1;Tb927.11.6500:mRNA-p1	Tb927.11.6510:mRNA-p1;Tb927.11.6500:mRNA-p1	Tb927.11.6510	40S ribosomal protein S21	Ribosome	0	0	0	0	3;3	3;3	3;3	2	3	3	3	0	0	0	0	3	1	0	0	0	0	3	1	0	0	0	0	3	1	25.8	25.8	25.8	21.118	194	194;196	0	34.067	0	0	0	0	25.8	7.7	222000000
	Tb927.8.6160:mRNA-p1;Tb927.8.6150:mRNA-p1	Tb927.8.6160:mRNA-p1;Tb927.8.6150:mRNA-p1	Tb927.8.6160	40S ribosomal protein S8	Ribosome	0	0	0	0	3;3	3;3	3;3	2	3	3	3	0	0	0	1	3	0	0	0	0	1	3	0	0	0	0	1	3	0	19.5	19.5	19.5	24.937	220	220;220	0	34.075	0	0	0	6.8	19.5	0	266000000
	Tb927.9.7620:mRNA-p1;Tb927.9.7590:mRNA-p1	Tb927.9.7620:mRNA-p1;Tb927.9.7590:mRNA-p1	Tb927.9.7620	60S ribosomal protein L11	Ribosome	0	0	0	0	3;3	3;3	3;3	2	3	3	3	0	0	0	0	2	1	0	0	0	0	2	1	0	0	0	0	2	1	9.3	9.3	9.3	22.369	194	194;194	0	3.5046	0	0	0	0	5.2	4.1	93900000
	Tb927.11.7685:mRNA-p1;Tb927.11.7675:mRNA-p1	Tb927.11.7685:mRNA-p1;Tb927.11.7675:mRNA-p1	Tb927.11.7685	40S ribosomal protein S10p/S20	Ribosome	0	0	0	1	2;2	2;2	2;2	2	2	2	2	0	0	0	1	1	2	0	0	0	1	1	2	0	0	0	1	1	2	14.5	14.5	14.5	13.354	117	117;117	0	6.0759	0	0	0	8.5	8.5	14.5	441000000
	Tb927.7.2370:mRNA-p1;Tb927.7.2340:mRNA-p1	Tb927.7.2370:mRNA-p1;Tb927.7.2340:mRNA-p1	Tb927.7.2370	40S ribosomal protein S15	Ribosome	0	0	0	0	2;2	2;2	2;2	2	2	2	2	0	0	0	0	2	0	0	0	0	0	2	0	0	0	0	0	2	0	15.8	15.8	15.8	17.474	152	152;152	0	3.7685	0	0	0	0	15.8	0	23000000
	Tb927.3.4360:mRNA-p1;Tb927.11.6140:mRNA-p1	Tb927.3.4360:mRNA-p1;Tb927.11.6140:mRNA-p1	Tb927.3.4360	40S ribosomal protein S15A	Ribosome	0	0	0	0	2;2	2;2	2;2	2	2	2	2	0	0	0	0	2	0	0	0	0	0	2	0	0	0	0	0	2	0	16.9	16.9	16.9	14.645	130	130;130	0	3.653	0	0	0	0	16.9	0	20000000
	Tb927.11.9720:mRNA-p1;Tb927.10.13517:mRNA-p1	Tb927.11.9720:mRNA-p1;Tb927.10.13517:mRNA-p1	Tb927.11.9720	40S ribosomal protein S27	Ribosome	0	0	0	0	2;2	2;2	2;2	2	2	2	2	0	0	0	0	2	0	0	0	0	0	2	0	0	0	0	0	2	0	16.3	16.3	16.3	9.6302	86	86;86	0	5.8348	0	0	0	0	16.3	0	143000000
	Tb927.9.15190:mRNA-p1;Tb927.6.5040:mRNA-p1	Tb927.9.15190:mRNA-p1;Tb927.6.5040:mRNA-p1	Tb927.9.15190	60S ribosomal protein L15	Ribosome	0	0	0	0	2;2	2;2	2;2	2	2	2	2	0	0	0	1	2	0	0	0	0	1	2	0	0	0	0	1	2	0	10.8	10.8	10.8	24.401	204	204;204	0	3.6362	0	0	0	7.4	10.8	0	379000000
	Tb927.9.9210:mRNA-p1;Tb927.11.3000:mRNA-p1	Tb927.9.9210:mRNA-p1;Tb927.11.3000:mRNA-p1	Tb927.9.9210	60S ribosomal protein L37	Ribosome	0	0	0	0	2;2	2;2	2;2	2	2	2	2	0	0	0	0	2	0	0	0	0	0	2	0	0	0	0	0	2	0	20.2	20.2	20.2	10.1	84	84;84	0	3.3686	0	0	0	0	20.2	0	180000000
	Tb927.7.240:mRNA-p1;Tb927.7.230:mRNA-p1	Tb927.7.240:mRNA-p1;Tb927.7.230:mRNA-p1	Tb927.7.240	40S ribosomal protein S33	Ribosome	0	2	0	1	2;2	2;2	2;2	2	2	2	2	2	0	1	1	2	2	2	0	1	1	2	2	2	0	1	1	2	2	13.6	13.6	13.6	11.17	103	103;103	0	12.658	13.6	0	11.7	11.7	13.6	13.6	637000000
	Tb927.11.11830:mRNA-p1;Tb927.11.11820:mRNA-p1	Tb927.11.11830:mRNA-p1;Tb927.11.11820:mRNA-p1	Tb927.11.11830	40S ribosomal protein S17	Ribosome	0	0	0	0	1;1	1;1	1;1	2	1	1	1	0	0	0	0	0	1	0	0	0	0	0	1	0	0	0	0	0	1	4.9	4.9	4.9	16.222	142	142;142	1	-2	0	0	0	0	0	4.9	27900000
	Tb927.10.7340:mRNA-p1;Tb927.10.7330:mRNA-p1	Tb927.10.7340:mRNA-p1;Tb927.10.7330:mRNA-p1	Tb927.10.7340	40S ribosomal protein S24E	Ribosome	0	0	0	0	1;1	1;1	1;1	2	1	1	1	0	0	0	0	1	0	0	0	0	0	1	0	0	0	0	0	1	0	9.5	9.5	9.5	15.683	137	137;137	0	6.0579	0	0	0	0	9.5	0	68700000
	Tb927.10.8200:mRNA-p1	Tb927.10.8200:mRNA-p1	Tb927.10.8200	60S Ribosomal protein L1	Ribosome	0	0	0	0	1	1	1	1	1	1	1	0	0	0	0	0	1	0	0	0	0	0	1	0	0	0	0	0	1	2.6	2.6	2.6	30.838	269	269	0.0056625	1.2874	0	0	0	0	0	2.6	0
	Tb927.9.14000:mRNA-p1;Tb927.8.6030:mRNA-p1	Tb927.9.14000:mRNA-p1;Tb927.8.6030:mRNA-p1	Tb927.9.14000	60S ribosomal protein L12	Ribosome	0	0	0	0	1;1	1;1	1;1	2	1	1	1	0	0	0	0	0	1	0	0	0	0	0	1	0	0	0	0	0	1	9.1	9.1	9.1	17.578	164	164;164	0	2.2285	0	0	0	0	0	9.1	32300000
	Tb927.11.4820:mRNA-p1;Tb927.10.14580:mRNA-p1	Tb927.11.4820:mRNA-p1;Tb927.10.14580:mRNA-p1	Tb927.11.4820	60S ribosomal protein L17	Ribosome	0	0	0	0	1;1	1;1	1;1	2	1	1	1	0	0	0	0	1	0	0	0	0	0	1	0	0	0	0	0	1	0	5.4	5.4	5.4	19.105	166	166;166	0.0046458	1.4649	0	0	0	0	5.4	0	26300000
	Tb927.4.1100:mRNA-p1;Tb927.11.680:mRNA-p1;Tb11.0880:mRNA-p1	Tb927.4.1100:mRNA-p1;Tb927.11.680:mRNA-p1;Tb11.0880:mRNA-p1	Tb927.4.1100	60S ribosomal protein L21e	Ribosome	0	0	0	0	1;1;1	1;1;1	1;1;1	3	1	1	1	0	0	0	0	1	1	0	0	0	0	1	1	0	0	0	0	1	1	6.3	6.3	6.3	18.015	159	159;159;159	0.0047004	1.5175	0	0	0	0	6.3	6.3	52600000
	Tb927.10.6370:mRNA-p1;Tb927.10.220:mRNA-p1	Tb927.10.6370:mRNA-p1;Tb927.10.220:mRNA-p1	Tb927.10.6370	60S ribosomal protein L5	Ribosome	0	0	0	0	1;1	1;1	1;1	2	1	1	1	0	0	0	0	1	1	0	0	0	0	1	1	0	0	0	0	1	1	19.4	19.4	19.4	10.458	93	93;93	0	8.0986	0	0	0	0	19.4	19.4	165000000
+	Tb927.9.9450:mRNA-p1	Tb927.9.9450:mRNA-p1	Tb927.9.9450	ZC3H28	RNA.binding	0	0	1	1	21	21	20	1	21	21	20	0	0	0	7	14	8	0	0	0	7	14	8	0	0	0	7	14	8	25	25	23.7	114.75	1030	1030	0	131.75	0	0	0	8.6	19.5	9.1	1820000000
+	Tb927.4.2040:mRNA-p1	Tb927.4.2040:mRNA-p1	Tb927.4.2040	ALBA3	RNA.binding	0	3	1	1	15	15	7	1	15	15	7	0	3	1	6	13	10	0	3	1	6	13	10	0	1	0	1	7	4	51.6	51.6	23.2	20.808	190	190	0	301.37	0	24.2	5.8	33.2	46.8	47.9	11100000000
	Tb927.11.14090:mRNA-p1	Tb927.11.14090:mRNA-p1	Tb927.11.14090	DRBD18	RNA.binding	0	2	1	1	15	15	15	1	15	15	15	1	1	2	2	10	12	1	1	2	2	10	12	1	1	2	2	10	12	37.9	37.9	37.9	51.674	480	480	0	79.452	3.1	3.1	4	5.2	27.5	29.4	2210000000
	Tb927.10.13720:mRNA-p1	Tb927.10.13720:mRNA-p1	Tb927.10.13720	RBP29	RNA.binding	0	4	1	1	15	15	15	1	15	15	15	0	4	0	2	13	5	0	4	0	2	13	5	0	4	0	2	13	5	31.6	31.6	31.6	40.678	377	377	0	67.552	0	13.3	0	4.5	29.7	13.5	2820000000
	Tb927.4.2030:mRNA-p1	Tb927.4.2030:mRNA-p1	Tb927.4.2030	ALBA4	RNA.binding	0	2	1	1	12	4	4	1	12	4	4	0	2	1	5	10	7	0	0	0	0	4	1	0	0	0	0	4	1	43.8	18.9	18.9	22.704	217	217	0	75.688	0	9.7	5.1	17.5	39.6	35	430000000
+	Tb927.10.5250:mRNA-p1;Tb11.v5.0232.1-p1	Tb927.10.5250:mRNA-p1;Tb11.v5.0232.1-p1	Tb927.10.5250	ZC3H32	RNA.binding	0	0	1	1	8;7	8;7	8;7	2	8	8	8	0	0	0	2	6	3	0	0	0	2	6	3	0	0	0	2	6	3	11.5	11.5	11.5	72.04	655	655;630	0	12.544	0	0	0	4	10.1	6	260000000
	Tb927.3.3940:mRNA-p1	Tb927.3.3940:mRNA-p1	Tb927.3.3940	DRBD11	RNA.binding	0	3	1	1	7	7	7	1	7	7	7	2	3	1	2	5	3	2	3	1	2	5	3	2	3	1	2	5	3	20.7	20.7	20.7	61.716	593	593	0	35.645	5.6	8.9	2.7	5.6	14.7	7.4	522000000
	Tb927.3.870:mRNA-p1	Tb927.3.870:mRNA-p1	Tb927.3.870	SLBP2, like histone RNA hairpin binding proteins, binds to EIF4E2	RNA.binding	0	0	0	1	18	18	18	1	18	18	18	0	0	0	1	11	12	0	0	0	1	11	12	0	0	0	1	11	12	48.4	48.4	48.4	47.873	432	432	0	134.99	0	0	0	2.1	29.9	31.9	1890000000
	Tb927.6.2550:mRNA-p1	Tb927.6.2550:mRNA-p1	Tb927.6.2550	TRRM2	RNA.binding	0	0	0	1	12	12	12	1	12	12	12	0	0	0	1	9	8	0	0	0	1	9	8	0	0	0	1	9	8	19.3	19.3	19.3	82.867	755	755	0	82.677	0	0	0	2	16.8	10.7	917000000
	Tb927.3.1030:mRNA-p1	Tb927.3.1030:mRNA-p1	Tb927.3.1030	RBP28	RNA.binding	0	2	0	0	12	12	12	1	12	12	12	0	2	1	0	6	10	0	2	1	0	6	10	0	2	1	0	6	10	45.1	45.1	45.1	39.272	357	357	0	127.29	0	11.5	5.3	0	23.2	35	1070000000
	Tb927.10.12660:mRNA-p1	Tb927.10.12660:mRNA-p1	Tb927.10.12660	PUF2	RNA.binding	0	8	0	0	11	11	11	1	11	11	11	8	4	0	0	1	0	8	4	0	0	1	0	8	4	0	0	1	0	20.8	20.8	20.8	92.245	847	847	0	25.034	14.2	8.5	0	0	2.1	0	142000000
	Tb927.9.9520:mRNA-p1	Tb927.9.9520:mRNA-p1	Tb927.9.9520	ZC3H29	RNA.binding	0	3	0	1	10	10	10	1	10	10	10	1	3	2	1	9	6	1	3	2	1	9	6	1	3	2	1	9	6	25.8	25.8	25.8	37.741	345	345	0	33.16	2.6	11	6.4	2.6	22	18.3	4200000000
	Tb927.10.310:mRNA-p1	Tb927.10.310:mRNA-p1	Tb927.10.310	PUF3	RNA.binding	0	2	0	0	9	9	9	1	9	9	9	1	2	0	0	3	4	1	2	0	0	3	4	1	2	0	0	3	4	19.9	19.9	19.9	61.06	558	558	0	15.193	1.8	5.6	0	0	6.6	7.7	196000000
	Tb927.11.14100:mRNA-p1	Tb927.11.14100:mRNA-p1	Tb927.11.14100	DRBD4 (PTB2)	RNA.binding	0	0	0	1	8	8	8	1	8	8	8	0	0	0	1	8	5	0	0	0	1	8	5	0	0	0	1	8	5	24.2	24.2	24.2	54.707	505	505	0	46.274	0	0	0	2.2	24.2	15.4	2140000000
	Tb927.10.11760:mRNA-p1	Tb927.10.11760:mRNA-p1	Tb927.10.11760	PUF6	RNA.binding	0	4	0	0	8	8	8	1	8	8	8	4	1	0	0	4	2	4	1	0	0	4	2	4	1	0	0	4	2	14	14	14	93.062	843	843	0	72.942	7.9	2.3	0	0	6	3.6	212000000
	Tb927.11.4460:mRNA-p1	Tb927.11.4460:mRNA-p1	Tb927.11.4460	ALBA1	RNA.binding	0	0	0	0	7	7	7	1	7	7	7	0	0	0	0	6	4	0	0	0	0	6	4	0	0	0	0	6	4	47.2	47.2	47.2	14.038	125	125	0	92.123	0	0	0	0	40.8	28.8	943000000
	Tb927.8.2780:mRNA-p1	Tb927.8.2780:mRNA-p1	Tb927.8.2780	RBP10	RNA.binding	0	3	0	1	6	6	6	1	6	6	6	0	3	1	1	4	3	0	3	1	1	4	3	0	3	1	1	4	3	32	32	32	32.195	306	306	0	25.846	0	11.8	4.2	7.2	21.2	15	579000000
	Tb927.10.12330:mRNA-p1	Tb927.10.12330:mRNA-p1	Tb927.10.12330	ZC3H34	RNA.binding	0	1	0	0	5	5	5	1	5	5	5	0	1	0	0	3	2	0	1	0	0	3	2	0	1	0	0	3	2	25.2	25.2	25.2	22.365	202	202	0	8.9356	0	6.4	0	0	18.8	10.4	180000000
	Tb927.7.3730:mRNA-p1	Tb927.7.3730:mRNA-p1	Tb927.7.3730	RBP26	RNA.binding	0	2	0	0	5	5	5	1	5	5	5	0	2	1	0	3	2	0	2	1	0	3	2	0	2	1	0	3	2	15.6	15.6	15.6	36.384	340	340	0	10.643	0	8.2	2.4	0	12.4	4.7	203000000
	Tb927.11.14950:mRNA-p1	Tb927.11.14950:mRNA-p1	Tb927.11.14950	ZFP2	RNA.binding	0	1	0	0	4	4	4	1	4	4	4	0	1	1	0	4	2	0	1	1	0	4	2	0	1	1	0	4	2	59.7	59.7	59.7	15.767	139	139	0	20.316	0	14.4	5.8	0	59.7	20.1	1680000000
	Tb927.4.400:mRNA-p1	Tb927.4.400:mRNA-p1	Tb927.4.400	DRBD7	RNA.binding	0	3	0	0	4	4	4	1	4	4	4	1	3	0	0	2	1	1	3	0	0	2	1	1	3	0	0	2	1	20.1	20.1	20.1	42.495	384	384	0	33.082	4.7	18	0	0	9.4	4.7	90500000
	Tb927.11.7140:mRNA-p1	Tb927.11.7140:mRNA-p1	Tb927.11.7140	CSBPII_33	RNA.binding	0	0	0	0	3	3	3	1	3	3	3	0	0	0	0	1	3	0	0	0	0	1	3	0	0	0	0	1	3	13.7	13.7	13.7	35.476	313	313	0	82.324	0	0	0	0	4.2	13.7	84200000
	Tb927.1.2600:mRNA-p1	Tb927.1.2600:mRNA-p1	Tb927.1.2600	PUF9	RNA.binding	0	0	0	0	3	3	3	1	3	3	3	0	0	0	0	2	1	0	0	0	0	2	1	0	0	0	0	2	1	4.8	4.8	4.8	74.065	667	667	0	5.0959	0	0	0	0	2.5	2.2	33000000
	Tb927.7.320:mRNA-p1	Tb927.7.320:mRNA-p1	Tb927.7.320	RBP8	RNA.binding	0	0	0	0	3	3	3	1	3	3	3	0	0	0	0	2	1	0	0	0	0	2	1	0	0	0	0	2	1	27.8	27.8	27.8	20.27	180	180	0	14.077	0	0	0	0	17.8	10	41400000
	Tb927.3.5250:mRNA-p1	Tb927.3.5250:mRNA-p1	Tb927.3.5250	ZC3H8	RNA.binding	0	0	0	0	3	3	3	1	3	3	3	0	0	0	0	2	2	0	0	0	0	2	2	0	0	0	0	2	2	6.6	6.6	6.6	61.206	579	579	0	11.577	0	0	0	0	4	5.4	55800000
	Tb927.6.820:mRNA-p1	Tb927.6.820:mRNA-p1	Tb927.6.820	PUF4	RNA.binding	0	1	0	1	3	3	3	1	3	3	3	1	0	0	1	1	1	1	0	0	1	1	1	1	0	0	1	1	1	3.8	3.8	3.8	111.38	1033	1033	0	5.2656	1.7	0	0	1.7	0.8	1.3	38100000
	Tb927.10.12090:mRNA-p1	Tb927.10.12090:mRNA-p1	Tb927.10.12090	RBP7A	RNA.binding	0	1	0	0	3	3	3	1	3	3	3	0	1	0	0	2	2	0	1	0	0	2	2	0	1	0	0	2	2	31	31	31	13.272	116	116	0	32.278	0	12.1	0	0	24.1	19	302000000
	Tb927.11.3500:mRNA-p1	Tb927.11.3500:mRNA-p1	Tb927.11.3500	hypothetical protein, RBD	RNA.binding	0	0	0	0	2	2	2	1	2	2	2	0	0	0	0	2	0	0	0	0	0	2	0	0	0	0	0	2	0	1.5	1.5	1.5	115.19	1017	1017	0.0012723	1.9635	0	0	0	0	1.5	0	11800000
	Tb927.11.12120:mRNA-p1	Tb927.11.12120:mRNA-p1	Tb927.11.12120	RBP9	RNA.binding	0	0	0	0	2	2	2	1	2	2	2	0	0	0	0	2	1	0	0	0	0	2	1	0	0	0	0	2	1	11.5	11.5	11.5	23.349	217	217	0	4.3752	0	0	0	0	11.5	5.1	52600000
	Tb927.11.4450:mRNA-p1	Tb927.11.4450:mRNA-p1	Tb927.11.4450	ALBA2	RNA.binding	0	1	0	0	2	2	2	1	2	2	2	0	1	0	0	0	2	0	1	0	0	0	2	0	1	0	0	0	2	23.9	23.9	23.9	12.757	117	117	0	6.0365	0	11.1	0	0	0	23.9	62800000
	Tb927.5.760:mRNA-p1	Tb927.5.760:mRNA-p1	Tb927.5.760	CSBPII_45	RNA.binding	0	0	0	0	1	1	1	1	1	1	1	0	0	0	0	1	0	0	0	0	0	1	0	0	0	0	0	1	0	3.5	3.5	3.5	79.048	740	740	0	8.1735	0	0	0	0	3.5	0	15900000
	Tb927.11.10810:mRNA-p1	Tb927.11.10810:mRNA-p1	Tb927.11.10810	PUF11	RNA.binding	0	0	0	0	1	1	1	1	1	1	1	0	0	0	0	1	0	0	0	0	0	1	0	0	0	0	0	1	0	1.1	1.1	1.1	94.498	846	846	0.0057208	1.3685	0	0	0	0	1.1	0	12100000
	Tb927.8.4450:mRNA-p1	Tb927.8.4450:mRNA-p1	Tb927.8.4450	RBP11	RNA.binding	0	0	0	0	1	1	1	1	1	1	1	0	0	0	0	1	0	0	0	0	0	1	0	0	0	0	0	1	0	1.6	1.6	1.6	47.214	428	428	0.0086957	1.1533	0	0	0	0	1.6	0	20900000
	Tb927.11.16590:mRNA-p1	Tb927.11.16590:mRNA-p1	Tb927.11.16590	RBP37	RNA.binding	0	0	0	0	1	1	1	1	1	1	1	0	0	0	0	1	0	0	0	0	0	1	0	0	0	0	0	1	0	1.5	1.5	1.5	49.84	457	457	0.0067797	1.2716	0	0	0	0	1.5	0	0
	Tb927.11.14220:mRNA-p1	Tb927.11.14220:mRNA-p1	Tb927.11.14220	REG9.1 required for regulaltion of ESAG9	RNA.binding	0	0	0	0	1	1	1	1	1	1	1	0	0	0	0	1	1	0	0	0	0	1	1	0	0	0	0	1	1	2.5	2.5	2.5	54.405	516	516	0	2.4614	0	0	0	0	2.5	2.5	201000000
	Tb927.10.1540:mRNA-p1	Tb927.10.1540:mRNA-p1	Tb927.10.1540	ZC3H30	RNA.binding	0	0	0	0	1	1	1	1	1	1	1	0	0	0	0	0	1	0	0	0	0	0	1	0	0	0	0	0	1	2	2	2	60.136	564	564	0.0013123	2.0867	0	0	0	0	0	2	20100000
	Tb927.10.12740:mRNA-p1	Tb927.10.12740:mRNA-p1	Tb927.10.12740	ZC3H35	RNA.binding	0	0	0	0	1	1	1	1	1	1	1	0	0	0	0	1	0	0	0	0	0	1	0	0	0	0	0	1	0	1.9	1.9	1.9	51.324	474	474	0	2.9487	0	0	0	0	1.9	0	63500000
	Tb927.10.12800:mRNA-p1	Tb927.10.12800:mRNA-p1	Tb927.10.12800	ZC3H38	RNA.binding	0	0	0	0	1	1	1	1	1	1	1	0	0	0	0	1	0	0	0	0	0	1	0	0	0	0	0	1	0	5.4	5.4	5.4	30.977	280	280	0	4.0527	0	0	0	0	5.4	0	18800000
	Tb927.10.14930:mRNA-p1	Tb927.10.14930:mRNA-p1	Tb927.10.14930	ZC3H39	RNA.binding	0	0	0	0	1	1	1	1	1	1	1	0	0	0	0	1	0	0	0	0	0	1	0	0	0	0	0	1	0	4.9	4.9	4.9	31.519	285	285	0.002451	1.7631	0	0	0	0	4.9	0	17500000
	Tb927.10.14950:mRNA-p1	Tb927.10.14950:mRNA-p1	Tb927.10.14950	ZC3H40	RNA.binding	0	0	0	0	1	1	1	1	1	1	1	0	0	0	0	1	0	0	0	0	0	1	0	0	0	0	0	1	0	4.9	4.9	4.9	46.194	432	432	0.0012953	2.0314	0	0	0	0	4.9	0	19300000
	Tb927.11.16550:mRNA-p1	Tb927.11.16550:mRNA-p1	Tb927.11.16550	ZC3H46	RNA.binding	0	0	0	0	1	1	1	1	1	1	1	0	0	0	0	0	1	0	0	0	0	0	1	0	0	0	0	0	1	1.4	1.4	1.4	56.434	510	510	0.0097297	1.1318	0	0	0	0	0	1.4	39300000
	Tb927.3.720:mRNA-p1	Tb927.3.720:mRNA-p1	Tb927.3.720	ZFP3	RNA.binding	0	0	0	0	1	1	1	1	1	1	1	0	0	0	0	0	1	0	0	0	0	0	1	0	0	0	0	0	1	16.2	16.2	16.2	14.168	130	130	0	3.4131	0	0	0	0	0	16.2	12900000
+	Tb927.6.4770:mRNA-p1	Tb927.6.4770:mRNA-p1	Tb927.6.4770	MKT1	RNA.degradation	0	1	1	1	33	33	33	1	33	33	33	1	0	0	17	26	12	1	0	0	17	26	12	1	0	0	17	26	12	48.3	48.3	48.3	83.306	735	735	0	240.83	1.2	0	0	28.6	44.4	15.9	6730000000
	Tb927.10.1510:mRNA-p1	Tb927.10.1510:mRNA-p1	Tb927.10.1510	NOT1	RNA.degradation	0	4	1	1	31	31	31	1	31	31	31	4	0	0	20	19	2	4	0	0	20	19	2	4	0	0	20	19	2	17.2	17.2	17.2	259.12	2326	2326	0	198.43	1.9	0	0	12.1	11.4	1	1090000000
+	Tb927.10.10850:mRNA-p1	Tb927.10.10850:mRNA-p1	Tb927.10.10850	AGO1	RNA.degradation	0	0	1	1	21	21	21	1	21	21	21	0	0	0	3	14	10	0	0	0	3	14	10	0	0	0	3	14	10	27.4	27.4	27.4	99.184	903	903	0	57.04	0	0	0	4.8	18.1	12.6	1590000000
+	Tb927.10.1490:mRNA-p1;Tb11.v5.0875.1-p1	Tb927.10.1490:mRNA-p1	Tb927.10.1490	MKT1L	RNA.degradation	0	0	1	1	19;4	19;4	19;4	2	19	19	19	0	0	0	6	15	7	0	0	0	6	15	7	0	0	0	6	15	7	17.8	17.8	17.8	134.81	1220	1220;595	0	124.56	0	0	0	6.6	13.7	8	1020000000
+	Tb927.8.4540:mRNA-p1	Tb927.8.4540:mRNA-p1	Tb927.8.4540	PBP1	RNA.degradation	0	0	1	1	13	13	13	1	13	13	13	0	0	0	5	9	6	0	0	0	5	9	6	0	0	0	5	9	6	31.8	31.8	31.8	59.599	550	550	0	92.094	0	0	0	13.5	26.5	13.3	1870000000
	Tb927.10.3990:mRNA-p1	Tb927.10.3990:mRNA-p1	Tb927.10.3990	DHH1	RNA.degradation	0	1	0	1	27	27	27	1	27	27	27	1	1	1	1	20	21	1	1	1	1	20	21	1	1	1	1	20	21	69.2	69.2	69.2	46.468	406	406	0	166.29	2.5	2	3.4	2.7	56.9	59.6	6330000000
	Tb927.5.2140:mRNA-p1	Tb927.5.2140:mRNA-p1	Tb927.5.2140	UPF1	RNA.degradation	0	0	0	0	5	5	5	1	5	5	5	0	0	0	0	2	4	0	0	0	0	2	4	0	0	0	0	2	4	7.8	7.8	7.8	93.324	842	842	0	15.053	0	0	0	0	3.7	6.2	169000000
	Tb927.3.2490:mRNA-p1	Tb927.3.2490:mRNA-p1	Tb927.3.2490	P-loop nucloside phosphate hydrolase, PH domain-like	RNA.degradation	0	0	0	0	3	3	3	1	3	3	3	0	0	0	0	3	0	0	0	0	0	3	0	0	0	0	0	3	0	2.7	2.7	2.7	110.07	963	963	0	4.385	0	0	0	0	2.7	0	37800000
	Tb11.v5.0553.1-p1;Tb927.6.1670:pseudogenic_transcript-p1	Tb11.v5.0553.1-p1;Tb927.6.1670:pseudogenic_transcript-p1	Tb927.6.1670	PAN2	RNA.degradation	0	0	0	0	2;1	2;1	2;1	2	2	2	2	0	0	0	0	2	0	0	0	0	0	2	0	0	0	0	0	2	0	4.1	4.1	4.1	60.133	536	536;1086	0	4.649	0	0	0	0	4.1	0	23000000
	Tb11.v5.0807.1-p1;Tb927.9.13510:mRNA-p1	Tb11.v5.0807.1-p1;Tb927.9.13510:mRNA-p1	Tb927.9.13510	PARN-3	RNA.degradation	0	0	0	0	2;2	2;2	2;2	2	2	2	2	0	0	0	0	0	2	0	0	0	0	0	2	0	0	0	0	0	2	3.7	3.7	3.7	64.261	566	566;623	0	3.4753	0	0	0	0	0	3.7	19700000
	Tb927.7.4900:mRNA-p1;Tb11.v5.0171.1-p1	Tb927.7.4900:mRNA-p1;Tb11.v5.0171.1-p1	Tb927.7.4900	XRNA	RNA.degradation	0	1	0	0	2;2	2;2	2;2	2	2	2	2	1	0	0	1	1	0	1	0	0	1	1	0	1	0	0	1	1	0	1.6	1.6	1.6	158.67	1418	1418;1418	0	3.7182	1.1	0	0	1.1	0.5	0	34000000
	Tb927.6.600:mRNA-p1	Tb927.6.600:mRNA-p1	Tb927.6.600	CAF1	RNA.degradation	0	0	0	0	1	1	1	1	1	1	1	0	0	0	0	1	1	0	0	0	0	1	1	0	0	0	0	1	1	5.1	5.1	5.1	38.863	351	351	0	5.671	0	0	0	0	5.1	5.1	49800000
	Tb927.11.8290:mRNA-p1	Tb927.11.8290:mRNA-p1	Tb927.11.8290	DIS3L2, RNaseB motif protein, no PIN domain	RNA.degradation	0	0	0	0	1	1	1	1	1	1	1	0	0	0	0	1	0	0	0	0	0	1	0	0	0	0	0	1	0	1.3	1.3	1.3	101.68	895	895	0.0035885	1.6328	0	0	0	0	1.3	0	29100000
	Tb927.9.9060:mRNA-p1	Tb927.9.9060:mRNA-p1	Tb927.9.9060	LSM12	RNA.degradation	0	0	0	0	1	1	1	1	1	1	1	0	0	0	0	1	0	0	0	0	0	1	0	0	0	0	0	1	0	7.9	7.9	7.9	21.06	190	190	0.0012579	1.8882	0	0	0	0	7.9	0	62300000
	Tb927.10.8720:mRNA-p1	Tb927.10.8720:mRNA-p1	Tb927.10.8720	NOT10	RNA.degradation	0	0	0	0	1	1	1	1	1	1	1	0	0	0	0	1	1	0	0	0	0	1	1	0	0	0	0	1	1	1.8	1.8	1.8	61.501	555	555	0	3.5186	0	0	0	0	1.8	1.8	13100000
+	Tb927.3.2600:mRNA-p1	Tb927.3.2600:mRNA-p1	Tb927.3.2600	ATP-dependent DEAD/H RNA helicase, putative, no clear yeast homologue	RNA.helicase	0	0	1	1	37	37	37	1	37	37	37	0	0	0	11	30	11	0	0	0	11	30	11	0	0	0	11	30	11	22.7	22.7	22.7	244.99	2170	2170	0	159.16	0	0	0	8	18.8	5.4	2280000000
	Tb927.10.540:mRNA-p1;Tb11.v5.0414.1-p1	Tb927.10.540:mRNA-p1;Tb11.v5.0414.1-p1	Tb927.10.540	ATP-dependent DEAD/H RNA helicase, Named as orthologue of TcSUB2, RNAi causes poly(A) accumulation in nucleus.	RNA.helicase	0	1	0	0	15;15	15;15	15;15	2	15	15	15	0	1	0	0	10	11	0	1	0	0	10	11	0	1	0	0	10	11	38.1	38.1	38.1	49.226	436	436;436	0	56.987	0	2.3	0	0	27.1	29.8	1400000000
	Tb927.9.13610:mRNA-p1	Tb927.9.13610:mRNA-p1	Tb927.9.13610	DEAD-box helicase	RNA.helicase	0	0	0	1	10	10	10	1	10	10	10	0	0	0	1	9	1	0	0	0	1	9	1	0	0	0	1	9	1	10.5	10.5	10.5	149.24	1330	1330	0	29.519	0	0	0	1.2	9.4	1.1	182000000
	Tb927.2.4710:mRNA-p1	Tb927.2.4710:mRNA-p1	Tb927.2.4710	TRRM1	RNA.processing	0	6	1	1	19	19	19	1	19	19	19	6	1	0	7	17	7	6	1	0	7	17	7	6	1	0	7	17	7	45.1	45.1	45.1	49.983	441	441	0	87.696	15.2	4.3	0	19	41.3	18.4	3680000000
	Tb927.8.900:mRNA-p1	Tb927.8.900:mRNA-p1	Tb927.8.900	splicing factor TSR1 (TSR1)	RNA.processing	0	4	1	1	13	13	13	1	13	13	13	4	1	0	7	11	5	4	1	0	7	11	5	4	1	0	7	11	5	38.7	38.7	38.7	37.469	328	328	0	53.846	15.2	3.7	0	24.4	33.2	15.9	3580000000
	Tb927.2.3880:mRNA-p1	Tb927.2.3880:mRNA-p1	Tb927.2.3880	HNRNPH/F	RNA.processing	0	7	0	0	13	13	13	1	13	13	13	0	7	0	0	8	6	0	7	0	0	8	6	0	7	0	0	8	6	28.3	28.3	28.3	55.134	487	487	0	39.625	0	17	0	0	16.6	14	488000000
	Tb927.7.6980:mRNA-p1	Tb927.7.6980:mRNA-p1	Tb927.7.6980	U2 splicing factor putative, SF3b(SAP)130	RNA.processing	0	0	0	1	4	4	4	1	4	4	4	0	0	0	2	1	2	0	0	0	2	1	2	0	0	0	2	1	2	2.5	2.5	2.5	194.95	1834	1834	0	4.6406	0	0	0	1.5	0.5	1.3	33800000
	Tb927.7.3780:mRNA-p1	Tb927.7.3780:mRNA-p1	Tb927.7.3780	PAP2 poly(A) polymerase, major PAP, nuclear, associated with MTR4 complex	RNA.processing	0	0	0	0	4	4	4	1	4	4	4	0	0	0	0	1	4	0	0	0	0	1	4	0	0	0	0	1	4	6.3	6.3	6.3	74.43	687	687	0	3.0348	0	0	0	0	1.6	6.3	73400000
	Tb927.2.5240:mRNA-p1	Tb927.2.5240:mRNA-p1	Tb927.2.5240	PRP19	RNA.processing	0	0	0	0	4	4	4	1	4	4	4	0	0	0	0	3	4	0	0	0	0	3	4	0	0	0	0	3	4	9	9	9	54.268	509	509	0	44.2	0	0	0	0	6.9	9	352000000
	Tb927.4.1340:mRNA-p1	Tb927.4.1340:mRNA-p1	Tb927.4.1340	CPSF73	RNA.processing	0	0	0	0	3	3	3	1	3	3	3	0	0	0	0	3	0	0	0	0	0	3	0	0	0	0	0	3	0	6.2	6.2	6.2	85.313	770	770	0	6.2361	0	0	0	0	6.2	0	28800000
	Tb927.11.14560:mRNA-p1	Tb927.11.14560:mRNA-p1	Tb927.11.14560	CPSF160	RNA.processing	0	0	0	0	2	2	2	1	2	2	2	0	0	0	0	2	0	0	0	0	0	2	0	0	0	0	0	2	0	1.1	1.1	1.1	159.06	1452	1452	0.0024752	1.8001	0	0	0	0	1.1	0	25500000
	Tb927.9.14120:mRNA-p1	Tb927.9.14120:mRNA-p1	Tb927.9.14120	NIF superfamily phosphatase domain, possible splicing factor	RNA.processing	0	0	0	0	2	2	2	1	2	2	2	0	0	0	0	0	2	0	0	0	0	0	2	0	0	0	0	0	2	3.2	3.2	3.2	59.066	531	531	0	3.3527	0	0	0	0	0	3.2	15800000
	Tb927.3.3160:mRNA-p1	Tb927.3.3160:mRNA-p1	Tb927.3.3160	PAP1 poly(A) polymerase. Cis-spliced. cytosolic	RNA.processing	0	0	0	0	2	2	2	1	2	2	2	0	0	0	0	2	0	0	0	0	0	2	0	0	0	0	0	2	0	6.2	6.2	6.2	55.035	487	487	0	2.9023	0	0	0	0	6.2	0	33400000
	Tb927.7.1390:mRNA-p1	Tb927.7.1390:mRNA-p1	Tb927.7.1390	RBSR2	RNA.processing	0	0	0	0	2	2	2	1	2	2	2	0	0	0	0	2	0	0	0	0	0	2	0	0	0	0	0	2	0	12	12	12	20.679	184	184	0	3.6736	0	0	0	0	12	0	123000000
	Tb927.5.2290:mRNA-p1	Tb927.5.2290:mRNA-p1	Tb927.5.2290	U5 splicing factor U5-200K, putative or BRR2 homologue	RNA.processing	0	0	0	0	2	2	2	1	2	2	2	0	0	0	0	2	0	0	0	0	0	2	0	0	0	0	0	2	0	1.2	1.2	1.2	249.28	2237	2237	0	2.5915	0	0	0	0	1.2	0	46600000
	Tb927.6.1830:mRNA-p1	Tb927.6.1830:mRNA-p1	Tb927.6.1830	CstF50	RNA.processing	0	0	0	0	1	1	1	1	1	1	1	0	0	0	0	1	0	0	0	0	0	1	0	0	0	0	0	1	0	3.4	3.4	3.4	49.927	442	442	0	2.4774	0	0	0	0	3.4	0	19200000
	Tb927.9.11110:mRNA-p1	Tb927.9.11110:mRNA-p1	Tb927.9.11110	PRP8 protein homologue,U5 snRNA-associated splicing factor	RNA.processing	0	0	0	0	1	1	1	1	1	1	1	0	0	0	0	1	0	0	0	0	0	1	0	0	0	0	0	1	0	0.3	0.3	0.3	277	2403	2403	0.006734	1.2444	0	0	0	0	0.3	0	0
	Tb927.6.2700:mRNA-p1	Tb927.6.2700:mRNA-p1	Tb927.6.2700	small nuclear ribonucleoprotein Sm-E	RNA.processing	0	0	0	0	1	1	1	1	1	1	1	0	0	0	0	1	1	0	0	0	0	1	1	0	0	0	0	1	1	14	14	14	9.6554	86	86	0.0067492	1.2487	0	0	0	0	14	14	37500000
	Tb927.8.7490:mRNA-p1;Tb927.4.4930:mRNA-p1	Tb927.8.7490:mRNA-p1;Tb927.4.4930:mRNA-p1	Tb927.8.7490	Symplekin	RNA.processing	0	0	0	0	1;1	1;1	1;1	2	1	1	1	0	0	0	0	1	0	0	0	0	0	1	0	0	0	0	0	1	0	0.9	0.9	0.9	157.97	1445	1445;1445	0.0036145	1.6557	0	0	0	0	0.9	0	11000000
	Tb927.11.15690:mRNA-p1	Tb927.11.15690:mRNA-p1	Tb927.11.15690	U5 snRNP-associated 102 kDa protein,U5-102K putative	RNA.processing	0	0	0	0	1	1	1	1	1	1	1	0	0	0	0	1	0	0	0	0	0	1	0	0	0	0	0	1	0	1	1	1	111.07	1009	1009	0.0036058	1.6518	0	0	0	0	1	0	0
	Tb927.6.3810.1:mRNA-p1;Tb927.6.3810.2:mRNA-p1	Tb927.6.3810.1:mRNA-p1;Tb927.6.3810.2:mRNA-p1	Tb927.6.3810	Possible non-canonical poly(A) polymerase. PAP/OAS1 substrate-binding domain (poly(A) polymerase substrate binding)	RNA.processing	0	0	0	0	1;1	1;1	1;1	2	1	1	1	0	0	0	0	1	0	0	0	0	0	1	0	0	0	0	0	1	0	2.9	2.9	2.9	50.719	456	456;511	0	2.4257	0	0	0	0	2.9	0	22700000
	Tb927.11.3490:mRNA-p1	Tb927.11.3490:mRNA-p1	Tb927.11.3490	hypothetical protein, conserved, no domains, no good BLASTp matches	RNA.synthesis	0	0	0	1	17	17	17	1	17	17	17	0	0	0	1	8	10	0	0	0	1	8	10	0	0	0	1	8	10	25.1	25.1	25.1	87.8	798	798	0	95.445	0	0	0	2.1	13.5	15.7	385000000
	Tb927.3.5620:mRNA-p1	Tb927.3.5620:mRNA-p1	Tb927.3.5620	FACT complex subunit SPT16	RNA.synthesis	0	0	0	0	11	11	11	1	11	11	11	0	0	0	0	9	4	0	0	0	0	9	4	0	0	0	0	9	4	12.1	12.1	12.1	113.69	1022	1022	0	34.627	0	0	0	0	11	5.8	276000000
	Tb927.4.3810:mRNA-p1	Tb927.4.3810:mRNA-p1	Tb927.4.3810	DNA-directed RNA polymerase II subunit 2, p(RPB2)	RNA.synthesis	0	0	0	0	5	5	5	1	5	5	5	0	0	0	0	5	0	0	0	0	0	5	0	0	0	0	0	5	0	5.5	5.5	5.5	134.59	1190	1190	0	36.992	0	0	0	0	5.5	0	99900000
	Tb927.4.5020:mRNA-p1;Tb927.8.7400:mRNA-p1;Tb11.v5.0504.1-p1	Tb927.4.5020:mRNA-p1;Tb927.8.7400:mRNA-p1;Tb11.v5.0504.1-p1	Tb927.4.5020	RNA polymerase IIA largest subunit (RPB1)	RNA.synthesis	0	0	0	0	3;3;2	3;3;2	3;3;2	3	3	3	3	0	0	0	0	3	0	0	0	0	0	3	0	0	0	0	0	3	0	1.4	1.4	1.4	196.72	1765	1765;1765;847	0	4.173	0	0	0	0	1.4	0	65300000
	Tb927.2.5810:mRNA-p1	Tb927.2.5810:mRNA-p1	Tb927.2.5810	SPT6 transcription elongation	RNA.synthesis	0	0	0	0	3	3	3	1	3	3	3	0	0	0	0	3	0	0	0	0	0	3	0	0	0	0	0	3	0	2.7	2.7	2.7	174.02	1543	1543	0	6.591	0	0	0	0	2.7	0	33500000
	Tb927.10.14810:mRNA-p1	Tb927.10.14810:mRNA-p1	Tb927.10.14810	Homologue of yeast MBF1 - Transcriptional coactivator that bridges the DNA-binding region of Gcn4p and TATA-binding protein Spt15p; suppressor of frameshift mutations. Pedominantly in yeast cytosol. multiprotein binding factor and helix-turn-helix domain. (in UPF1-TAP)	RNA.synthesis	0	1	0	0	3	3	3	1	3	3	3	0	0	1	0	2	3	0	0	1	0	2	3	0	0	1	0	2	3	15	15	15	17.974	160	160	0	3.8329	0	0	5	0	9.4	15	147000000
	Tb927.3.3220:mRNA-p1	Tb927.3.3220:mRNA-p1	Tb927.3.3220	CTR9, part of PAF complex	RNA.synthesis	0	0	0	0	2	2	2	1	2	2	2	0	0	0	0	2	0	0	0	0	0	2	0	0	0	0	0	2	0	2.4	2.4	2.4	101.23	901	901	0	2.3162	0	0	0	0	2.4	0	14400000
	Tb927.10.13320:mRNA-p1	Tb927.10.13320:mRNA-p1	Tb927.10.13320	DNA-directed RNA polymerases II subunit, putative (RPB5)	RNA.synthesis	0	0	0	0	2	2	2	1	2	2	2	0	0	0	0	1	1	0	0	0	0	1	1	0	0	0	0	1	1	10.5	10.5	10.5	25.21	219	219	0	3.7971	0	0	0	0	6.8	3.7	48800000
	Tb11.v5.0723.1-p1;Tb927.8.5090:mRNA-p1	Tb11.v5.0723.1-p1;Tb927.8.5090:mRNA-p1	Tb927.8.5090	RPA1 RNA polymerase I largest subunit (RPA190)	RNA.synthesis	0	0	0	0	2;2	2;2	2;2	2	2	2	2	0	0	0	0	2	0	0	0	0	0	2	0	0	0	0	0	2	0	2.5	2.5	2.5	84.066	757	757;1781	0	2.8129	0	0	0	0	2.5	0	20700000
	Tb927.11.630:mRNA-p1	Tb927.11.630:mRNA-p1	Tb927.11.630	RPA2 RNA polymerase I second largest subunit (RPA134)	RNA.synthesis	0	0	0	0	2	2	2	1	2	2	2	0	0	0	0	2	0	0	0	0	0	2	0	0	0	0	0	2	0	1.4	1.4	1.4	179.49	1596	1596	0.0097192	1.1264	0	0	0	0	1.4	0	34300000
	Tb927.11.8310:mRNA-p1	Tb927.11.8310:mRNA-p1	Tb927.11.8310	class I transcription factor A, subunit 4 (CITFA-4)	RNA.synthesis	0	0	0	0	1	1	1	1	1	1	1	0	0	0	0	0	1	0	0	0	0	0	1	0	0	0	0	0	1	3.9	3.9	3.9	42.733	388	388	0	6.6396	0	0	0	0	0	3.9	22600000
	Tb11.v5.0608.1-p1;Tb927.10.2780:mRNA-p1	Tb11.v5.0608.1-p1;Tb927.10.2780:mRNA-p1	Tb927.10.2780	DNA-directed RNA polymerase iii largest subunit,t (RPC160)	RNA.synthesis	0	0	0	0	1;1	1;1	1;1	2	1	1	1	0	0	0	0	1	0	0	0	0	0	1	0	0	0	0	0	1	0	2.8	2.8	2.8	60.323	543	543;1530	0.0012626	1.9044	0	0	0	0	2.8	0	15700000
	Tb927.1.540:mRNA-p1	Tb927.1.540:mRNA-p1	Tb927.1.540	DNA-directed RNA polymerase III, putative, (RPC128)	RNA.synthesis	0	0	0	0	1	1	1	1	1	1	1	0	0	0	0	0	1	0	0	0	0	0	1	0	0	0	0	0	1	0.8	0.8	0.8	126.58	1129	1129	1	-2	0	0	0	0	0	0.8	25900000
	Tb927.10.15170:mRNA-p1	Tb927.10.15170:mRNA-p1	Tb927.10.15170	Homologue of yeast MBF1 - Transcriptional coactivator that bridges the DNA-binding region of Gcn4p and TATA-binding protein Spt15p; suppressor of frameshift mutations. Pedominantly in yeast cytosol. multiprotein binding factor and helix-turn-helix domain. (in UPF1-TAP)	RNA.synthesis	0	0	0	0	1	1	1	1	1	1	1	0	0	0	0	1	0	0	0	0	0	1	0	0	0	0	0	1	0	1	1	1	77.347	695	695	0.0046729	1.4898	0	0	0	0	1	0	16000000
	Tb927.8.1510:mRNA-p1	Tb927.8.1510:mRNA-p1	Tb927.8.1510	ATP-dependent DEAD/H RNA helicase, putative Dbp3, ribosome biogenesis? Cis-spliced	rRNA.tRNA.process	0	1	0	1	11	11	11	1	11	11	11	1	0	0	1	5	7	1	0	0	1	5	7	1	0	0	1	5	7	23.6	23.6	23.6	62.439	569	569	0	48.164	2.5	0	0	2.5	10.4	15.6	540000000
	Tb927.10.170:mRNA-p1	Tb927.10.170:mRNA-p1	Tb927.10.170	pseudouridine synthase, Cbf5p	rRNA.tRNA.process	0	0	0	0	7	7	7	1	7	7	7	0	0	0	0	5	3	0	0	0	0	5	3	0	0	0	0	5	3	14.8	14.8	14.8	48.285	427	427	0	14.739	0	0	0	0	11.2	5.9	240000000
	Tb927.9.2900:mRNA-p1	Tb927.9.2900:mRNA-p1	Tb927.9.2900	UTP10 (NOP287)	rRNA.tRNA.process	0	0	0	0	4	4	4	1	4	4	4	0	0	0	1	3	0	0	0	0	1	3	0	0	0	0	1	3	0	1.6	1.6	1.6	287.19	2631	2631	0	6.2069	0	0	0	0.4	1.2	0	21200000
	Tb927.10.13180:mRNA-p1	Tb927.10.13180:mRNA-p1	Tb927.10.13180	Nrap protein, putative	rRNA.tRNA.process	0	0	0	0	3	3	3	1	3	3	3	0	0	0	0	3	0	0	0	0	0	3	0	0	0	0	0	3	0	2.4	2.4	2.4	136.67	1236	1236	0	2.4074	0	0	0	0	2.4	0	35500000
	Tb927.5.2530:mRNA-p1	Tb927.5.2530:mRNA-p1	Tb927.5.2530	Kre33 homologue, required for biogenesis of ribsomal small subunit in yeast	rRNA.tRNA.process	0	0	0	0	2	2	2	1	2	2	2	0	0	0	0	1	1	0	0	0	0	1	1	0	0	0	0	1	1	2.4	2.4	2.4	114.91	1039	1039	0	3.9467	0	0	0	0	1.5	0.9	38700000
	Tb927.5.4420:mRNA-p1;Tb05.5K5.70:mRNA-p1	Tb927.5.4420:mRNA-p1;Tb05.5K5.70:mRNA-p1	Tb927.5.4420	nucleolar RNA helicase 2 human, DDX50 Mouse	rRNA.tRNA.process	0	0	0	0	2;2	2;2	2;2	2	2	2	2	0	0	0	0	1	1	0	0	0	0	1	1	0	0	0	0	1	1	3	3	3	68.786	632	632;632	0	4.6171	0	0	0	0	1.9	1.1	36200000
	Tb927.5.4270:mRNA-p1	Tb927.5.4270:mRNA-p1	Tb927.5.4270	ATP-dependent DEAD/H RNA helicase, putative Hca4, ribosome biogenesis?	rRNA.tRNA.process	0	0	0	0	1	1	1	1	1	1	1	0	0	0	0	1	0	0	0	0	0	1	0	0	0	0	0	1	0	1.2	1.2	1.2	93.954	828	828	0	3.8032	0	0	0	0	1.2	0	12100000
	Tb927.10.6290:mRNA-p1;Tb11.v5.0277.1-p1	Tb927.10.6290:mRNA-p1;Tb11.v5.0277.1-p1	Tb927.10.6290	ATP-dependent DEAD/H RNA helicase, putative Rrp3, ribosome biogenesis?	rRNA.tRNA.process	0	0	0	0	1;1	1;1	1;1	2	1	1	1	0	0	0	0	0	1	0	0	0	0	0	1	0	0	0	0	0	1	2.5	2.5	2.5	57.578	512	512;512	0.0012937	2.0123	0	0	0	0	0	2.5	0
	Tb927.6.2650:mRNA-p1	Tb927.6.2650:mRNA-p1	Tb927.6.2650	Homologue of yeast SGD1, small ribosomal subunit biogenesis. MA3 domain	rRNA.tRNA.process	0	0	0	0	1	1	1	1	1	1	1	0	0	0	0	0	1	0	0	0	0	0	1	0	0	0	0	0	1	2.9	2.9	2.9	84.541	757	757	0.0035503	1.5609	0	0	0	0	0	2.9	11000000
	Tb927.11.5480:mRNA-p1	Tb927.11.5480:mRNA-p1	Tb927.11.5480	N-terminus homologue of human histone mRNA 3' exoribonuclease, C-terminus Homologue of yeast TPT1, tRNA 2'-phosphotransferase involved in last step ot tRNA splicing	rRNA.tRNA.process	0	0	0	0	1	1	1	1	1	1	1	0	0	0	0	1	0	0	0	0	0	1	0	0	0	0	0	1	0	1.9	1.9	1.9	60.775	540	540	1	-2	0	0	0	0	1.9	0	44300000
	Tb927.11.3120:mRNA-p1	Tb927.11.3120:mRNA-p1	Tb927.11.3120	nucleolar GTP-binding protein 1 (NOG1)	rRNA.tRNA.process	0	0	0	0	1	1	1	1	1	1	1	0	0	0	0	1	0	0	0	0	0	1	0	0	0	0	0	1	0	1.1	1.1	1.1	74.753	655	655	0.0087146	1.161	0	0	0	0	1.1	0	13200000
	Tb927.4.3840:mRNA-p1	Tb927.4.3840:mRNA-p1	Tb927.4.3840	nucleolar protein, putative	rRNA.tRNA.process	0	0	0	0	1	1	1	1	1	1	1	0	0	0	0	1	0	0	0	0	0	1	0	0	0	0	0	1	0	1.9	1.9	1.9	65.107	579	579	0.002454	1.765	0	0	0	0	1.9	0	11800000
	Tb927.9.8200:mRNA-p1	Tb927.9.8200:mRNA-p1	Tb927.9.8200	PES1	rRNA.tRNA.process	0	0	0	0	1	1	1	1	1	1	1	0	0	0	0	1	0	0	0	0	0	1	0	0	0	0	0	1	0	1.5	1.5	1.5	76.419	658	658	0.0035461	1.5595	0	0	0	0	1.5	0	33700000
	Tb927.10.11990:mRNA-p1	Tb927.10.11990:mRNA-p1	Tb927.10.11990	RNA-binding protein NIP7	rRNA.tRNA.process	0	0	0	0	1	1	1	1	1	1	1	0	0	0	0	1	0	0	0	0	0	1	0	0	0	0	0	1	0	3.3	3.3	3.3	23.952	215	215	0.0036276	1.6694	0	0	0	0	3.3	0	9490000
	Tb927.1.1370:mRNA-p1;Tb11.v5.0391.1-p1	Tb927.1.1370:mRNA-p1;Tb11.v5.0391.1-p1	Tb927.1.1370	rRNA biogenesis protein, putative	rRNA.tRNA.process	0	0	0	0	1;1	1;1	1;1	2	1	1	1	0	0	0	0	1	0	0	0	0	0	1	0	0	0	0	0	1	0	1.3	1.3	1.3	75.103	679	679;679	0	2.6537	0	0	0	0	1.3	0	23800000
	Tb927.11.4900:mRNA-p1	Tb927.11.4900:mRNA-p1	Tb927.11.4900	guanine nucleotide-binding beta subunit-like protein,WD40/YVTN repeat-like-containing protein	Signalling	0	0	0	1	16	16	16	1	16	16	16	0	0	0	1	11	12	0	0	0	1	11	12	0	0	0	1	11	12	26.2	26.2	26.2	61.857	560	560	0	47.046	0	0	0	2.3	18.9	19.6	1610000000
	Tb927.11.9530:mRNA-p1	Tb927.11.9530:mRNA-p1	Tb927.11.9530	14-3-3-I protein	Signalling	0	2	0	0	12	12	12	1	12	12	12	0	0	2	0	9	8	0	0	2	0	9	8	0	0	2	0	9	8	46.6	46.6	46.6	30.31	262	262	0	323.31	0	0	7.6	0	43.5	35.1	1750000000
	Tb927.11.6870:mRNA-p1	Tb927.11.6870:mRNA-p1	Tb927.11.6870	14-3-3 protein	Signalling	0	0	0	0	10	10	10	1	10	10	10	0	0	0	0	7	6	0	0	0	0	7	6	0	0	0	0	7	6	39.7	39.7	39.7	29.196	252	252	0	24.72	0	0	0	0	29.8	21.8	549000000
	Tb927.9.5040:mRNA-p1;Tb927.9.5100:mRNA-p1	Tb927.9.5040:mRNA-p1;Tb927.9.5100:mRNA-p1	Tb927.9.5040	cAMP-specific phosphodiesterase (PDEB1)	Signalling	0	0	0	0	7;5	7;5	7;5	2	7	7	7	0	0	0	0	4	3	0	0	0	0	4	3	0	0	0	0	4	3	9.1	9.1	9.1	103.65	930	930;925	0	75.077	0	0	0	0	6.3	2.8	343000000
	Tb927.3.1060:mRNA-p1	Tb927.3.1060:mRNA-p1	Tb927.3.1060	3' end of CARP4, joined to Tb927.3.1040	Signalling	0	0	0	0	5	5	5	1	5	5	5	0	0	0	0	3	2	0	0	0	0	3	2	0	0	0	0	3	2	6.3	6.3	6.3	90.126	779	779	0	16.257	0	0	0	0	3.5	2.8	83800000
	Tb927.7.5340:mRNA-p1	Tb927.7.5340:mRNA-p1	Tb927.7.5340	CARP3	Signalling	0	0	0	0	4	4	4	1	4	4	4	0	0	0	0	4	0	0	0	0	0	4	0	0	0	0	0	4	0	7.8	7.8	7.8	56.822	498	498	0	11.391	0	0	0	0	7.8	0	136000000
	Tb05.5K5.110:mRNA-p1;Tb927.5.4460:mRNA-p1;Tb11.v5.0866.1-p1	Tb05.5K5.110:mRNA-p1;Tb927.5.4460:mRNA-p1;Tb11.v5.0866.1-p1	Tb05.5K5.110	major vault protein, putative	Signalling	0	0	0	0	4;4;2	4;4;2	4;4;2	3	4	4	4	0	0	0	0	1	3	0	0	0	0	1	3	0	0	0	0	1	3	4.8	4.8	4.8	94.06	838	838;838;519	0	6.8831	0	0	0	0	1.6	3.2	85100000
	Tb927.11.3320.1:mRNA-p1;Tb927.11.3320.2:mRNA-p1	Tb927.11.3320.1:mRNA-p1;Tb927.11.3320.2:mRNA-p1	Tb927.11.3320	ras-like small GTPase, putative (TbGTR)	Signalling	0	0	0	0	3;3	3;3	3;3	2	3	3	3	0	0	0	0	1	2	0	0	0	0	1	2	0	0	0	0	1	2	6.8	6.8	6.8	40.39	355	355;407	0.0012755	1.9737	0	0	0	0	2.8	3.9	30400000
	Tb927.3.5550:mRNA-p1	Tb927.3.5550:mRNA-p1	Tb927.3.5550	small GTP-binding protein, putative (TbRX1)	Signalling	0	0	0	0	3	3	3	1	3	3	3	0	0	0	0	1	3	0	0	0	0	1	3	0	0	0	0	1	3	18.6	18.6	18.6	20.638	183	183	0	8.7451	0	0	0	0	7.1	18.6	154000000
	Tb927.11.6270:mRNA-p1	Tb927.11.6270:mRNA-p1	Tb927.11.6270	inositol-1,4,5-trisphosphate (IP3) 5-phosphatase, putative	Signalling	0	0	0	0	2	2	2	1	2	2	2	0	0	0	0	2	0	0	0	0	0	2	0	0	0	0	0	2	0	4.1	4.1	4.1	62.121	564	564	0.0012658	1.9239	0	0	0	0	4.1	0	30900000
	Tb927.10.7110:mRNA-p1	Tb927.10.7110:mRNA-p1	Tb927.10.7110	Inositol-3-phosphate synthase	Signalling	0	0	0	0	2	2	2	1	2	2	2	0	0	0	0	2	1	0	0	0	0	2	1	0	0	0	0	2	1	6.2	6.2	6.2	58.274	528	528	0	9.6731	0	0	0	0	6.2	2.5	114000000
	Tb927.3.1840:mRNA-p1	Tb927.3.1840:mRNA-p1	Tb927.3.1840	3-oxo-5-alpha-steroid 4-dehydrogenase, putative	Sterols	0	0	0	0	7	7	7	1	7	7	7	0	0	0	0	6	1	0	0	0	0	6	1	0	0	0	0	6	1	15.1	15.1	15.1	33.355	298	298	0	36.233	0	0	0	0	15.1	3	388000000
	Tb927.7.5230:mRNA-p1	Tb927.7.5230:mRNA-p1	Tb927.7.5230	lanosterol synthase	Sterols	0	0	0	0	1	1	1	1	1	1	1	0	0	0	1	0	0	0	0	0	1	0	0	0	0	0	1	0	0	0.9	0.9	0.9	103.03	906	906	0.0056689	1.2911	0	0	0	0.9	0	0	0
+	Tb927.10.4570:mRNA-p1;Tb927.10.4560:mRNA-p1	Tb927.10.4570:mRNA-p1;Tb927.10.4560:mRNA-p1	Tb927.10.4570	EF2 elongation factor 2	Translation	0	5	1	1	43;43	43;43	43;43	2	43	43	43	1	0	5	10	31	31	1	0	5	10	31	31	1	0	5	10	31	31	61.9	61.9	61.9	94.333	846	846;846	0	323.31	1.2	0	6.6	14.1	46	43.1	8740000000
+	Tb927.9.12510:mRNA-p1	Tb927.9.12510:mRNA-p1	Tb927.9.12510	DED1-2, ATP-dependent DEAD/H RNA helicase, DED1-2	Translation	0	4	1	1	37	37	36	1	37	37	36	4	1	0	15	24	24	4	1	0	15	24	24	4	1	0	15	23	24	50.2	50.2	49	82.74	735	735	0	172.98	7.2	2.3	0	27.8	33.3	34.6	3230000000
+	Tb927.7.6090:mRNA-p1	Tb927.7.6090:mRNA-p1	Tb927.7.6090	eIF3a	Translation	0	0	1	1	21	21	21	1	21	21	21	0	0	0	3	15	9	0	0	0	3	15	9	0	0	0	3	15	9	28.5	28.5	28.5	88.162	762	762	0	125.82	0	0	0	4.9	23.2	13	775000000
	Tb927.11.13190:mRNA-p1;Tb927.11.13090:mRNA-p1	Tb927.11.13190:mRNA-p1;Tb927.11.13090:mRNA-p1	Tb927.11.13190	EF1 gamma, elongation factor 1 gamma, putative	Translation	0	2	1	1	21;20	21;20	21;20	2	21	21	21	1	1	2	2	14	14	1	1	2	2	14	14	1	1	2	2	14	14	56.9	56.9	56.9	46.275	404	404;404	0	155.52	3.5	3.5	4.5	8.4	45.3	36.6	3730000000
	Tb927.10.14550:mRNA-p1	Tb927.10.14550:mRNA-p1	Tb927.10.14550	DED1-1, ATP-dependent DEAD/H RNA helicase, VASA homologue; strongest yeast match is to DBP1	Translation	0	8	1	1	19	18	18	1	19	18	18	8	2	1	8	11	10	8	2	1	8	10	10	8	2	1	8	10	10	35.3	35.3	35.3	66.588	618	618	0	189.47	20.2	3.2	2.1	17.6	22.2	18.9	1530000000
+	Tb927.11.6160:mRNA-p1	Tb927.11.6160:mRNA-p1	Tb927.11.6160	ERF3 eukaryotic release factor 3, putative	Translation	0	0	1	1	18	18	18	1	18	18	18	0	0	0	2	10	12	0	0	0	2	10	12	0	0	0	2	10	12	25.1	25.1	25.1	76.914	698	698	0	76.162	0	0	0	3.6	15.5	17.5	959000000
+	Tb927.8.4500:mRNA-p1;Tb11.v5.0763.1-p1	Tb927.8.4500:mRNA-p1;Tb11.v5.0763.1-p1	Tb927.8.4500	eIF4G5	Translation	0	0	1	1	15;12	15;12	15;12	2	15	15	15	0	0	0	4	12	3	0	0	0	4	12	3	0	0	0	4	12	3	24.8	24.8	24.8	84.574	749	749;565	0	91.431	0	0	0	9.5	17.6	5.9	750000000
	Tb927.11.11370:mRNA-p1;Tb927.11.11360:mRNA-p1	Tb927.11.11370:mRNA-p1;Tb927.11.11360:mRNA-p1	Tb927.11.11370	guanine nucleotide-binding protein beta subunit- like protein (TRACK)	Translation	0	8	1	1	15;15	15;15	15;15	2	15	15	15	1	8	1	2	10	8	1	8	1	2	10	8	1	8	1	2	10	8	63.5	63.5	63.5	34.69	318	318;318	0	217.73	3.8	34.3	3.8	10.1	55.7	35.8	3220000000
+	Tb927.9.4680:mRNA-p1	Tb927.9.4680:mRNA-p1	Tb927.9.4680	eIF4A1	Translation	0	1	1	1	14	14	14	1	14	14	14	0	1	1	4	12	9	0	1	1	4	12	9	0	1	1	4	12	9	45.3	45.3	45.3	45.361	404	404	0	103.23	0	2.5	1.7	10.1	38.9	26.2	3890000000
+	Tb927.11.10560:mRNA-p1	Tb927.11.10560:mRNA-p1	Tb927.11.10560	eIF4G4	Translation	0	0	1	1	11	11	11	1	11	11	11	0	0	0	3	10	2	0	0	0	3	10	2	0	0	0	3	10	2	15.2	15.2	15.2	79.7	697	697	0	36.786	0	0	0	5.9	14.1	2.3	463000000
	Tb927.5.2570:mRNA-p1	Tb927.5.2570:mRNA-p1	Tb927.5.2570	EIF3B translation initiation factor	Translation	0	1	0	1	22	22	22	1	22	22	22	1	0	1	1	18	7	1	0	1	1	18	7	1	0	1	1	18	7	34.9	34.9	34.9	79.81	696	696	0	107.05	1.4	0	1	1.4	28.9	9.9	2080000000
	Tb927.11.14590:mRNA-p1;REV__Tb08.27P2.370:pseudogenic_transcript-p1	Tb927.11.14590:mRNA-p1	Tb927.11.14590	G5-IP eIF4G5 interacting protein	Translation	0	0	0	0	10;1	10;1	10;1	2	10	10	10	0	0	0	0	6	7	0	0	0	0	6	7	0	0	0	0	6	7	20.7	20.7	20.7	70.339	629	629;482	0	34.581	0	0	0	0	9.1	16.9	510000000
	Tb927.6.4370:mRNA-p1	Tb927.6.4370:mRNA-p1	Tb927.6.4370	eIF3d	Translation	0	2	0	0	10	10	10	1	10	10	10	0	2	0	0	8	5	0	2	0	0	8	5	0	2	0	0	8	5	26.3	26.3	26.3	57.974	506	506	0	63.082	0	4	0	0	21.5	10.7	1070000000
	Tb927.10.4640:mRNA-p1	Tb927.10.4640:mRNA-p1	Tb927.10.4640	eIF3L	Translation	0	0	0	0	9	9	9	1	9	9	9	0	0	0	0	7	3	0	0	0	0	7	3	0	0	0	0	7	3	28.1	28.1	28.1	55.649	488	488	0	95.071	0	0	0	0	23.6	8	500000000
	Tb927.7.1670:mRNA-p1	Tb927.7.1670:mRNA-p1	Tb927.7.1670	eIF4E6	Translation	0	0	0	1	8	8	8	1	8	8	8	0	0	0	1	5	5	0	0	0	1	5	5	0	0	0	1	5	5	58.1	58.1	58.1	20.864	186	186	0	42.234	0	0	0	7	39.8	33.3	663000000
	Tb927.10.8270:mRNA-p1;Tb927.10.8290:mRNA-p1;Tb11.v5.0877.1-p1	Tb927.10.8270:mRNA-p1;Tb927.10.8290:mRNA-p1;Tb11.v5.0877.1-p1	Tb927.10.8270	eIF3c	Translation	0	0	0	1	7;7;5	7;7;5	7;7;5	3	7	7	7	0	0	0	3	4	1	0	0	0	3	4	1	0	0	0	3	4	1	10.4	10.4	10.4	84.339	740	740;740;490	0	19.385	0	0	0	4.9	5.5	1.6	160000000
	Tb927.3.1680:mRNA-p1	Tb927.3.1680:mRNA-p1	Tb927.3.1680	eIF3F	Translation	0	0	0	0	7	7	7	1	7	7	7	0	0	0	0	4	4	0	0	0	0	4	4	0	0	0	0	4	4	19.2	19.2	19.2	37.252	338	338	0	11.925	0	0	0	0	12.4	13.6	259000000
	Tb927.11.13250:mRNA-p1	Tb927.11.13250:mRNA-p1	Tb927.11.13250	eIF-2-gamma	Translation	0	1	0	0	7	7	7	1	7	7	7	0	1	0	0	6	1	0	1	0	0	6	1	0	1	0	0	6	1	20.8	20.8	20.8	52.2	477	477	0	39.226	0	2.9	0	0	17.8	2.9	584000000
	Tb927.5.3450:mRNA-p1	Tb927.5.3450:mRNA-p1	Tb927.5.3450	eukaryotic translation initiation factor eIF2A, putative	Translation	0	0	0	1	6	6	6	1	6	6	6	0	0	0	1	6	3	0	0	0	1	6	3	0	0	0	1	6	3	15	15	15	57.992	527	527	0	122.3	0	0	0	2.5	15	7.2	861000000
	Tb927.10.13280:mRNA-p1	Tb927.10.13280:mRNA-p1	Tb927.10.13280	GCN1 homologue, possibly involved in translation control	Translation	0	0	0	0	6	6	6	1	6	6	6	0	0	0	1	5	0	0	0	0	1	5	0	0	0	0	1	5	0	2.9	2.9	2.9	286.2	2606	2606	0	22.177	0	0	0	0.7	2.2	0	115000000
	Tb927.9.9290:mRNA-p1	Tb927.9.9290:mRNA-p1	Tb927.9.9290	PABP1	Translation	0	0	0	0	6	6	6	1	6	6	6	0	0	0	0	6	0	0	0	0	0	6	0	0	0	0	0	6	0	15.9	15.9	15.9	63.029	566	566	0	72.609	0	0	0	0	15.9	0	183000000
	Tb927.4.1930:mRNA-p1	Tb927.4.1930:mRNA-p1	Tb927.4.1930	EIF3G	Translation	0	4	0	0	6	6	6	1	6	6	6	1	4	0	0	1	2	1	4	0	0	1	2	1	4	0	0	1	2	24.3	24.3	24.3	31.293	272	272	0	19.288	5.9	18.8	0	0	4.4	4	336000000
	Tb927.3.2900:mRNA-p1	Tb927.3.2900:mRNA-p1	Tb927.3.2900	EF-2 alpha, elongation initiation factor 2 alpha subunit,	Translation	0	0	0	0	5	5	5	1	5	5	5	0	0	0	0	2	4	0	0	0	0	2	4	0	0	0	0	2	4	13.9	13.9	13.9	46.824	418	418	0	10.684	0	0	0	0	6	9.6	308000000
	Tb927.10.6800:mRNA-p1	Tb927.10.6800:mRNA-p1	Tb927.10.6800	RBG1, associated with translating ribosomes	Translation	0	0	0	0	4	4	4	1	4	4	4	0	0	0	0	2	2	0	0	0	0	2	2	0	0	0	0	2	2	9.5	9.5	9.5	41.267	368	368	0	5.2909	0	0	0	0	5.2	4.3	62500000
	Tb927.4.2740:mRNA-p1	Tb927.4.2740:mRNA-p1	Tb927.4.2740	EF hand protein, conserved, RNAi inc diff?	Translation	0	0	0	0	3	3	3	1	3	3	3	0	0	0	0	1	2	0	0	0	0	1	2	0	0	0	0	1	2	18	18	18	16.327	150	150	0.00246	1.7722	0	0	0	0	8	10.7	52400000
	Tb927.8.5880:mRNA-p1	Tb927.8.5880:mRNA-p1	Tb927.8.5880	eIF1A	Translation	0	0	0	0	3	3	3	1	3	3	3	0	0	0	0	2	3	0	0	0	0	2	3	0	0	0	0	2	3	21.5	21.5	21.5	19.445	172	172	0	8.3944	0	0	0	0	17.4	21.5	363000000
	Tb927.8.1170:mRNA-p1;Tb927.8.1190:mRNA-p1;Tb11.v5.0871.1-p1	Tb927.8.1170:mRNA-p1;Tb927.8.1190:mRNA-p1;Tb11.v5.0871.1-p1	Tb927.8.1170	eIF3H	Translation	0	0	0	0	2;2;1	2;2;1	2;2;1	3	2	2	2	0	0	0	0	1	1	0	0	0	0	1	1	0	0	0	0	1	1	7.9	7.9	7.9	36.419	331	331;331;310	0	3.9453	0	0	0	0	4.2	3.6	37100000
	Tb927.10.16070:mRNA-p1	Tb927.10.16070:mRNA-p1	Tb927.10.16070	eIF4E2	Translation	0	0	0	0	2	2	2	1	2	2	2	0	0	0	0	2	1	0	0	0	0	2	1	0	0	0	0	2	1	9.6	9.6	9.6	28.299	251	251	0	6.8093	0	0	0	0	9.6	3.2	57500000
	Tb927.11.2250:mRNA-p1	Tb927.11.2250:mRNA-p1	Tb927.11.2250	hypothetical protein, conserved, kineto-specific, pulled down by EIF4E2	Translation	0	0	0	0	2	2	2	1	2	2	2	0	0	0	0	1	1	0	0	0	0	1	1	0	0	0	0	1	1	10	10	10	26.94	241	241	0	2.6956	0	0	0	0	6.2	3.7	48900000
	Tb927.11.7100:mRNA-p1	Tb927.11.7100:mRNA-p1	Tb927.11.7100	MCT1/TMA20 homologue, similar to N-terminus of eIF2D	Translation	0	0	0	0	2	2	2	1	2	2	2	0	0	0	0	2	2	0	0	0	0	2	2	0	0	0	0	2	2	8.9	8.9	8.9	22.711	203	203	0	3.2518	0	0	0	0	8.9	8.9	109000000
	Tb927.10.1630:mRNA-p1	Tb927.10.1630:mRNA-p1	Tb927.10.1630	RLI translation termination & ribosome recycling	Translation	0	0	0	0	2	2	2	1	2	2	2	0	0	0	0	2	0	0	0	0	0	2	0	0	0	0	0	2	0	3.2	3.2	3.2	71.078	631	631	0	3.9295	0	0	0	0	3.2	0	90400000
	Tb927.9.11050:mRNA-p1	Tb927.9.11050:mRNA-p1	Tb927.9.11050	4E-IP, 4EIP, 4E-interacting protein, putative	Translation	0	1	0	1	2	2	2	1	2	2	2	1	0	0	1	2	1	1	0	0	1	2	1	1	0	0	1	2	1	4.8	4.8	4.8	58.54	545	545	0	21.253	2.9	0	0	2.9	4.8	2.9	92200000
	Tb927.6.2710:mRNA-p1	Tb927.6.2710:mRNA-p1	Tb927.6.2710	Possible HEL2 homologue, implicated in NGD and ribosome-associated quality control. N-terminus has four C2H2 fingers and ring finger, matches E3 ligases. C-terminus has poly(Gln) repeats	Translation	0	1	0	0	2	2	2	1	2	2	2	1	0	0	0	0	1	1	0	0	0	0	1	1	0	0	0	0	1	5.1	5.1	5.1	85.616	761	761	0	4.6796	3.9	0	0	0	0	1.2	1560000
	Tb927.5.3120:mRNA-p1	Tb927.5.3120:mRNA-p1	Tb927.5.3120	eIF2 beta	Translation	0	0	0	0	1	1	1	1	1	1	1	0	0	0	0	1	1	0	0	0	0	1	1	0	0	0	0	1	1	2.2	2.2	2.2	34.967	313	313	0.0012642	1.9238	0	0	0	0	2.2	2.2	78600000
	Tb927.11.9610:mRNA-p1	Tb927.11.9610:mRNA-p1	Tb927.11.9610	eIF3I	Translation	0	0	0	0	1	1	1	1	1	1	1	0	0	0	0	0	1	0	0	0	0	0	1	0	0	0	0	0	1	6.4	6.4	6.4	37.736	342	342	0	138.2	0	0	0	0	0	6.4	43200000
	Tb927.10.2770:mRNA-p1;Tb11.v5.0684.1-p1	Tb927.10.2770:mRNA-p1;Tb11.v5.0684.1-p1	Tb927.10.2770	eIF5	Translation	0	0	0	0	1;1	1;1	1;1	2	1	1	1	0	0	0	0	0	1	0	0	0	0	0	1	0	0	0	0	0	1	2.4	2.4	2.4	42.945	382	382;382	0.0057471	1.4041	0	0	0	0	0	2.4	18200000
	Tb927.11.740:mRNA-p1	Tb927.11.740:mRNA-p1	Tb927.11.740	eIF5A	Translation	0	0	0	0	1	1	1	1	1	1	1	0	0	0	0	0	1	0	0	0	0	0	1	0	0	0	0	0	1	9.6	9.6	9.6	17.82	166	166	0.0012887	2.0068	0	0	0	0	0	9.6	5300000
	Tb927.11.2300:mRNA-p1	Tb927.11.2300:mRNA-p1	Tb927.11.2300	ERF1 eukaryotic peptide chain release factor subunit 1, putative	Translation	0	0	0	0	1	1	1	1	1	1	1	0	0	0	0	1	1	0	0	0	0	1	1	0	0	0	0	1	1	2.2	2.2	2.2	50.976	452	452	0.0035714	1.6189	0	0	0	0	2.2	2.2	38900000
	Tb927.9.10710:mRNA-p1	Tb927.9.10710:mRNA-p1	Tb927.9.10710	ERF3-related protein (but not ERF3)	Translation	0	0	0	0	1	1	1	1	1	1	1	0	0	0	0	0	1	0	0	0	0	0	1	0	0	0	0	0	1	1.6	1.6	1.6	68.01	618	618	0	2.3492	0	0	0	0	0	1.6	9200000
	Tb927.6.3870:mRNA-p1	Tb927.6.3870:mRNA-p1	Tb927.6.3870	SGN1	Translation	0	0	0	0	1	1	1	1	1	1	1	0	0	0	0	0	1	0	0	0	0	0	1	0	0	0	0	0	1	6.1	6.1	6.1	22.904	214	214	0	3.092	0	0	0	0	0	6.1	8340000
	Tb927.6.4480:mRNA-p1	Tb927.6.4480:mRNA-p1	Tb927.6.4480	valyl-tRNA synthetase, putative (ValRS)	Translation.tRNA	0	0	0	0	13	13	13	1	13	13	13	0	0	0	0	9	8	0	0	0	0	9	8	0	0	0	0	9	8	16.8	16.8	16.8	110.92	975	975	0	46.59	0	0	0	0	13.2	8.3	783000000
	Tb927.4.2310:mRNA-p1	Tb927.4.2310:mRNA-p1	Tb927.4.2310	asparaginyl-tRNA synthetase, putative	Translation.tRNA	0	0	0	0	9	9	9	1	9	9	9	0	0	0	0	6	4	0	0	0	0	6	4	0	0	0	0	6	4	14.5	14.5	14.5	75.462	667	667	0	16.172	0	0	0	0	9.9	5.7	296000000
	Tb927.8.1600.1:mRNA-p1;Tb927.8.1600.2:mRNA-p1	Tb927.8.1600.1:mRNA-p1;Tb927.8.1600.2:mRNA-p1	Tb927.8.1600	lysyl-tRNA synthetase, putative	Translation.tRNA	0	0	0	0	9;8	9;8	9;8	2	9	9	9	0	0	0	0	5	5	0	0	0	0	5	5	0	0	0	0	5	5	15.6	15.6	15.6	66.786	584	584;660	0	12.695	0	0	0	0	7.4	9.6	174000000
	Tb927.9.5210:mRNA-p1	Tb927.9.5210:mRNA-p1	Tb927.9.5210	glutaminyl-tRNA synthetase, putative (28G16.175)	Translation.tRNA	0	0	0	0	8	8	8	1	8	8	8	0	0	0	0	7	3	0	0	0	0	7	3	0	0	0	0	7	3	16.1	16.1	16.1	67.278	577	577	0	12.191	0	0	0	0	13	6.4	495000000
	Tb927.11.3730:mRNA-p1	Tb927.11.3730:mRNA-p1	Tb927.11.3730	leucyl-tRNA synthetase, putative (LeuRS)	Translation.tRNA	0	0	0	0	5	5	5	1	5	5	5	0	0	0	0	2	3	0	0	0	0	2	3	0	0	0	0	2	3	4.5	4.5	4.5	121.82	1074	1074	0	16.46	0	0	0	0	1.9	3.3	86700000
	Tb927.5.1090:mRNA-p1	Tb927.5.1090:mRNA-p1	Tb927.5.1090	threonyl-tRNA synthetase, putative	Translation.tRNA	0	0	0	0	5	5	5	1	5	5	5	0	0	0	0	3	2	0	0	0	0	3	2	0	0	0	0	3	2	6	6	6	90.983	799	799	0	9.443	0	0	0	0	3.3	2.8	48400000
	Tb927.11.7170:mRNA-p1	Tb927.11.7170:mRNA-p1	Tb927.11.7170	seryl-tRNA synthetase, putative	Translation.tRNA	0	0	0	0	4	4	4	1	4	4	4	0	0	0	0	2	2	0	0	0	0	2	2	0	0	0	0	2	2	9.6	9.6	9.6	53.857	479	479	0	7.9251	0	0	0	0	3.1	6.5	41700000
	Tb927.10.12890:mRNA-p1	Tb927.10.12890:mRNA-p1	Tb927.10.12890	bifunctional aminoacyl-tRNA synthetase, putative	Translation.tRNA	0	0	0	0	2	2	2	1	2	2	2	0	0	0	0	1	1	0	0	0	0	1	1	0	0	0	0	1	1	2.7	2.7	2.7	80.555	715	715	0	4.9913	0	0	0	0	1.3	1.4	16000000
	Tb927.10.1500:mRNA-p1	Tb927.10.1500:mRNA-p1	Tb927.10.1500	methionyl-tRNA synthetase, putative (MetRS)	Translation.tRNA	0	0	0	0	2	2	2	1	2	2	2	0	0	0	0	2	0	0	0	0	0	2	0	0	0	0	0	2	0	3.8	3.8	3.8	86.91	773	773	0	9.8985	0	0	0	0	3.8	0	49600000
+	Tb927.3.4070:mRNA-p1;Tb927.3.4080:mRNA-p1;Tb927.3.4100:mRNA-p1;Tb927.3.4090:mRNA-p1;Tb927.3.4110:mRNA-p1	Tb927.3.4070:mRNA-p1;Tb927.3.4080:mRNA-p1;Tb927.3.4100:mRNA-p1;Tb927.3.4090:mRNA-p1;Tb927.3.4110:mRNA-p1	Tb927.3.4070	pyruvate transporter PT1	Transporter	0	1	1	1	11;9;9;9;6	11;9;9;9;6	11;9;9;9;6	5	11	11	11	1	0	0	2	9	7	1	0	0	2	9	7	1	0	0	2	9	7	13.9	13.9	13.9	65.502	595	595;583;585;595;595	0	79.223	1.5	0	0	3	12.6	9.9	3220000000
	Tb927.10.14160:mRNA-p1	Tb927.10.14160:mRNA-p1	Tb927.10.14160	Aquaglyceroporin 3	Transporter	0	0	0	0	3	3	3	1	3	3	3	0	0	0	0	3	0	0	0	0	0	3	0	0	0	0	0	3	0	13.8	13.8	13.8	32.751	304	304	0	28.235	0	0	0	0	13.8	0	392000000
	Tb927.11.10780:mRNA-p1	Tb927.11.10780:mRNA-p1	Tb927.11.10780	Voltage-dependent anion channel (VDAC), putative	Transporter	0	0	0	0	2	2	2	1	2	2	2	0	0	0	0	1	1	0	0	0	0	1	1	0	0	0	0	1	1	7.2	7.2	7.2	30.902	279	279	0	2.6112	0	0	0	0	4.3	2.9	18100000
	Tb927.4.4490:mRNA-p1	Tb927.4.4490:mRNA-p1	Tb927.4.4490	multidrug resistance protein E,p-glycoprotein (MRPE)	Transporter	0	0	0	0	1	1	1	1	1	1	1	0	0	0	1	0	0	0	0	0	1	0	0	0	0	0	1	0	0	0.7	0.7	0.7	193.8	1759	1759	0.0024722	1.7867	0	0	0	0.7	0	0	870000
	Tb927.3.800:mRNA-p1	Tb927.3.800:mRNA-p1	Tb927.3.800	Vacuolar iron transporter VIT1	Transporter	0	0	0	0	1	1	1	1	1	1	1	0	0	0	0	1	0	0	0	0	0	1	0	0	0	0	0	1	0	10	10	10	30.573	281	281	0	7.4809	0	0	0	0	10	0	11900000
+	Tb927.1.4650:mRNA-p1;Tb927.1.4600:mRNA-p1;Tb927.1.4560:mRNA-p1;Tb927.1.4630:mRNA-p1;Tb927.1.4580:mRNA-p1;Tb927.1.4540:mRNA-p1;Tb11.v5.0705.1-p1	Tb927.1.4650:mRNA-p1	Tb927.1.4650	cyclin-like F-box protein (CFB2)	Ubiquitin.proteasome	0	0	1	1	18;3;3;2;2;2;2	18;3;3;2;2;2;2	18;3;3;2;2;2;2	7	18	18	18	0	0	0	6	15	12	0	0	0	6	15	12	0	0	0	6	15	12	43.9	43.9	43.9	52.284	476	476;527;527;527;527;527;527	0	104.81	0	0	0	17.9	42.2	25.8	6730000000
+	Tb927.9.12650:mRNA-p1;Tb11.v5.0675.1-p1	Tb927.9.12650:mRNA-p1	Tb927.9.12650	ubiquitin-activating enzyme e1, putative (UBA2)	Ubiquitin.proteasome	0	0	1	1	18;7	18;7	18;7	2	18	18	18	0	0	0	4	11	9	0	0	0	4	11	9	0	0	0	4	11	9	17	17	17	134.65	1214	1214;331	0	69.609	0	0	0	4.2	11	8.2	1170000000
	Tb927.8.2640:mRNA-p1	Tb927.8.2640:mRNA-p1	Tb927.8.2640	ubiquitin-activating enzyme e1, putative (UBA1)	Ubiquitin.proteasome	0	1	0	0	8	8	8	1	8	8	8	1	0	1	0	5	5	1	0	1	0	5	5	1	0	1	0	5	5	9.3	9.3	9.3	116.41	1055	1055	0	89.662	1.3	0	1.9	0	5.9	6.6	478000000
	Tb927.11.7020:mRNA-p1	Tb927.11.7020:mRNA-p1	Tb927.11.7020	proteasome alpha 7 subunit, putative (PSA4)	Ubiquitin.proteasome	0	0	0	0	7	7	7	1	7	7	7	0	0	0	0	6	4	0	0	0	0	6	4	0	0	0	0	6	4	37.7	37.7	37.7	27.865	247	247	0	44.4	0	0	0	0	34.8	21.1	334000000
	Tb927.7.2500:mRNA-p1	Tb927.7.2500:mRNA-p1	Tb927.7.2500	proteasome regulatory ATPase subunit 1 (RPT1)	Ubiquitin.proteasome	0	0	0	0	6	6	6	1	6	6	6	0	0	0	0	2	5	0	0	0	0	2	5	0	0	0	0	2	5	16	16	16	48.475	437	437	0	18.693	0	0	0	0	7.3	11.4	195000000
	Tb927.3.5520:mRNA-p1	Tb927.3.5520:mRNA-p1	Tb927.3.5520	proteasome regulatory non-ATPase subunit 1 (RPN1)	Ubiquitin.proteasome	0	0	0	0	6	6	6	1	6	6	6	0	0	0	1	6	0	0	0	0	1	6	0	0	0	0	1	6	0	8.6	8.6	8.6	99.897	911	911	0	87.069	0	0	0	2.3	8.6	0	247000000
	Tb927.10.1550:mRNA-p1	Tb927.10.1550:mRNA-p1	Tb927.10.1550	proteasome regulatory non-ATP-ase subunit 5 (RPN5)	Ubiquitin.proteasome	0	0	0	0	5	5	5	1	5	5	5	0	0	0	0	4	1	0	0	0	0	4	1	0	0	0	0	4	1	11.6	11.6	11.6	54.896	482	482	0	19.024	0	0	0	0	9.1	2.5	75600000
	Tb927.3.4840:mRNA-p1	Tb927.3.4840:mRNA-p1	Tb927.3.4840	ubiquitin hydrolase, putative,cysteine peptidase, Clan CA, family C19, putative	Ubiquitin.proteasome	0	0	0	0	5	5	5	1	5	5	5	0	0	0	0	3	3	0	0	0	0	3	3	0	0	0	0	3	3	9.8	9.8	9.8	81.752	731	731	0	23.435	0	0	0	0	5.6	5.7	210000000
	Tb927.11.14330:mRNA-p1	Tb927.11.14330:mRNA-p1	Tb927.11.14330	hypothetical protein, conserved, ARM repeat, Zn binding, HECT E3 ligase	Ubiquitin.proteasome	0	0	0	0	4	4	4	1	4	4	4	0	0	0	1	3	0	0	0	0	1	3	0	0	0	0	1	3	0	3.5	3.5	3.5	176.83	1609	1609	0	7.3216	0	0	0	1	2.5	0	59700000
	Tb927.10.6080:mRNA-p1;Tb11.v5.0200.1-p1	Tb927.10.6080:mRNA-p1;Tb11.v5.0200.1-p1	Tb927.10.6080	proteasome beta 5 subunit, putative,proteasome beta 5 subunit (PRCE)	Ubiquitin.proteasome	0	0	0	0	4;4	4;4	4;4	2	4	4	4	0	0	0	0	1	4	0	0	0	0	1	4	0	0	0	0	1	4	12.6	12.6	12.6	34.416	310	310;310	0	7.9396	0	0	0	0	3.2	12.6	99600000
	Tb927.6.1260:mRNA-p1;Tb11.v5.0742.1-p1	Tb927.6.1260:mRNA-p1;Tb11.v5.0742.1-p1	Tb927.6.1260	proteasome beta-1 subunit, putative (TbPSB1)	Ubiquitin.proteasome	0	0	0	0	3;3	3;3	3;3	2	3	3	3	0	0	0	0	2	1	0	0	0	0	2	1	0	0	0	0	2	1	9.6	9.6	9.6	30.441	282	282;282	0	3.8484	0	0	0	0	6.4	3.2	135000000
	Tb927.11.16030:mRNA-p1	Tb927.11.16030:mRNA-p1	Tb927.11.16030	proteasome regulatory non-ATP-ase subunit 7 (RPN7)	Ubiquitin.proteasome	0	0	0	0	3	3	3	1	3	3	3	0	0	0	0	1	3	0	0	0	0	1	3	0	0	0	0	1	3	7.8	7.8	7.8	45.549	399	399	0	5.8489	0	0	0	0	3	7.8	58500000
	Tb927.11.14430:mRNA-p1	Tb927.11.14430:mRNA-p1	Tb927.11.14430	proteasome regulatory non-ATP-ase subunit 1 (RPN1)	Ubiquitin.proteasome	0	1	0	0	3	3	3	1	3	3	3	0	0	1	0	1	2	0	0	1	0	1	2	0	0	1	0	1	2	9.5	9.5	9.5	31.281	274	274	0	5.1629	0	0	4.4	0	2.6	6.9	56900000
	Tb927.11.3390:mRNA-p1	Tb927.11.3390:mRNA-p1	Tb927.11.3390	hypothetical protein, conserved, HECT E3 ligase at C-terminus	Ubiquitin.proteasome	0	0	0	0	2	2	2	1	2	2	2	0	0	0	0	2	1	0	0	0	0	2	1	0	0	0	0	2	1	0.5	0.5	0.5	486.55	4460	4460	0.0035757	1.6282	0	0	0	0	0.5	0.2	12900000000
	Tb927.8.6330:mRNA-p1	Tb927.8.6330:mRNA-p1	Tb927.8.6330	hypothetical protein, conserved, similar to yeast Doa1p, 7WD repeats,PFU domain binding to Ubiquitin	Ubiquitin.proteasome	0	0	0	0	2	2	2	1	2	2	2	0	0	0	0	2	1	0	0	0	0	2	1	0	0	0	0	2	1	2.5	2.5	2.5	94.632	886	886	0	4.0225	0	0	0	0	2.5	0.8	43400000
	Tb927.10.3710:mRNA-p1;Tb11.v5.0761.1-p1	Tb927.10.3710:mRNA-p1;Tb11.v5.0761.1-p1	Tb927.10.3710	proteasome activator protein PA26	Ubiquitin.proteasome	0	0	0	0	2;2	2;2	2;2	2	2	2	2	0	0	0	0	1	1	0	0	0	0	1	1	0	0	0	0	1	1	10.4	10.4	10.4	25.258	231	231;231	0	5.5982	0	0	0	0	6.9	3.5	36700000
	Tb927.9.9670:mRNA-p1	Tb927.9.9670:mRNA-p1	Tb927.9.9670	proteasome alpha 6 subunit (putative) (TbPSA6)	Ubiquitin.proteasome	0	0	0	0	2	2	2	1	2	2	2	0	0	0	0	1	1	0	0	0	0	1	1	0	0	0	0	1	1	7.2	7.2	7.2	27.543	250	250	0.0013089	2.0559	0	0	0	0	4	3.2	66500000
	Tb927.9.11330:mRNA-p1	Tb927.9.11330:mRNA-p1	Tb927.9.11330	proteasome beta 2 subunit, putative	Ubiquitin.proteasome	0	0	0	0	2	2	2	1	2	2	2	0	0	0	0	0	2	0	0	0	0	0	2	0	0	0	0	0	2	7.8	7.8	7.8	27.402	255	255	0.0056754	1.3206	0	0	0	0	0	7.8	24800000
	Tb927.10.4710:mRNA-p1	Tb927.10.4710:mRNA-p1	Tb927.10.4710	proteasome beta 2 subunit, putative,20S proteasome subunit (PSB4)	Ubiquitin.proteasome	0	0	0	0	2	2	2	1	2	2	2	0	0	0	0	1	1	0	0	0	0	1	1	0	0	0	0	1	1	7.8	7.8	7.8	22.776	206	206	0.001292	2.0113	0	0	0	0	3.9	3.9	39000000
	Tb927.8.1590:mRNA-p1	Tb927.8.1590:mRNA-p1	Tb927.8.1590	TOM1, HECT ubiquitin-protein ligase involved in mRNA export from nucleus	Ubiquitin.proteasome	0	0	0	0	2	2	2	1	2	2	2	0	0	0	0	2	0	0	0	0	0	2	0	0	0	0	0	2	0	0.5	0.5	0.5	470.71	4304	4304	0	3.1882	0	0	0	0	0.5	0	28500000
	Tb927.6.2690:mRNA-p1	Tb927.6.2690:mRNA-p1	Tb927.6.2690	ubiquitin carboxyl-terminal hydrolase, Clan CA cysteine peptidase, family C12, putative	Ubiquitin.proteasome	0	0	0	0	2	2	2	1	2	2	2	0	0	0	0	1	1	0	0	0	0	1	1	0	0	0	0	1	1	4.4	4.4	4.4	70.409	639	639	0	5.9142	0	0	0	0	1.7	2.7	34000000
	Tb927.9.14470:mRNA-p1	Tb927.9.14470:mRNA-p1	Tb927.9.14470	ubiquitin carboxyl-terminal hydrolase, Clan CA cysteine peptidase, family C12, putative	Ubiquitin.proteasome	0	0	0	0	2	2	2	1	2	2	2	0	0	0	0	2	0	0	0	0	0	2	0	0	0	0	0	2	0	1.6	1.6	1.6	132.38	1161	1161	0.0057604	1.4129	0	0	0	0	1.6	0	20000000
	Tb927.10.5770:mRNA-p1	Tb927.10.5770:mRNA-p1	Tb927.10.5770	CDC48 homologue, implicated in ERAD and ribosome quality control	Ubiquitin.proteasome	0	0	0	0	1	1	1	1	1	1	1	0	0	0	0	0	1	0	0	0	0	0	1	0	0	0	0	0	1	1	1	1	85.825	780	780	1	-2	0	0	0	0	0	1	29500000
	Tb927.6.5110:mRNA-p1	Tb927.6.5110:mRNA-p1	Tb927.6.5110	DDB1	Ubiquitin.proteasome	0	0	0	0	1	1	1	1	1	1	1	0	0	0	0	0	1	0	0	0	0	0	1	0	0	0	0	0	1	0.8	0.8	0.8	138.21	1270	1270	0.0056883	1.3339	0	0	0	0	0	0.8	0
	Tb927.9.6040:mRNA-p1	Tb927.9.6040:mRNA-p1	Tb927.9.6040	E1-like ubiquitin-activating enzyme, putative	Ubiquitin.proteasome	0	0	0	0	1	1	1	1	1	1	1	0	0	0	0	0	1	0	0	0	0	0	1	0	0	0	0	0	1	2.8	2.8	2.8	42.021	387	387	1	-2	0	0	0	0	0	2.8	8990000
	Tb927.10.15720:mRNA-p1	Tb927.10.15720:mRNA-p1	Tb927.10.15720	Proteasome regulatory non-ATP-ase subunit 9 (RPN9)	Ubiquitin.proteasome	0	0	0	0	1	1	1	1	1	1	1	0	0	0	0	1	1	0	0	0	0	1	1	0	0	0	0	1	1	2.7	2.7	2.7	45.989	405	405	0.0024242	1.6892	0	0	0	0	2.7	2.7	11600000
+	Tb927.10.6050:mRNA-p1;Tb11.v5.0198.1-p1;Tb11.v5.0197.1-p1	Tb927.10.6050:mRNA-p1;Tb11.v5.0198.1-p1	Tb927.10.6050	clathrin heavy chain (CHC)	Vesicular.transport	0	3	1	1	70;38;32	70;38;32	70;38;32	3	70	70	70	3	2	1	25	60	33	3	2	1	25	60	33	3	2	1	25	60	33	49	49	49	190.62	1703	1703;835;850	0	323.31	2.5	2.1	0.5	20.4	43.2	25.2	8440000000
+	Tb927.10.14150:mRNA-p1;Tb11.v5.0606.1-p1	Tb927.10.14150:mRNA-p1	Tb927.10.14150	ERBP1	Vesicular.transport	0	10	1	1	54;11	54;11	54;11	2	54	54	54	0	10	2	21	48	34	0	10	2	21	48	34	0	10	2	21	48	34	69.7	69.7	69.7	55.311	479	479;362	0	323.31	0	21.3	5	35.7	68.9	52	45900000000
+	Tb927.8.1870:mRNA-p1	Tb927.8.1870:mRNA-p1	Tb927.8.1870	Golgi/lysosome glycoprotein 1 (tGLP1)	Vesicular.transport	0	0	1	1	18	18	18	1	18	18	18	0	0	0	2	18	9	0	0	0	2	18	9	0	0	0	2	18	9	33	33	33	67.597	616	616	0	110.91	0	0	0	4.9	33	19.5	1790000000
	Tb927.4.2070:mRNA-p1;Tb11.v5.0410.1-p1;Tb11.v5.0881.1-p1	Tb927.4.2070:mRNA-p1;Tb11.v5.0410.1-p1	Tb927.4.2070	Myosin-like protein, possibly ER-Golgi vesicular transport	Vesicular.transport	0	2	1	1	16;11;7	16;11;7	16;11;7	3	16	16	16	2	2	0	16	9	4	2	2	0	16	9	4	2	2	0	16	9	4	45.9	45.9	45.9	511.32	4455	4455;1729;615	0	200.44	19.6	18.2	0	45.9	40.2	32.8	1210000000
	Tb927.2.6050:mRNA-p1	Tb927.2.6050:mRNA-p1	Tb927.2.6050	coatamer beta-prime subunit beta prime COP	Vesicular.transport	0	0	0	0	11	11	11	1	11	11	11	0	0	0	0	5	8	0	0	0	0	5	8	0	0	0	0	5	8	14.9	14.9	14.9	94.485	855	855	0	29.912	0	0	0	0	8.3	10.4	333000000
	Tb927.8.890:mRNA-p1	Tb927.8.890:mRNA-p1	Tb927.8.890	Ras-related protein Rab1A	Vesicular.transport	0	1	0	0	10	10	9	1	10	10	9	0	0	1	0	8	7	0	0	1	0	8	7	0	0	1	0	7	6	48.1	48.1	42.8	22.714	208	208	0	68.165	0	0	4.3	0	44.7	38.9	1370000000
	Tb927.9.9550:mRNA-p1	Tb927.9.9550:mRNA-p1	Tb927.9.9550	ERBP2	Vesicular.transport	0	0	0	1	9	9	9	1	9	9	9	0	0	0	1	8	6	0	0	0	1	8	6	0	0	0	1	8	6	49.5	49.5	49.5	24.509	212	212	0	98.598	0	0	0	5.7	46.2	35.4	2290000000
	Tb927.11.6170:mRNA-p1	Tb927.11.6170:mRNA-p1	Tb927.11.6170	protein transport protein Sec31, putative,cytosolic coat protein, putative	Vesicular.transport	0	0	0	0	8	8	8	1	8	8	8	0	0	0	0	6	5	0	0	0	0	6	5	0	0	0	0	6	5	8	8	8	131.1	1231	1231	0	26.265	0	0	0	0	5.8	5.5	221000000
	Tb927.9.13740:mRNA-p1;Tb927.9.13710:mRNA-p1;Tb927.9.13680:mRNA-p1;Tb927.9.13655:mRNA-p1;Tb927.9.13650:mRNA-p1	Tb927.9.13740:mRNA-p1;Tb927.9.13710:mRNA-p1;Tb927.9.13680:mRNA-p1;Tb927.9.13655:mRNA-p1;Tb927.9.13650:mRNA-p1	Tb927.9.13740	ADP-ribosylation factor, putative	Vesicular.transport	0	0	0	0	7;7;7;7;7	7;7;7;7;7	7;7;7;7;7	5	7	7	7	0	0	0	0	6	4	0	0	0	0	6	4	0	0	0	0	6	4	47.3	47.3	47.3	20.624	182	182;182;182;182;182	0	28.163	0	0	0	0	39	24.2	988000000
	Tb927.4.450:mRNA-p1	Tb927.4.450:mRNA-p1	Tb927.4.450	coatomer alpha subunit, putative (TbCoatomerAlpha)	Vesicular.transport	0	0	0	0	7	7	7	1	7	7	7	0	0	0	0	5	3	0	0	0	0	5	3	0	0	0	0	5	3	7.3	7.3	7.3	132.85	1192	1192	0	22.278	0	0	0	0	5.6	2.6	261000000
	Tb927.7.3180:mRNA-p1	Tb927.7.3180:mRNA-p1	Tb927.7.3180	adaptin complex AP1 mu subunit	Vesicular.transport	0	0	0	0	6	6	6	1	6	6	6	0	0	0	0	6	2	0	0	0	0	6	2	0	0	0	0	6	2	18.5	18.5	18.5	49.235	432	432	0	13.123	0	0	0	0	18.5	4.4	330000000
	Tb927.1.2570:mRNA-p1	Tb927.1.2570:mRNA-p1	Tb927.1.2570	coatomer beta subunit (beta-coP)	Vesicular.transport	0	0	0	0	6	6	6	1	6	6	6	0	0	0	0	6	0	0	0	0	0	6	0	0	0	0	0	6	0	7	7	7	110.05	982	982	0	18.992	0	0	0	0	7	0	167000000
	Tb927.6.3500:mRNA-p1	Tb927.6.3500:mRNA-p1	Tb927.6.3500	RME8 endosomal trafficking protein, clathrin-associated	Vesicular.transport	0	0	0	0	6	6	6	1	6	6	6	0	0	0	2	5	0	0	0	0	2	5	0	0	0	0	2	5	0	3.4	3.4	3.4	253.87	2236	2236	0	34.662	0	0	0	1.3	2.6	0	82800000
	Tb927.6.4500:mRNA-p1	Tb927.6.4500:mRNA-p1	Tb927.6.4500	translocon-associated protein beta	Vesicular.transport	0	0	0	0	6	6	6	1	6	6	6	0	0	0	0	3	4	0	0	0	0	3	4	0	0	0	0	3	4	34	34	34	22.705	203	203	0	71.32	0	0	0	0	14.8	24.6	531000000
	Tb927.1.1560:mRNA-p1;Tb11.v5.0464.1-p1	Tb927.1.1560:mRNA-p1;Tb11.v5.0464.1-p1	Tb927.1.1560	vesicular-fusion protein nsf, putative,N-ethylmaleimide sensitive factor (NsF)	Vesicular.transport	0	0	0	0	6;6	6;6	6;6	2	6	6	6	0	0	0	0	3	3	0	0	0	0	3	3	0	0	0	0	3	3	10.2	10.2	10.2	79.953	725	725;725	0	13.798	0	0	0	0	5.2	5	82400000
	Tb927.11.6230:mRNA-p1	Tb927.11.6230:mRNA-p1	Tb927.11.6230	pretranslocation protein, alpha subunit, SEC61	Vesicular.transport	0	1	0	1	6	6	6	1	6	6	6	1	0	0	1	5	1	1	0	0	1	5	1	1	0	0	1	5	1	15.8	15.8	15.8	53.647	481	481	0	23.61	3.3	0	0	3.7	12.5	1.7	459000000
	Tb927.11.11900:mRNA-p1	Tb927.11.11900:mRNA-p1	Tb927.11.11900	coatomer gamma subunit, (Gamma-COP) COPG	Vesicular.transport	0	0	0	0	5	5	5	1	5	5	5	0	0	0	0	5	0	0	0	0	0	5	0	0	0	0	0	5	0	6.9	6.9	6.9	97.586	878	878	0	7.8992	0	0	0	0	6.9	0	186000000
	Tb927.4.1850:mRNA-p1	Tb927.4.1850:mRNA-p1	Tb927.4.1850	SRP68, putative	Vesicular.transport	0	0	0	0	5	5	5	1	5	5	5	0	0	0	0	2	4	0	0	0	0	2	4	0	0	0	0	2	4	10.2	10.2	10.2	64.384	578	578	0	13.935	0	0	0	0	5	7.3	143000000
	Tb927.7.4470:mRNA-p1	Tb927.7.4470:mRNA-p1	Tb927.7.4470	translocon-associated protein gamma 4 transmembrane domains	Vesicular.transport	0	0	0	0	5	5	5	1	5	5	5	0	0	0	0	5	1	0	0	0	0	5	1	0	0	0	0	5	1	20.2	20.2	20.2	22.398	193	193	0	12.102	0	0	0	0	20.2	7.8	419000000
	Tb927.4.5010:mRNA-p1;Tb927.8.7410:mRNA-p1	Tb927.4.5010:mRNA-p1;Tb927.8.7410:mRNA-p1	Tb927.4.5010	calreticulin, putative	Vesicular.transport	0	1	0	0	5;4	5;4	5;4	2	5	5	5	0	1	0	0	2	3	0	1	0	0	2	3	0	1	0	0	2	3	11.4	11.4	11.4	45.042	395	395;395	0	8.1839	0	4.1	0	0	6.6	8.9	96900000
	Tb927.4.760:mRNA-p1	Tb927.4.760:mRNA-p1	Tb927.4.760	adaptin complex AP1 gamma subunit	Vesicular.transport	0	0	0	0	3	3	3	1	3	3	3	0	0	0	1	3	0	0	0	0	1	3	0	0	0	0	1	3	0	4	4	4	87.344	801	801	0	6.161	0	0	0	1.6	4	0	136000000
	Tb927.3.4000:mRNA-p1	Tb927.3.4000:mRNA-p1	Tb927.3.4000	Adaptin complex AP1 sigma subunit	Vesicular.transport	0	0	0	0	3	3	3	1	3	3	3	0	0	0	0	1	2	0	0	0	0	1	2	0	0	0	0	1	2	17	17	17	18.409	159	159	0	9.5398	0	0	0	0	6.3	10.7	70800000
	Tb927.10.6640:mRNA-p1	Tb927.10.6640:mRNA-p1	Tb927.10.6640	COP-coated vesicle membrane protein erv25 precursor,	Vesicular.transport	0	0	0	0	3	3	3	1	3	3	3	0	0	0	0	2	1	0	0	0	0	2	1	0	0	0	0	2	1	12.3	12.3	12.3	28.188	253	253	0	5.3746	0	0	0	0	9.1	3.2	54800000
	Tb927.11.15230:mRNA-p1	Tb927.11.15230:mRNA-p1	Tb927.11.15230	cytosolic coat protein, putative	Vesicular.transport	0	0	0	0	3	3	3	1	3	3	3	0	0	0	0	2	3	0	0	0	0	2	3	0	0	0	0	2	3	11.4	11.4	11.4	25.564	228	228	0	9.9753	0	0	0	0	7	11.4	130000000
	Tb927.3.1210:mRNA-p1	Tb927.3.1210:mRNA-p1	Tb927.3.1210	protein transport protein Sec24	Vesicular.transport	0	0	0	0	3	3	3	1	3	3	3	0	0	0	0	3	0	0	0	0	0	3	0	0	0	0	0	3	0	3.4	3.4	3.4	108.19	973	973	0	7.1143	0	0	0	0	3.4	0	49400000
	Tb927.10.12960:mRNA-p1	Tb927.10.12960:mRNA-p1	Tb927.10.12960	ras-related protein rab-5,small GTPase, putative (RAB5A)	Vesicular.transport	0	0	0	0	3	3	3	1	3	3	3	0	0	0	0	2	1	0	0	0	0	2	1	0	0	0	0	2	1	19.1	19.1	19.1	24.484	230	230	0	7.3364	0	0	0	0	15.7	3.5	192000000
	Tb927.11.15240:mRNA-p1	Tb927.11.15240:mRNA-p1	Tb927.11.15240	Ras-related protein RAB2B, putative	Vesicular.transport	0	0	0	0	3	3	3	1	3	3	3	0	0	0	0	0	3	0	0	0	0	0	3	0	0	0	0	0	3	15.1	15.1	15.1	23.511	212	212	0	2.2808	0	0	0	0	0	15.1	74100000
	Tb927.8.4610:mRNA-p1	Tb927.8.4610:mRNA-p1	Tb927.8.4610	Ras-related protein RabX1	Vesicular.transport	0	0	0	0	3	2	2	1	3	2	2	0	0	0	0	2	2	0	0	0	0	1	1	0	0	0	0	1	1	17	11.9	11.9	24.018	218	218	0	3.4834	0	0	0	0	12.4	9.6	30600000
	Tb927.9.10010:mRNA-p1	Tb927.9.10010:mRNA-p1	Tb927.9.10010	Sec63 homologue, chaperone protein DNAj	Vesicular.transport	0	0	0	0	3	3	3	1	3	3	3	0	0	0	0	3	0	0	0	0	0	3	0	0	0	0	0	3	0	8.2	8.2	8.2	56.711	490	490	0	4.5325	0	0	0	0	8.2	0	60400000
	Tb927.9.11480:mRNA-p1	Tb927.9.11480:mRNA-p1	Tb927.9.11480	ESP9 Enriched in surface-labeled proteome	Vesicular.transport	0	0	0	0	2	2	2	1	2	2	2	0	0	0	0	1	1	0	0	0	0	1	1	0	0	0	0	1	1	4.5	4.5	4.5	62.474	561	561	0	9.5987	0	0	0	0	1.2	3.2	37400000
	Tb927.11.7510:mRNA-p1;Tb927.11.7460:mRNA-p1	Tb927.11.7510:mRNA-p1;Tb927.11.7460:mRNA-p1	Tb927.11.7510	luminal binding protein 1 (BiP), putative	Vesicular.transport	0	0	0	0	2;2	2;2	2;2	2	2	2	2	0	0	0	0	0	2	0	0	0	0	0	2	0	0	0	0	0	2	3.5	3.5	3.5	71.434	653	653;653	0	5.5092	0	0	0	0	0	3.5	79900000
	Tb927.8.3660:mRNA-p1	Tb927.8.3660:mRNA-p1	Tb927.8.3660	protein transport protein SEC23	Vesicular.transport	0	0	0	0	2	2	2	1	2	2	2	0	0	0	0	2	0	0	0	0	0	2	0	0	0	0	0	2	0	2.2	2.2	2.2	106.63	969	969	0	4.4747	0	0	0	0	2.2	0	43800000
	Tb927.3.5420:mRNA-p1	Tb927.3.5420:mRNA-p1	Tb927.3.5420	protein transport protein Sec24	Vesicular.transport	0	0	0	0	2	2	2	1	2	2	2	0	0	0	0	2	0	0	0	0	0	2	0	0	0	0	0	2	0	2.2	2.2	2.2	100.87	903	903	0	4.4077	0	0	0	0	2.2	0	36600000
	Tb927.11.13750:mRNA-p1	Tb927.11.13750:mRNA-p1	Tb927.11.13750	Ras-related protein Rab4	Vesicular.transport	0	0	0	0	2	1	1	1	2	1	1	0	0	0	0	2	1	0	0	0	0	1	0	0	0	0	0	1	0	13.1	7.6	7.6	22.057	198	198	0	3.5028	0	0	0	0	13.1	5.6	7050000
	Tb927.10.15520:mRNA-p1;Tb11.v5.0812.1-p1	Tb927.10.15520:mRNA-p1;Tb11.v5.0812.1-p1	Tb927.10.15520	signal recognition particle protein, putative	Vesicular.transport	0	0	0	0	2;1	2;1	2;1	2	2	2	2	0	0	0	0	1	1	0	0	0	0	1	1	0	0	0	0	1	1	5	5	5	76.262	676	676;340	0	5.1166	0	0	0	0	3	2.1	34600000
	Tb927.11.9890:mRNA-p1	Tb927.11.9890:mRNA-p1	Tb927.11.9890	signal recognition particle receptor alpha subunit, putative	Vesicular.transport	0	0	0	0	2	2	2	1	2	2	2	0	0	0	1	1	0	0	0	0	1	1	0	0	0	0	1	1	0	3.4	3.4	3.4	63.526	582	582	0	3.9786	0	0	0	2.1	1.4	0	11000000
	Tb927.7.2190:mRNA-p1	Tb927.7.2190:mRNA-p1	Tb927.7.2190	Translocon-associated protein alpha subunit	Vesicular.transport	0	0	0	0	2	2	2	1	2	2	2	0	0	0	0	1	2	0	0	0	0	1	2	0	0	0	0	1	2	7.5	7.5	7.5	29.242	266	266	0	4.1027	0	0	0	0	3	7.5	70200000
	Tb927.8.5250:mRNA-p1	Tb927.8.5250:mRNA-p1	Tb927.8.5250	coatomer delta subunit, ,delta-COP	Vesicular.transport	0	0	0	0	1	1	1	1	1	1	1	0	0	0	0	0	1	0	0	0	0	0	1	0	0	0	0	0	1	2.1	2.1	2.1	57.33	531	531	0.0012484	1.8522	0	0	0	0	0	2.1	7440000
	Tb927.4.1090:mRNA-p1	Tb927.4.1090:mRNA-p1	Tb927.4.1090	endosomal integral membrane protein, putative	Vesicular.transport	0	0	0	0	1	1	1	1	1	1	1	0	0	0	0	1	0	0	0	0	0	1	0	0	0	0	0	1	0	2.1	2.1	2.1	69.939	634	634	1	-2	0	0	0	0	2.1	0	11700000
	Tb927.11.3470:mRNA-p1	Tb927.11.3470:mRNA-p1	Tb927.11.3470	endosomal integral membrane protein, putative	Vesicular.transport	0	0	0	0	1	1	1	1	1	1	1	0	0	0	0	1	0	0	0	0	0	1	0	0	0	0	0	1	0	3.3	3.3	3.3	68.273	607	607	0	10.985	0	0	0	0	3.3	0	18700000
	Tb927.11.10690:mRNA-p1	Tb927.11.10690:mRNA-p1	Tb927.11.10690	hypothetical protein, conserved	Vesicular.transport	0	0	0	0	1	1	1	1	1	1	1	0	0	0	0	1	0	0	0	0	0	1	0	0	0	0	0	1	0	4.4	4.4	4.4	45.229	408	408	0	3.5287	0	0	0	0	4.4	0	20900000
	Tb927.10.6230:mRNA-p1	Tb927.10.6230:mRNA-p1	Tb927.10.6230	hypothetical protein, conserved,MORN repeat containing protein	Vesicular.transport	0	0	0	0	1	1	1	1	1	1	1	0	0	0	0	1	1	0	0	0	0	1	1	0	0	0	0	1	1	1.2	1.2	1.2	77.026	690	690	0.00883	1.194	0	0	0	0	1.2	1.2	0
	Tb927.4.3380:mRNA-p1	Tb927.4.3380:mRNA-p1	Tb927.4.3380	MYO1 myosin IB heavy chain, in Tc vacuolar proteome and clathrin-associated	Vesicular.transport	0	0	0	0	1	1	1	1	1	1	1	0	0	0	0	1	0	0	0	0	0	1	0	0	0	0	0	1	0	1.6	1.6	1.6	131.76	1167	1167	0	3.5146	0	0	0	0	1.6	0	25400000
	Tb927.3.960:mRNA-p1	Tb927.3.960:mRNA-p1	Tb927.3.960	protein transport protein Sec61 gamma subunit, putative	Vesicular.transport	0	0	0	0	1	1	1	1	1	1	1	0	0	0	0	1	0	0	0	0	0	1	0	0	0	0	0	1	0	24.6	24.6	24.6	7.6681	69	69	0	3.1118	0	0	0	0	24.6	0	50800000
	Tb927.3.3850:mRNA-p1	Tb927.3.3850:mRNA-p1	Tb927.3.3850	Sec23-binding domain of Sec16, matches yeast proline-rich domain proteins associated with actin organisation	Vesicular.transport	0	0	0	0	1	1	1	1	1	1	1	0	0	0	0	1	0	0	0	0	0	1	0	0	0	0	0	1	0	1	1	1	146.55	1387	1387	0	4.5159	0	0	0	0	1	0	14700000
	Tb927.8.4770:mRNA-p1	Tb927.8.4770:mRNA-p1	Tb927.8.4770	small GTP-binding protein Rab18	Vesicular.transport	0	0	0	0	1	1	1	1	1	1	1	0	0	0	0	1	1	0	0	0	0	1	1	0	0	0	0	1	1	3.7	3.7	3.7	23.467	215	215	0	3.2835	0	0	0	0	3.7	3.7	387000000
	Tb927.9.10640:mRNA-p1	Tb927.9.10640:mRNA-p1	Tb927.9.10640	synaptojanin (N-terminal domain), putative	Vesicular.transport	0	0	0	0	1	1	1	1	1	1	1	0	0	0	0	1	0	0	0	0	0	1	0	0	0	0	0	1	0	1.1	1.1	1.1	83.045	755	755	0.0024301	1.7066	0	0	0	0	1.1	0	13900000
	Tb927.8.5030:mRNA-p1	Tb927.8.5030:mRNA-p1	Tb927.8.5030	trafficking protein particle complex subunit 3, (TRAPP) component, Bet3	Vesicular.transport	0	0	0	0	1	1	1	1	1	1	1	0	0	0	0	0	1	0	0	0	0	0	1	0	0	0	0	0	1	4.1	4.1	4.1	20.947	193	193	0.0097614	1.1378	0	0	0	0	0	4.1	33700000
	Tb10.v4.0168:pseudogenic_transcript-p1	Tb10.v4.0168:pseudogenic_transcript-p1	Tb10.v4.0168	VSG pseudogene	VSG	0	0	0	0	3	3	3	1	3	3	3	0	0	0	0	3	1	0	0	0	0	3	1	0	0	0	0	3	1	4	4	4	53.478	496	496	0	11.058	0	0	0	0	4	2	447000000
	Tb927.9.400:pseudogenic_transcript-p1	Tb927.9.400:pseudogenic_transcript-p1	Tb927.9.400	VSG pseudogene	VSG	0	0	0	0	2	2	2	1	2	2	2	0	0	0	0	0	2	0	0	0	0	0	2	0	0	0	0	0	2	1.9	1.9	1.9	55.637	524	524	0	2.5792	0	0	0	0	0	1.9	94100000
	Tb927.5.4950:mRNA-p1;Tb11.v5.0916.1-p1	Tb927.5.4950:mRNA-p1;Tb11.v5.0916.1-p1	Tb927.5.4950	variant surface glycoprotein (VSG, atypical), putative	VSG	0	0	0	0	1;1	1;1	1;1	2	1	1	1	0	0	0	0	0	1	0	0	0	0	0	1	0	0	0	0	0	1	1.7	1.7	1.7	57.346	533	533;533	1	-2	0	0	0	0	0	1.7	32100000
	Tb927.6.5480:pseudogenic_transcript-p1;Tb927.9.190:mRNA-p1	Tb927.6.5480:pseudogenic_transcript-p1;Tb927.9.190:mRNA-p1	Tb927.6.5480	VSG pseudogene,variant surface glycoprotein, degenerate	VSG	0	0	0	0	1;1	1;1	1;1	2	1	1	1	0	0	0	0	1	0	0	0	0	0	1	0	0	0	0	0	1	0	3	3	3	50.593	470	470;499	0.0087432	1.1687	0	0	0	0	3	0	135000000
	Tb927.4.4670:mRNA-p1	Tb927.4.4670:mRNA-p1	Tb927.4.4670	MYND finger, putative	Zinc.finger	0	0	0	0	1	1	1	1	1	1	1	0	0	0	0	0	1	0	0	0	0	0	1	0	0	0	0	0	1	2.3	2.3	2.3	54.134	483	483	0.0087051	1.1574	0	0	0	0	0	2.3	10700000
	Tb927.11.16670:mRNA-p1	Tb927.11.16670:mRNA-p1	Tb927.11.16670	MYND zinc finger	Zinc.finger	0	0	0	0	1	1	1	1	1	1	1	0	0	0	0	0	1	0	0	0	0	0	1	0	0	0	0	0	1	1.9	1.9	1.9	63.505	570	570	0.0012821	1.9877	0	0	0	0	0	1.9	0
	Tb927.10.12940:mRNA-p1	Tb927.10.12940:mRNA-p1	Tb927.10.12940	predicted zinc finger protein	Zinc.finger	0	0	0	0	1	1	1	1	1	1	1	0	0	0	0	1	0	0	0	0	0	1	0	0	0	0	0	1	0	2.5	2.5	2.5	34.477	324	324	0.0097508	1.1323	0	0	0	0	2.5	0	0
	Tb927.6.3640:mRNA-p1	Tb927.6.3640:mRNA-p1	Tb927.6.3640	zinc finger of C3HC4-type, RING/B-box zinc finger, putative	Zinc.finger	0	0	0	0	1	1	1	1	1	1	1	0	0	0	0	0	1	0	0	0	0	0	1	0	0	0	0	0	1	1.8	1.8	1.8	62.901	561	561	0	2.6163	0	0	0	0	0	1.8	9650000
+	Tb927.8.1290:mRNA-p1	Tb927.8.1290:mRNA-p1	Tb927.8.1290	hypothetical protein, conserved, no domains, copurifies with ZC3H32	ZUnknown	0	0	1	1	30	30	30	1	30	30	30	0	0	0	17	22	8	0	0	0	17	22	8	0	0	0	17	22	8	32.5	32.5	32.5	120.05	1106	1106	0	138.72	0	0	0	17.5	26.9	7.6	2690000000
+	Tb927.4.1300:mRNA-p1	Tb927.4.1300:mRNA-p1	Tb927.4.1300	amidinotransferase, putative	ZUnknown	0	3	1	1	21	21	21	1	21	21	21	1	3	1	3	18	12	1	3	1	3	18	12	1	3	1	3	18	12	58.6	58.6	58.6	42.015	374	374	0	323.31	2.7	10.2	2.7	5.6	50.5	34.8	5060000000
+	Tb11.v5.0365.1-p1;Tb11.v5.0366.1-p1;Tb927.11.12880:mRNA-p1;Tb927.11.12870:mRNA-p1	Tb11.v5.0365.1-p1;Tb11.v5.0366.1-p1;Tb927.11.12880:mRNA-p1	Tb927.11.12880	Found in FAZ and cytoplasm, also called POMP17	ZUnknown	0	0	1	1	15;10;8;3	15;10;8;3	15;10;8;3	4	15	15	15	0	0	0	3	12	3	0	0	0	3	12	3	0	0	0	3	12	3	21.4	21.4	21.4	82.854	746	746;1082;1090;735	0	42.875	0	0	0	4.6	16.8	3.8	514000000
	Tb927.7.7460:mRNA-p1	Tb927.7.7460:mRNA-p1	Tb927.7.7460	hypothetical protein, conserved, no domains	ZUnknown	0	3	1	1	12	12	12	1	12	12	12	1	3	2	3	11	5	1	3	2	3	11	5	1	3	2	3	11	5	65.6	65.6	65.6	22.358	192	192	0	116.11	4.2	16.1	9.4	15.1	65.6	29.2	3820000000
+	Tb927.8.1500:mRNA-p1	Tb927.8.1500:mRNA-p1	Tb927.8.1500	hypothetical protein, conserved, copurifies with MKT1	ZUnknown	0	2	1	1	9	9	9	1	9	9	9	0	1	2	5	8	6	0	1	2	5	8	6	0	1	2	5	8	6	22.6	22.6	22.6	63.206	601	601	0	89.611	0	1.8	5.2	14.3	21.1	14.1	1560000000
	Tb927.6.2210:mRNA-p1	Tb927.6.2210:mRNA-p1	Tb927.6.2210	hypothetical protein, conserved, copurifies with ZC3H32 and 4EIP	ZUnknown	0	5	1	1	9	9	9	1	9	9	9	5	0	0	2	6	2	5	0	0	2	6	2	5	0	0	2	6	2	9	9	9	123.85	1128	1128	0	86.04	5.1	0	0	1.2	6.2	2.5	343000000
	Tb10.v4.0053:mRNA-p1;Tb10.v4.0052:mRNA-p1;Tb927.10.10280:mRNA-p1;Tb927.10.10360:mRNA-p1	Tb10.v4.0053:mRNA-p1;Tb10.v4.0052:mRNA-p1;Tb927.10.10280:mRNA-p1;Tb927.10.10360:mRNA-p1	Tb10.v4.0053	hypothetical protein, 411 kDa mostly peptide repeats	ZUnknown	0	1	1	1	7;7;6;5	7;7;6;5	7;7;6;5	4	7	7	7	1	0	0	6	4	3	1	0	0	6	4	3	1	0	0	6	4	3	15.1	15.1	15.1	483.8	4119	4119;4880;2371;3198	0	21.404	0.6	0	0	14	5.5	3.1	1200000000
	Tb927.10.14700:mRNA-p1	Tb927.10.14700:mRNA-p1	Tb927.10.14700	hypothetical protein, conserved, no human or yeast homologue	ZUnknown	0	2	1	1	7	7	7	1	7	7	7	1	2	2	2	5	5	1	2	2	2	5	5	1	2	2	2	5	5	19.6	19.6	19.6	37.7	342	342	0	10.213	3.5	7.3	7.3	6.4	16.7	16.1	788000000
	Tb927.3.3560:mRNA-p1	Tb927.3.3560:mRNA-p1	Tb927.3.3560	U-box domain containing protein, putative	ZUnknown	0	0	0	0	16	16	16	1	16	16	16	0	0	0	0	11	10	0	0	0	0	11	10	0	0	0	0	11	10	29	29	29	69.087	624	624	0	48.015	0	0	0	0	19.4	18.4	1250000000
	Tb927.1.1500:mRNA-p1	Tb927.1.1500:mRNA-p1	Tb927.1.1500	conserved protein, unknown function	ZUnknown	0	0	0	1	11	11	11	1	11	11	11	0	0	0	1	8	7	0	0	0	1	8	7	0	0	0	1	8	7	17.9	17.9	17.9	73.618	664	664	0	30.855	0	0	0	1.5	13.6	10.4	461000000
	Tb927.8.3850:mRNA-p1	Tb927.8.3850:mRNA-p1	Tb927.8.3850	PSP1 C-terminal conserved region, putative	ZUnknown	0	1	0	0	9	9	9	1	9	9	9	0	0	1	0	7	6	0	0	1	0	7	6	0	0	1	0	7	6	26.7	26.7	26.7	41.994	386	386	0	66.173	0	0	1.8	0	24.6	15.5	968000000
	Tb927.10.1310:mRNA-p1	Tb927.10.1310:mRNA-p1	Tb927.10.1310	Domain of unknown function (DUF4042), putative	ZUnknown	0	6	0	0	9	9	9	1	9	9	9	6	0	0	0	3	0	6	0	0	0	3	0	6	0	0	0	3	0	13.7	13.7	13.7	102.74	944	944	0	17.081	8.4	0	0	0	5.3	0	54600000
	Tb927.10.12820:mRNA-p1	Tb927.10.12820:mRNA-p1	Tb927.10.12820	Cysteine proteinase domains by interpro but not NCBI	ZUnknown	0	0	0	0	8	8	8	1	8	8	8	0	0	0	0	8	4	0	0	0	0	8	4	0	0	0	0	8	4	9.5	9.5	9.5	110.24	1013	1013	0	31.895	0	0	0	0	9.5	5.1	583000000
	Tb11.v5.0154.1-p1	Tb11.v5.0154.1-p1	Tb11.v5.0154	WD domain, G-beta repeat, putative	ZUnknown	0	0	0	1	7	1	1	1	7	1	1	0	0	0	1	4	5	0	0	0	1	0	0	0	0	0	1	0	0	11.5	2.4	2.4	77.689	698	698	1	-2	0	0	0	2.4	6.4	9.7	1720000
	Tb927.11.2540:mRNA-p1	Tb927.11.2540:mRNA-p1	Tb927.11.2540	hypothetical protein, conserved	ZUnknown	0	0	0	0	7	7	7	1	7	7	7	0	0	0	0	5	5	0	0	0	0	5	5	0	0	0	0	5	5	31.3	31.3	31.3	33.848	297	297	0	30.068	0	0	0	0	21.2	21.9	207000000
	Tb927.7.3040:mRNA-p1	Tb927.7.3040:mRNA-p1	Tb927.7.3040	hypothetical protein, conserved	ZUnknown	0	0	0	0	7	7	7	1	7	7	7	0	0	0	0	5	3	0	0	0	0	5	3	0	0	0	0	5	3	14	14	14	69.073	635	635	0	23.571	0	0	0	0	10.9	4.7	399000000
	Tb927.9.15070:mRNA-p1	Tb927.9.15070:mRNA-p1	Tb927.9.15070	hypothetical protein, conserved	ZUnknown	0	0	0	0	7	7	7	1	7	7	7	0	0	0	0	5	2	0	0	0	0	5	2	0	0	0	0	5	2	9	9	9	82.306	737	737	0	12.242	0	0	0	0	6.4	2.6	108000000
	Tb927.5.2320:mRNA-p1	Tb927.5.2320:mRNA-p1	Tb927.5.2320	Mak10 subunit, NatC N(alpha)-terminal acetyltransferase, putative	ZUnknown	0	0	0	0	7	7	7	1	7	7	7	0	0	0	0	4	3	0	0	0	0	4	3	0	0	0	0	4	3	8	8	8	82.159	736	736	0	8.6267	0	0	0	0	4.6	3.4	69100000
	Tb927.11.14750:mRNA-p1	Tb927.11.14750:mRNA-p1	Tb927.11.14750	PSP1 C-terminal conserved region, putative	ZUnknown	0	0	0	0	7	7	7	1	7	7	7	0	0	0	0	3	5	0	0	0	0	3	5	0	0	0	0	3	5	22	22	22	42.2	372	372	0	19.971	0	0	0	0	12.1	14.5	172000000
	Tb927.7.4700:mRNA-p1	Tb927.7.4700:mRNA-p1	Tb927.7.4700	WD domain, G-beta repeat, putative	ZUnknown	0	0	0	0	7	7	1	1	7	7	1	0	0	0	0	5	6	0	0	0	0	5	6	0	0	0	0	1	1	15.6	15.6	4.7	77.7	698	698	0	76.523	0	0	0	0	11.2	14.5	680000000
	Tb927.8.5760:mRNA-p1	Tb927.8.5760:mRNA-p1	Tb927.8.5760	Ankyrin repeats (many copies)/Alpha/beta hydrolase family, putative	ZUnknown	0	0	0	0	6	6	6	1	6	6	6	0	0	0	0	5	1	0	0	0	0	5	1	0	0	0	0	5	1	13	13	13	53.809	478	478	0	11.2	0	0	0	0	13	2.9	257000000
	Tb927.9.7690:mRNA-p1	Tb927.9.7690:mRNA-p1	Tb927.9.7690	hypothetical protein, conserved, nucelotidyltransferase and poly(A) polymerase substrate binding domains	ZUnknown	0	0	0	0	6	6	6	1	6	6	6	0	0	0	4	2	0	0	0	0	4	2	0	0	0	0	4	2	0	4.1	4.1	4.1	199.56	1857	1857	0	45.109	0	0	0	2.8	1.3	0	52300000
	Tb927.11.4910:mRNA-p1	Tb927.11.4910:mRNA-p1	Tb927.11.4910	predicted ankyrin repeat family protein	ZUnknown	0	0	0	0	6	6	6	1	6	6	6	0	0	0	0	2	5	0	0	0	0	2	5	0	0	0	0	2	5	16.6	16.6	16.6	43.647	392	392	0	14.161	0	0	0	0	8.4	13.5	357000000
	Tb927.11.4360:mRNA-p1	Tb927.11.4360:mRNA-p1	Tb927.11.4360	Protein of unknown function (DUF1014), putative	ZUnknown	0	0	0	0	6	6	6	1	6	6	6	0	0	0	0	0	6	0	0	0	0	0	6	0	0	0	0	0	6	29.2	29.2	29.2	29.673	257	257	0	67.768	0	0	0	0	0	29.2	359000000
	Tb927.7.4500:mRNA-p1;Tb11.v5.0263.1-p1	Tb927.7.4500:mRNA-p1;Tb11.v5.0263.1-p1	Tb927.7.4500	PX domain containing protein, putative	ZUnknown	0	0	0	0	6;6	6;6	6;6	2	6	6	6	0	0	0	0	2	4	0	0	0	0	2	4	0	0	0	0	2	4	10	10	10	58.428	528	528;528	0	8.761	0	0	0	0	4	6.1	404000000
	Tb927.7.4460:mRNA-p1	Tb927.7.4460:mRNA-p1	Tb927.7.4460	von Willebrand factor type A domain containing protein, putative	ZUnknown	0	0	0	0	6	6	6	1	6	6	6	0	0	0	0	3	4	0	0	0	0	3	4	0	0	0	0	3	4	9.6	9.6	9.6	91.199	842	842	0	21.675	0	0	0	0	4.9	6.8	284000000
	Tb927.4.4580:mRNA-p1	Tb927.4.4580:mRNA-p1	Tb927.4.4580	hypothetical protein, conserved, no clear yeast or human matches	ZUnknown	0	1	0	0	6	6	6	1	6	6	6	1	0	0	0	5	1	1	0	0	0	5	1	1	0	0	0	5	1	7.1	7.1	7.1	118.19	1083	1083	0	11.122	1.8	0	0	0	6.3	0.8	106000000
	Tb927.10.15330:mRNA-p1;Tb11.v5.0348.1-p1	Tb927.10.15330:mRNA-p1;Tb11.v5.0348.1-p1	Tb927.10.15330	CYTH domain containing protein, putative	ZUnknown	0	0	0	0	5;3	5;3	5;3	2	5	5	5	0	0	0	0	3	2	0	0	0	0	3	2	0	0	0	0	3	2	8.1	8.1	8.1	68.478	605	605;571	0	6.084	0	0	0	0	4.5	3.6	73700000
	Tb927.5.2000:mRNA-p1	Tb927.5.2000:mRNA-p1	Tb927.5.2000	hypothetical protein copurifies with MKT1 & XAC1, one Q8, salivaria & stercoraria only, well translated only in bloodstream forms	ZUnknown	0	0	0	0	5	5	5	1	5	5	5	0	0	0	0	4	2	0	0	0	0	4	2	0	0	0	0	4	2	15.2	15.2	15.2	38.829	361	361	0	7.4865	0	0	0	0	12.5	5.5	214000000
	Tb927.7.1330:mRNA-p1	Tb927.7.1330:mRNA-p1	Tb927.7.1330	hypothetical protein, conserved	ZUnknown	0	0	0	0	5	5	5	1	5	5	5	0	0	0	0	4	2	0	0	0	0	4	2	0	0	0	0	4	2	14.4	14.4	14.4	39.755	355	355	0	10.052	0	0	0	0	11.8	4.5	145000000
	Tb927.1.3260:mRNA-p1	Tb927.1.3260:mRNA-p1	Tb927.1.3260	hypothetical protein, conserved	ZUnknown	0	0	0	0	5	5	5	1	5	5	5	0	0	0	1	4	0	0	0	0	1	4	0	0	0	0	1	4	0	3.5	3.5	3.5	203.06	1886	1886	0	9.3012	0	0	0	0.7	2.8	0	71200000
	Tb927.11.5150:mRNA-p1	Tb927.11.5150:mRNA-p1	Tb927.11.5150	hypothetical protein, conserved, no homologues	ZUnknown	0	0	0	0	5	5	5	1	5	5	5	0	0	0	0	3	2	0	0	0	0	3	2	0	0	0	0	3	2	13.6	13.6	13.6	57.047	528	528	0	15.575	0	0	0	0	9.8	3.8	111000000
	Tb927.4.590:mRNA-p1	Tb927.4.590:mRNA-p1	Tb927.4.590	PQQ-like domain/Protein of unknown function (DUF1620), putative	ZUnknown	0	0	0	0	5	5	5	1	5	5	5	0	0	0	0	2	3	0	0	0	0	2	3	0	0	0	0	2	3	7.7	7.7	7.7	88.024	818	818	0	26.223	0	0	0	0	4.5	3.2	408000000
	Tb927.6.4320:mRNA-p1	Tb927.6.4320:mRNA-p1	Tb927.6.4320	Protein of unknown function (DUF2817), putative	ZUnknown	0	0	0	0	5	5	5	1	5	5	5	0	0	0	0	3	4	0	0	0	0	3	4	0	0	0	0	3	4	16.3	16.3	16.3	44.423	399	399	0	18.49	0	0	0	0	9.8	11.8	422000000
	Tb927.1.3070:mRNA-p1	Tb927.1.3070:mRNA-p1	Tb927.1.3070	hypothetical protein, conserved, poly(Q), poly(H)	ZUnknown	0	1	0	1	5	5	5	1	5	5	5	1	1	1	1	5	1	1	1	1	1	5	1	1	1	1	1	5	1	21.1	21.1	21.1	44.99	413	413	0	66.494	3.9	3.9	3.9	3.9	21.1	3.9	261000000
	Tb927.5.3250.1:mRNA-p1	Tb927.5.3250.1:mRNA-p1	Tb927.5.3250	hypothetical protein, conserved, no clear yeast or human matches	ZUnknown	0	0	0	0	5	5	5	1	5	5	5	0	0	0	0	5	0	0	0	0	0	5	0	0	0	0	0	5	0	4.5	4.5	4.5	172.16	1557	1557	0	5.7238	0	0	0	0	4.5	0	173000000
	Tb927.11.3770:mRNA-p1	Tb927.11.3770:mRNA-p1	Tb927.11.3770	Dpy-30 motif containing protein, putative	ZUnknown	0	0	0	0	4	4	4	1	4	4	4	0	0	0	0	0	4	0	0	0	0	0	4	0	0	0	0	0	4	15.6	15.6	15.6	28.969	262	262	0	8.1015	0	0	0	0	0	15.6	43600000
	Tb927.11.1420:mRNA-p1	Tb927.11.1420:mRNA-p1	Tb927.11.1420	hypothetical protein, conserved	ZUnknown	0	0	0	0	4	4	4	1	4	4	4	0	0	0	0	2	2	0	0	0	0	2	2	0	0	0	0	2	2	4.7	4.7	4.7	94.838	860	860	0	5.0045	0	0	0	0	2.4	2.2	68700000
	Tb927.10.15310:mRNA-p1;REV__Tb927.10.2600:mRNA-p1	Tb927.10.15310:mRNA-p1	Tb927.10.15310	hypothetical protein, conserved, linked to melarsoprol resistance, no yeast/human by NCBI	ZUnknown	0	0	0	0	4;1	4;1	4;1	2	4	4	4	0	0	0	2	3	0	0	0	0	2	3	0	0	0	0	2	3	0	10.2	10.2	10.2	47.654	451	451;584	0	7.1698	0	0	0	5.8	7.3	0	98000000
	Tb927.7.3980:mRNA-p1	Tb927.7.3980:mRNA-p1	Tb927.7.3980	immunodominant antigen, putative,tc40 antigen-like	ZUnknown	0	0	0	0	4	4	4	1	4	4	4	0	0	0	0	3	1	0	0	0	0	3	1	0	0	0	0	3	1	5.8	5.8	5.8	97.32	904	904	0	13.827	0	0	0	0	4.1	1.7	122000000
	Tb927.5.2250:mRNA-p1;Tb927.5.2220:mRNA-p1;Tb927.5.2190:mRNA-p1	Tb927.5.2250:mRNA-p1;Tb927.5.2220:mRNA-p1;Tb927.5.2190:mRNA-p1	Tb927.5.2250	META domain/Domain of unknown function (DUF1935), putative	ZUnknown	0	0	0	0	4;4;4	4;4;4	4;4;4	3	4	4	4	0	0	0	0	1	4	0	0	0	0	1	4	0	0	0	0	1	4	11.9	11.9	11.9	48.809	446	446;446;446	0	55.999	0	0	0	0	4.7	11.9	148000000
[truncated: 124 more rows]
[truncated: 28 more columns]
