# Supplementary figures and images for: Functional insights from a surface antigen mRNA-bound proteome
Source: eLife journal article supplement (doi:10.7554/elife.68136), 2021-03-30

## A. Bloodstream form

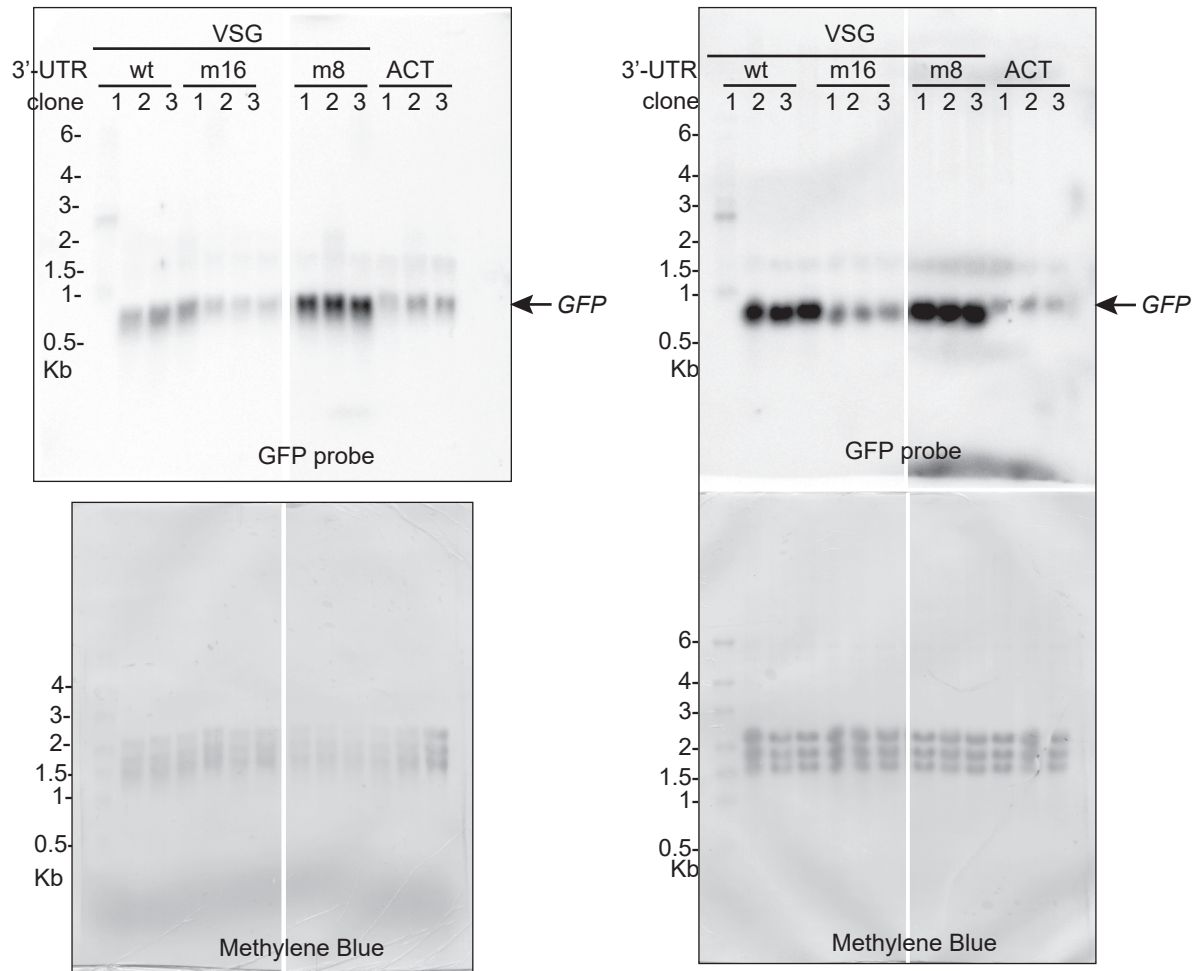

## B. Procyclic form

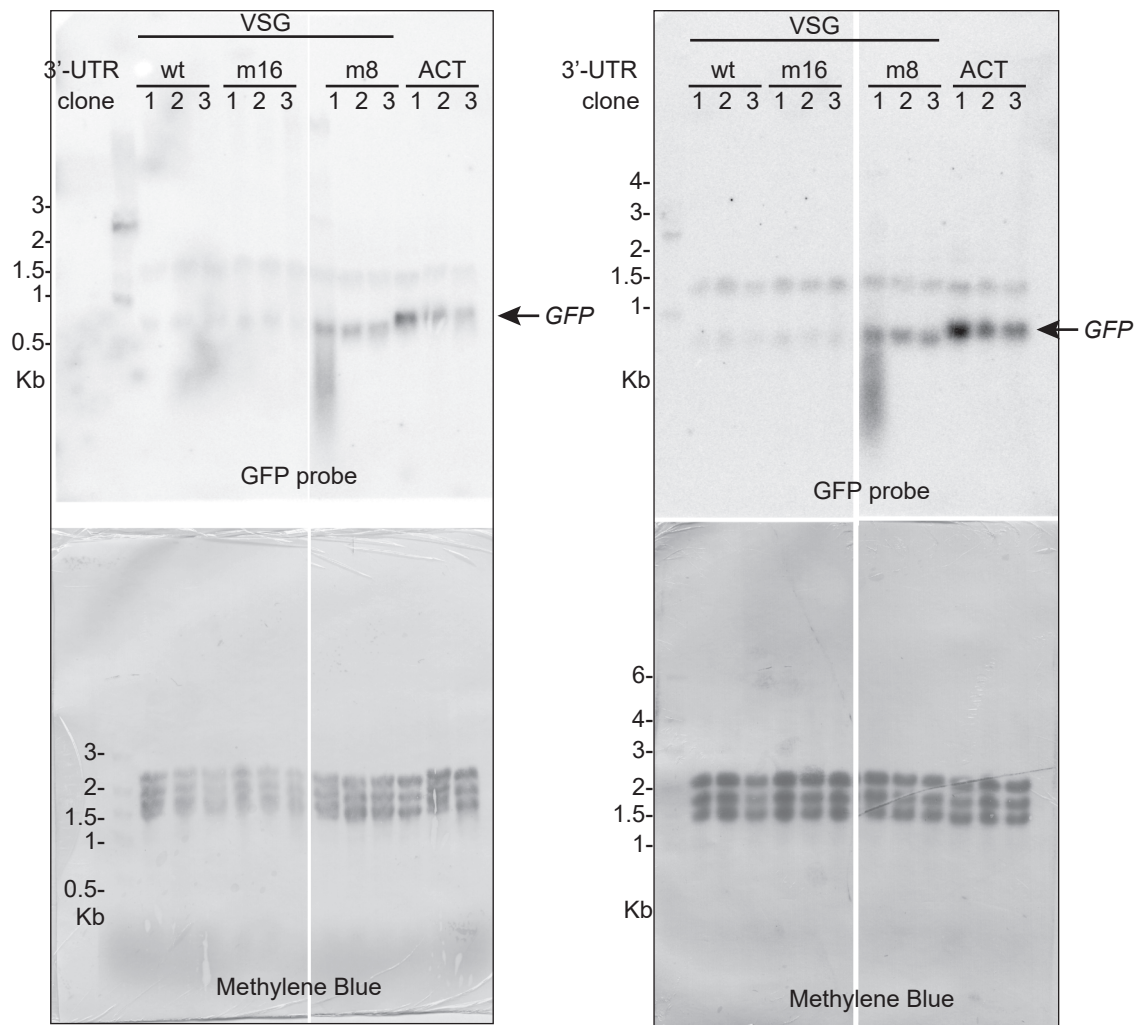

Supplement: supp [file elife-68136-supp-v1.zip]

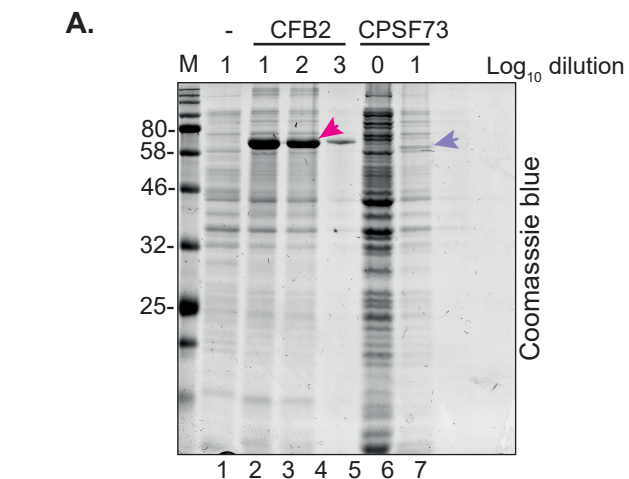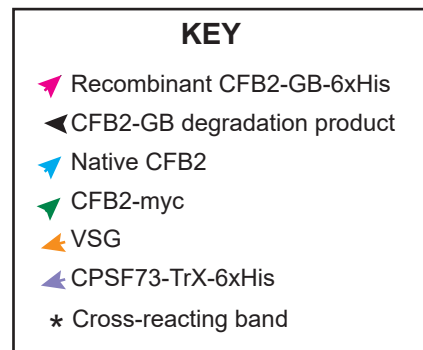

**C. RNAi and MG132**

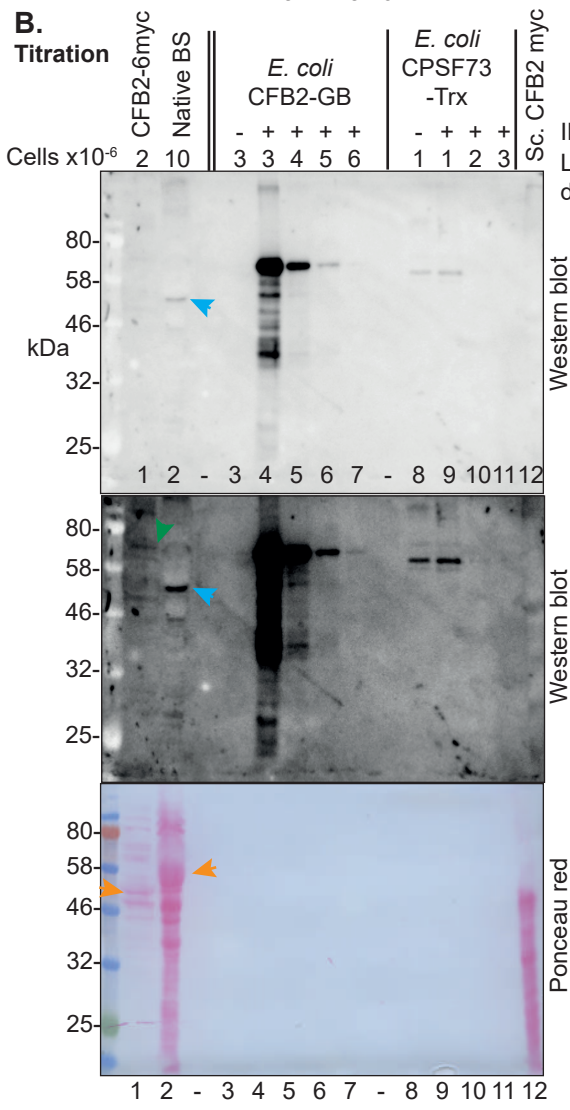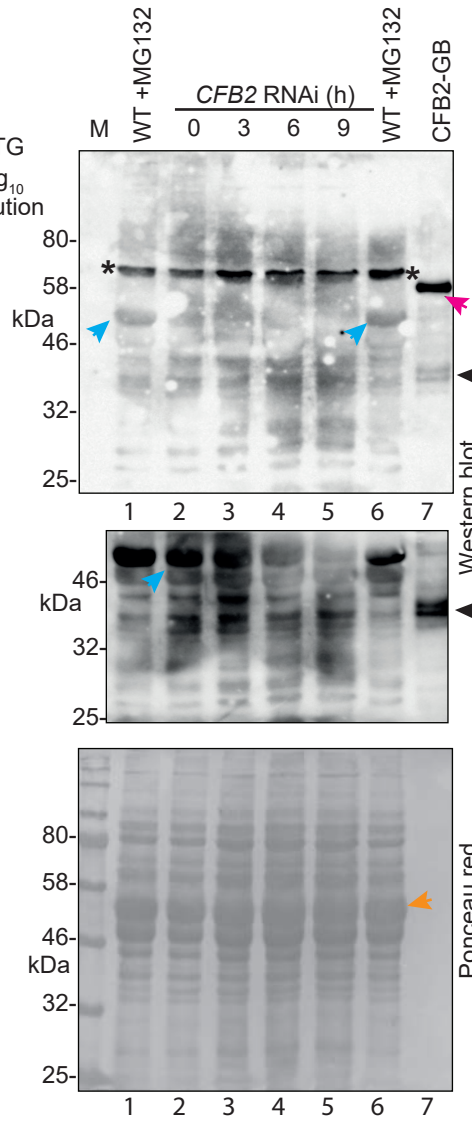

**D. Expression of fusion proteins**

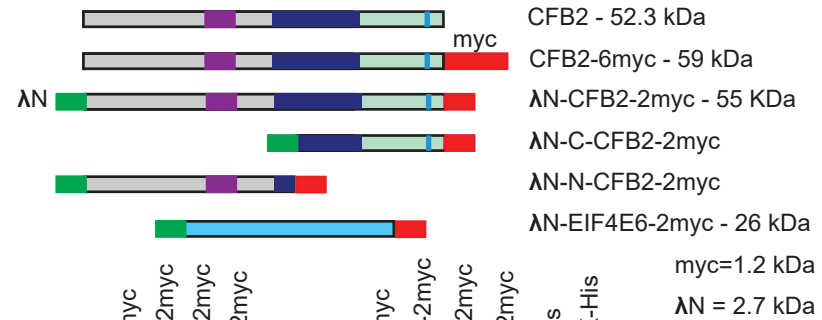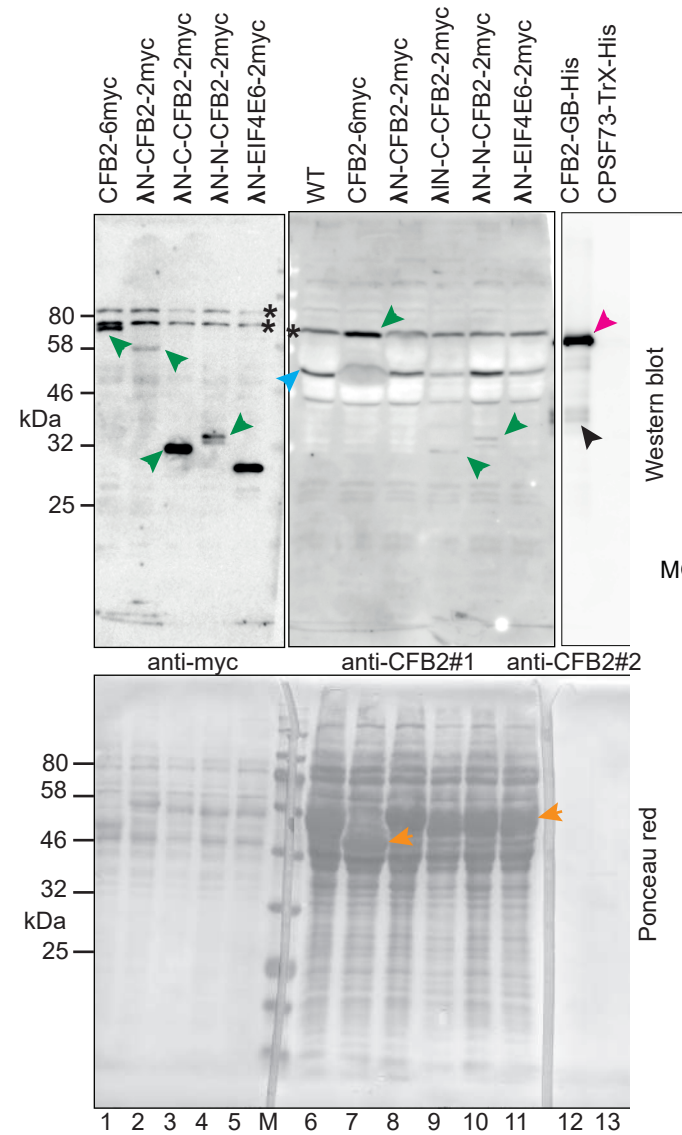

**E. Effect of MG132**

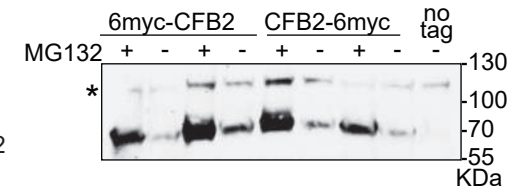

Supplement: supp [file elife-68136-supp-v1.zip]

Fig. 4

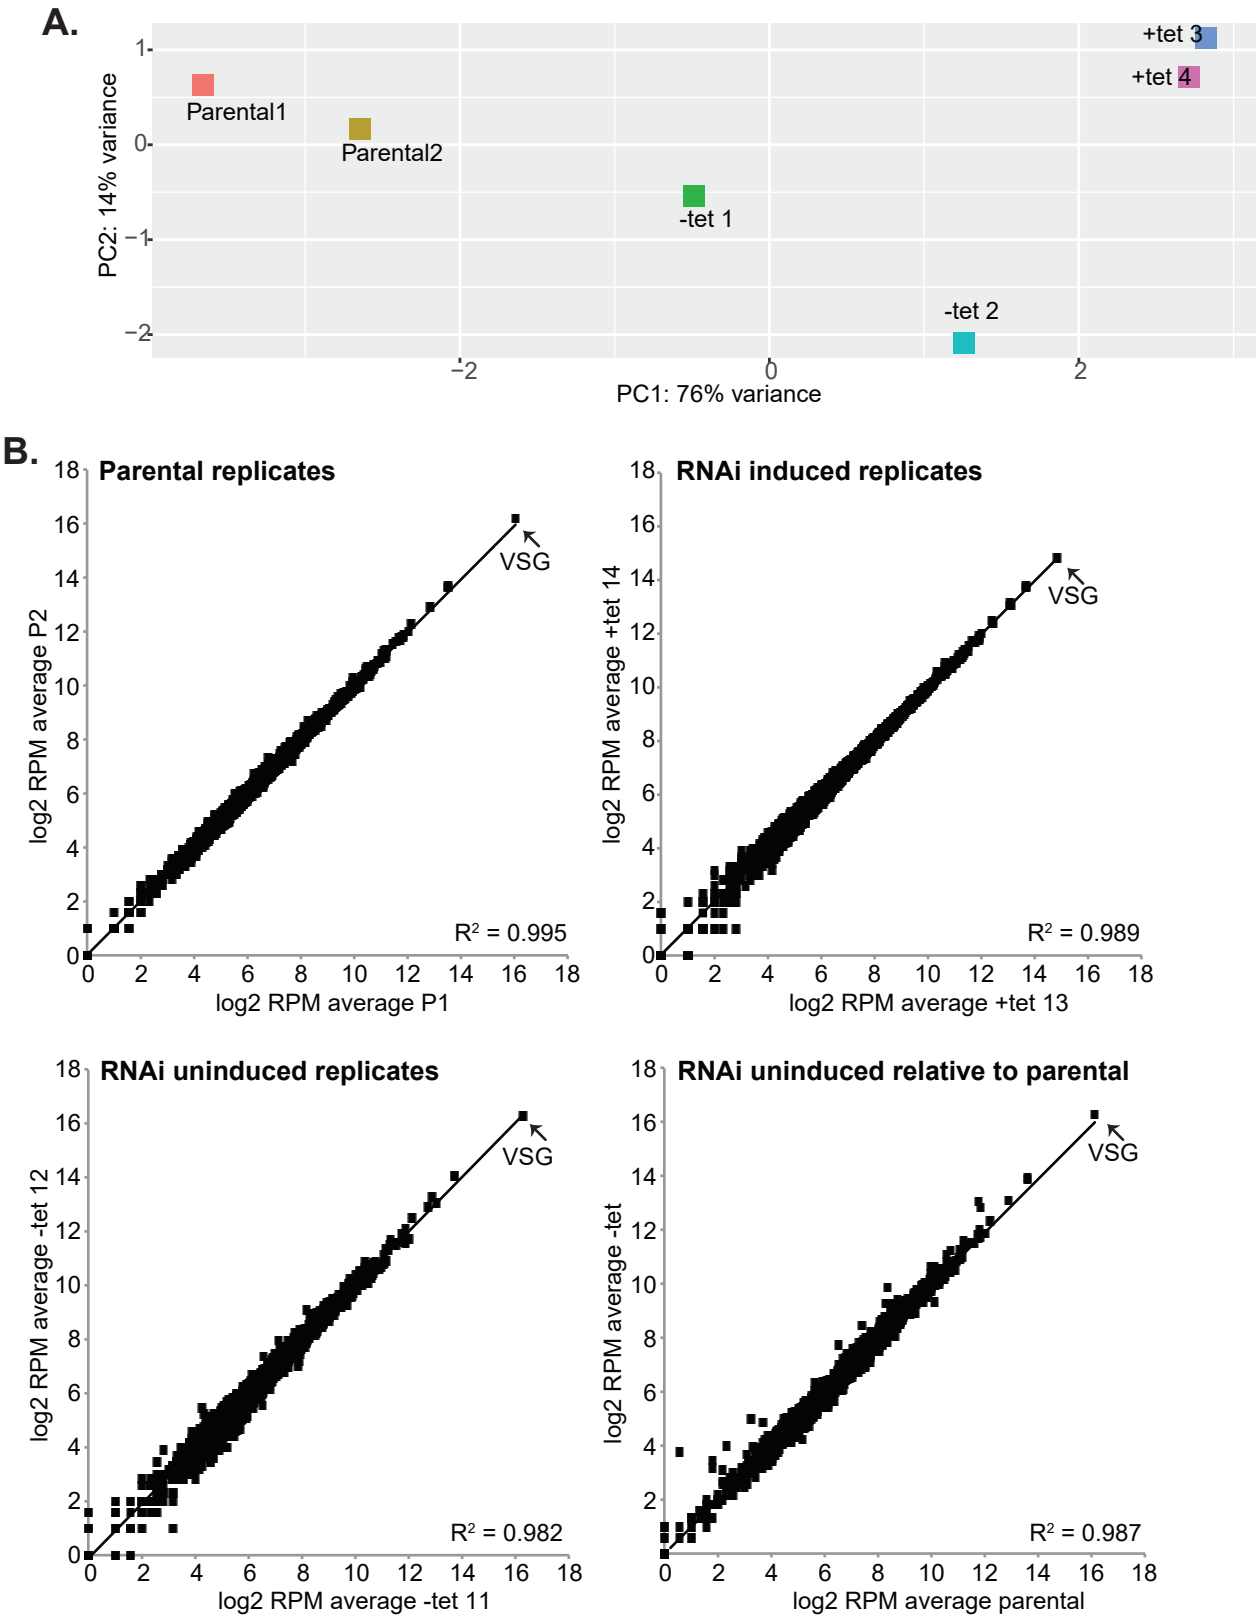

Supplement: supp [file elife-68136-supp-v1.zip]

**Fig. 13****A.**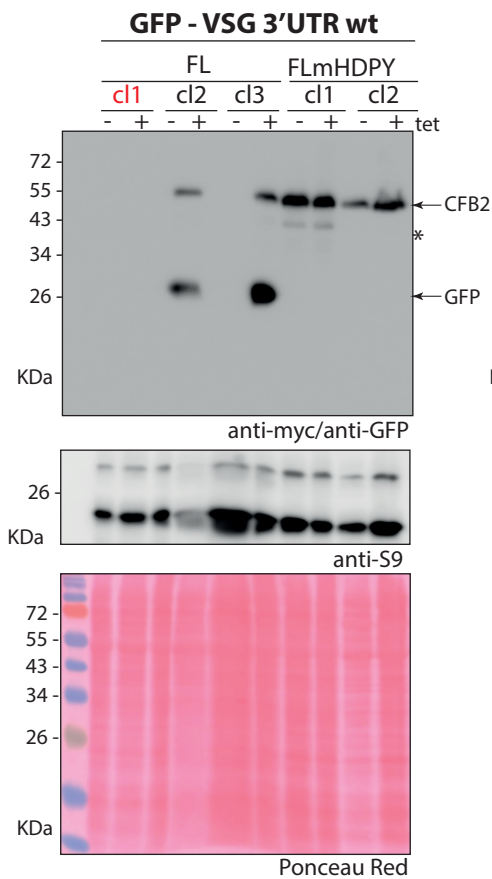**B.**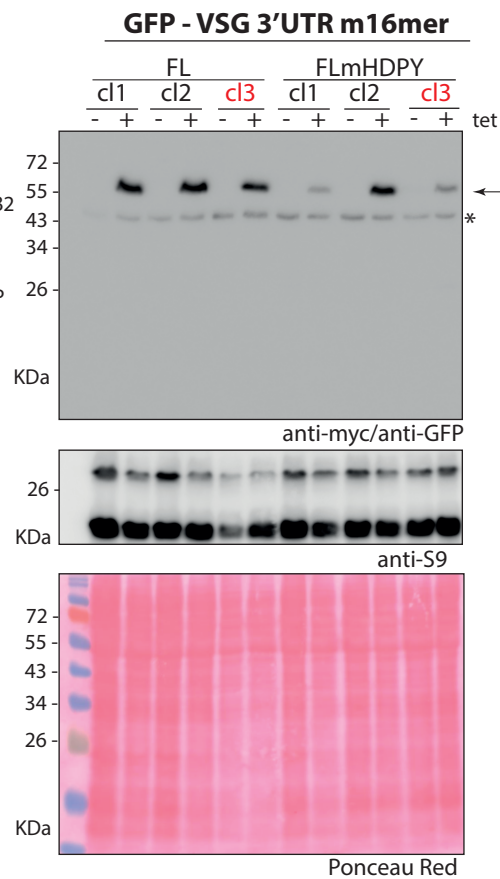**C.**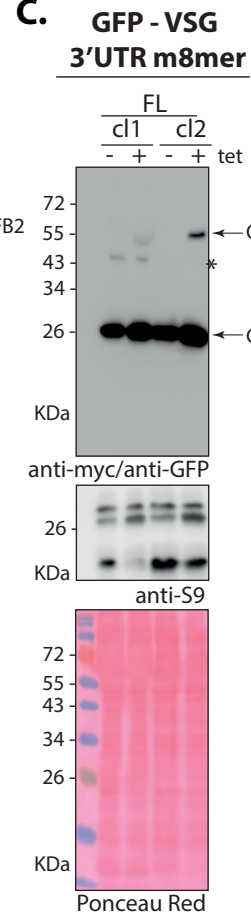**D.**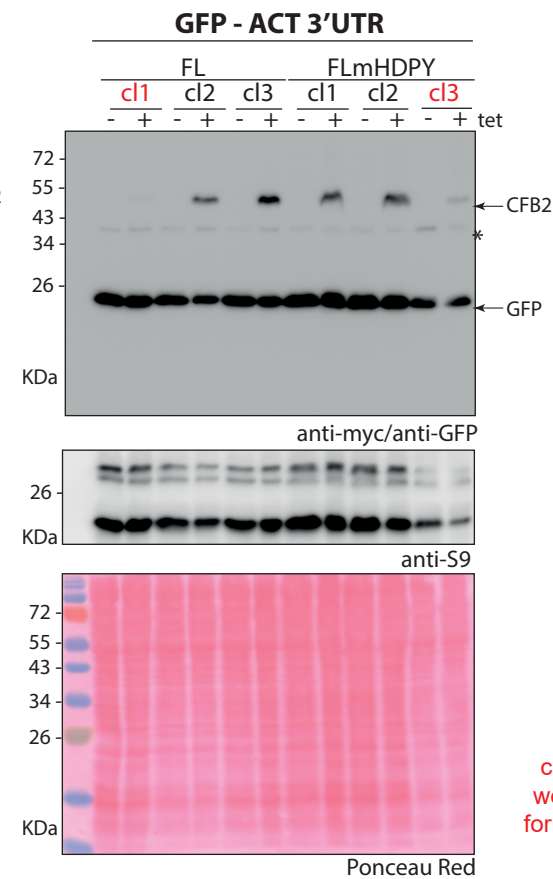**E.**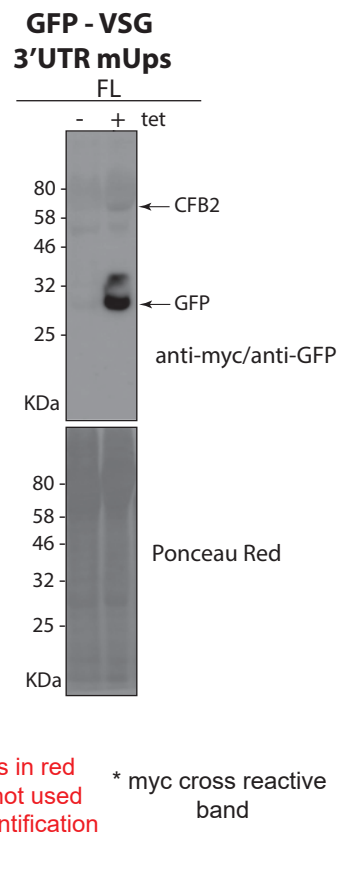

Supplement: supp [file elife-68136-supp-v1.zip]

## N-terminus

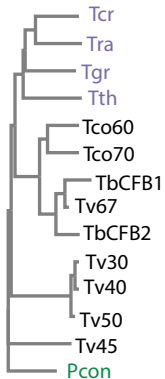

## F-box

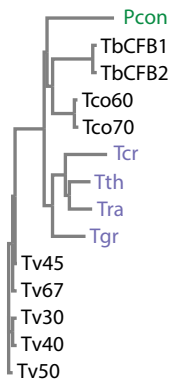

## C-terminus

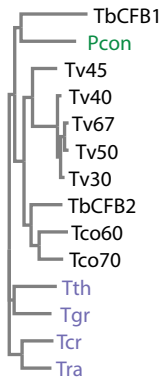

## Central conserved

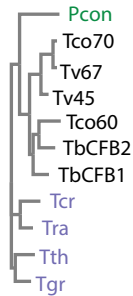

Supplement: supp [file elife-68136-supp-v1.zip]

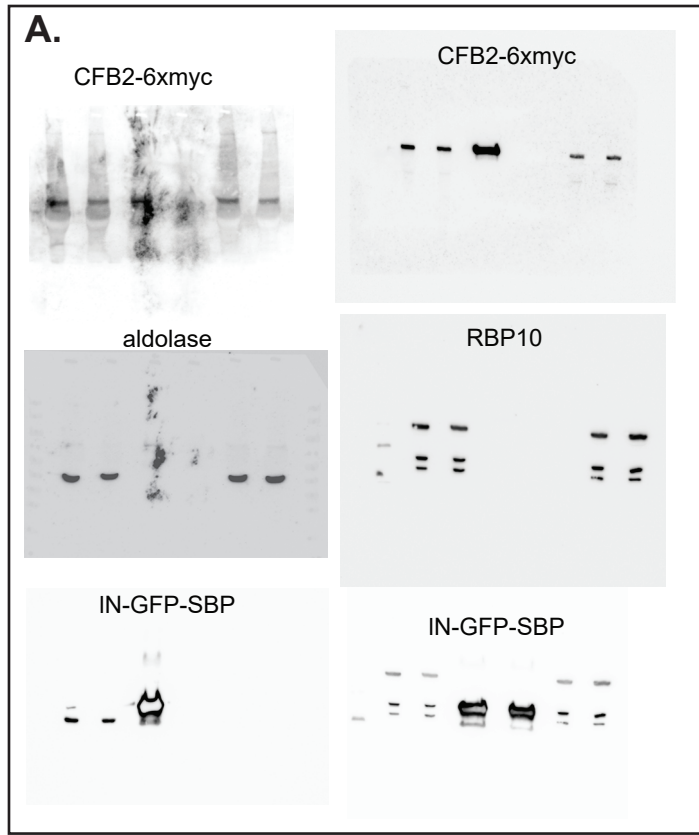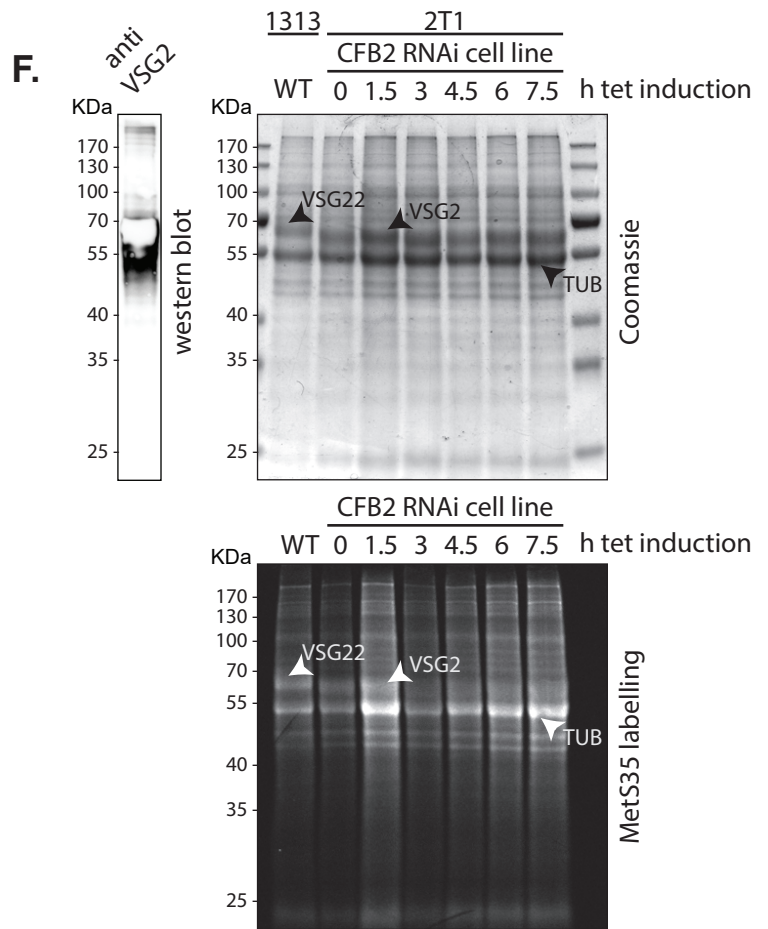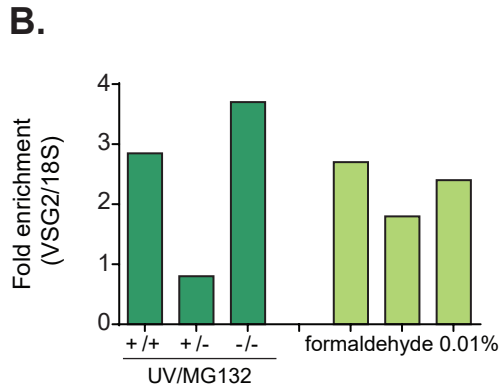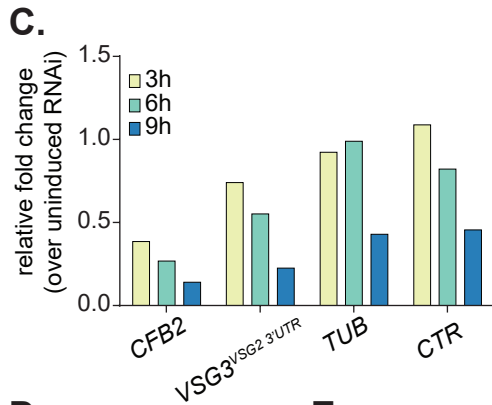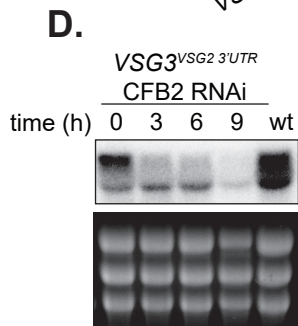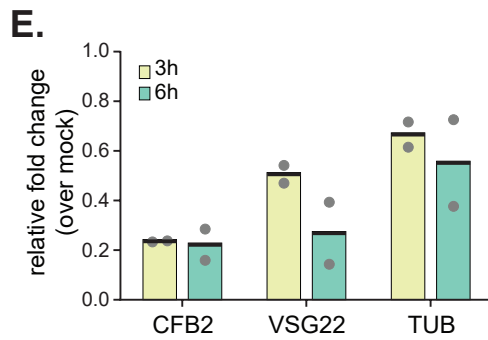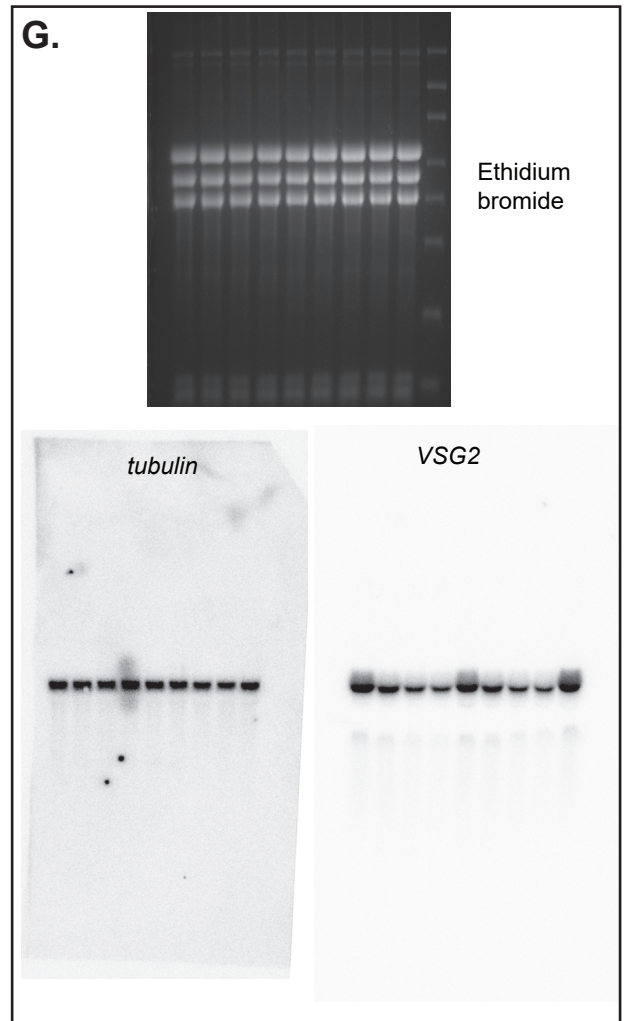

Supplement: supp [file elife-68136-supp-v1.zip]

A. Bloodstream form

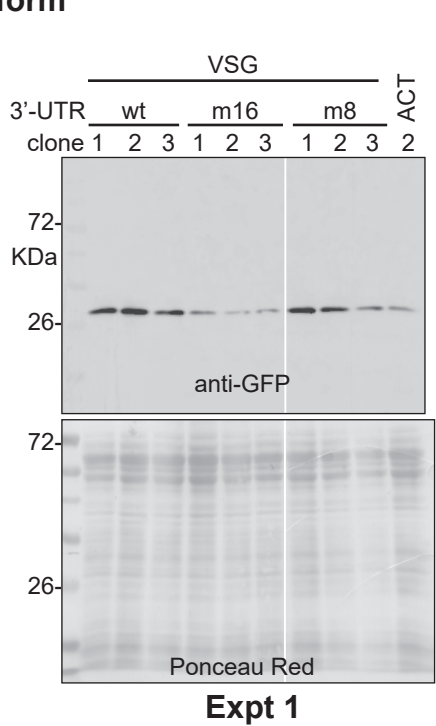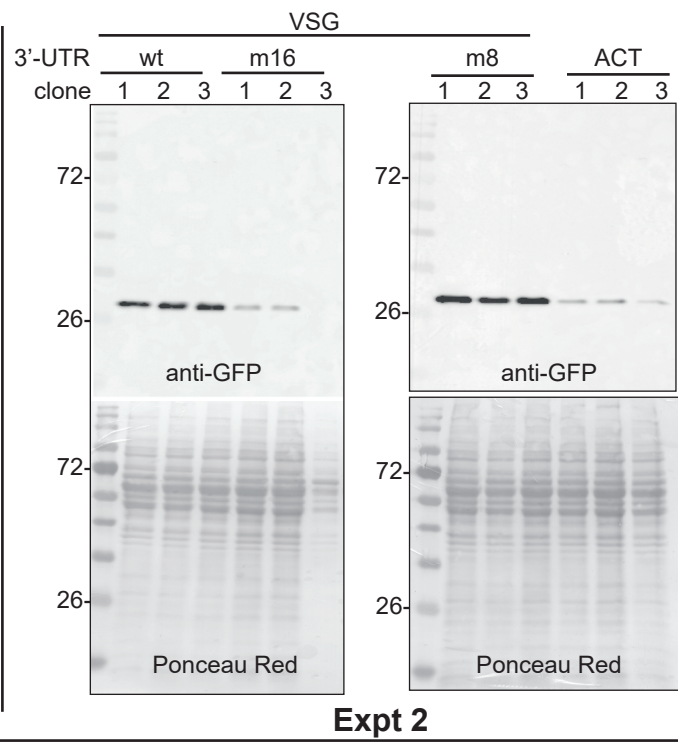

B. Procyclic form

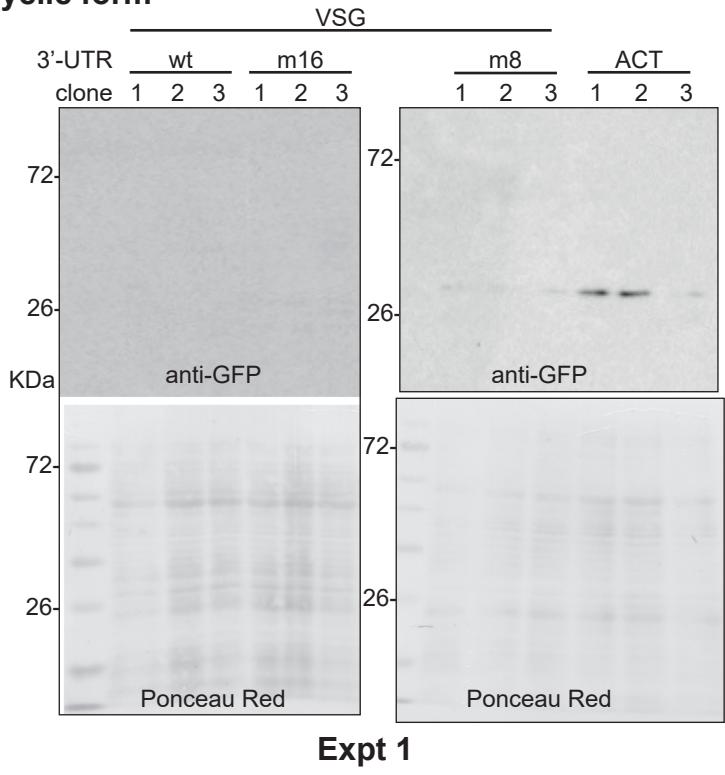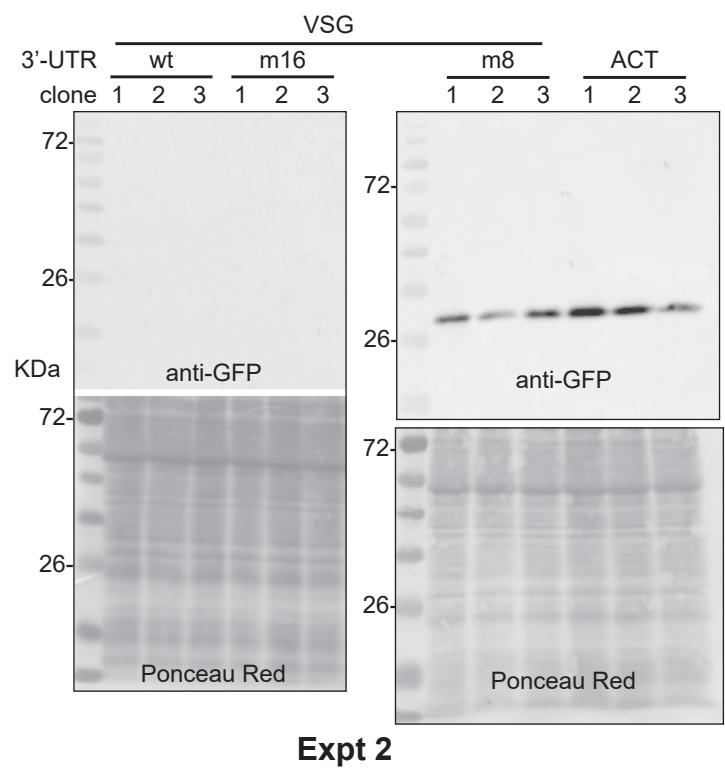

Supplement: supp [file elife-68136-supp-v1.zip]

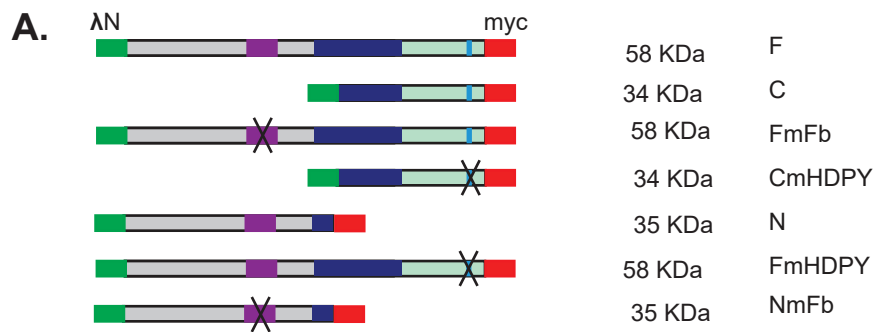

**B.**

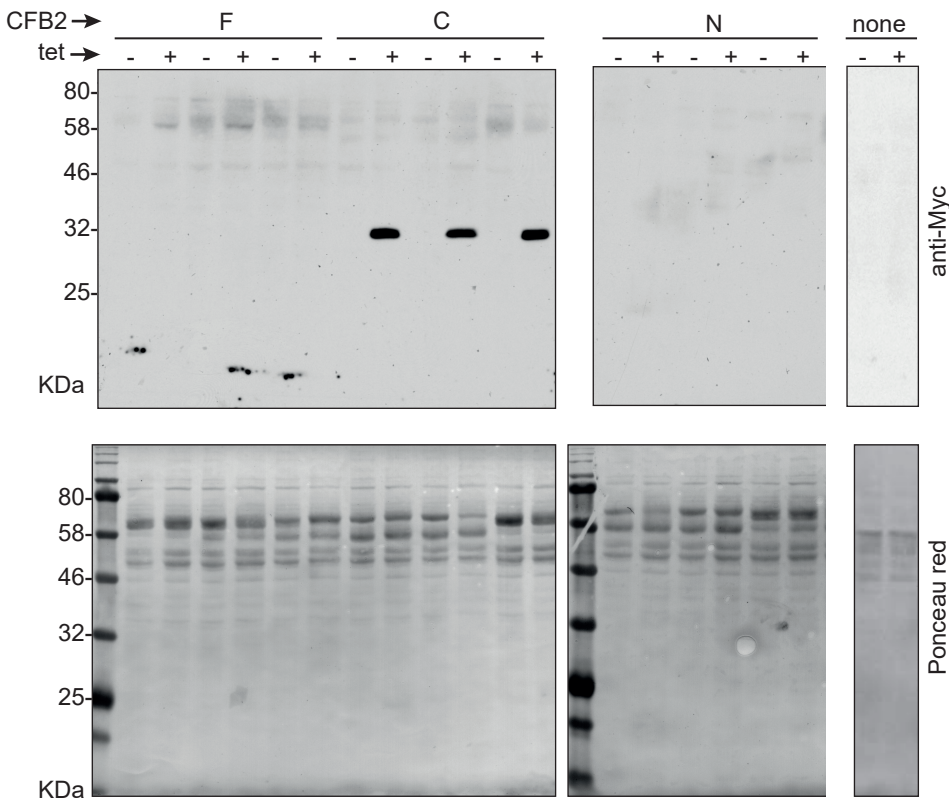

**C.**

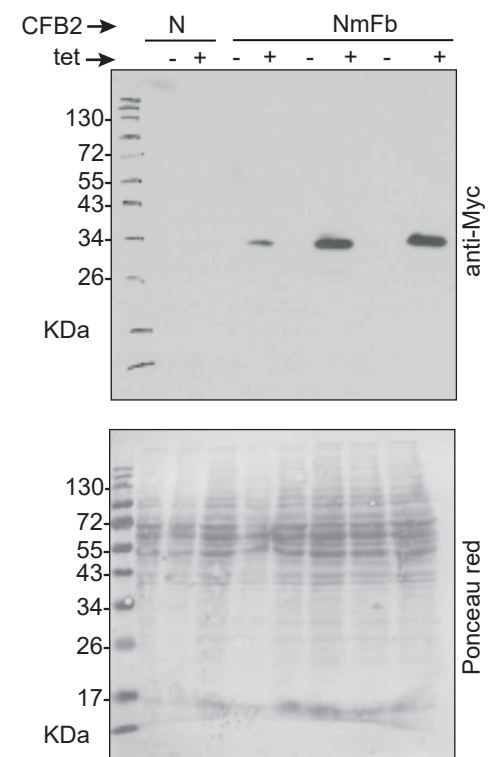

**D.**

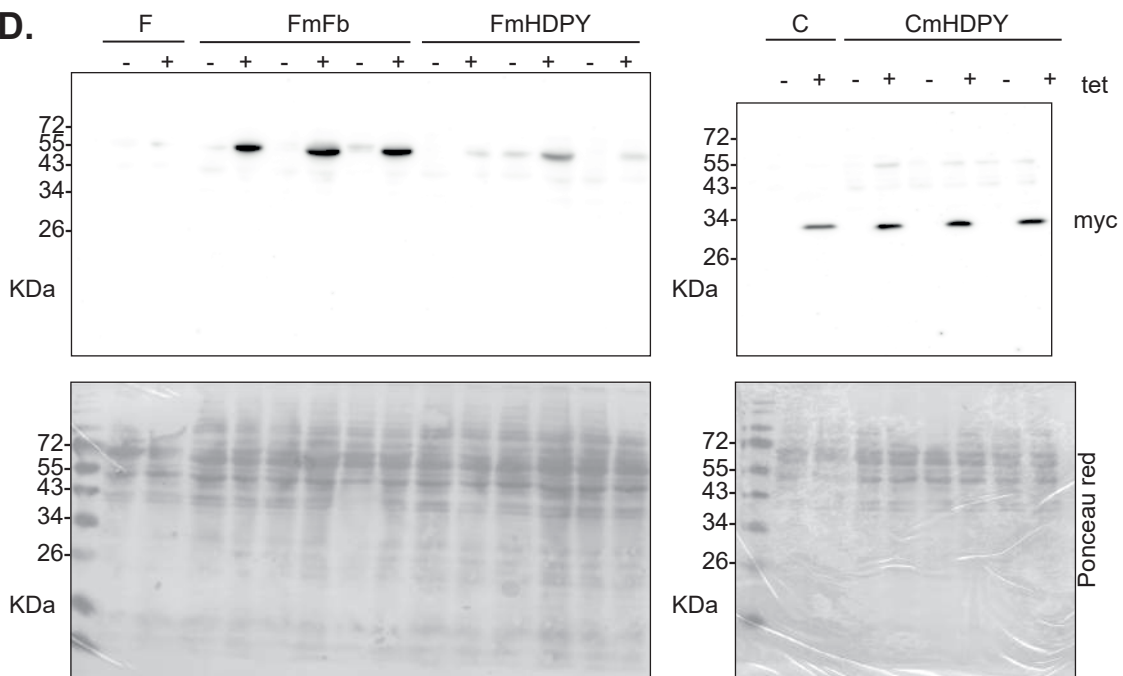

Supplement: supp [file elife-68136-supp-v1.zip]

**A.**

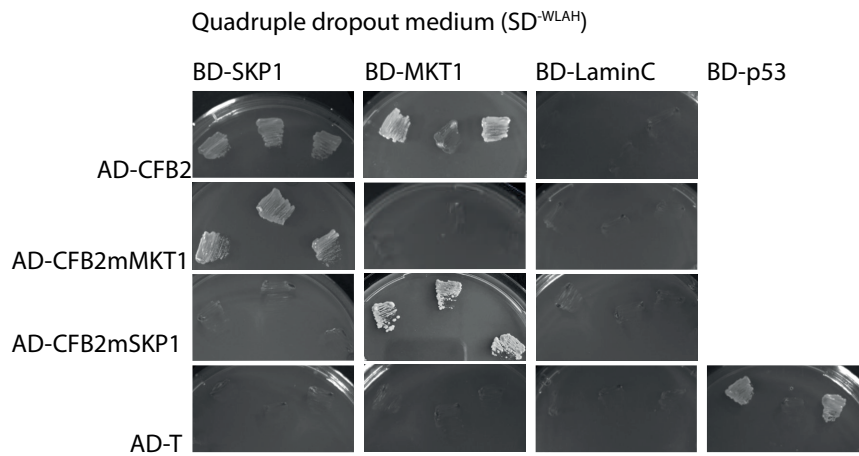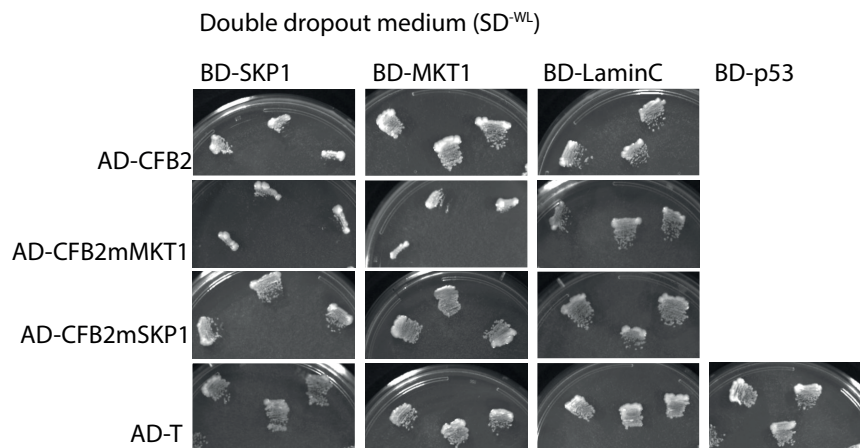

**B.**

|                | pBD SKP1 | pBD MKT1 | pBD LaminC | pBD p53 |
|----------------|----------|----------|------------|---------|
| pAD CFB2 wt    | 1        | 2 (*)    | 3 (C-)     |         |
| pAD CFB2 mMKT1 | 4        | 5        | 6 (C-)     |         |
| pAD CFB2 mSKP1 | 7        | 8        | 9 (C-)     |         |
| pAD T          | 10 (C-)  | 11 (C-)  | 12 (C-)    | 13(C+)  |

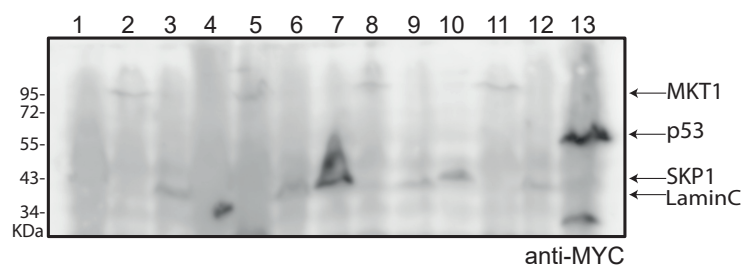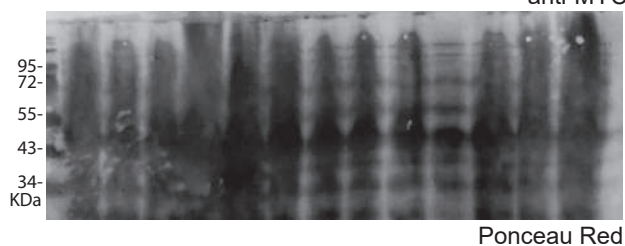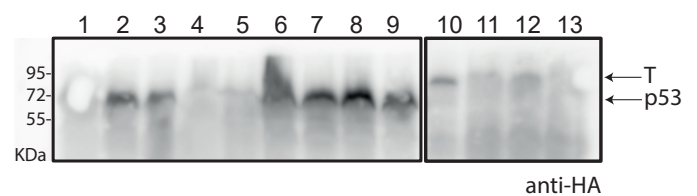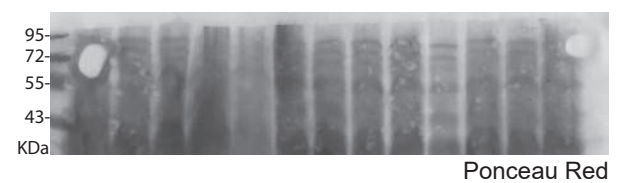

Supplement: supp [file elife-68136-supp-v1.zip]
